# Supplementary material for: Unique lipid cargoes in APOE4 human brain-derived extracellular vesicles recruit cell adhesion molecules and promote tauopathy in Alzheimer’s disease
Source: Research Square preprint supplement (doi:10.21203/rs.3.rs-6508552/v1), 2025-05-26
Supplement: Supplementary file 1 [file 39083563ca2a0e43f2349480.xlsx]

## Sheet: Sheet1
The correlation R value between lipids and proteins
	MEred	MEturquoise	MEyellow	MEbrown	MEpink	MEmagenta	MEpurple	MEgreen	MEblack	MEblue	MEgrey	protein module
MEpurple	0.0962477	0.124953	0.468105	-0.439962	-0.281989	-0.219325	0.0924953	-0.110319	0.287992	-0.171857	-0.368105
MEbrown	0.00506567	-0.178799	0.113508	-0.27561	-0.482552	0.0771107	0.021576	0.178236	0.682176	0.287992	-0.231332
MEturquoise	-0.186679	0.185366	0.0183865	0.131144	0.0461538	-0.505629	-0.481238	0.102439	-0.0470919	0.0930582	-0.0401501
MEgreen	0.114259	-0.105066	-0.0619137	-0.05197	0.0660413	0.109756	0.0484053	-0.0210131	0.191557	0.199062	-0.0380863
MEtan	0.17636	-0.0545966	-0.0840525	0.225328	0.240713	-0.118011	-0.0988743	-0.340901	-0.169231	-0.0983114	0.279737
MEmagenta	-0.14878	0.42045	0.319887	-0.369231	-0.043152	-0.106379	0.317448	-0.00525328	-0.214634	-0.471107	-0.414071
MEpink	0.088743	0.102627	0.0536585	0.150469	0.102064	-0.342214	-0.256285	-0.20788	-0.274672	-0.063227	0.0898687
MEblue	0.00956848	0.0769231	-0.0709193	-0.186867	0.0180113	0.600188	0.580863	0.0724203	-0.164165	-0.217073	-0.0467167
MEred	0.0981238	0.0407129	0.0285178	0.188743	0.0630394	-0.0258912	0.0686679	-0.116135	-0.299812	-0.287805	0.124953
MEyellow	0.215385	0.234334	0.253471	0.00375235	0.0555347	-0.0801126	0.0613508	-0.329831	-0.40469	-0.562664	0.0120075
MEblack	0.193621	-0.219887	-0.0242026	-0.05197	-0.100938	0.215385	0.200563	-0.0917448	0.0757974	0.0508443	0.0339587
MEgreenyellow	0.360038	-0.10469	-0.159287	0.0984991	0.156848	0.292683	0.186304	-0.244653	-0.00318949	0.00712946	0.217073
MEgrey	0.360788	0.143527	0.215385	-0.182364	-0.0213884	-0.00712946	0.211632	-0.321013	-0.173734	-0.302814	0.0208255
Lipid module
