# Supplementary material for: Unique lipid cargoes in APOE4 human brain-derived extracellular vesicles recruit cell adhesion molecules and promote tauopathy in Alzheimer’s disease
Source: Research Square preprint supplement (doi:10.21203/rs.3.rs-6508552/v1), 2025-05-26
Supplement: Supplementary file 2 [file 4e01f200035e32643357c5b9.xlsx]

## Sheet: lipidomics--173 molecular
ID number
Group	Avg. E3BDEV Avg. E4BDEV
CL 18:1-18:1-16:1-16:1	0.2505	0.236
CL 18:2-18:2-18:2-16:1	0.14	0.107
CL 18:2-18:2-18:2-16:0	0.3845	0.3295
CL 18:2-18:1-18:1-16:1, 18:2-18:2-18:1-16:0	0.7235	0.659
CL 16:1-18:1-18:1-18:1	0.6475	0.6275
CL 16:1-18:1-18:1-18:0, 16:0-18:1-18:1-18:1	0.21	0.212
CL 18:2-18:2-18:2-18:2	0.444	0.3915
CL 18:2-18:2-18:2-18:1	0.7865	0.681
CL 18:2-18:2-18:1-18:1	1.043	0.9185
CL 18:2-18:2-18:1-18:0, 18:2-18:1-18:1-18:1	0.9105	0.859
CL 18:1-18:1-18:1-18:1	0.4885	0.462
CL 18:2-18:2-18:2-20:3	0.264	0.263
CL 18:2-18:2-18:2-20:2	0.4045	0.4115
CL 18:1-18:2-18:2-20:2	0.3985	0.398
CL 18:1-18:2-18:2-20:1, 18:1-18:1-18:2-20:2	0.1695	0.183
LCL 18:2-18:2-18:2	0.021	0.0205
LCL 18:2-18:2-18:1	0.063	0.0555
LCL 18:2-18:1-18:1	0.092	0.091
LCL 18:1-18:1-18:1	0.0615	0.064
PS 16:0-16:1	0.104	0.103
PS 16:1-18:2	0.19	0.1075
PS 16:0-18:2	0.065	0.043
PS 17:0-18:2	0.042	0.0355
PS 17:0-18:1	0.027	0.071
PS 18:1-18:2	0.062	0.0665
PG/BMP 16:0-16:0	0.1995	0.1545
PG/BMP 16:0-18:1	1.262	1.318
PG/BMP 18:2-18:2	0.129	0.1445
PG/BMP 18:1-18:1	0.887	0.949
PG/BMP 18:0-18:1	0.6065	0.6385
PG/BMP 18:0-18:0	0.352	0.282
PG/BMP 18:1-22:6	0.1475	0.152
PG/BMP 22:6-22:6	0.099	0.1145
SM N14:0	0.222	0.18
SM N15:0	0.1185	0.091
SM N16:1	0.452	0.3835
SM N16:0	5.1495	4.6535
SM N17:0	0.287	0.2805
SM N18:1	3.3245	3.331
SM N18:0	16.9565	17.3185
SM N19:1	0.2365	0.2315
SM N19:0	0.3835	0.3745
SM N20:1	0.3115	0.3075
SM N20:0	2.9625	3.064
SM N22:1	0.4865	0.483
SM N22:0	1.0175	0.8955
SM N23:1	0.3235	0.35
SM N23:0	0.3315	0.376
SM N24:1	5.6635	6.2765
SM N24:0	1.352	1.3385
SM N25:1	0.976	1.176
SM N25:0	0.2335	0.3175
SM N26:1	0.5635	0.6905
PC D14:0-16:1	0.173	0.147
PC D14:0-16:0	3.83	3.699
PC P16:0-16:0/A16:0-16:1	1.6905	1.82
PC A16:0-16:0	2.3065	2.3725
PC D16:1-16:1/D14:1-18:1	0.3895	0.399
PC D16:1-16:0/D14:1-18:0	13.8825	14.4485
PC D16:0-16:0	48.5455	50.1145
PC P16:0-18:1/P18:1-16:0	2.032	2.3335
PC P16:0-18:0/P18:0-16:0/A18:1-16:0/A16:0-18:1	10.081	11.087
PC A16:0-18:0	3.563	3.7225
PC D16:1-18:2	0.405	0.4135
PC D16:0-18:2	13.0295	12.869
PC D16:0-18:1	180.489	184.755
PC D16:0-18:0	11.833	12.2235
PC P18:0-18:1/P18:1-18:0	3.9965	3.907
PC A18:0-18:1/P18:0-18:0	21.982	20.705
PC A16:0-20:0	13.3115	13.2855
PC D18:2-18:2/D16:0-20:4	10.8575	11.35
PC D18:1-18:2/D16:0-20:3	3.8695	4.1495
PC D18:0-18:2/D18:1-18:1	15.1965	16.1025
PC D18:0-18:1	29.1205	30.4115
PC D18:0-18:0	0.3265	0.32
PC P18:0-20:1/P16:0-22:1	3.7465	3.684
PC P18:0-20:0/P16:0-22:0	5.379	5.041
PC D16:0-22:6/D18:2-20:4	4.4895	5.18
PC D18:1-20:4/D16:0-22:5	2.7315	2.842
PC D18:2-20:2/D18:0-20:4	8.1895	8.596
PC D18:0-20:3	1.1285	1.227
PC D18:0-20:2/P18:2-22:6	1.589	1.5375
PC D18:0-20:1/P18:1-22:6	1.679	1.5395
PC D18:1-22:6/D18:2-22:5	0.8275	0.923
PC D18:0-22:6	1.8955	2.1845
PC D18:0-22:5	0.4365	0.448
PC D18:0-22:4/D20:0-20:4/D20:2-20:2	0.605	0.6035
LPC A16:0	0.0945	0.0715
LPC 16:0	4.1855	3.9485
LPC P18:0	0.068	0.0545
LPC 18:1	1.209	1.2375
LPC 18:0	1.4135	1.356
PE P16:0-18:2	0.734	0.8275
PE P18:1-16:0/P16:0-18:1	11.473	11.8335
PE P18:0-16:0/P16:0-18:0	2.5615	2.5965
PE D16:0-18:2/D16:1-18:1	2.308	2.0755
PE D16:0-18:1	7.531	6.7475
PE P14:0-22:6	0.695	0.617
PE P16:0-20:4	3.1925	2.693
PE P16:0-20:3/P18:1-18:2	1.7015	1.6385
PE P18:1-18:1/P18:0-18:2/P16:0-20:2	16.0765	17.0005
PE P18:0-18:1/P16:0-20:1	6.795	7.0915
PE A18:0-18:1	1.3235	1.2725
PE D16:0-20:4/D18:2-18:2	1.654	1.42
PE D18:1-18:2/D16:0-20:3	2.148	1.932
PE D18:0-18:2/D18:1-18:1/D16:0-20:2	8.545	7.955
PE D18:0-18:1/D16:0-20:1	7.4555	6.85
PE P16:0-22:6/D18:0-18:0/P18:2-20:4	2.4015	2.766
PE P18:1-20:4/P16:0-22:5	6.1715	6.3405
PE P18:0-20:4/P16:0-22:4/P18:1-20:3	13.024	13.178
PE P18:0-20:3	3.7005	4.0315
PE P20:1-18:1/P18:1-20:1	3.2825	3.41
PE P18:1-20:0	1.6875	1.6115
PE D16:0-22:6	3.2625	3.4125
PE D18:1-20:4D/16:0-22:5	4.361	3.966
PE D18:0-20:4/D16:0-22:4	13.027	12.371
PE D18:0-20:3/D18:1-20:2/D16:0-22:3	2.171	2.2835
PE P18:0-22:6/P18:1-22:5/D18:0-20:0	7.7815	8.4755
PE P18:0-22:5/P18:1-22:4	5.882	6.009
PE P18:0-22:4/P20:0-20:4/P18:1-22:3	7.021	7.179
PE A20:0-20:4/P18:0-22:3	2.326	2.4735
PE D18:1-22:6	2.5565	2.575
PE D18:0-22:6/D18:1-22:5	14.1395	14.9025
PE D18:0-22:5/D18:1-22:4	3.538	3.481
PE D20:0-20:4/D18:0-22:4	5.551	5.278
PE D20:0-20:3/D18:0-22:3	0.585	0.5935
LPE P16:0	0.1415	0.1705
LPE 16:1	0.1055	0.1095
LPE 16:0	0.5285	0.537
LPE P18:1	0.1565	0.2095
LPE P18:0	0.2735	0.3335
LPE 18:2	0.0595	0.0585
LPE 18:1	1.824	1.945
LPE 18:0	0.819	0.875
LPE 19:0	0.0515	0.0565
LPE 20:4	0.6165	0.5125
LPE 20:3	0.0765	0.081
LPE 20:1	0.2025	0.2295
CAR 16:0	0.0355	0.0315
CAR 18:1	0.044	0.0465
CAR 18:0	0.027	0.023
CAR 20:1	0.021	0.0265
CAR 22:1	0.023	0.0265
FFA 12:0	0.997	1.3745
FFA 13:0	0.272	0.2655
FFA 14:0	2.482	2.377
FFA 15:0	2.358	2.0755
FFA 16:1	1.5185	1.856
FFA 16:0	50.593	47.6775
FFA 17:1	1.3175	1.5285
FFA 17:0	4.0505	3.4795
FFA 18:2	2.663	3.696
FFA 18:1	18.776	21.6845
FFA 18:0	48.871	44.9335
FFA 20:4	3.3145	4.194
FFA 20:3	0.6725	0.933
FFA 20:1	0.6	0.6875
FFA 22:6	0.827	1.2685
FFA 22:4	1.0625	1.218
CE 14:0	1.2975	1.1805
CE 16:1	6.826	7.2395
CE 16:0	15.0635	15.4715
CE 18:2	32.008	35.9005
CE 18:1	35.3485	37.64
CE 19:1	3.442	3.4755
CE 20:5	1.9355	1.7265
CE 20:4	15.253	15.624
CE 20:3	3.2135	3.444
CE 20:1	7.998	8.035
CE 20:0	10.041	10.0195
CE 22:6	3.6915	3.9645
CE 23:5	3.12	2.9135
free	64.453	64.2335
