# Supplementary material for: Unique lipid cargoes in APOE4 human brain-derived extracellular vesicles recruit cell adhesion molecules and promote tauopathy in Alzheimer’s disease
Source: Research Square preprint supplement (doi:10.21203/rs.3.rs-6508552/v1), 2025-05-26
Supplement: Supplementary file 3 [file 5612bc39c9dc9aa17acc2c8f.docx]

Supplementary Table 1 Demographic table for AD human brain tissue

| **APOE genotype** | **Age (y), mean** | **Sex (male, female)** | **PMI, mean** | **Braak stage, mean** | **Thal stage, mean** |
| --- | --- | --- | --- | --- | --- |
| E4/4 (n=20) | 79 ± 6 | 9M, 11F | 8.7 ± 6.1 | 5.7 ± 0.64 | 4.75 ± 0.54 |
| E3/3 (n=20) | 79 ± 8 | 9M, 11F | 7.74 ± 4.2 | 5.25 ± 0.7 | 4.65 ± 0.65 |
|  | | | | | |

postmortem interval (PMI)
