# Supplementary material for: Unique lipid cargoes in APOE4 human brain-derived extracellular vesicles recruit cell adhesion molecules and promote tauopathy in Alzheimer’s disease
Source: Research Square preprint supplement (doi:10.21203/rs.3.rs-6508552/v1), 2025-05-26
Supplement: Supplementary file 4 [file 64983d701d2439e519077e38.xlsx]

## Sheet: lipid module membership
	MEpurple	MEbrown	MEturquoise	MEgreen	MEtan	MEmagenta	MEpink	MEblue	MEred	MEyellow	MEblack	MEgreenyellow	MEgrey	modules
CL 18:1-18:1-16:1-16:1	-0.0602251	-0.308255	0.224015	0.224953	0.0457786	0.618762	0.571482	-0.215947	0.0183865	0.0242026	0.0983114	-0.0365854	-0.043152	magenta
CL 18:2-18:2-18:2-16:1	-0.159287	-0.0410882	0.830582	-0.0587242	0.168293	-0.0812383	0.411069	-0.626266	-0.0778612	-0.175047	0.0225141	-0.172608	-0.0302064	turquoise
CL 18:2-18:2-18:2-16:0	-0.209568	-0.0827392	0.784615	-0.0311445	0.2	0.0125704	0.416886	-0.52758	-0.0427767	-0.158912	0.0536585	-0.100375	-0.0305816	turquoise
CL 18:2-18:1-18:1-16:1, 18:2-18:2-18:1-16:0	-0.13546	-0.200563	0.6	0.0300188	0.170732	0.38424	0.450281	-0.280863	-0.00337711	-0.0409006	0.00619137	-0.0621013	-0.00487805	turquoise
CL 16:1-18:1-18:1-18:1	0.0559099	-0.258912	0.0621013	0.0506567	0.167355	0.943527	0.281989	0.120826	0.0909944	0.208443	-0.0418386	0.105629	0.113508	magenta
CL 16:1-18:1-18:1-18:0, 16:0-18:1-18:1-18:1	0.201126	-0.0915572	-0.354972	0.0594747	0.0876173	0.644653	-0.0819887	0.423265	0.00938086	0.226829	-0.0697936	0.0322702	0.224015	magenta
CL 18:2-18:2-18:2-18:2	-0.017636	0.128143	0.933396	-0.242964	0.15666	-0.136961	0.165478	-0.661726	-0.0654784	-0.178236	-0.0410882	-0.24015	0.0754221	turquoise
CL 18:2-18:2-18:2-18:1	-0.142214	0.0168856	0.901501	-0.207692	0.19925	-0.101501	0.232083	-0.565291	0.00731707	-0.105253	-0.0621013	-0.178424	0.0140713	turquoise
CL 18:2-18:2-18:1-18:1	-0.169231	-0.0474672	0.841463	-0.264916	0.238462	-0.015197	0.16454	-0.438086	0.0876173	-0.020075	-0.0881801	-0.148593	0.0189493	turquoise
CL 18:2-18:2-18:1-18:0, 18:2-18:1-18:1-18:1	0.0294559	-0.0878049	0.52439	-0.201876	0.0806754	0.5394	-0.049531	-0.0262664	0.226829	0.0791745	-0.296435	-0.0827392	0.0545966	turquoise
CL 18:1-18:1-18:1-18:1	0.188931	-0.178612	-0.168293	-0.0463415	0.043152	0.89606	-0.0470919	0.299625	0.168856	0.365854	-0.156848	0.0311445	0.0953096	magenta
CL 18:2-18:2-18:2-20:3	0.080863	0.191745	0.884991	-0.195122	0.0714822	-0.00900563	0.0236398	-0.567917	-0.0549719	-0.228893	-0.133583	-0.321013	0.00806754	turquoise
CL 18:2-18:2-18:2-20:2	0.0896811	0.209568	0.863415	-0.158724	0.0624765	0.0482176	-0.00525328	-0.566604	-0.0363977	-0.239775	-0.161163	-0.322326	0.0497186	turquoise
CL 18:1-18:2-18:2-20:2	0.118199	0.169231	0.799062	-0.174672	0.0345216	0.240713	-0.00337711	-0.489493	0.0401501	-0.19531	-0.250657	-0.318762	0.0459662	turquoise
CL 18:1-18:2-18:2-20:1, 18:1-18:1-18:2-20:2	0.203377	0.108818	0.564353	-0.0424015	-0.116698	0.457411	-0.0422139	-0.311069	0.0363977	-0.14015	-0.283114	-0.344841	-0.0709193	turquoise
LCL 18:2-18:2-18:1	-0.0868668	-0.000750469	0.836023	-0.188931	0.285929	-0.0335835	0.276735	-0.645591	0.0996248	-0.0536585	0.0958724	-0.3197	0.0816135	turquoise
LCL 18:2-18:1-18:1	-0.13227	-0.00956848	0.513696	-0.158349	0.289306	0.393433	0.185553	-0.278424	0.243152	0.0153846	0.284615	-0.167542	0.10469	turquoise
LCL 18:1-18:1-18:1	0.152158	-0.0739212	-0.190807	0.0238274	0.0140713	0.757411	-0.00619137	0.29606	0.072045	0.168668	0.260413	0.155535	0.185178	magenta
PS 16:0-16:1	0.0553471	0.445591	-0.239024	-0.131144	-0.0155722	0.080863	-0.410319	0.0669794	-0.260038	-0.116323	0.102251	-0.0251407	-0.209193	brown
PS 17:0-18:2	0.0482176	-0.141839	0.0123827	-0.0300188	0.210507	0.067167	0.0397749	0.188555	0.0202627	0.228705	-0.190619	0.0418386	0.543715	grey
PS 18:1-18:2	0.366792	-0.0915572	0.239587	-0.0530957	-0.0838649	-0.0547842	0.0983114	-0.0814259	0.0818011	-0.0116323	-0.222702	-0.159099	0.381614	grey
PG/BMP 16:0-16:0	-0.0684803	0.0362101	0.193996	-0.0290807	0.154597	-0.201501	-0.0932458	-0.112195	0.0493433	-0.0983114	0.126079	0.184615	-0.196623	turquoise
PG/BMP 16:0-18:1	-0.27636	-0.0615385	0.0596623	0.10863	0.107129	-0.0242026	0.284615	-0.215385	0.0590994	0.178049	0.614071	0.0838649	-0.102627	black
PG/BMP 18:2-18:2	-0.330957	0.154409	0.277674	-0.065666	-0.111069	0.00712946	0.190056	-0.125891	0.17561	0.123265	0.306004	-0.159287	-0.369231	grey
PG/BMP 18:1-18:1	-0.255347	0.0341463	-0.278049	0.175422	-0.184428	0.201126	0.0324578	0.487054	0.158724	-0.125516	0.401501	0.335647	0.0564728	blue
PG/BMP 18:0-18:1	0.197561	-0.00675422	0.307317	-0.162289	0.0424015	-0.158912	-0.043152	-0.22439	0.0232645	-0.0570356	0.0527205	0.130582	-0.180675	turquoise
PG/BMP 18:0-18:0	-0.0439024	-0.0260788	0.347467	-0.142964	0.0816135	-0.272983	-0.0703565	-0.0412758	0.0530957	-0.165478	-0.129831	0.0752345	-0.088743	turquoise
PG/BMP 18:1-22:6	-0.36848	0.147842	0.100188	0.165478	-0.114259	-0.0356473	0.168105	-0.112383	-0.0529081	-0.284803	0.248968	0.0485929	-0.373358	turquoise
PG/BMP 22:6-22:6	-0.0043152	0.149719	0.333021	-0.0360225	-0.084803	0.0221388	-0.019137	-0.246154	-0.205253	-0.181989	-0.0450281	-0.0474672	-0.307317	turquoise
SM N14:0	0.0435272	0.0641651	0.619137	-0.512946	0.146154	-0.0956848	0.26773	-0.557223	0.020075	0.0555347	-0.0257036	-0.0369606	0.0639775	turquoise
SM N15:0	-0.0320826	0.130019	0.735647	-0.384991	0.101126	-0.277298	0.111445	-0.584615	-0.0780488	-0.135084	-0.107505	-0.118199	-0.0493433	turquoise
SM N16:1	-0.0163227	0.0407129	0.306191	-0.54015	0.155722	-0.244278	0.0534709	-0.309193	-0.130206	0.128705	0.0228893	0.045591	-0.0332083	turquoise
SM N16:0	-0.220075	-0.0433396	0.540713	-0.460788	0.107317	-0.423827	0.0309568	-0.408818	0.0373358	0.0401501	-0.0390244	0.0043152	-0.147655	turquoise
SM N17:0	-0.416886	-0.18424	0.498687	-0.251782	0.159099	-0.253471	0.143152	-0.317073	0.186867	0.127955	0.0433396	-0.00225141	-0.220263	turquoise
SM N18:1	-0.110319	-0.00731707	0.268293	-0.196623	0.231707	-0.133396	0.450657	-0.421388	-0.218949	-0.0288931	0.278236	0.0439024	-0.026454	turquoise
SM N18:0	0.141839	0.0377111	0.255535	-0.152533	-0.0065666	-0.190432	0.188931	-0.388555	-0.0893058	-0.0228893	-0.0941839	-0.123827	-0.221388	turquoise
SM N19:1	-0.284615	-0.410882	-0.175985	-0.0373358	0.456473	0.136398	0.418762	-0.0315197	0.163227	0.482552	0.300188	0.281426	0.109944	yellow
SM N19:0	-0.281614	-0.313133	-0.041651	0.017636	0.27167	0.261351	0.294934	0.132083	0.556285	0.434146	0.282739	0.289869	-0.0202627	red
SM N20:1	0.15272	0.0577861	0.344278	-0.442964	0.2	-0.115009	0.0701689	-0.363415	-0.127392	0.3606	-0.0330206	0.0724203	0.138274	turquoise
SM N20:0	0.581989	0.240338	0.210694	-0.0484053	-0.119512	0.0742964	-0.150469	-0.208443	-0.0277674	0.0765478	-0.079925	-0.103565	0.16454	purple
SM N22:1	-0.138086	-0.00600375	0.282364	-0.457786	-0.00487805	-0.317636	-0.0305816	-0.126266	0.075985	0.243152	0.0373358	0.127767	0.0283302	turquoise
SM N22:0	-0.157036	-0.0131332	0.478424	-0.429081	0.0739212	-0.28743	-0.00469043	-0.278424	0.0484053	0.161163	-0.119137	0.036773	-0.179737	turquoise
SM N23:1	-0.168856	-0.125141	-0.193809	-0.16454	-0.18424	0.196811	-0.00787992	0.55197	0.0906191	0.157036	0.106567	0.0630394	0.0772983	blue
SM N23:0	-0.163415	0.00356473	-0.0984991	-0.0446529	-0.224765	-0.164728	-0.319325	0.417448	0.283865	0.123265	0.172608	0.0628518	-0.149156	blue
SM N24:1	-0.0268293	-0.0682927	-0.407692	-0.11576	-0.294747	0.0146341	-0.460413	0.732645	0.227392	0.0947467	0.0386492	0.151782	0.11182	blue
SM N24:0	-0.121951	-0.0577861	0.269231	-0.454784	-0.0238274	-0.23546	-0.278049	-0.0174484	0.270544	0.263415	-0.110882	0.124203	-0.173921	turquoise
SM N25:1	0.087242	-0.030394	-0.649906	0.0170732	-0.27636	0.102814	-0.394371	0.8	0.140713	0.150657	0.0545966	0.218762	0.14015	blue
SM N25:0	-0.0514071	-0.0973734	-0.524203	-0.0943715	-0.194559	0.167355	-0.413508	0.747467	0.258724	0.18349	0.063227	0.228518	0.114822	blue
SM N26:1	-0.0622889	0.0065666	-0.546717	-0.00637899	-0.25591	0.0694184	-0.524765	0.766792	0.215009	0.109756	0.0536585	0.200563	0.00412758	blue
PC D14:0-16:1	-0.186492	-0.329644	-0.0718574	0.266041	0.266041	0.205066	0.838086	-0.0836773	0.0679174	0.166979	0.190056	0.101501	0.129456	pink
PC D14:0-16:0	0.713884	0.0787992	0.230582	-0.0390244	-0.241463	0.137336	0.294934	-0.283114	-0.435835	-0.0412758	-0.241463	-0.150844	0.193809	purple
PC P16:0-16:0/A16:0-16:1	-0.156473	-0.0968105	0.060788	0.0547842	-0.0249531	-0.0915572	0.207129	-0.0996248	0.000187617	-0.0172608	-0.093621	-0.242777	-0.383114	grey
PC A16:0-16:0	0.118574	-0.239962	0.0232645	-0.245028	-0.0397749	-0.045591	0.0630394	-0.160225	0.00787992	0.379174	-0.105629	-0.167542	-0.134709	yellow
PC D16:1-16:1/D14:1-18:1	-0.0932458	-0.0891182	0.27955	0.162289	0.0842402	0.0337711	0.875047	-0.263415	-0.245779	-0.020075	0.329456	0.164165	0.232833	pink
PC D16:1-16:0/D14:1-18:0	0.134146	-0.186492	0.182176	0.202251	-0.0457786	0.193809	0.851595	-0.324578	-0.320075	-0.0707317	0.195685	-0.0140713	0.190056	pink
PC D16:0-16:0	0.77561	0.144653	0.209193	-0.30075	-0.261351	-0.017636	0.114071	-0.290432	-0.397186	0.0210131	-0.18349	-0.26773	0.126079	purple
PC P16:0-18:1/P18:1-16:0	-0.260788	-0.149719	0.00562852	0.102064	0.0232645	-0.0103189	-0.00750469	0.189118	0.190432	-0.0654784	0.0675422	0.0247655	-0.152158	blue
PC P16:0-18:0/P18:0-16:0/A18:1-16:0/A16:0-18:1	0.18349	-0.25122	-0.419887	-0.0594747	-0.169418	0.290994	-0.211445	0.498687	0.0579737	0.429081	0.0804878	0.0757974	0.00581614	blue
PC A16:0-18:0	0.347655	-0.286867	-0.126266	-0.120826	0.0512195	0.406379	0.136961	-0.000375235	0.0714822	0.679737	-0.0118199	-0.0193246	0.242402	yellow
PC D16:1-18:2	-0.138649	-0.175422	0.556098	-0.035272	0.257786	-0.161538	0.494371	-0.443152	-0.0861163	0.0161351	0.200563	0.0684803	0.182552	turquoise
PC D16:0-18:2	-0.0919325	-0.0825516	0.583114	-0.269231	0.255535	-0.257786	0.404878	-0.37955	-0.136961	0.0594747	0.209756	0.146904	0.358912	turquoise
PC D16:0-18:1	0.317636	-0.300188	0.0836773	-0.158537	0.0577861	0.220263	0.471107	-0.181989	-0.359662	0.091182	0.111069	0.113884	0.279174	pink
PC D16:0-18:0	0.941651	0.196248	0.0842402	-0.287054	-0.294934	0.0874296	-0.192308	-0.202814	-0.206754	0.111257	-0.322326	-0.239024	0.158161	purple
PC P18:0-18:1/P18:1-18:0	-0.0673546	-0.40788	-0.017636	-0.333396	0.34728	0.129456	-0.0337711	0.181614	0.310319	0.812195	0.143715	0.219137	0.276173	yellow
PC A18:0-18:1/P18:0-18:0	0.0506567	-0.372983	-0.313696	-0.193809	0.24015	0.193809	0.015197	0.168856	0.185178	0.926079	0.0634146	0.125141	0.124953	yellow
PC A16:0-20:0	0.0604128	-0.393058	-0.285178	-0.152158	0.188931	0.378236	0.0155722	0.16773	0.139024	0.809756	-0.0883677	-0.131895	0.0765478	yellow
PC D18:2-18:2/D16:0-20:4	0.146341	0.248218	0.76379	-0.209944	0.027955	-0.161726	0.202064	-0.721013	-0.181426	-0.300938	-0.0123827	-0.116698	0.105253	turquoise
PC D18:1-18:2/D16:0-20:3	0.0793621	0.000750469	0.671857	-0.234522	0.133583	-0.279925	0.0919325	-0.506191	-0.138649	-0.0553471	0.0697936	-0.139024	0.153659	turquoise
PC D18:0-18:2/D18:1-18:1	0.226454	-0.239587	0.0470919	-0.165478	-0.056848	0.0904315	0.121201	0.145591	-0.0649156	0.109381	0.218574	0.170544	0.625141	grey
PC D18:0-18:1	0.724578	0.0324578	-0.389681	-0.116323	-0.369981	0.130582	-0.332645	0.336773	-0.114447	0.181801	-0.113133	0.0637899	0.282739	purple
PC D18:0-18:0	0.0330206	-0.265478	-0.224578	0.0187617	0.185741	0.169794	-0.124015	0.0930582	0.254034	0.287992	0.0816135	0.25122	0.297373	yellow
PC P18:0-20:1/P16:0-22:1	0.117824	-0.421576	-0.169606	-0.218574	0.154221	0.26773	-0.0180113	0.0954972	0.307317	0.942214	0.143902	0.0906191	0.32439	yellow
PC P18:0-20:0/P16:0-22:0	0.0906191	-0.363227	-0.368293	-0.0797373	0.164165	0.295872	-0.0971857	0.292683	0.360038	0.9	0.149343	0.20394	0.16773	yellow
PC D16:0-22:6/D18:2-20:4	0.163039	0.330019	0.50075	-0.0487805	-0.0971857	0.0703565	-0.0889306	-0.259099	-0.303002	-0.544653	0.0842402	0.0949343	0.0236398	turquoise
PC D18:1-20:4/D16:0-22:5	0.0333959	0.179362	0.763227	-0.154034	-0.00825516	0.0339587	0.301689	-0.57167	-0.246341	-0.399812	-0.00806754	-0.10394	0.145403	turquoise
PC D18:2-20:2/D18:0-20:4	0.357223	0.330957	0.64878	-0.202439	-0.063227	-0.112758	0.118762	-0.642402	-0.150657	-0.261351	-0.177111	-0.158537	0.180675	turquoise
PC D18:0-20:3	0.439962	0.0530957	0.375422	-0.259475	-0.0956848	-0.163227	-0.287805	-0.3197	-0.082364	0.0287054	-0.221388	-0.320263	0.0752345	turquoise
PC D18:0-20:2/P18:2-22:6	0.102439	-0.404315	0.0195122	-0.242777	0.20469	0.0442777	0.0553471	0.148218	0.271107	0.65666	0.158912	0.283677	0.510882	yellow
PC D18:0-20:1/P18:1-22:6	-0.0213884	-0.269981	-0.253283	-0.252345	0.309756	-0.0283302	-0.095122	0.255159	0.333396	0.780675	0.199437	0.265103	0.26773	yellow
PC D18:1-22:6/D18:2-22:5	0.158537	0.0515947	0.642589	-0.204315	0.114822	0.139212	0.162477	-0.457974	-0.142777	-0.0206379	0.106942	-0.108443	0.137711	turquoise
PC D18:0-22:6	0.309193	0.359662	0.39606	-0.0135084	-0.157411	0.0789869	-0.108255	-0.145216	-0.351032	-0.519887	-0.0589118	0.0677298	0.0429644	turquoise
PC D18:0-22:5	0.084803	0.194559	0.617636	-0.112946	-0.034334	0.11182	-0.0594747	-0.39137	-0.137899	-0.339775	-0.112383	-0.0424015	-0.0356473	turquoise
PC D18:0-22:4/D20:0-20:4/D20:2-20:2	0.283677	0.25591	0.670544	-0.196435	-0.026454	-0.0196998	-0.0517824	-0.484615	-0.064728	-0.201876	-0.191932	-0.191745	0.108068	turquoise
LPC 16:0	0.200188	-0.203189	0.196623	-0.139962	0.273921	0.0609756	0.0268293	-0.162101	0.2	0.194371	-0.065666	0.00225141	0.322139	turquoise
LPC P18:0	-0.441463	-0.181801	0.0928705	-0.0382739	0.305629	0.126642	0.514447	-0.021576	0.280113	0.119512	0.0906191	-0.163415	0.0114447	pink
LPC 18:1	0.153846	-0.221201	-0.483302	0.559475	0.0373358	0.370356	0.126454	0.358724	0.0714822	-0.060788	0.115197	0.0801126	0.202627	green
LPC 18:0	0.382176	-0.0362101	0.478424	-0.47561	0.0217636	-0.0305816	-0.0643527	-0.333959	0.163227	0.266041	-0.191557	-0.15197	0.120826	turquoise
PE P16:0-18:2	-0.111445	0.13227	-0.525891	0.0983114	-0.290619	0.0195122	0.0525328	0.558724	0.178799	0.0223265	0.150844	0.197373	0.0881801	blue
PE P18:1-16:0/P16:0-18:1	-0.209944	-0.0767355	-0.601501	0.159475	-0.0750469	0.159475	-0.250281	0.82833	0.286679	-0.00562852	-0.157786	0.162852	0.0664165	blue
PE P18:0-16:0/P16:0-18:0	-0.145028	-0.305066	-0.546717	0.142777	0.079925	0.0819887	-0.0977486	0.599812	0.118199	0.09606	0.0926829	0.304878	0.212383	blue
PE D16:0-18:2/D16:1-18:1	-0.317448	-0.12364	-0.386492	0.107129	0.160038	0.067167	-0.0198874	0.621388	0.278236	-0.00150094	-0.156098	0.27955	-0.00525328	blue
PE D16:0-18:1	-0.130957	-0.178236	-0.0953096	-0.0369606	0.146341	0.0469043	0.0054409	0.199812	0.234334	0.149719	-0.249719	0.107129	0.0666041	blue
PE P14:0-22:6	0.230769	-0.17636	-0.116135	-0.239024	-0.0384615	0.178424	0.109568	0.254221	0.0923077	0.306942	-0.156098	0.027955	0.359287	blue
PE P16:0-20:4	-0.168856	0.220638	0.615572	-0.255347	-0.00450281	-0.293996	-0.0365854	-0.527017	0.0904315	-0.204503	-0.325891	-0.236585	-0.245403	turquoise
PE P16:0-20:3/P18:1-18:2	-0.253659	-0.00581614	0.179925	-0.286492	0.159287	-0.0155722	-0.178049	0.078424	0.182176	0.0281426	-0.267355	0.0649156	0.0363977	turquoise
PE P18:1-18:1/P18:0-18:2/P16:0-20:2	-0.196435	-0.0512195	-0.598124	0.245591	-0.0984991	0.276923	-0.220638	0.870919	0.159475	-0.027955	-0.150844	0.203002	0.0350844	blue
PE P18:0-18:1/P16:0-20:1	-0.218574	-0.0787992	-0.634146	0.0399625	-0.107692	0.17636	-0.203002	0.879925	0.276173	0.0108818	-0.0776735	0.265103	0.0510319	blue
PE A18:0-18:1	-0.102064	-0.0983114	-0.541088	-0.0123827	0.0722326	0.217448	-0.102251	0.80788	0.195497	0.129081	-0.0741088	0.388743	0.0801126	blue
PE D16:0-20:4/D18:2-18:2	-0.149906	0.315009	0.661914	-0.266417	0.10788	-0.242402	0.0043152	-0.561726	-0.0819887	-0.177298	-0.226079	-0.167542	-0.269606	turquoise
PE D18:1-18:2/D16:0-20:3	-0.204503	-0.243902	-0.347092	0.0971857	0.163977	0.211257	-0.0043152	0.621201	0.136398	0.141839	-0.197373	0.0472795	0.221388	blue
PE D18:0-18:2/D18:1-18:1/D16:0-20:2	-0.195122	-0.168856	-0.38818	-0.0245779	0.0744841	-0.00356473	0.0530957	0.561538	0.0821764	0.127392	-0.0677298	0.336398	0.315947	blue
PE D18:0-18:1/D16:0-20:1	0.000562852	0.054409	-0.400563	0.0247655	0.0596623	-0.0673546	0.106567	0.427205	0.0439024	0.124578	-0.104128	0.155722	0.111069	blue
PE P16:0-22:6/D18:0-18:0/P18:2-20:4	0.0825516	0.782176	0.0292683	0.0756098	-0.307317	-0.343527	-0.132833	-0.215197	-0.381238	-0.46379	0.0996248	-0.0821764	-0.313696	brown
PE P18:1-20:4/P16:0-22:5	-0.242589	0.462477	0.119512	-0.18424	-0.237711	-0.210507	-0.205441	-0.0429644	-0.268293	-0.490619	-0.234146	-0.190432	-0.400563	brown
PE P18:0-20:4/P16:0-22:4/P18:1-20:3	0.00225141	0.749156	0.261914	-0.242964	-0.250844	-0.266041	-0.188555	-0.230206	-0.153471	-0.394559	-0.333021	-0.438837	-0.346154	brown
PE P18:0-20:3	-0.241651	0.238462	-0.212008	-0.237148	-0.313508	-0.00356473	-0.230769	0.319137	0.161163	0.020075	-0.103002	-0.434522	-0.211257	blue
PE P20:1-18:1/P18:1-20:1	-0.201876	-0.130769	-0.609756	0.158724	-0.0709193	0.231895	-0.2	0.90075	0.231332	0.0405253	-0.0861163	0.280113	0.0472795	blue
PE P18:1-20:0	-0.168293	-0.174672	-0.624578	0.120075	0.0902439	0.31182	-0.228143	0.864353	0.35197	0.19531	-0.0885553	0.259662	0.183677	blue
PE D16:0-22:6	0.206567	0.889681	0.216886	-0.0752345	-0.374296	-0.14803	-0.210882	-0.212008	-0.269231	-0.42758	-0.0521576	-0.263602	-0.252158	brown
PE D18:1-20:4D/16:0-22:5	-0.263602	0.327017	0.513508	-0.338274	-0.0673546	-0.0954972	0.0984991	-0.309944	-0.127392	-0.181238	-0.178799	-0.0928705	-0.143902	turquoise
PE D18:0-20:4/D16:0-22:4	0.24334	0.719137	0.487242	-0.210131	-0.187617	-0.34334	0.108443	-0.566979	-0.264916	-0.243715	-0.012758	-0.338649	-0.106942	brown
PE D18:0-20:3/D18:1-20:2/D16:0-22:3	0.358537	0.418762	-0.16379	-0.182176	-0.405441	-0.215385	-0.0527205	0.0405253	-0.249343	-0.0551595	-0.114634	-0.400188	0.0476548	brown
PE P18:0-22:6/P18:1-22:5/D18:0-20:0	0.103565	0.919512	0.169981	-0.0258912	-0.301876	-0.118011	-0.144278	-0.142589	-0.319325	-0.470544	-0.0120075	-0.180675	-0.239212	brown
PE P18:0-22:5/P18:1-22:4	-0.0300188	0.692683	-0.143527	0.103002	-0.353659	0.0891182	-0.238274	0.304128	-0.34728	-0.381426	-0.129831	0.00375235	-0.223265	brown
PE P18:0-22:4/P20:0-20:4/P18:1-22:3	-0.032833	0.766417	0.119512	-0.0690432	-0.323452	-0.0245779	-0.164353	-0.0136961	-0.275797	-0.287805	-0.123265	-0.260976	-0.203752	brown
PE A20:0-20:4/P18:0-22:3	-0.00581614	0.433771	-0.178987	-0.00562852	-0.433583	-0.0258912	-0.187054	0.35272	0.0994371	-0.276923	-0.191182	-0.119325	-0.198124	brown
PE D18:1-22:6	0.107505	0.589681	-0.161538	0.0371482	-0.283677	-0.101126	-0.251032	0.285366	-0.29137	-0.417824	0.079925	0.196435	-0.0484053	brown
PE D18:0-22:6/D18:1-22:5	0.245966	0.903377	0.233208	-0.0324578	-0.333771	-0.191182	-0.205629	-0.257036	-0.400563	-0.461914	0.0313321	-0.179362	-0.137336	brown
PE D18:0-22:5/D18:1-22:4	0.303002	0.69925	0.139024	-0.269606	-0.297561	-0.0581614	-0.0485929	-0.0390244	-0.130394	-0.238274	-0.212195	-0.367542	0.00619137	brown
PE D20:0-20:4/D18:0-22:4	0.406567	0.726079	0.291182	-0.282176	-0.232833	-0.230769	0.0459662	-0.377111	-0.287242	-0.095122	-0.0973734	-0.430957	-0.00525328	brown
PE D20:0-20:3/D18:0-22:3	0.0157598	-0.0652908	-0.2606	-0.084803	-0.05197	0.150657	0.021576	0.393058	0.245216	0.163977	-0.0390244	0.304503	0.404503	blue
LPE P16:0	-0.26454	0.149719	0.436773	-0.141463	-0.087242	-0.202251	0.250657	-0.318762	0.0626642	-0.386492	0.14728	0.0170732	-0.0450281	turquoise
LPE 16:1	-0.170356	-0.0926829	-0.0525328	0.0557223	-0.0101313	0.0125704	0.476548	-0.00487805	0.0585366	0.0587242	0.244653	0.0442777	0.172045	turquoise
LPE 16:0	-0.11576	0.0619137	0.251407	-0.3394	0.142402	-0.0921201	0.174296	-0.258724	-0.05197	0.0129456	0.196248	-0.151595	0.058349	turquoise
LPE P18:1	-0.355347	0.109193	0.320638	0.0101313	-0.145028	-0.0129456	0.20075	-0.108443	0.0966229	-0.434709	0.254972	0.0196998	-0.136961	turquoise
LPE P18:0	-0.190432	0.172233	0.426266	-0.0677298	0.0482176	0.0365854	0.185178	-0.199437	0.000375235	-0.329456	0.179737	0.107692	0.0363977	turquoise
LPE 18:2	-0.179362	0.0317073	0.0332083	-0.111257	0.195497	0.063227	0.16454	0.107129	0.1394	0.336023	0.322514	0.21576	0.527205	grey
LPE 18:1	-0.065666	0.00694184	-0.619512	0.106567	-0.133396	0.137336	-0.373358	0.654409	0.0534709	0.124953	0.0131332	-0.0382739	0	blue
LPE 18:0	0.0354597	0.0774859	0.505253	-0.215009	0.223827	0.0844278	0.201313	-0.315572	-0.0202627	-0.0560976	0.187242	0.0101313	0.313884	turquoise
LPE 19:0	-0.00225141	0.0129456	-0.521764	0.0326454	-0.0221388	0.278612	-0.326454	0.529081	0.0450281	0.127767	0.0268293	-0.00619137	-0.15591	blue
LPE 20:4	0.133771	0.306754	0.641088	-0.173546	0.063227	-0.161163	0.079925	-0.659099	-0.202251	-0.230394	-0.199625	-0.380675	0.0144465	turquoise
LPE 20:3	0.0410882	-0.0742964	-0.191745	-0.12364	-0.103565	-0.0923077	-0.278612	0.182364	-0.0129456	0.133959	-0.0410882	-0.283865	0.0172608	blue
LPE 20:1	0.0247655	-0.0861163	-0.720075	0.137711	-0.148968	0.186492	-0.434897	0.780113	0.108068	0.23152	0.0459662	0.0782364	0.0461538	blue
CAR 16:0	-0.183677	0.143715	0.103565	0.0694184	-0.149906	0.00300188	-0.350844	0.169606	0.0317073	-0.163227	-0.205441	0.0836773	-0.545028	grey
CAR 20:1	0.0924953	-0.158349	-0.0418386	-0.0457786	-0.152345	0.0142589	-0.0958724	0.0315197	0.0105066	0.0574109	-0.0690432	-0.234897	-0.478987	grey
FFA 12:0	-0.0168856	-0.0399625	-0.320826	0.0761726	-0.16454	-0.000375235	-0.00281426	0.349906	-0.138086	0.0863039	0.536023	0.7197	0.141088	greenyellow
FFA 13:0	0.0302064	-0.263415	-0.220263	0.282552	0.0165103	0.109756	0.00393996	0.273734	-0.0054409	0.0896811	0.242026	0.917636	0.215385	greenyellow
FFA 14:0	-0.258161	-0.198124	-0.0320826	0.157974	0.317636	0.00769231	0.137523	0.150281	0.0202627	0.00956848	0.333396	0.916323	0.215197	greenyellow
FFA 15:0	-0.256473	-0.37167	-0.0761726	0.0465291	0.501126	0.097561	0.198311	0.131707	0.049531	0.274296	0.159662	0.785178	0.271482	greenyellow
FFA 16:1	-0.24878	-0.0577861	-0.0138837	0.111257	0.0227017	0.0465291	0.382176	-0.0485929	0.0457786	0.069606	0.954597	0.35272	0.143715	black
FFA 16:0	-0.415197	-0.256285	0.0705441	-0.0551595	0.896435	0.0643527	0.176735	-0.106754	0.0765478	0.14728	0.254597	0.240525	0.244465	tan
FFA 17:1	-0.364916	-0.452158	-0.467542	0.168856	0.268668	0.189118	0.0619137	0.409568	-0.00300188	0.213133	0.50863	0.368293	0.0915572	black
FFA 17:0	-0.258724	-0.39137	0.091182	0.0307692	0.784053	0.199625	0.243152	-0.127955	0.0677298	0.229081	-0.0564728	0.216135	0.121576	tan
FFA 18:2	-0.0791745	0.118762	-0.00637899	-0.041651	-0.162477	-0.100375	0.149343	0.067167	-0.140338	0.00375235	0.8606	0.354034	0.154784	black
FFA 18:1	-0.215572	-0.135647	-0.0714822	0.0469043	0.209756	0.035272	0.227767	0.0474672	0.0442777	0.0260788	0.902627	0.315947	0.159287	black
FFA 18:0	-0.242214	-0.307317	0.126079	-0.0409006	0.897936	0.138837	0.132458	-0.194184	-0.0577861	0.193621	-0.0433396	-0.00956848	0.0258912	tan
FFA 20:4	-0.0311445	0.2197	0.481426	-0.0133208	-0.181801	-0.0641651	0.157974	-0.420263	-0.00675422	-0.368105	0.47167	0.0120075	-0.100938	turquoise
FFA 20:3	-0.012758	0.0262664	0.0986867	0.082364	-0.306567	-0.141463	-0.175235	-0.0403377	0.150844	-0.342026	0.465103	0.0159475	-0.201501	turquoise
FFA 20:1	-0.171482	-0.238462	-0.460225	0.269606	0.109568	0.222139	-0.193433	0.613508	0.0795497	0.0919325	0.421576	0.370356	0.0774859	blue
FFA 22:6	0.0101313	0.203189	0.52439	-0.0129456	-0.271295	-0.0217636	0.154784	-0.32045	-0.0444653	-0.456285	0.374109	0.0810507	-0.152345	turquoise
FFA 22:4	0.140901	0.278612	0.425704	-0.0277674	-0.258349	0.141088	0.097561	-0.2	0.0236398	-0.285741	0.262477	0.0465291	-0.0534709	turquoise
CE 14:0	-0.242777	-0.0181989	-0.142026	0.870356	-0.113508	0.0780488	0.213884	0.0476548	0.000562852	-0.238837	0.0879925	0.0709193	-0.11257	green
CE 16:1	-0.122889	-0.218011	-0.348218	0.769043	-0.0161351	-0.0373358	0.448405	-0.00769231	-0.202064	-0.0570356	0.0547842	0.174672	-0.117448	green
CE 16:0	-0.043152	-0.163227	-0.391745	0.679362	-0.117824	-0.032833	0.201501	0.176173	-0.113508	-0.021576	-0.0667917	0.127205	-0.0234522	green
CE 18:2	-0.00225141	-0.0311445	0.236585	-0.156473	-0.177861	-0.137711	-0.447842	-0.147467	0.201501	-0.201313	-0.10469	-0.0341463	-0.119512	turquoise
CE 18:1	-0.297373	-0.374296	-0.507692	0.699812	0.117636	0.00712946	0.150844	0.314447	0.0266417	-0.0559099	0.0148218	0.272983	-0.0395872	green
CE 19:1	-0.285741	-0.278049	-0.2606	0.104878	-0.0120075	0.0757974	-0.0904315	0.322326	0.939024	0.229268	0.00994371	0.000938086	0.0198874	red
CE 20:5	0.243902	0.162477	-0.113321	0.515385	-0.136773	-0.0365854	-0.0988743	0.0457786	-0.159662	-0.257223	-0.0272045	0.0883677	-0.0639775	green
CE 20:4	0.0515947	0.128518	0.039212	0.650281	-0.30788	-0.0136961	0.0393996	-0.159662	-0.223077	-0.490432	0.0534709	0.00281426	-0.174484	green
CE 20:3	-0.28818	-0.197373	-0.365478	0.756473	0.110882	0.108068	0.0193246	0.154972	-0.210319	-0.216698	0.0780488	0.20788	-0.20863	green
CE 20:1	-0.151595	-0.24409	-0.153846	-0.380113	-0.0444653	-0.0225141	-0.245779	0.301689	0.880863	0.375422	-0.0564728	-0.0938086	0.0305816	red
CE 20:0	-0.168856	-0.245216	-0.0110694	-0.326829	0.015197	0.0150094	-0.278799	0.247655	0.892308	0.257598	-0.0966229	-0.128518	0.0849906	red
CE 22:6	-0.172233	0.114259	-0.0311445	0.605629	-0.132458	-0.0125704	-0.172795	-0.0446529	0.143715	-0.403752	0.0193246	-0.0337711	-0.446154	green
CE 23:5	-0.27955	-0.358537	-0.0742964	-0.0497186	0.0133208	0.109006	-0.193433	0.293058	0.930957	0.221013	-0.105629	0.0272045	-0.0348968	red
free	-0.0664165	-0.147092	-0.113696	0.454784	0.0594747	0.120075	-0.155347	0.0684803	0.422702	-0.140713	-0.0660413	0.189306	0.0497186	red

## Sheet: protein module membership
	MEred	MEturquoise	MEyellow	MEbrown	MEpink	MEmagenta	MEpurple	MEgreen	MEblack	MEblue	MEgrey	modules
Q8N697	0.32915	-0.273482	-0.192713	0.527935	0.2083	-0.165992	-0.399798	-0.260324	-0.187854	0.0635628	0.516802	brown
P36578	0.176923	-0.0842401	-0.129831	0.177486	0.0363977	0.0427767	-0.180113	-0.026454	-0.11182	0.0707317	0.267917	grey
Q8TDZ2	0.0803644	-0.202024	-0.473077	0.663765	0.484413	-0.174494	-0.440283	0.0522267	-0.171862	0.266599	0.543725	brown
P59768	0.255347	-0.0617261	0.613321	-0.476923	-0.546904	-0.390807	0.00168856	-0.324203	0.366792	-0.190056	-0.519325	yellow
Q9NQP4	-0.334334	-0.0739212	-0.140901	-0.279737	-0.157411	0.199812	0.149156	0.483114	0.399062	0.322514	-0.262101	blue
P02786	0.261351	0.540713	0.614071	-0.558537	-0.289118	-0.246341	0.294934	-0.298874	0.0694184	-0.560976	-0.45591	yellow
P07954	0.100375	-0.666979	-0.465854	0.133396	0.0476548	0.421951	-0.0260788	0.17561	0.581614	0.804128	0.274109	blue
Q9Y490	-0.319137	-0.386679	-0.865666	0.799812	0.473358	0.0859287	-0.524765	0.50469	0.0161351	0.686492	0.684053	green
O94826	0.208818	0.3803	0.487242	-0.355159	0.0979362	-0.249719	0.0669794	-0.407317	-0.180675	-0.43227	-0.291557	turquoise
Q96C19	0.0699812	-0.503377	-0.297561	0.00787992	-0.230957	0.407692	0.078424	0.286867	0.75985	0.653471	0.0686679	black
Q96T51	-0.510012	0.161834	-0.260532	0.252872	0.253748	0.0195864	-0.0653244	0.316337	-0.25703	-0.0366561	0.0226502	grey
P51970	-0.260225	0.909006	0.515572	-0.45591	0.160976	-0.442214	0.000938086	-0.130582	-0.503377	-0.660788	-0.484428	turquoise
O75326	-0.33621	0.231895	0.0964353	-0.2	-0.20863	0.0688555	0.121388	0.328143	0.143527	-0.0341463	-0.306754	grey
Q16853	0.301313	-0.171857	-0.13546	0.443152	0.0054409	-0.100938	-0.322326	-0.183302	0.0686679	0.0667917	0.447467	brown
O15269	0.0115385	0.319433	0.0714575	0.0374494	0.189271	-0.160324	-0.149595	-0.164575	-0.535425	-0.408704	0.104656	grey
Q7Z392	0.134897	0.309944	0.511069	-0.378612	-0.340338	-0.175797	-0.0153846	-0.247467	0.0228893	-0.342402	-0.369794	grey
P31948	-0.00187617	-0.450844	-0.302627	0.0782364	-0.211445	0.210131	-0.0878049	0.269231	0.783302	0.65985	0.082364	blue
Q13423	-0.105629	0.742777	0.305253	-0.139775	0.382927	-0.445028	-0.195497	-0.193621	-0.688368	-0.585178	-0.133771	turquoise
Q12955	-0.346717	0.354034	0.271857	-0.639775	-0.261351	0.444278	0.692308	0.3197	0.0763602	-0.252908	-0.624953	purple
Q9NV92	-0.267899	0.0177809	-0.0822665	0.143907	-0.0457563	-0.247274	-0.144618	0.133001	-0.0782361	0.0583215	-0.0644855	grey
Q9NX63	-0.235835	0.583865	0.0196998	0.0712946	0.543152	-0.379362	-0.258537	-0.0821764	-0.636398	-0.254972	0.0485929	turquoise
P20810	0.182314	-0.427454	-0.446183	0.32954	0.118065	0.103129	-0.297297	0.0891418	0.285443	0.589616	0.391655	blue
Q9NVA2	-0.00487805	-0.64803	-0.369418	0.261351	0.019137	0.327767	-0.100375	0.172045	0.63152	0.683302	0.246717	blue
Q9H2M9	0.0195122	0.465478	0.436023	-0.389306	-0.20075	-0.0801126	0.306379	-0.0846154	-0.0217636	-0.49606	-0.39606	grey
P08559	-0.327392	0.125891	-0.110131	-0.21651	0.163602	-0.0418386	-0.157598	0.375797	0.223265	0.30788	-0.251595	grey
Q99733	-0.746154	-0.065666	-0.484053	0.241651	0.203189	0.0924953	-0.169231	0.812758	0.197561	0.506754	0.00881801	green
Q8N1S5	-0.219557	0.437433	0.171276	-0.0123759	0.163636	0.0145149	0.108021	0.00534759	-0.444767	-0.508327	-0.130328	grey
P02730	0.142214	-0.0485929	0.230582	0.0273921	-0.273358	-0.0938086	-0.024015	-0.170544	-0.000938086	-0.18424	0.00581614	grey
P49006	-0.0954972	-0.550657	-0.503752	0.360788	0	0.125516	-0.231144	0.0969981	0.133583	0.56454	0.325891	blue
Q5SQI0	-0.371857	0.346529	0.315197	-0.456098	-0.162101	-0.111257	0.294371	0.127205	-0.0382739	-0.210882	-0.550844	grey
Q8IYI6	0.0217636	0.00318949	0.00206379	0.0855535	0.115947	-0.245403	-0.360038	-0.0654784	-0.030394	0.102251	0.0439024	grey
P19404	-0.253096	0.889493	0.409568	-0.414634	0.22758	-0.378799	0.0454034	-0.0166979	-0.53546	-0.607692	-0.432458	turquoise
O95336	-0.576923	-0.192495	-0.597936	0.297561	0.181989	0.268293	-0.144841	0.833959	0.224578	0.622326	0.132083	green
Q8TDX7	0.217824	0.107692	0.0294559	0.142777	0.10394	-0.149343	-0.00281426	-0.224015	-0.196811	-0.190807	0.137336	grey
P02768	0.0641651	-0.363602	-0.210694	0.212946	-0.205066	-0.139587	-0.326642	0.0833021	0.458349	0.492683	0.172983	blue
Q01813	0.21182	0.444278	0.783114	-0.760225	-0.448405	-0.139775	0.400938	-0.336023	-0.0422139	-0.661726	-0.641651	yellow
Q9NT68	0.184957	0.0304273	0.398291	-0.394872	-0.242393	-0.204103	0.223248	-0.0912821	0.431795	-0.22188	-0.357949	grey
Q9UNF0	0.197373	-0.326642	-0.278612	0.18349	0.080863	0.657786	0.411632	0.0405253	0.143715	0.157223	0.289118	magenta
Q9UBQ7	0.0317073	-0.543902	-0.521951	0.156285	-0.0915572	0.439587	-0.0726079	0.287054	0.499812	0.76454	0.263977	blue
P43304	-0.264916	0.527392	-0.0754221	0.102439	0.672983	-0.127205	-0.134897	0.0542214	-0.769418	-0.310694	0.103377	turquoise
P55060	0.708443	-0.0968105	0.473358	-0.250844	-0.316323	-0.170356	0.0245779	-0.70863	0.0373358	-0.30788	-0.0787993	red
O75061	0.0727955	0.262852	0.533208	-0.44803	-0.385741	-0.221576	0.102627	-0.039212	0.244653	-0.412758	-0.453471	yellow
P51452	-0.342964	0.149343	0.026454	-0.0789869	-0.0469043	-0.00356473	-0.00825516	0.342964	-0.00469043	-0.0356473	-0.160788	grey
Q7Z3D6	-0.0947233	-0.176062	-0.461776	0.517889	0.520463	-0.0118404	-0.406178	0.0777349	-0.172716	0.275676	0.514543	grey
Q86VP6	-0.203002	-0.520826	-0.657598	0.401501	0.225141	0.623452	0.0769231	0.573921	0.452345	0.682176	0.388368	blue
P98194	-0.225328	0.479925	0.626266	-0.520826	-0.461163	-0.492871	0.00225141	-0.0804878	-0.0397749	-0.556285	-0.658161	yellow
Q92673	-0.329644	0.507317	0.397561	-0.316323	-0.101313	-0.464353	-0.0365854	-0.0765478	-0.449531	-0.453846	-0.483302	turquoise
P78362	-0.0748593	0.0313321	-0.173734	0.224578	0.203189	0.15122	-0.0919325	0.217824	0.0778612	0.0600375	0.196811	grey
O95782	0.503377	0.0309568	0.551032	-0.427767	-0.286867	0.116323	0.515009	-0.458537	0.0913696	-0.489869	-0.272045	yellow
Q15293	-0.248405	-0.273171	-0.591182	0.742777	0.476548	-0.317448	-0.764353	0.220826	-0.120263	0.517824	0.624578	brown
P30531	-0.0187617	-0.212758	0.0879925	-0.00694184	-0.1197	0.107505	0.237711	0.012758	0.0806754	-0.0714822	-0.0938086	grey
Q8TBZ3	-0.181048	-0.173387	-0.384677	0.339113	0.214919	0.366129	0.075	0.305645	0.0572581	0.275403	0.163306	grey
P30038	0.209381	-0.764728	-0.518011	0.343715	0.172795	0.453096	-0.134897	0.0750469	0.37955	0.738274	0.501126	blue
P98196	-0.311069	0.189869	0.0489681	0.0900563	0.235084	-0.372045	-0.179737	0.117636	-0.19925	-0.13152	-0.104128	grey
Q14642	0.628518	-0.233771	0.27242	-0.0485929	-0.30075	0.0742964	0.349343	-0.426266	0.204128	-0.173171	0.0909944	red
P80723	0.260038	-0.387054	0.041651	0.0838649	-0.381238	0.00712946	0.114822	-0.190432	0.326454	0.0879925	0.1197	grey
O75569	-0.0442777	0.187054	-0.128143	0.0153846	-0.034334	0.0996248	0.036773	0.193433	-0.11576	-0.0971857	0.0363977	grey
Q8IZ83	0.240283	-0.605466	-0.613563	0.652227	0.256883	0.260121	-0.257692	-0.00728745	0.199595	0.613968	0.747976	blue
P46821	0.0750469	-0.360976	-0.157598	-0.205816	-0.30075	0.426454	0.250844	0.257974	0.795685	0.477298	-0.0727955	black
Q08211	-0.0624765	0.586116	0.562852	-0.521576	-0.233396	-0.191182	0.29212	-0.216886	-0.227017	-0.630206	-0.506567	turquoise
A0A1C7CYX9	0.234522	-0.530582	0.0474672	-0.100563	-0.512383	-0.0138837	-0.0958724	-0.0776735	0.810694	0.434897	-0.0754221	black
Q9UQ90	-0.277674	0.706754	0.286867	-0.0973734	0.322514	-0.342402	-0.0988743	-0.0247655	-0.501501	-0.41651	-0.259099	turquoise
Q9Y2A7	0.169418	-0.213696	-0.0998124	0.126079	0.107129	0.533396	0.477861	0.0581614	0.144653	-0.0120075	0.223265	grey
Q01995	0.0452158	-0.370356	-0.382739	0.321951	-0.141651	0.129081	-0.25122	0.196811	0.4197	0.476735	0.297186	grey
P20962	0.4917	-0.5917	-0.255061	0.21498	-0.104656	0.12166	-0.309717	-0.156883	0.525506	0.605466	0.352429	blue
Q01484	-0.0187617	0.266979	0.512195	-0.571107	-0.367917	0.112946	0.457223	-0.102814	-0.0313321	-0.410507	-0.606942	grey
P11586	0.079925	-0.235647	-0.537336	0.755159	0.550469	-0.0611632	-0.471482	-0.00600375	-0.327955	0.27955	0.781989	brown
P29966	-0.0594747	-0.4803	-0.310694	0.324203	-0.125516	-0.21651	-0.454597	0.0908068	0.302814	0.548968	0.242402	blue
O76041	-0.0842401	-0.603752	-0.594559	0.593621	0.18818	0.056848	-0.355722	0.198687	0.247467	0.682739	0.561726	blue
P42338	-0.262465	0.0619048	0.0319328	0.120168	0.103361	-0.182913	-0.27507	0.0596639	-0.0689076	-0.00252101	0.0585434	grey
P05023	0.190807	-0.0992495	0.181801	-0.30788	-0.244841	0.55122	0.846717	-0.115572	0.0818011	-0.212195	-0.177674	purple
O15020	0.339024	0.359475	0.614259	-0.45985	-0.284991	-0.221013	0.267917	-0.489493	-0.242964	-0.65666	-0.327017	yellow
O00408	0.478987	0.065666	0.669606	-0.337523	-0.407692	-0.47636	-0.0819887	-0.538837	0.234522	-0.340901	-0.338649	yellow
Q9UI15	-0.340338	-0.192871	-0.221951	-0.147092	-0.166792	0.366417	0.145591	0.61257	0.66848	0.467167	-0.154221	blue
P62258	-0.129456	-0.635835	-0.712195	0.526642	0.3197	0.289306	-0.285929	0.295122	0.206567	0.816698	0.520263	blue
Q6UWE0	0.518011	-0.341839	0.186304	0.0378987	-0.218011	0.0313321	0.0341463	-0.282927	0.296998	0.0590994	0.123077	grey
Q14416	-0.0694184	0.161163	0.541463	-0.505066	-0.342402	-0.0195122	0.521764	-0.0358349	0.178612	-0.362664	-0.586492	yellow
P31040	-0.246904	0.934522	0.410507	-0.300375	0.245403	-0.425328	-0.0686679	-0.0347092	-0.532458	-0.612383	-0.342777	turquoise
Q5JTZ9	-0.385366	0.386679	-0.148593	0.182364	0.581801	-0.258161	-0.186492	0.19925	-0.373358	0.0187617	0.0484053	turquoise
Q4KMQ2	-0.0637899	-0.306379	-0.57636	0.858349	0.414822	-0.110131	-0.480863	0.122702	-0.318762	0.293058	0.685553	brown
P05091	-0.0564728	-0.569981	-0.667167	0.481238	0.312008	0.184615	-0.358161	0.329268	0.409193	0.900375	0.470919	blue
P13591	0.226079	-0.306942	0.252345	-0.284615	-0.361726	0.144653	0.442402	-0.100375	0.420263	0.0806754	-0.218762	purple
Q6XQN6	0.0955466	-0.324291	-0.504049	0.617206	0.129352	0.00465587	-0.31498	0.0904858	0.0281377	0.382996	0.575911	blue
P19623	-0.605441	-0.175985	-0.520263	0.267355	0.190807	0.112758	-0.278987	0.747092	0.254409	0.605441	0.100188	green
P26006	0.0602251	-0.323077	-0.516323	0.827767	0.399062	-0.114447	-0.518949	-0.0791745	-0.256848	0.295122	0.716698	brown
A6NCS6	-0.161741	0.204251	0.287652	-0.0959514	-0.0892713	-0.148785	0.272672	-0.124696	-0.347976	-0.480364	-0.229555	grey
Q9NSD9	0.250844	0.470732	0.58818	-0.496998	-0.15197	-0.216135	0.152158	-0.226829	-0.0619137	-0.55666	-0.374672	yellow
P52758	-0.1197	-0.444653	-0.434522	0.111632	-0.0324578	0.205253	-0.228143	0.323827	0.481614	0.725516	0.190807	blue
P22732	0.0311445	-0.00450281	-0.261538	0.551782	0.35122	-0.206379	-0.367355	-0.0420263	-0.179174	0.0684803	0.522514	brown
P28838	-0.20394	-0.336585	-0.618762	0.464165	0.293621	0.0909944	-0.454597	0.290994	0.0461538	0.627955	0.417824	blue
Q8N7J2	-0.281051	-0.226266	-0.31257	0.0861163	-0.0769231	0.240525	0.102064	0.381801	0.296623	0.405629	0.0609756	grey
Q9BQ69	-0.410882	0.00637899	-0.405441	0.000187617	0.378612	0.302064	-0.0536585	0.440901	-0.0508443	0.384053	0.0198874	grey
O75369	0.242964	-0.391745	-0.44015	0.449531	0.0863039	0.0846154	-0.339024	-0.0121951	0.137523	0.378799	0.535835	brown
Q8N5M9	-0.224953	0.561726	0.224578	-0.15122	-0.0318949	-0.122702	0.158161	0.0401501	-0.385178	-0.50469	-0.197749	turquoise
Q53H12	-0.437148	0.800938	0.24878	-0.266417	0.239024	-0.326829	-0.0298311	0.197186	-0.489681	-0.396248	-0.352533	turquoise
O43795	0.157036	-0.147842	-0.0210131	0.266417	0.206004	-0.0818011	-0.242964	-0.231895	-0.211445	-0.0731707	0.243152	grey
Q9UQ80	-0.421951	-0.0322702	-0.329644	0.024015	0.0833021	0.21182	-0.115009	0.657036	0.278987	0.397749	0.00318949	green
P78371	0.625704	-0.132645	0.351595	-0.277111	-0.392495	0.054409	0.243527	-0.522514	0.218762	-0.237336	-0.0549719	grey
P36269	-0.0268293	0.0984991	-0.060788	0.337523	0.0703565	0.0103189	-0.0195122	-0.0275797	-0.394371	-0.164728	0.19212	grey
Q8NB49	-0.165789	-0.0291498	-0.337854	0.568623	0.309717	-0.0495951	-0.198381	0.199595	-0.403441	-0.0406883	0.425101	brown
Q8NFP9	-0.00525328	0.553283	0.800188	-0.689493	-0.349906	-0.264353	0.368293	-0.30394	-0.248593	-0.788555	-0.698311	yellow
Q7Z6B0	-0.217647	-0.276471	-0.267507	0.347339	0.182633	-0.146779	-0.393838	0.251541	-0.0585434	0.342577	0.314006	grey
P35232	0.240901	0.609193	0.273546	-0.0566604	0.343715	-0.353471	-0.207317	-0.375797	-0.548593	-0.464916	0.0412758	turquoise
O14744	0.357223	-0.339775	-0.120075	0.310694	0.0155722	-0.114634	-0.230206	-0.199062	0.319325	0.316323	0.335647	grey
O15083	0.119608	-0.243697	0.148179	-0.135014	-0.27563	0.162185	0.293838	0.0823529	0.445378	0.0977591	-0.080112	grey
O60645	0.224953	0.341276	0.431707	-0.192495	0.109944	-0.283302	0.0508443	-0.284428	-0.255347	-0.447655	-0.200563	grey
Q7Z3J2	-0.631144	0.564165	0.00168856	-0.0677298	0.135084	-0.0187617	0.0101313	0.527205	-0.364916	-0.294747	-0.313884	green
Q12866	-0.115877	-0.303863	-0.42729	0.492286	0.274319	0.172338	-0.230332	0.222672	-0.0786738	0.334282	0.356604	grey
P30273	0.168421	-0.340688	-0.559514	0.763563	0.430972	-0.195951	-0.617409	-0.0890688	-0.105466	0.466397	0.729352	brown
Q6PCB7	-0.381989	0.663227	0.129644	0.0198874	0.211069	-0.293621	-0.0868668	0.0377111	-0.836398	-0.558537	-0.132645	turquoise
Q14643	-0.310319	0.683677	0.350844	-0.454409	-0.136023	-0.036773	0.286492	0.277111	-0.165854	-0.47561	-0.533583	turquoise
Q15149	-0.0536585	-0.506942	-0.777674	0.613696	0.276735	0.393058	-0.198311	0.287992	0.0478424	0.610131	0.693809	brown
O43747	0.124203	0.0196998	-0.117261	0.0765478	0.177674	0.178236	0.0249531	0.126829	0.141088	0.133959	0.178612	grey
P54920	-0.629268	0.526079	0.296811	-0.549719	-0.177674	0.0587242	0.413884	0.548968	0.0384615	-0.290619	-0.737711	turquoise
Q9H115	0.128143	0.441651	0.890807	-0.821764	-0.631332	-0.323265	0.271107	-0.288743	0.181051	-0.616323	-0.807317	yellow
P09417	-0.144465	-0.244841	-0.194747	-0.243152	-0.313508	0.608443	0.357598	0.373734	0.445216	0.343527	-0.145966	black
P34897	0.0335835	-0.197749	-0.50863	0.388368	0.629456	0.0667917	-0.321388	0.0795497	-0.0816135	0.439024	0.483114	grey
O15061	-0.234615	0.044332	-0.2583	0.282996	0.167004	-0.0125506	-0.16498	0.225911	-0.222672	0.0821862	0.221053	grey
O95319	-0.136134	0.127171	0.0285714	-0.0187675	-0.187395	-0.321008	-0.259664	0.238655	0.120168	0.0254902	-0.107563	grey
Q96CW5	-0.053202	0.392118	0.035468	-0.124631	0.158128	0.0206897	0.151724	0.140394	-0.170936	-0.191133	-0.0935961	grey
Q9NRV9	-0.131895	-0.461163	-0.625891	0.322889	0.039212	0.4394	-0.121764	0.419325	0.471295	0.777298	0.380863	blue
Q6PUV4	-0.124015	0.139962	0.423827	-0.539212	-0.27561	0.0555347	0.459099	0.139024	0.294559	-0.169606	-0.591182	grey
Q14168	0.319137	0.0170732	0.289493	-0.412195	-0.315009	0.402251	0.666229	-0.206004	0.225891	-0.182364	-0.215572	purple
Q9BRX8	0.158537	0.632833	0.431332	-0.168105	-0.0435272	-0.360788	-0.00281426	-0.356473	-0.33546	-0.568105	-0.140901	turquoise
P23468	0.186782	0.213262	0.270161	-0.160302	-0.00295437	-0.14739	0.195754	-0.226174	0.136667	-0.160959	-0.167086	grey
Q96GD0	0.0609756	-0.563227	-0.260225	0.165103	-0.206754	0.0842401	-0.107505	0.142964	0.731332	0.679737	0.154034	blue
Q14318	0.0266417	0.589118	0.411632	-0.245779	-0.00168856	-0.433771	-0.0913696	-0.171482	-0.325141	-0.424953	-0.27561	turquoise
O00401	0.592982	-0.491228	-0.0964912	-0.0508772	-0.185965	0.410526	0.338596	-0.0824561	0.429825	0.382456	0.254386	grey
Q9C0C9	0.169794	-0.258537	-0.0281426	-0.112008	-0.0380863	0.489306	0.449719	0.0893058	0.401876	0.150094	-0.0181989	magenta
Q13813	-0.0801126	-0.614447	-0.512195	0.251407	0.0234522	0.518762	0.114259	0.363602	0.46848	0.653659	0.305066	blue
P07814	0.125328	0.179737	0.0157598	0.235835	0.201313	-0.186867	-0.171857	-0.237523	-0.309568	-0.266792	0.30469	grey
O14745	-0.214634	-0.384991	-0.624953	0.654221	0.293996	0.162477	-0.35985	0.296998	-0.203377	0.440713	0.536585	brown
P12821	0.453846	-0.36379	-0.116135	0.467167	0.041651	-0.306567	-0.474296	-0.362289	0.0208255	0.224765	0.447092	grey
Q9H3S7	-0.152158	-0.138462	-0.471857	0.543152	0.434146	-0.0801126	-0.518386	0.145966	-0.358349	0.191745	0.551407	brown
Q9H444	0.230206	0.170544	0.565478	-0.32758	-0.491557	-0.32045	0.0998124	-0.514071	-0.0140713	-0.427767	-0.333583	yellow
O00139	-0.0298311	0.388743	0.543902	-0.708818	-0.412008	0.0896811	0.485741	-0.00600375	0.121951	-0.412758	-0.695685	turquoise
P62851	0.476735	0.327017	0.656848	-0.478424	-0.411257	-0.388743	0.045591	-0.565291	-0.127017	-0.614447	-0.296623	yellow
Q8WZA9	0.416323	-0.294559	0.0425891	-0.0726079	-0.315009	-0.00281426	-0.0652908	-0.223077	0.588743	0.244653	0.0414634	black
P53041	-0.101501	-0.358912	0.0834897	-0.300563	-0.43227	0.338274	0.357598	0.201689	0.647092	0.27167	-0.353846	black
O95831	-0.312946	0.173546	-0.211445	0.27955	0.306754	-0.396623	-0.486116	0.260413	-0.0484053	0.210319	0.12439	grey
Q04637	0.1606	-0.043152	0.0876173	0.0660413	0.0170732	-0.14728	-0.195497	-0.244653	-0.170544	-0.0491557	0.131895	grey
Q07954	-0.0545966	0.257974	0.0923077	0.266041	0.0140713	-0.566979	-0.378799	-0.206004	-0.371857	-0.225704	0.0891182	grey
P61201	0.106191	-0.281989	-0.214071	0.0767355	0.0527205	0.274672	-0.0253283	0.192871	0.48424	0.434146	0.141276	blue
P55084	-0.105066	0.13227	-0.492308	0.53546	0.786867	0.017636	-0.344841	-0.000187617	-0.582364	0.109381	0.532458	pink
Q96GQ5	0.289306	0.417636	0.696811	-0.445779	-0.37242	-0.530582	0.041651	-0.513696	-0.103377	-0.526642	-0.450844	yellow
Q9BUF5	-0.462852	0.354597	0.12833	-0.235647	0.0382739	0.0801126	0.226829	0.445028	0.0512195	-0.120638	-0.274109	grey
O95248	-0.064728	0.595685	0.767917	-0.751782	-0.39531	-0.21576	0.391745	-0.144841	-0.0155722	-0.630206	-0.771107	yellow
P02792	-0.111069	-0.463039	-0.704315	0.66379	0.367542	0.271295	-0.269418	0.274109	0.0054409	0.597373	0.64015	brown
Q16891	-0.054409	0.680488	0.142964	-0.00863039	0.504128	-0.442402	-0.289118	-0.146529	-0.56454	-0.360788	0.00525328	turquoise
P63010	0.47561	-0.144841	0.470356	-0.454597	-0.344465	0.0741088	0.376548	-0.371107	0.384991	-0.192495	-0.312195	yellow
Q15746	0.151782	-0.446341	-0.407505	0.32833	0.0275797	0.275235	-0.0440901	-0.0577861	0.0163227	0.333583	0.488743	grey
Q96MM6	0.445028	0.0245779	0.391745	-0.0354597	-0.193433	-0.203189	0.0242026	-0.542777	-0.166604	-0.415947	-0.0255159	grey
P42765	-0.193433	-0.432083	-0.824015	0.760413	0.636023	0.202439	-0.388368	0.342964	0.0133208	0.731895	0.705629	blue
O60449	0.28083	-0.042735	-0.279609	0.385226	0.278999	0.0238095	-0.225885	-0.30525	-0.123321	0.0848596	0.51221	grey
Q13449	0.328143	-0.503565	0.116135	-0.021576	-0.30394	-0.11182	-0.00300188	-0.313321	0.409944	0.237711	0.0424015	grey
P25787	-0.172045	-0.600938	-0.663227	0.555535	0.177111	0.208818	-0.300563	0.44803	0.397186	0.799625	0.454221	blue
P07947	0.316698	-0.418386	-0.329268	0.378236	0.224203	0.196623	-0.0861163	-0.209756	-0.108068	0.18743	0.453846	grey
P26012	0.125328	0.0313321	0.0692308	-0.09606	-0.105066	0.231144	0.409568	-0.0688555	-0.00262664	-0.150094	-0.0667917	grey
P08574	-0.385178	0.852158	0.214822	-0.224015	0.407129	-0.218949	0.0506567	0.0938086	-0.618386	-0.55272	-0.250469	turquoise
Q15042	-0.453283	0.622326	0.31182	-0.277674	-0.0641651	-0.288555	0.0737336	0.239587	-0.202251	-0.474296	-0.469418	turquoise
Q9Y6E0	-0.0662289	-0.119887	-0.255159	0.278236	0.347092	-0.147655	-0.549531	0.0106942	-0.0206379	0.264353	0.306754	grey
Q9P289	0.186835	0.00784314	-0.116246	0.385154	0.228571	-0.0190476	-0.253501	-0.257423	-0.25014	-0.0560224	0.336975	brown
P07948	-0.0356473	-0.141088	-0.501126	0.769418	0.59531	-0.127017	-0.454034	0.0506567	-0.402627	0.15666	0.6606	brown
Q9Y639	0.317261	-0.0461538	0.546904	-0.392308	-0.525516	-0.0739212	0.44728	-0.34334	0.132083	-0.340901	-0.350844	yellow
P31146	-0.0474672	-0.543152	-0.314822	0.250094	-0.0238274	-0.103377	-0.438274	0.14334	0.428518	0.633021	0.263602	blue
Q92947	0.378853	-0.149834	-0.113324	0.19156	0.228781	-0.032954	-0.240635	-0.370318	0.0194405	0.184922	0.423423	grey
Q15181	-0.17167	-0.353471	-0.618199	0.36848	0.271857	0.370356	-0.0924953	0.503565	0.422889	0.673734	0.388368	blue
P11216	-0.197936	-0.55197	-0.747467	0.543715	0.328705	0.455347	-0.116886	0.50863	0.249156	0.723827	0.546341	blue
Q15120	-0.0521576	0.503377	0.286679	-0.142026	0.21576	-0.431144	-0.151407	-0.088743	-0.152158	-0.23621	-0.177486	turquoise
O00499	0.254409	-0.548968	-0.290056	0.0227017	-0.212946	0.456473	0.148593	0.206754	0.749906	0.60469	0.15197	black
Q9HCB6	0.12577	-0.345098	-0.263025	0.19944	0.0288515	0.343137	0.183193	0.0310924	0.0515406	0.14902	0.238936	grey
O94856	0.526829	-0.460225	0.176173	-0.372045	-0.352533	0.533583	0.618762	-0.381989	0.438649	0.110319	-0.0954972	purple
P37837	-0.188555	-0.542777	-0.625328	0.274296	0.0643527	0.385741	-0.111632	0.505066	0.554972	0.871482	0.279737	blue
P06132	-0.125918	0.254658	0.214003	-0.404856	-0.265951	-0.460192	-0.102202	0.160926	0.228684	0.0897798	-0.355167	grey
P04075	-0.00806754	-0.626829	-0.356473	0.139024	-0.206191	0.212008	-0.0966229	0.297373	0.838837	0.795122	0.142589	blue
P35520	0.352834	-0.567611	-0.29332	0.341903	0.0157895	0.123077	-0.283806	-0.0983806	0.435223	0.55668	0.441296	blue
Q96F07	0.425141	-0.302064	0.0135084	0.064728	-0.0150094	0.488743	0.456848	-0.21257	0.174672	-0.084803	0.23227	magenta
Q16134	-0.430769	0.77167	0.122514	-0.101689	0.32364	-0.327955	-0.184428	0.156848	-0.579174	-0.441088	-0.17561	turquoise
P62910	-0.101876	0.181614	-0.0626642	-0.00525328	0.257974	-0.0825516	-0.232833	-0.0243902	-0.262289	-0.0645403	0.0604128	grey
Q15075	-0.0908068	-0.592495	-0.59925	0.484615	0.22833	0.15122	-0.333583	0.249343	0.464728	0.783677	0.439212	blue
P19367	0.17242	0.629081	0.778424	-0.789869	-0.269981	-0.216323	0.334709	-0.295685	0.0234522	-0.605816	-0.664353	yellow
P55268	0.25122	-0.369043	-0.578799	0.528518	0.27561	0.452533	-0.0373358	0.032833	-0.00694184	0.353471	0.739587	grey
P09622	-0.240901	-0.401501	-0.556473	0.223265	0.291932	0.236398	-0.22439	0.433959	0.438274	0.823077	0.267355	blue
Q96B54	-0.197581	0.0967742	-0.0560484	0.0733871	-0.133871	-0.256855	-0.366129	0.268548	0.3875	0.269355	-0.0685484	grey
Q96A26	-0.309381	0.758349	0.385553	-0.372983	0.124953	-0.52833	-0.168293	0.0624765	-0.240713	-0.408443	-0.460038	turquoise
P35914	0.227273	-0.55336	-0.296443	0.450593	0.041502	-0.118577	-0.408103	-0.120553	0.171937	0.426877	0.409091	grey
P01023	0.0153846	-0.457411	-0.708068	0.669043	0.222514	0.2	-0.362289	0.204878	0.16379	0.622139	0.693433	blue
Q9BTW9	0.211069	0.16454	0.31576	-0.127955	-0.0924953	-0.489869	-0.355347	-0.425328	-0.232645	-0.271482	-0.118386	grey
Q9Y4F5	0.385984	-0.0273637	0.0967742	-0.150612	0.0331479	0.0447164	0.123471	-0.285428	0.0358176	0.0028921	0.0318131	grey
O00154	-0.30075	-0.287992	-0.2394	-0.134522	0.0140713	0.426642	0.244653	0.601313	0.638086	0.541276	-0.156285	black
Q96HY6	-0.202076	-0.015873	-0.372405	0.551282	0.465812	-0.278999	-0.584249	0.140415	-0.330891	0.201465	0.396215	grey
P31323	-0.108818	-0.020075	-0.0939962	-0.0133208	0.0412758	0.00318949	0.0253283	0.285741	0.384428	0.293809	-0.0178236	grey
Q9BSJ2	-0.232389	0.443725	0.319231	-0.273887	-0.113968	-0.269231	-0.0645749	0.0874494	-0.245547	-0.371255	-0.381377	grey
P13861	0.261351	-0.54803	-0.373171	0.516698	0.0587242	-0.0711069	-0.364165	-0.139587	0.23152	0.432833	0.484053	brown
O60262	-0.321951	0.127017	0.119325	-0.503752	-0.341088	0.490619	0.771295	0.368668	0.24015	-0.115009	-0.51651	purple
Q15811	-0.175422	0.429644	0.147092	0.0369606	0.260225	-0.484053	-0.259662	-0.0450281	-0.288368	-0.242026	-0.00525328	grey
P09525	0.272233	-0.340525	-0.272983	0.669794	0.0994371	-0.297186	-0.617261	-0.232083	-0.177111	0.162289	0.594747	brown
Q12959	-0.178236	-0.0778612	-0.172608	0.0551595	-0.147467	-0.080863	-0.188368	0.177861	0.3394	0.329831	-0.00150094	grey
Q08378	-0.0285425	0.343927	0.506883	-0.239879	-0.219636	-0.372874	0.133603	-0.134818	-0.202632	-0.534413	-0.389474	grey
Q96N66	-0.0183865	0.453846	0.434334	-0.315947	-0.20788	-0.545966	-0.135647	-0.238649	-0.169231	-0.401313	-0.352345	grey
O14521	0.167409	0.583401	0.357085	-0.173279	0.128947	-0.352834	-0.177733	-0.423684	-0.411336	-0.519838	-0.120243	turquoise
Q9UBV2	-0.141276	0.522326	0.426642	-0.223265	-0.106191	-0.540338	-0.067167	-0.158537	-0.259287	-0.416323	-0.345779	grey
Q9UQB3	-0.395122	0.000938086	-0.13546	-0.00487805	0.0771107	0.139962	0.322326	0.372608	-0.0930582	0.0180113	-0.101501	grey
O15484	0.00919325	-0.105066	-0.0913696	0.385178	0.230394	-0.462477	-0.397373	-0.186867	-0.317636	0.0337711	0.242589	grey
Q8N1F8	-0.0138837	0.150469	0.0514071	0.0491557	0.0577861	-0.166979	0.0484053	-0.170169	-0.153096	-0.150844	-0.0144465	grey
O15294	-0.0851782	0.605066	0.53546	-0.601313	-0.2197	0.00187617	0.45272	-0.0712946	0.0114447	-0.441463	-0.628143	turquoise
Q9HCC0	-0.416323	0.125704	-0.30863	0.338274	0.432458	-0.0120075	-0.122889	0.398311	-0.245216	0.11257	0.234522	grey
P24821	-0.141276	-0.551407	-0.67561	0.511632	0.25197	0.418762	-0.0645403	0.358161	0.104878	0.654034	0.445028	brown
Q9Y4I1	0.144278	0.565666	0.920075	-0.796623	-0.514259	-0.335647	0.350094	-0.380488	-0.103377	-0.794934	-0.801501	yellow
Q14204	-0.338274	0.564353	0.221764	-0.204128	-0.0737336	0.0322702	0.264728	0.198874	-0.41182	-0.569231	-0.313508	turquoise
P13611	-0.141651	-0.478049	-0.730019	0.502439	0.400375	0.617261	0.034334	0.361538	-0.0654784	0.524015	0.560225	blue
P02649	-0.0624765	-0.217824	-0.224015	0.193809	0.0838649	0.109193	-0.18743	0.11651	0.0570356	0.288931	0.238837	grey
Q7L266	-0.0893058	-0.504315	-0.464916	0.251782	0.0515947	0.275797	-0.0868668	0.290432	0.62045	0.724015	0.250094	blue
Q92736	-0.183865	0.710507	0.689681	-0.774296	-0.398124	-0.214822	0.419325	0.0390244	-0.0851782	-0.65122	-0.838462	turquoise
P13804	-0.00187617	-0.477298	-0.589306	0.372983	0.311445	0.285929	-0.24015	0.229644	0.411445	0.781051	0.425891	blue
P01911	0.267409	-0.226721	-0.194534	0.393522	0.107692	-0.0819838	-0.304049	-0.226923	-0.167409	0.169028	0.409109	grey
Q92599	-0.024015	-0.683677	-0.613508	0.349719	0.0512195	0.679737	0.11257	0.262664	0.372795	0.661914	0.374859	blue
P10809	-0.0153846	-0.422139	-0.668293	0.487805	0.492871	0.15591	-0.406379	0.25666	0.293433	0.759662	0.55985	blue
Q14974	0.140713	-0.397561	-0.446717	0.597561	0.356285	-0.238274	-0.716698	-0.0508443	0.021576	0.472045	0.663602	blue
P12110	0.148218	-0.387805	-0.647467	0.850844	0.466041	0.0534709	-0.452345	-0.00562852	-0.170356	0.403565	0.809944	brown
Q9NNX6	0.374585	-0.214083	-0.177809	0.452347	0.13964	-0.234471	-0.429825	-0.300616	0.0424372	0.143907	0.469891	brown
P02549	-0.0825516	-0.165478	-0.333583	0.533208	0.293996	-0.0861163	-0.378424	0.13546	-0.137523	0.227017	0.442777	grey
Q8WUM4	0.2	-0.503189	-0.545966	0.421013	0.112008	0.36848	-0.131707	0.136398	0.404128	0.596998	0.508255	blue
Q9BUT1	-0.330769	-0.325328	-0.705816	0.418386	0.360413	0.242589	-0.30075	0.511069	0.0369606	0.658537	0.375422	blue
P13716	-0.401876	-0.391932	-0.778424	0.577298	0.289306	0.244841	-0.284053	0.636961	0.177298	0.716698	0.451407	green
Q9Y4E6	0.35197	0.438462	0.942777	-0.691745	-0.518949	-0.423452	0.238649	-0.522139	0.0114447	-0.712195	-0.644653	yellow
O15197	-0.22574	0.0931789	0.0136422	-0.189447	-0.127156	0.0944659	0.22574	0.331789	0.255598	0.0259974	-0.311197	grey
Q13683	-0.122326	-0.242402	-0.647092	0.742402	0.491745	0.184615	-0.298124	0.120075	-0.428705	0.276548	0.707317	brown
P35222	-0.242026	-0.278236	-0.430582	0.189306	0.32364	0.418386	0.270919	0.333208	-0.043152	0.291745	0.182927	grey
O43301	0.109193	0.568105	0.756098	-0.849156	-0.497373	-0.0294559	0.541276	-0.223827	-0.0478424	-0.685741	-0.769043	turquoise
P06733	-0.239962	-0.582552	-0.561351	0.365478	0.0262664	0.173546	-0.313884	0.418574	0.470544	0.866229	0.282176	blue
P09104	-0.0350844	-0.397186	-0.0752345	-0.263602	-0.438274	0.414822	0.2606	0.287805	0.887617	0.521388	-0.209381	black
P00558	-0.0510319	-0.624765	-0.488931	0.164728	-0.129456	0.379174	-0.0469043	0.398124	0.750094	0.850281	0.223077	blue
P22033	-0.512195	-0.00318949	-0.724765	0.642589	0.779925	0.129456	-0.344653	0.620263	-0.316135	0.348218	0.541088	pink
Q7Z3V4	0.151108	0.138579	0.399847	-0.338732	-0.14958	-0.302368	0.00718105	-0.295034	0.101299	-0.161803	-0.347288	grey
P01024	0.0178236	-0.554034	-0.684991	0.616135	0.203002	0.329644	-0.261163	0.223827	0.15122	0.647467	0.653471	grey
P11310	0.178612	-0.585741	-0.584615	0.504128	0.385553	0.209568	-0.337899	-0.0221388	0.178612	0.679362	0.567917	blue
O94967	0.058349	0.312946	0.582927	-0.566792	-0.404503	-0.0166979	0.461163	-0.0739212	0.102627	-0.383302	-0.59137	yellow
O75955	0.0641651	0.311632	0.584428	-0.390056	-0.310882	-0.299625	0.191745	-0.0868668	0.147842	-0.446154	-0.465291	yellow
O15498	0.778987	-0.48424	0.0065666	0.0123827	-0.0866792	0.239587	0.0973734	-0.669418	0.138274	0.0966229	0.324765	red
P51649	-0.167542	-0.529081	-0.575235	0.264353	0.190619	0.282552	-0.212008	0.354409	0.472795	0.878049	0.294559	blue
P05141	-0.190244	0.854972	0.358161	-0.29531	0.27955	-0.372795	-0.0996248	-0.0161351	-0.423265	-0.523827	-0.30788	turquoise
P12235	-0.0401501	0.600938	0.418949	-0.506379	-0.0238274	-0.269981	-0.0382739	-0.0681051	-0.150657	-0.382739	-0.428143	turquoise
P04083	-0.0536585	-0.252345	-0.569418	0.877861	0.409193	-0.119887	-0.530019	0.111069	-0.376548	0.258161	0.70075	brown
P08237	0.125516	0.0148218	0.199625	-0.351407	-0.34803	0.450469	0.620638	0.0517824	0.184803	-0.231895	-0.287054	purple
P22695	-0.440525	0.85666	0.213133	-0.255535	0.416698	-0.17955	0.0275797	0.205816	-0.597186	-0.525141	-0.295685	turquoise
Q9Y4E8	0.313321	0.18349	0.366417	-0.368856	-0.329831	-0.0384615	0.308818	-0.188931	0.173734	-0.313321	-0.247655	grey
P62873	0.579737	-0.282364	0.385553	-0.249719	-0.462289	-0.0894934	0.255159	-0.465103	0.340901	-0.0572233	-0.145028	red
Q96QK1	0.410319	0.153659	0.566792	-0.442777	-0.285178	-0.102439	0.195497	-0.545216	-0.133021	-0.581426	-0.385553	yellow
O95825	0.320197	-0.298851	-0.104543	0.044335	-0.0591133	0.160372	-0.0596606	-0.0706076	0.262178	0.217296	0.221128	grey
P12111	0.15985	-0.306754	-0.580675	0.769606	0.407692	0.0921201	-0.391182	0.0326454	-0.123827	0.351032	0.730769	brown
Q9C040	-0.33227	-0.2606	-0.282176	-0.0701689	0.0617261	0.442964	0.250281	0.589869	0.448405	0.388555	-0.0814259	blue
P36915	0.15272	0.39531	0.603752	-0.371107	-0.231332	-0.228143	0.343902	-0.254972	-0.19212	-0.645403	-0.401876	yellow
P00533	0.171482	0.00356473	-0.0971857	0.390807	0.080863	-0.233396	-0.245966	-0.216323	-0.160225	-0.117073	0.317824	grey
Q6H8Q1	0.116698	0.228893	0.220826	-0.324015	-0.139212	0.0202627	0.279174	-0.0559099	0.155722	-0.160413	-0.217636	grey
P62879	0.189474	0.250607	0.673887	-0.513158	-0.504656	-0.557085	-0.00607287	-0.429555	-0.0147773	-0.434211	-0.552024	yellow
Q99536	-0.573734	-0.177861	-0.626454	0.4	0.269231	0.363977	-0.0913696	0.710694	-0.124578	0.368293	0.193433	green
P22234	0.387242	-0.772983	-0.553659	0.523827	0.209944	0.209193	-0.280488	-0.111069	0.384615	0.753659	0.633959	blue
O14964	-0.272795	-0.323452	-0.573546	0.331707	0.275235	0.244278	-0.267355	0.538462	0.295497	0.666417	0.263415	blue
P49407	-0.525516	-0.350844	-0.605066	0.362101	0.295122	0.379925	-0.0731707	0.675797	0.163977	0.519137	0.27561	blue
P29144	-0.178612	-0.337336	-0.459287	0.2197	0.167167	0.716323	0.282552	0.366979	0.200563	0.367542	0.229456	magenta
P22897	0.039212	-0.296998	-0.470732	0.678799	0.158724	-0.0964353	-0.485741	-0.00787992	-0.121201	0.283677	0.530957	brown
P49327	-0.552908	0.105441	-0.237899	-0.0574109	0.0255159	0.258912	0.0652908	0.680488	0.113884	0.165103	-0.136961	green
Q96HD1	0.203002	0.156473	0.216698	0.0204503	-0.0939962	-0.314447	-0.0836773	-0.271295	-0.0386492	-0.173734	-0.0454034	grey
P15104	0.202627	-0.304878	-0.130206	-0.0664165	-0.146529	0.58743	0.447467	0.131707	0.471295	0.290807	0.110694	magenta
Q709C8	-0.17636	-0.344653	-0.593433	0.590432	0.3606	0.23152	-0.142964	0.391932	0.158912	0.424578	0.456098	blue
Q9HAV0	0.567917	-0.26454	0.148593	0.0275797	-0.229268	-0.419137	-0.347842	-0.524203	0.0819887	0.0692308	0.179925	grey
O94819	0.164728	-0.324203	-0.150469	0.176173	0.0934334	0.25122	0.23546	-0.0560976	0.034334	0.0859287	0.226266	grey
P11717	0.159475	0.2197	0.0189493	0.311445	0.126454	-0.501126	-0.566979	-0.273734	-0.274296	-0.109381	0.293621	grey
Q9Y4G6	0.443527	-0.204315	0.233583	-0.319887	-0.323077	-0.0727955	0.0189493	-0.275985	0.517824	0.162101	-0.129268	grey
P52272	0.394184	-0.00956848	-0.00600375	0.151782	0.0981238	0.0290807	0.0378987	-0.282739	-0.0628518	-0.104128	0.233208	grey
P61247	0.772608	-0.212008	0.205441	-0.0363977	-0.250469	-0.00581614	0.0538462	-0.636585	0.091182	-0.0838649	0.27242	red
P21757	-0.0988034	-0.139145	-0.558974	0.701197	0.491966	-0.233504	-0.565812	0.107009	-0.226667	0.366154	0.596581	brown
O00533	-0.274672	-0.49531	-0.533959	0.3803	0.103189	0.165478	-0.243527	0.461163	0.477298	0.776735	0.244278	blue
P13637	0.0973734	0.113884	0.368668	-0.503565	-0.260225	0.294934	0.705253	-0.0562852	0.149156	-0.259662	-0.378424	purple
P78369	0.079925	-0.19137	0.20075	-0.097561	-0.34409	-0.215947	-0.021576	-0.178049	0.173734	-0.021576	-0.106191	grey
P61163	0.387054	-0.101126	0.326642	-0.539024	-0.530019	0.177861	0.343152	-0.165291	0.431707	-0.0442777	-0.343152	grey
P42025	-0.0206379	0.179174	0.324953	-0.518949	-0.428143	-0.00731707	0.397373	-0.0694184	0.178049	-0.212008	-0.529831	grey
P22681	0.203565	0.174672	0.37242	-0.331332	-0.259099	0.180113	0.437523	-0.20863	-0.035272	-0.507505	-0.253096	grey
O94905	-0.198499	0.529644	0.0463415	0.282739	0.35122	-0.329831	-0.220263	-0.078424	-0.683302	-0.433959	0.120638	turquoise
P08758	-0.00206379	-0.322139	-0.478799	0.762664	0.280675	-0.0941839	-0.468856	0.0461538	-0.353846	0.229081	0.593058	brown
O75477	-0.116886	0.460976	0.150281	0.243527	0.202627	-0.420263	-0.305253	-0.120638	-0.5606	-0.406942	0.0769231	turquoise
Q7Z2K8	0.187242	-0.411069	0.1	-0.0621013	-0.333959	-0.157786	-0.130206	-0.108818	0.748968	0.381238	-0.0883677	black
P23763	-0.0459662	0.334146	0.291932	-0.488931	-0.357036	0.228518	0.62758	0.00318949	-0.056848	-0.356285	-0.485929	purple
P63027	0.797749	-0.352533	0.357598	-0.16848	-0.333583	-0.133583	0.0727955	-0.706379	0.168293	-0.0833021	0.0562852	red
Q9NZM1	0.0465291	-0.0919325	-0.414447	0.736961	0.299812	-0.207692	-0.54803	-0.0219512	-0.279925	0.130957	0.594184	brown
Q99719	0.341651	-0.496998	0.130582	-0.186867	-0.355722	0.185741	0.185366	-0.0722326	0.839962	0.370732	-0.104128	black
P00441	-0.477111	-0.352908	-0.453096	0.0658537	-0.0742964	0.311069	-0.0375235	0.663977	0.556098	0.689681	-0.00619137	blue
P61764	0.185929	0.389493	0.886304	-0.870356	-0.634897	-0.188743	0.462852	-0.385553	0.160788	-0.617448	-0.793621	yellow
P61421	0.430582	0.255347	0.834146	-0.545966	-0.362477	-0.54803	0.0230769	-0.669418	-0.00337711	-0.594747	-0.456473	yellow
P11498	-0.157786	-0.131707	-0.705066	0.700188	0.885929	0.162477	-0.359662	0.244841	-0.363039	0.333959	0.753659	pink
P48739	0.168668	-0.0954972	-0.0879925	-0.0146341	0.17636	0.303002	0.281989	-0.186116	0.0253283	0.0660413	0.116886	grey
Q06830	-0.15666	-0.592308	-0.784803	0.755722	0.369981	0.144841	-0.480863	0.326454	0.140525	0.831332	0.618762	blue
P49418	0.135084	-0.435647	0.123265	-0.334334	-0.529456	0.354972	0.337336	0.0954972	0.869981	0.374672	-0.26773	black
O75781	0.636023	-0.554034	-0.00450281	0.0928705	-0.324953	-0.0577861	-0.216135	-0.304878	0.628893	0.439775	0.225704	blue
P14868	-0.0831144	0.000750469	-0.421576	0.444278	0.389306	-0.0919325	-0.428518	0.226266	-0.183114	0.160038	0.450657	grey
P35579	0.118199	-0.0249531	-0.306942	0.638837	0.339024	-0.0977486	-0.38349	-0.0941839	-0.28818	-0.00712946	0.571482	brown
O95573	-0.0318949	0.6803	0.443527	-0.5	-0.16379	-0.0560976	0.295122	-0.0673546	-0.260038	-0.60394	-0.425328	turquoise
Q8IZA0	-0.0609756	0.440338	0.526829	-0.354409	-0.201501	-0.534897	-0.0909944	-0.238837	-0.181238	-0.469418	-0.381801	grey
P61803	0.041651	0.495122	0.0131332	0.250657	0.206567	-0.200938	-0.223452	-0.155159	-0.585366	-0.410882	0.206379	turquoise
Q8NHL6	-0.0242915	-0.574696	-0.660931	0.761741	0.402429	0.0149798	-0.496964	0.144332	-0.0303644	0.53583	0.681377	brown
P35237	-0.238837	-0.115197	-0.484803	0.438274	0.245403	-0.0225141	-0.334709	0.467355	0.104878	0.397186	0.344653	grey
Q9NRA0	-0.287685	0.288177	0.029064	-0.0600985	0.142857	0.172906	0.193596	0.330542	-0.026601	-0.241872	-0.0719212	grey
R4GN18	-0.116752	-0.10581	-0.206915	0.293577	0.0876464	0.0469417	-0.0154284	0.251559	0.0497866	0.065981	0.303425	grey
Q9NRF8	-0.377193	0.045614	-0.0701754	0.168421	-0.0666667	0.00526316	0.122807	0.624561	0.119298	-0.0842105	-0.0140351	grey
P00915	-0.114259	-0.273921	-0.132833	-0.0054409	-0.377486	0.194934	0.0371482	0.342214	0.527767	0.384991	-0.0529081	blue
Q6YHK3	-0.62069	-0.154351	-0.361248	0.32786	0.178982	0.00437876	-0.170772	0.528188	-0.101806	0.277504	0.110564	grey
Q7Z6Z7	0.0442777	0.591745	0.705629	-0.507505	-0.277298	-0.393621	0.0716698	-0.293621	-0.14803	-0.642026	-0.557598	yellow
O14548	-0.22364	0.865291	0.577674	-0.534334	0.032833	-0.372233	0.124203	-0.116135	-0.367355	-0.661538	-0.556473	turquoise
Q92692	0.296761	-0.254049	-0.280567	0.469433	0.237652	-0.0477733	-0.312146	-0.29251	-0.037247	0.279555	0.561741	grey
P62241	-0.0296435	0.0358349	-0.245966	0.152533	0.225328	0.218574	-0.0737336	0.184803	-0.130394	0.127955	0.249719	grey
P62333	0.30788	-0.0457786	-0.0221388	0.131707	0.127205	0.138649	0.106942	-0.291932	-0.276923	-0.237336	0.29606	grey
P08238	-0.160413	-0.369794	-0.427767	0.140525	0.00600375	0.395497	-0.078424	0.366979	0.255347	0.466229	0.146341	blue
Q15582	0.0941204	-0.246325	-0.486486	0.770982	0.376956	-0.109294	-0.463964	-0.106686	-0.188952	0.271693	0.693694	brown
Q92743	-0.465854	0.0870544	-0.267542	0.210319	0.172233	0.398311	0.236961	0.475985	-0.183677	-0.000187617	0.0973734	grey
Q96JE9	0.0673546	-0.337711	0.0709193	-0.25272	-0.438462	0.0919325	0.11576	0.146341	0.914447	0.398124	-0.262852	black
P62269	0.109381	0.38743	0.595497	-0.448593	-0.465103	-0.314634	0.115009	-0.288931	-0.163039	-0.630394	-0.409756	yellow
Q09666	0.0168856	-0.436773	-0.521576	0.664165	0.0900563	-0.180113	-0.64878	0.124953	0.118574	0.577111	0.54015	brown
P50993	0.41182	-0.0562852	0.493246	-0.235835	-0.367917	-0.167355	0.296435	-0.458724	0.0557223	-0.393621	-0.175985	grey
P36542	-0.050469	0.816323	0.506004	-0.521951	0.106754	-0.342777	0.097561	-0.199625	-0.37167	-0.616323	-0.447092	turquoise
Q9UIB8	-0.0357786	-0.322008	-0.465637	0.585071	0.36242	-0.0329472	-0.366538	-0.0401544	-0.0947233	0.459974	0.587645	grey
Q13740	0.0485929	-0.153096	-0.0461538	0.251032	-0.00281426	-0.12833	-0.0493433	0.0307692	-0.142026	-0.0500938	0.134522	grey
Q9NZD2	0.0602251	-0.376923	-0.380488	0.0787993	-0.0097561	0.786679	0.362101	0.153096	0.0786116	0.236961	0.200375	magenta
Q6UWR7	0.127955	-0.285553	-0.346904	0.482364	0.082364	0.184991	-0.142964	0.0472795	-0.0317073	0.16454	0.392683	brown
P68036	-0.163039	-0.498124	-0.568105	0.469606	0.175985	0.164353	-0.257223	0.36454	0.41651	0.724203	0.374109	blue
Q8N1G4	-0.630019	0.433021	0.0397749	-0.16379	0.176735	-0.0846154	0.0904315	0.554972	-0.270169	-0.147467	-0.390432	turquoise
P61106	-0.0506567	-0.174672	-0.153846	0.229831	0.154221	0.365666	0.30394	0.280675	-0.0686679	-0.0551595	0.174296	grey
Q99523	-0.133208	0.369981	0.283677	-0.423452	-0.219137	-0.0405253	0.173734	0.0883677	-0.0538462	-0.212195	-0.359099	grey
P99999	0.0682927	-0.197936	0.117448	-0.500188	-0.475422	0.464728	0.403752	0.132833	0.698311	0.269606	-0.353471	black
P07900	-0.208443	-0.499062	-0.554784	0.218949	0.0876173	0.539587	0	0.478987	0.435835	0.630019	0.238649	blue
Q92888	0.0726496	-0.131868	-0.227106	0.181319	0.0494505	0.192308	-0.0976801	-0.115995	-0.0708181	0.178266	0.191697	grey
P08195	-0.299062	0.0285178	-0.0990619	0.121951	0.0928705	0.171482	0.34728	0.362664	-0.224953	-0.137336	-0.0288931	grey
O00194	0.747976	-0.353644	0.32834	-0.0947368	-0.293522	-0.247571	-0.118016	-0.634413	0.428745	0.0216599	0.05	red
P01011	-0.0909944	-0.210694	-0.171482	0.180675	-0.0819887	0.0763602	-0.133021	0.163227	0.256848	0.254972	0.109944	grey
Q13045	-0.00168856	0.216698	-0.182552	0.27242	0.358349	-0.0968105	-0.295685	-0.0133208	-0.444465	-0.0681051	0.346717	grey
P31930	-0.337523	0.897561	0.281614	-0.252908	0.35985	-0.239587	0.0636023	0.0774859	-0.583865	-0.605816	-0.294184	turquoise
Q9NSE4	-0.374109	0.28743	-0.465666	0.388368	0.885366	0.017636	-0.270169	0.348968	-0.509193	0.10075	0.366417	pink
P35580	0.218199	0.366417	0.573171	-0.246154	-0.335084	-0.340525	0.107505	-0.395497	-0.215947	-0.612946	-0.287054	yellow
Q9NZN4	0.224578	-0.240901	-0.360225	0.41651	0.0521576	0.0797373	-0.302627	-0.034334	0.0433396	0.335647	0.41257	grey
P36871	-0.0210131	-0.661163	-0.533583	0.295872	-0.110882	0.330769	-0.190056	0.266417	0.563227	0.855159	0.325891	blue
Q9GZT6	-0.0669794	0.232833	-0.189306	0.405066	0.59212	-0.349531	-0.453283	-0.106754	-0.4606	-0.0562852	0.415009	grey
Q9NPH2	-0.0427767	-0.462477	-0.603377	0.649719	0.273921	0.0138837	-0.542777	0.357786	0.17561	0.637148	0.623265	brown
Q8N111	0.0150094	0.450094	0.575047	-0.632083	-0.269231	-0.155722	0.374859	-0.249156	-0.0834897	-0.567917	-0.492495	turquoise
Q96NT5	-0.571835	0.192745	-0.305595	0.29872	0.285443	-0.115458	-0.236131	0.53651	-0.342342	0.0623518	0.027027	grey
O75891	-0.386116	-0.383302	-0.767167	0.607505	0.38424	0.278987	-0.315947	0.637711	0.213884	0.731707	0.530957	brown
P46199	-0.321849	0.29888	-0.0658263	-0.0302521	0.421008	-0.0554622	-0.054902	0.209524	-0.0955182	0.106443	-0.0957983	grey
Q15418	-0.185178	0.0590994	-0.482552	0.52439	0.59606	0.00825516	-0.19606	0.307129	-0.233771	0.206004	0.457786	grey
Q567U6	-0.0390688	-0.130972	-0.15587	0.363158	0.193522	-0.162348	-0.248583	-0.1417	-0.340486	0.0512146	0.325304	grey
Q15349	-0.0636023	-0.190056	-0.555722	0.767917	0.654034	0.00450281	-0.385366	0.0639775	-0.385929	0.241088	0.716698	pink
Q9NZN3	0.0686679	0.503189	0.85666	-0.672983	-0.482364	-0.454409	0.100563	-0.24334	0.0990619	-0.629081	-0.746341	yellow
P60880	0.260038	0.213884	0.774296	-0.773358	-0.583302	0.0587242	0.639962	-0.36379	0.180863	-0.474859	-0.67167	yellow
Q9H223	-0.184428	-0.190244	-0.579925	0.646154	0.482364	0.214822	-0.199437	0.331332	-0.260038	0.263227	0.535647	brown
P62263	0.339587	0.232645	0.54015	-0.383677	-0.352158	-0.200563	0.112008	-0.509381	-0.157036	-0.528893	-0.187242	yellow
P02787	0.0123827	-0.32833	-0.056848	-0.22364	-0.402814	0.172045	0.0249531	0.162852	0.588368	0.415009	-0.125891	blue
O14775	0.109006	0.224015	0.373546	-0.497749	-0.139212	0.226642	0.612008	-0.0825516	0.182364	-0.318199	-0.446717	purple
Q9UKS6	0.0585366	-0.179737	-0.260413	0.477486	0.229831	0.0840525	-0.0643527	-0.0953096	-0.307505	0.00562852	0.398499	brown
Q8NE62	-0.17561	0.0512195	-0.509756	0.573734	0.786679	-0.0125704	-0.276923	0.124203	-0.512008	0.104503	0.552158	pink
Q66K14	-0.325516	0.0371482	-0.628518	0.651782	0.644278	-0.115009	-0.454784	0.336585	-0.342777	0.25272	0.536773	pink
P08582	-0.0363977	-0.260788	-0.359287	0.487992	0.407129	0.0733583	-0.141651	0.0536585	-0.134522	0.272795	0.40469	grey
P43686	-0.140901	0.30788	0.210507	0.0181989	0.067167	-0.241839	0.036773	-0.170544	-0.401313	-0.439775	-0.143152	grey
Q9UHD8	0.203002	-0.672795	-0.588931	0.502627	0.214822	0.350657	-0.164165	0.115572	0.428518	0.764165	0.558912	blue
Q15019	-0.137336	-0.634334	-0.787054	0.614447	0.353096	0.379925	-0.261538	0.354784	0.246904	0.839587	0.57636	blue
Q16181	0.249343	-0.760976	-0.448218	0.260976	-0.0643527	0.566229	0.088743	0.0307692	0.56379	0.677674	0.375047	blue
O43236	0.0189493	-0.503752	-0.379925	0.0508443	-0.0409006	0.891745	0.496623	0.211632	0.344465	0.40788	0.157223	magenta
Q9UH03	0.297936	-0.600563	-0.0405253	-0.0572233	-0.163602	0.389118	0.177861	-0.113508	0.533771	0.371107	0.0688555	blue
P84090	-0.167355	-0.2	-0.31182	0.116323	-0.0789869	0.265103	0.113508	0.257036	0.0461538	0.253846	0.139024	grey
P08575	-0.189118	-0.107505	-0.571482	0.797749	0.487242	-0.087242	-0.52439	0.196811	-0.416135	0.205066	0.609944	brown
Q9P2R3	-0.455159	-0.14015	-0.770732	0.619325	0.531144	0.27242	-0.235835	0.523452	-0.343902	0.359099	0.524953	brown
Q01814	-0.0223265	0.177861	0.352345	-0.457786	-0.213696	0.249719	0.752533	-0.0634146	-0.0712946	-0.360225	-0.401313	purple
A6NE02	0.105602	0.297479	0.301961	-0.109524	0.12381	-0.12493	0.0859944	-0.306443	-0.417367	-0.422969	-0.0904762	grey
Q9NQX3	0.0153846	-0.386304	-0.342964	0.112383	0.0213884	0.262664	0.0382739	0.154034	0.387992	0.620638	0.14334	blue
Q92542	0.582364	-0.179737	0.147092	-0.0375235	-0.0803002	0.0596623	0.124578	-0.532458	-0.0375235	-0.209381	0.147655	grey
P04040	-0.265854	-0.458912	-0.52364	0.363039	0.0131332	0.219887	-0.233583	0.42364	0.418949	0.781801	0.236773	blue
P11137	-0.00469043	-0.0318949	0.403189	-0.391557	-0.478424	-0.389118	-0.139587	-0.0917448	0.494371	-0.00562852	-0.419137	black
Q5T5Y3	0.331282	0.163761	0.333333	-0.230769	-0.180171	-0.37094	-0.0673504	-0.345641	-0.13641	-0.211624	-0.146667	grey
Q9Y216	0.0728402	0.385658	0.120271	-0.079616	0.228684	-0.130435	0.298701	0.00169396	-0.404856	-0.498588	-0.17109	grey
O15439	-0.165478	0.138274	-0.271295	0.505816	0.276735	-0.0166979	-0.111445	0.199437	-0.380863	-0.159099	0.341651	brown
Q9UHJ6	-0.183512	-0.174478	0.0355731	-0.127047	0.0254094	-0.0186335	0.115754	0.172219	0.443252	0.17109	-0.165443	grey
O60220	-0.63546	0.175047	-0.277298	-0.0114447	0.327205	0.219512	0.080863	0.527767	-0.130769	0.184803	-0.122889	turquoise
O95081	-0.0834897	-0.0326454	-0.228705	0.462852	0.337148	-0.286304	-0.370732	0.0776735	-0.263415	0.095122	0.298499	grey
Q7Z406	-0.00769231	0.180113	0.324953	-0.252158	-0.309006	0.185741	0.565666	-0.160225	-0.146154	-0.383302	-0.348218	grey
O43149	-0.054409	0.152908	-0.246154	0.160225	0.249906	0.0373358	-0.161726	0.121013	-0.272233	-0.0570356	0.275985	grey
Q02952	-0.0801126	-0.442402	-0.339212	0.342026	-0.139775	-0.0857411	-0.409006	0.235835	0.519512	0.612758	0.209944	blue
P04264	0.283401	-0.238057	-0.110931	0.170243	0.247571	-0.0888664	-0.224291	-0.216802	0.059919	0.134211	0.347976	grey
P49411	-0.354597	0.662852	0.0337711	-0.112946	0.611632	-0.122889	-0.0266417	0.154972	-0.538274	-0.27167	-0.107692	turquoise
O95671	-0.239587	0.104315	0.167917	-0.138086	-0.275797	-0.294934	-0.0981238	0.0243902	-0.00637899	-0.0195122	-0.32364	grey
Q969T9	-0.27955	-0.117073	-0.421951	0.3394	0.311069	0.0225141	-0.287242	0.362289	-0.0268293	0.401501	0.259099	grey
Q9Y4L1	-0.19137	-0.0424015	-0.310694	0.202814	0.139212	-0.153846	-0.494371	0.26379	0.173171	0.407692	0.237899	grey
P25686	0.0277674	-0.198499	0.171295	-0.129456	-0.210131	-0.14803	0.0230769	-0.183677	0.0673546	-0.0602251	-0.112946	grey
Q9NVT9	0.530346	-0.391181	-0.343765	0.470128	0.171408	0.0104315	-0.293978	-0.267899	0.0713608	0.348269	0.67615	red
P23229	0.178049	-0.205629	-0.243527	0.534146	0.214071	0.00281426	-0.126454	-0.217261	-0.27167	0.0463415	0.475235	brown
Q14624	-0.020075	-0.278424	-0.503002	0.521764	0.273921	0.0538462	-0.348593	0.200375	0.19137	0.492871	0.519887	grey
Q9UHG2	0.00694184	-0.206004	0.239775	-0.366604	-0.498874	-0.0318949	0.153471	0.0454034	0.672233	0.175422	-0.433583	black
P08514	0.0623482	0.0313765	-0.181984	0.401012	0.223887	-0.0497976	-0.122267	0.0607287	-0.0348178	0.0131579	0.328138	grey
P14543	0.25666	-0.21651	-0.244278	0.299437	0.0277674	0.276173	0.110319	-0.0932458	0.0121951	0.0478424	0.451407	grey
P13796	-0.531532	-0.0952381	-0.562934	0.43964	0.369112	0.0931789	-0.183784	0.559073	0.0136422	0.498842	0.262806	blue
P48163	0.382552	-0.785366	-0.310694	0.217073	-0.121951	0.176735	-0.196248	-0.193621	0.567355	0.650094	0.352158	blue
P17677	0.11576	-0.318574	0.2	-0.149531	-0.482176	-0.218199	-0.0598499	-0.04803	0.615385	0.197749	-0.196998	black
P07355	0.317636	-0.30394	-0.272608	0.691932	0.212008	-0.245779	-0.550281	-0.317824	-0.343527	0.0879925	0.635084	brown
Q9BSJ8	-0.209568	0.463039	0.152908	-0.203002	-0.0277674	0.208255	0.365103	0.080863	-0.477486	-0.541088	-0.280488	turquoise
Q9Y6G9	-0.230769	0.476923	0.33152	-0.181614	0.0181989	-0.168856	0.141651	0.152908	-0.297373	-0.554972	-0.273546	grey
O75116	0.247655	-0.354409	0.00469043	-0.112758	-0.222139	0.0281426	-0.0722326	-0.0926829	0.666417	0.370169	-0.0155722	black
Q9HBH5	0.626642	0.088743	0.467355	-0.210319	-0.140713	-0.134897	0.10075	-0.712195	-0.163039	-0.455159	-0.0986867	yellow
Q13214	-0.0474158	-0.302987	-0.500711	0.623281	0.199384	-0.0694642	-0.320531	0.108582	-0.221669	0.224277	0.586297	grey
Q9NY72	-0.0628518	0.473171	0.735272	-0.694184	-0.430582	-0.313321	0.190244	-0.0849906	0.17636	-0.492495	-0.782364	yellow
A0A7P0T936	0.143117	-0.179757	0.329352	-0.493117	-0.570243	-0.00890688	0.207287	-0.061336	0.592105	0.092915	-0.434211	black
P27824	-0.449719	0.761726	0.301126	-0.0654784	0.0819887	-0.462101	-0.147655	0.106567	-0.602439	-0.569981	-0.3	turquoise
P11234	0.545028	-0.275985	0.0236398	0.139587	-0.0705441	0.11257	0.141651	-0.379925	-0.00525328	0.00881801	0.253096	grey
O95294	0.304503	0.079925	0.572233	-0.236773	-0.299437	-0.673921	-0.248593	-0.557974	0.0521576	-0.312195	-0.266041	yellow
Q9UJU6	0.132458	-0.525704	-0.589118	0.419887	0.179737	0.24409	-0.247092	0.153283	0.163415	0.617073	0.506754	blue
P36543	0.341651	0.305441	0.945779	-0.758912	-0.579925	-0.290619	0.346341	-0.524203	0.168668	-0.614259	-0.682927	yellow
Q8N0X7	0.409756	-0.32364	-0.16773	0.478799	0.15122	-0.415572	-0.604315	-0.343152	-0.0183865	0.22439	0.593246	grey
P62913	0.113696	0.56773	0.765291	-0.554221	-0.469981	-0.467917	0.0829268	-0.38818	-0.257786	-0.769418	-0.540901	yellow
Q8IWT1	0.502801	-0.217367	-0.0294118	0.0159664	-0.00952381	0.518487	0.438936	-0.215686	0.177591	0.0652661	0.30028	grey
Q14257	0.400563	-0.249531	-0.239962	0.319325	0.249156	-0.217824	-0.525704	-0.399812	-0.0380863	0.264916	0.56454	grey
O00429	-0.0166979	0.359475	0.736023	-0.837711	-0.543152	-0.0619137	0.501313	-0.14015	0.257411	-0.497936	-0.851407	yellow
Q96TC7	-0.26773	-0.270544	-0.682364	0.464165	0.539587	0.402439	-0.0660413	0.449531	0.00731707	0.514634	0.470919	brown
P53816	0.054386	-0.370175	-0.382456	-0.0350877	0.0596491	0.649123	0.352632	0.170175	0.459649	0.485965	0.2	grey
Q9HCJ6	0.594747	-0.56454	0.214822	-0.0347092	-0.359287	-0.187805	-0.177674	-0.551595	0.427767	0.138649	0.0977486	red
Q8NBN3	0.296435	0.323077	0.72364	-0.540713	-0.546154	-0.302814	0.158912	-0.421201	-0.0345216	-0.532458	-0.503002	yellow
Q9BWH2	-0.119325	0.61576	0.3	-0.201876	0.25666	-0.320638	-0.0290807	-0.116323	-0.445403	-0.473546	-0.264916	turquoise
Q5T0F9	0.224348	0.31913	0.143478	-0.182609	0.0443478	-0.224348	-0.253913	-0.224348	-0.0295652	-0.124348	0.0721739	grey
P52565	-0.431332	-0.33227	-0.404128	0.135835	-0.0255159	0.269981	-0.108818	0.591745	0.529831	0.613321	0.0435272	blue
Q9UHY7	-0.644653	-0.193809	-0.611069	0.275797	0.244841	0.330582	-0.0577861	0.86379	0.225141	0.612008	0.121388	green
O95487	0.160788	0.393058	0.302814	-0.31651	-0.0332083	0.0467167	0.342402	-0.148968	-0.0442777	-0.357786	-0.244841	grey
Q9H4A4	-0.526642	-0.276548	-0.757411	0.681051	0.464728	0.130769	-0.373921	0.625141	-0.0459662	0.545591	0.473358	green
Q9UKU0	-0.226079	0.887617	0.525704	-0.44334	-0.0459662	-0.312383	0.202064	-0.0373358	-0.401689	-0.738462	-0.525516	turquoise
P0C0L5	0.0283302	-0.288743	-0.570544	0.767167	0.434897	-0.0258912	-0.424953	0.0272045	-0.269043	0.283302	0.657786	brown
O95219	-0.0804878	0.184991	0.511445	-0.388743	-0.278236	-0.306191	0.165103	-0.0686679	0.0266417	-0.405066	-0.508818	yellow
Q9UBB4	0.431895	-0.241839	0.203377	-0.377861	-0.278049	0.363039	0.366604	-0.278236	0.431707	0.0313321	-0.224578	grey
P16219	-0.217448	-0.386304	-0.681614	0.372983	0.514447	0.399625	-0.0891182	0.401689	0	0.600938	0.424203	blue
P67936	0.0208255	-0.52833	-0.437711	0.153471	-0.0652908	0.354597	-0.101313	0.17242	0.54015	0.682364	0.245216	blue
P78559	-0.0699812	-0.232458	0.0185741	-0.346154	-0.395872	0.375422	0.339587	0.333021	0.830394	0.357974	-0.28743	black
Q9H1K4	-0.317261	0.322326	-0.288931	0.430394	0.681989	-0.1	-0.207129	0.134334	-0.64878	-0.158912	0.302439	pink
P51608	-0.160225	-0.494747	-0.71576	0.544278	0.420638	0.258724	-0.253283	0.262289	0.224765	0.726454	0.496623	blue
Q9UDR5	-0.255013	-0.174799	-0.549799	0.570856	0.419786	-0.040107	-0.404078	0.133021	-0.0544786	0.429813	0.481618	brown
P18433	-0.0941839	-0.492683	-0.554972	0.685741	0.278612	0.0378987	-0.387805	0.269981	0.0170732	0.513884	0.501501	brown
Q9BX68	0.256098	-0.697373	-0.582739	0.3606	0.158724	0.381426	-0.137711	0.0377111	0.418199	0.742964	0.540525	blue
Q562E7	0.228745	-0.292915	-0.290486	0.480972	0.22166	-0.0544534	-0.362753	-0.230972	-0.0236842	0.258704	0.582389	grey
P23469	-0.734334	0.191745	-0.374859	0.23621	0.263602	0.139775	-0.0467167	0.69606	-0.0924953	0.11651	-0.0210131	green
P21333	-0.0097561	-0.508255	-0.705441	0.831144	0.278987	0.0424015	-0.538274	0.169418	-0.0288931	0.514634	0.767917	brown
Q9NVI7	-0.119887	0.586867	0.0797373	-0.0155722	0.534709	-0.241651	-0.217824	-0.127767	-0.668856	-0.33227	0.0446529	turquoise
P14618	-0.0150094	-0.671107	-0.566229	0.331895	0.00300188	0.296248	-0.185741	0.329644	0.719512	0.911632	0.356285	blue
Q9NZB2	0.405066	0.258537	0.404503	-0.0763602	0.0307692	-0.325328	-0.0345216	-0.56773	-0.286304	-0.549343	-0.0144465	grey
P14854	-0.0242026	0.82833	0.477111	-0.473171	0.0054409	-0.241839	0.178236	-0.088743	-0.29925	-0.571295	-0.424015	turquoise
O14617	0.13227	0.375797	0.635647	-0.470169	-0.282552	-0.400938	0.0405253	-0.245028	0.151782	-0.408443	-0.54015	yellow
P26639	-0.161163	-0.534897	-0.587242	0.493621	0.264353	0.110507	-0.400188	0.369981	0.395497	0.801501	0.461726	blue
Q99805	0.157598	0.429456	0.478424	-0.187805	-0.164165	-0.536585	-0.216886	-0.331144	-0.26379	-0.451595	-0.187242	grey
Q16653	0.155347	-0.306754	-0.189118	-0.0778612	-0.0273921	0.880675	0.660976	0.0868668	0.277486	0.193996	0.0709193	magenta
Q92752	-0.1197	-0.459099	-0.381614	0.049531	0.0403377	0.683865	0.454034	0.377861	0.353283	0.485178	0.104315	blue
P16615	0.168293	0.64015	0.750094	-0.709193	-0.448968	-0.202064	0.394559	-0.380488	-0.247467	-0.799625	-0.64334	turquoise
O15066	-0.303189	0.620826	0.522514	-0.493996	-0.161163	-0.33621	0.0836773	0.121388	-0.0641651	-0.433959	-0.563039	turquoise
Q9BRG1	0.374296	0.0733583	0.356473	-0.106379	-0.262101	-0.286679	0.0106942	-0.465291	0.100188	-0.162852	-0.0797373	grey
O14578	0.298499	0.191932	0.621576	-0.586492	-0.347092	0.0793621	0.530019	-0.367542	-0.0255159	-0.585553	-0.461351	yellow
Q14203	-0.159099	-0.322702	-0.32758	-0.0793621	-0.182552	0.365291	0.102251	0.475422	0.565103	0.58424	-0.0193246	blue
Q6ZT21	-0.39413	0.518826	0.111943	-0.112348	0.12753	0.0455466	0.048583	0.396154	-0.335223	-0.368421	-0.188664	turquoise
Q9UBF2	0.0156472	-0.0853485	-0.415837	0.528924	0.421764	-0.0877193	-0.438359	0.0656709	-0.228781	0.245851	0.435752	grey
Q9H2G2	0.245028	0.0275797	0.340713	-0.0919325	-0.178799	-0.20394	0.043152	-0.35122	-0.0636023	-0.211445	-0.205441	grey
P23246	0.0557223	-0.121764	0.0225141	-0.00469043	0.171295	-0.0213884	0.0196998	-0.0714822	0.0318949	0.0418386	0.108255	grey
Q16204	0.393246	-0.490244	-0.358537	0.556848	0.210131	-0.0752345	-0.372795	-0.248218	0.126266	0.409568	0.645966	grey
Q01082	0.0771107	-0.693058	-0.540713	0.293621	0.0969981	0.704878	0.21651	0.240713	0.290994	0.544465	0.402814	blue
Q9UNQ0	0.218199	-0.250094	-0.23227	0.284428	0.178799	0.292871	0.15666	-0.0388368	0.117824	0.0949343	0.388368	grey
P15924	0.283198	-0.0740891	-0.115992	0.290486	0.108907	-0.0437247	-0.249393	-0.102632	0.0255061	0.114777	0.300607	grey
P23396	0.35985	0.380488	0.712383	-0.514259	-0.465478	-0.313133	0.14334	-0.517636	-0.178424	-0.709193	-0.38424	yellow
Q86UW8	0.174696	0.147773	0.047166	-0.222672	-0.105466	0.552227	0.592105	-0.134615	-0.0336032	-0.263563	-0.0712551	purple
O00231	-0.45122	0.574859	0.457786	-0.403189	-0.222702	-0.136398	0.299062	0.216886	-0.253471	-0.558724	-0.65591	turquoise
P33121	-0.403377	0.61182	0.0515947	-0.0114447	0.190994	-0.0863039	0.0953096	0.256098	-0.377298	-0.376923	-0.179737	turquoise
A0A1B0GTW6	-0.462806	0.0954955	-0.343115	0.221107	0.256371	0.0177606	-0.00875161	0.470528	-0.140798	0.0882883	0.122008	grey
Q9UPN3	-0.00525328	-0.325704	-0.41576	0.443902	0.210507	0.251595	-0.121951	0.0232645	-0.219325	0.312195	0.377111	grey
Q9H008	0.0782364	-0.578236	-0.566979	0.517636	0.0763602	-0.00562852	-0.508818	0.1803	0.339775	0.791182	0.497561	blue
Q02252	-0.119137	-0.437523	-0.823827	0.641839	0.603189	0.343715	-0.325328	0.452345	0.163227	0.738274	0.694747	brown
P35749	-0.0654784	0.134709	-0.0590994	0.171482	-0.0879925	-0.0996248	-0.211445	0.0461538	-0.0752345	-0.0966229	0.104503	grey
Q9BPU6	-0.190056	-0.467355	-0.310882	-0.0722326	-0.204315	0.457223	0.206567	0.433021	0.75985	0.657036	-0.0592871	blue
P57087	-0.0348968	-0.0121951	-0.0234522	0.232833	0.0771107	-0.00187617	0.0778612	-0.161726	-0.318011	-0.173171	0.190807	grey
P61601	-0.312383	0.260788	0.276173	-0.52758	-0.322702	0.24878	0.500188	0.394371	0.34334	-0.114822	-0.625891	turquoise
P14136	0.15666	-0.446154	-0.494371	0.601689	0.300563	0.241839	-0.158537	-0.180675	-0.30788	0.277674	0.630206	grey
P59998	-0.29925	-0.44409	-0.54878	0.287617	0.230769	0.394934	0.0660413	0.5394	0.315197	0.622139	0.280113	blue
Q92544	0.584991	0.27167	0.614259	-0.349343	-0.416698	-0.342214	-0.00393996	-0.657036	-0.0816135	-0.485553	-0.225328	yellow
P42704	-0.36773	0.430206	-0.139212	-0.0116323	0.624953	-0.0594747	-0.103377	0.190994	-0.484428	-0.088743	0.0348968	turquoise
P51572	0.141088	0.323452	0.337711	-0.0189493	-0.207692	-0.459287	-0.166229	-0.290244	-0.291557	-0.421951	-0.0487805	turquoise
Q96T17	0.688546	-0.0903475	0.447619	-0.0720721	-0.334106	-0.198198	0.019305	-0.769627	0.177349	-0.230888	0.0162162	red
P46459	0.0984991	0.546341	0.767542	-0.817261	-0.368668	-0.131144	0.485553	-0.23546	-0.0742964	-0.693246	-0.746717	yellow
P30519	0.264165	0.217636	0.178987	-0.231707	0.0170732	0.209006	0.412195	-0.110319	0.0138837	-0.199062	-0.0842401	grey
P22314	-0.252345	-0.39212	-0.431144	0.162101	0.0701689	0.26773	-0.0857411	0.488931	0.286304	0.563039	0.173358	blue
P14649	0.377674	0.0881801	0.32045	-0.118199	-0.0493433	-0.262101	0.0208255	-0.4803	-0.224015	-0.39137	-0.0429644	grey
A0A1B0GW05	-0.37166	0.572672	0.0813765	0.0475708	0.310121	-0.307287	-0.169838	0.0133603	-0.637854	-0.405466	-0.108704	turquoise
P04114	0.0401501	-0.274672	-0.509568	0.649531	0.261914	0.145779	-0.167542	0.106004	-0.0992495	0.305629	0.680113	brown
Q9Y6N5	-0.228705	0.331332	-0.201501	0.405441	0.389869	-0.344653	-0.474484	0.245028	-0.321388	-0.0287054	0.232833	grey
Q9UPA5	0.0341463	0.0643527	0.364165	-0.437148	-0.279362	-0.171857	0.0499062	-0.0917448	0.534709	0.0294559	-0.401313	black
Q96K76	-0.231579	0.366802	-0.0730769	0.239879	0.431984	-0.289474	-0.157895	0.118826	-0.401822	-0.169231	0.0755061	grey
Q9BZ29	0.578799	0.0679174	0.471295	-0.464165	-0.412383	0.123827	0.475235	-0.533959	0.231144	-0.316135	-0.270919	grey
Q12965	-0.221764	-0.18818	-0.628705	0.554784	0.416698	0.384428	-0.0358349	0.281614	-0.227767	0.252158	0.546904	brown
Q02218	-0.398499	0.226079	-0.301689	0.0553471	0.510882	-0.0624765	-0.275422	0.474109	0.0120075	0.343152	0.000938086	pink
Q9UJZ1	-0.466979	0.621201	-0.0825516	0.22045	0.456848	-0.395685	-0.381614	0.104315	-0.709756	-0.294934	0.0968105	turquoise
Q9Y6A2	-0.075	0.412903	0.104435	-0.247177	0.268952	0.000806452	0.166129	0.0693548	-0.216935	-0.219758	-0.224194	turquoise
Q9UDY2	0.252158	-0.53546	-0.521764	0.480863	0.195497	0.319887	-0.0932458	-0.13227	0.0322702	0.49925	0.640338	grey
Q13586	0.0305816	0.0772983	-0.36454	0.570919	0.617448	-0.19531	-0.40788	-0.020075	-0.33546	0.0782364	0.513696	grey
Q96DB5	0.0983269	-0.19897	-0.114028	0.0471042	0.0427284	0.34749	0.292407	-0.000772201	-0.171429	0.0453024	0.0815959	grey
P11233	-0.120075	-0.0043152	0.133396	-0.260225	-0.319325	0.424015	0.643152	0.190807	0.117824	-0.165291	-0.296811	purple
O75410	0.257786	-0.489681	-0.57167	0.578612	0.271295	0.358161	-0.184615	-0.0508443	0.0786116	0.53621	0.712195	grey
O95674	0.174109	0.221951	0.358161	-0.133396	-0.137899	-0.439587	-0.259662	-0.314259	-0.0350844	-0.231332	-0.0968105	grey
Q9NQC3	0.115385	-0.397561	-0.172233	-0.142214	-0.253283	0.405629	0.228518	0.1394	0.516135	0.421013	-0.0287054	black
Q92581	0.157974	0.530957	0.842026	-0.643902	-0.488743	-0.38818	0.306567	-0.446904	-0.0780488	-0.707317	-0.6606	yellow
Q15437	-0.197724	0.173433	0.117409	-0.151111	0.0434402	0.139731	0.278477	0.136667	-0.151986	-0.245651	-0.157019	grey
P34932	-0.0358349	-0.598311	-0.603002	0.301876	0.0866792	0.393996	-0.141463	0.396811	0.694184	0.893996	0.356473	blue
Q9Y4F1	0.15666	0.171107	0.319887	-0.141088	-0.203752	-0.230769	0.147842	-0.321013	-0.259099	-0.378987	-0.139775	grey
P13798	0.305066	-0.609193	-0.502064	0.421951	0.129456	0.165291	-0.333021	0.0709193	0.584615	0.75272	0.525704	blue
P22830	0.193621	0.316886	0.433583	-0.484615	-0.0418386	-0.0401501	0.293058	-0.393996	-0.252158	-0.414634	-0.322139	grey
P13797	-0.446717	-0.119325	-0.533021	0.133583	0.109381	0.436773	0.130019	0.726266	0.400938	0.533021	0.049531	green
Q9Y6G5	0.0771757	-0.277504	-0.182266	0.187739	0.135742	-0.045977	-0.293924	0.10509	0.243569	0.427477	0.194308	grey
Q13098	0.515947	-0.384428	0.0144465	-0.0397749	-0.169606	0.0774859	-0.0502814	-0.2394	0.52045	0.26379	0.145403	red
Q9BWS9	0.197561	-0.198687	-0.12833	0.281989	0.189118	-0.152908	-0.241839	-0.0422139	0.190056	0.169981	0.321013	grey
P13645	0.189676	-0.277935	-0.167814	0.191903	0.3	-0.062753	-0.18664	-0.149595	0.0123482	0.186235	0.32996	grey
Q15436	0.073546	0.397749	0.642964	-0.420638	-0.489118	-0.340338	0.163227	-0.304878	-0.195685	-0.630582	-0.483865	yellow
Q15334	-0.274859	-0.0469043	-0.368856	0.149156	0.172983	0.393809	0.346341	0.397373	-0.220075	0.142777	0.107129	grey
Q92823	0.015197	-0.614071	-0.342964	0.283677	0.0549719	-0.000750469	-0.264353	0.0731707	0.359099	0.610319	0.241839	blue
P07197	-0.0242026	0.393621	0.395685	-0.584803	-0.413321	0.405066	0.626266	0.0281426	0.0311445	-0.417073	-0.514634	turquoise
Q14571	-0.0125704	0.643152	0.410882	-0.238462	-0.0624765	-0.270919	0.136023	-0.263977	-0.592683	-0.675985	-0.263977	turquoise
Q7L1Q6	-0.12364	-0.171482	-0.527392	0.425891	0.626454	0.0562852	-0.302627	0.195872	-0.318762	0.287054	0.475047	grey
P09972	0.122514	-0.689306	-0.448968	0.333771	-0.0577861	0.174109	-0.234334	0.0834897	0.623452	0.815009	0.36379	blue
Q9H3K2	-0.051417	0.334615	0.117409	0.0939271	0.379352	-0.299595	-0.199393	-0.243117	-0.488057	-0.338664	0.0712551	grey
Q13303	0.0499062	-0.0652908	-0.184991	0.108818	0.194184	0.600938	0.590619	0.157786	-0.0206379	-0.0185741	0.170732	purple
Q00059	-0.0272045	0.2197	-0.0110694	-0.00262664	0.375985	-0.210882	-0.219137	-0.157223	-0.345966	-0.056848	0.0840525	grey
Q9UQ16	-0.112758	0.477111	0.474296	-0.657223	-0.375235	0.163977	0.540901	0.162477	0.0602251	-0.448405	-0.683302	turquoise
P30084	-0.424015	-0.402064	-0.673921	0.301876	0.327767	0.275985	-0.201501	0.642964	0.430394	0.837899	0.240901	blue
P35241	0.0202627	-0.538086	-0.649156	0.59606	0.397373	0.434146	-0.119325	0.180675	0.15591	0.63621	0.579362	brown
Q86WU2	0.160526	0.0336032	-0.265789	0.341498	0.571053	-0.0797571	-0.309919	-0.0732794	-0.27004	0.18502	0.430364	grey
Q14166	-0.554597	0.409006	-0.0836773	0.0322702	0.18349	-0.0333959	-0.030394	0.471295	-0.301126	-0.210131	-0.129831	turquoise
Q15366	-0.268856	0.0121951	0.0110694	-0.381238	-0.0594747	0.494184	0.462852	0.198311	0.14409	0.0270169	-0.2803	grey
Q6UX07	-0.406073	0.665992	0.219231	-0.119636	0.00384615	-0.256478	0.0380567	0.0991903	-0.475911	-0.476316	-0.289271	turquoise
O95373	0.187617	-0.375797	-0.369043	0.344653	0.211069	0.254784	-0.0896811	0.131895	0.326642	0.384991	0.445216	grey
Q684P5	0.701501	-0.155535	0.402439	-0.291557	-0.429268	-0.0318949	0.129644	-0.619887	0.196248	-0.206754	-0.0508443	red
Q7Z460	0.139212	0.324015	0.130019	-0.291182	0.0863039	0.362289	0.557036	-0.05197	-0.00731707	-0.300563	-0.202064	purple
Q8TD55	0.603036	-0.152024	0.210121	0.123279	0.0315789	-0.220445	-0.0834008	-0.668826	-0.103846	-0.218016	0.188462	red
Q9Y3D9	-0.406062	0.278696	-0.212386	0.113689	0.553781	0.106686	-0.0447533	0.413721	-0.142576	0.0802057	0.0355619	pink
Q8N9F7	0.0947467	0.554034	0.541463	-0.352908	-0.148968	-0.294184	0.192683	-0.280113	-0.318199	-0.600938	-0.365854	turquoise
O96000	-0.278987	0.900375	0.438837	-0.345591	0.221013	-0.463039	-0.00581614	-0.036773	-0.466979	-0.588368	-0.412383	turquoise
Q9UDW1	-0.55272	0.842964	0.283114	-0.350657	0.156285	-0.150094	0.12364	0.335647	-0.420826	-0.494184	-0.494747	turquoise
P53396	-0.0797373	-0.271482	-0.250657	-0.0857411	-0.0913696	0.749531	0.428893	0.350657	0.335272	0.218949	-0.00150094	magenta
P55072	-0.0493433	-0.696811	-0.794559	0.614447	0.241276	0.445966	-0.173171	0.433771	0.350094	0.794559	0.652158	blue
P42892	0.529644	0.0223265	0.0827392	0.175235	-0.00619137	-0.289118	-0.221764	-0.462664	-0.0193246	-0.0750469	0.268105	grey
Q658P3	-0.0103189	-0.0752345	-0.460225	0.7606	0.559662	-0.159662	-0.487054	0.0679174	-0.357036	0.165666	0.674109	brown
P11169	0.449719	-0.146529	0.0339587	0.00712946	0.0251407	0.0898687	0.249156	-0.157974	0.230206	0.0120075	0.206004	grey
P11766	-0.0598499	-0.447092	-0.586679	0.472983	0.273358	-0.043152	-0.529081	0.287054	0.372233	0.809568	0.442777	blue
O75828	0.626454	-0.393246	-0.0917448	0.136398	-0.0664165	0.112195	-0.0806754	-0.272045	0.355347	0.277861	0.321764	red
P05166	-0.206191	-0.325328	-0.547092	0.505441	0.510319	-0.0110694	-0.506567	0.30788	0.166417	0.677111	0.433021	blue
P49189	0.0774859	-0.56454	-0.613321	0.570169	0.165478	-0.0345216	-0.590244	0.111632	0.279925	0.79212	0.525704	blue
Q9UGJ0	0.0899145	0.316239	0.0201709	0.0605128	0.346325	-0.257436	-0.253333	-0.0782906	-0.180171	-0.118632	0.144615	grey
P54619	0.448593	0.234522	0.569606	-0.470356	-0.253471	-0.169794	0.305253	-0.554784	-0.12833	-0.557223	-0.345216	grey
P55786	-0.0547842	-0.666792	-0.636585	0.378987	0.0983114	0.33152	-0.215385	0.34728	0.560038	0.913884	0.404878	blue
Q9ULU8	0.0446529	0.243902	0.503565	-0.447655	-0.211445	-0.394747	-0.0930582	-0.0365854	0.296248	-0.253846	-0.453096	yellow
Q9H598	0.333396	0.413321	0.806191	-0.660225	-0.423827	-0.402627	0.253846	-0.526829	-0.117824	-0.6803	-0.545591	yellow
Q9Y2J8	-0.0675422	-0.0311445	-0.175797	0.305816	0.102251	0.190807	0.135272	-0.0285178	-0.406942	-0.0834897	0.162477	grey
Q96FW1	-0.207505	-0.17561	-0.116323	-0.180113	-0.0724203	0.209193	0.0615385	0.334146	0.369418	0.317073	-0.130206	grey
Q9H479	0.586492	-0.57955	-0.277111	0.201313	-0.0227017	0.426266	0.115197	-0.254034	0.246154	0.325704	0.459287	red
Q9Y5L3	-0.130957	-0.301313	-0.411632	0.569231	0.327767	-0.0181989	-0.371295	0.105629	-0.0962477	0.337148	0.419325	grey
Q14315	-0.019137	-0.296811	-0.469418	0.522514	0.279925	-0.036773	-0.47242	0.036773	-0.0964353	0.386867	0.499625	grey
Q13620	0.178049	-0.60394	-0.4606	0.325328	0.105253	0.506754	0.0155722	0.106942	0.542402	0.620263	0.437523	blue
P84103	0.0399625	-0.239962	-0.398311	0.336961	0.397373	0.182364	-0.0555347	-0.0193246	-0.0765478	0.33227	0.377111	grey
Q9BPX5	-0.384053	0.0270169	-0.0378987	-0.314822	-0.168856	0.415009	0.452345	0.653471	0.401501	0.192871	-0.395872	green
O14807	-0.00187617	-0.131707	-0.310131	0.588931	0.508443	-0.212383	-0.337148	-0.0350844	-0.361726	0.0739212	0.456285	grey
P17987	-0.0281426	0.227767	0.388743	-0.462664	-0.47167	-0.0643527	0.128518	0.0619137	0.303752	-0.291182	-0.491557	yellow
P23634	-0.00262664	-0.0795497	0.270732	0.0268293	-0.120263	-0.401689	-0.0814259	-0.108255	-0.000750469	-0.104315	-0.104878	grey
Q9UIJ7	0.0275797	-0.714822	-0.753659	0.563977	0.391557	0.386867	-0.242402	0.214634	0.269418	0.817636	0.687054	blue
Q9HAB8	0.30863	-0.24728	-0.19137	0.318762	0.0906191	0.0341463	-0.181051	-0.144465	0.186492	0.263977	0.380863	grey
P30566	0.29303	-0.315078	-0.191323	0.332148	0.0699384	-0.0355619	-0.24514	-0.225936	-0.0206259	0.22973	0.472025	grey
Q7Z2K6	-0.169043	0.488368	0.17167	-0.128705	-0.0183865	0.0787993	0.160976	0.203189	-0.211257	-0.402439	-0.236773	grey
Q9Y4J8	-0.392308	-0.330206	-0.838274	0.731707	0.580675	0.229831	-0.309568	0.557411	-0.135272	0.560788	0.609568	brown
P09211	0.299625	-0.494371	-0.432083	0.402439	0.041651	-0.0414634	-0.510694	-0.011257	0.466792	0.684991	0.511632	blue
Q12931	-0.413884	-0.0354597	-0.582176	0.281238	0.633959	0.297561	-0.0896811	0.635272	0.0189493	0.439212	0.303189	pink
Q04609	-0.019137	-0.0043152	0.0290807	-0.215947	-0.0930582	0.560788	0.6803	0.072045	-0.00375234	-0.123077	-0.151032	purple
Q9HB90	-0.556098	-0.171857	-0.458349	0.324765	0.176173	0.103565	-0.183114	0.662852	0.102251	0.504128	0.0968105	green
Q99435	-0.172804	0.0478228	-0.0609626	0.00809778	0.0796027	0.00504202	-0.00412529	0.219251	0.147441	0.0487395	-0.0961039	grey
P49207	0.504103	-0.0403764	0.269067	-0.0996827	-0.19291	-0.259875	-0.0268082	-0.477623	0.043659	-0.19466	0.146953	yellow
Q96JH7	-0.544653	0.531332	0.220263	-0.316698	0.130769	-0.0559099	0.241839	0.298311	-0.251782	-0.30469	-0.465478	turquoise
Q9H6V9	-0.153846	0.384615	0.367611	-0.123279	-0.159919	-0.62004	-0.241093	-0.0206478	-0.117004	-0.315385	-0.301417	grey
P16452	0.245216	0.00337711	0.353659	-0.0984991	-0.357411	-0.153096	0.00318949	-0.341463	-0.0787993	-0.327017	-0.0686679	grey
P61026	0.855159	-0.585178	-0.0249531	0.1197	-0.161726	0.22439	0.102627	-0.63152	0.218949	0.101501	0.427017	red
Q5TBA9	-0.00280112	0.273669	0.292717	-0.238655	0.0977591	-0.22437	0.107843	-0.192157	-0.169468	-0.310644	-0.248739	grey
P39023	0.219512	0.0527205	0.0793621	-0.0596623	0.065666	0.012758	0.0553471	-0.219512	-0.256848	-0.202251	0.169794	grey
Q92598	-0.0439024	-0.584991	-0.420075	0.190244	-0.0810507	0.362101	-0.0559099	0.412946	0.81182	0.742026	0.202064	blue
P51809	-0.427392	0.224015	-0.027955	0.19212	0.215197	-0.307692	-0.226454	0.261538	-0.240525	-0.0669794	-0.0326454	grey
Q9Y6D5	-0.105816	0.357786	0.684803	-0.676548	-0.454784	-0.175047	0.353659	-0.0260788	0.064728	-0.578236	-0.713321	yellow
P46060	-0.365478	0.191745	0.0727955	-0.190994	-0.00694184	0.189306	0.366792	0.194184	-0.196811	-0.232645	-0.214071	grey
Q8ND23	0.162625	0.322803	0.314794	-0.298331	0.157731	-0.0162403	0.180868	-0.284093	-0.211123	-0.369077	-0.143938	grey
P35270	-0.408097	-0.108907	-0.511741	0.391296	0.367611	0.217611	-0.100607	0.52834	-0.0767206	0.342713	0.313765	grey
Q14194	0.589306	-0.609944	-0.0157598	-0.0212008	-0.339024	0.166229	0.036773	-0.280113	0.769606	0.47561	0.142026	black
Q8NDH3	0.0533231	-0.521772	-0.541024	0.571887	0.179221	0.131551	-0.341176	0.126662	-0.0997708	0.418487	0.551719	blue
Q9BQI7	-0.147773	-0.0479757	-0.301215	0.446559	0.20668	-0.0568826	-0.176316	0.236235	-0.141093	0.0969636	0.369838	grey
O43813	0.641463	-0.390432	-0.00150094	-0.160225	-0.157598	0.619325	0.534709	-0.37242	0.21182	0.0739212	0.170544	magenta
P19634	-0.321862	0.0748988	-0.268826	-0.0269231	0.223482	0.42166	0.266397	0.551215	0.298583	0.267206	-0.0558704	grey
Q8NF91	-0.263158	0.286355	0.29686	-0.348506	-0.0537258	-0.070139	0.206915	0.0594157	0.00273553	-0.20976	-0.379582	grey
O43426	0.357974	-0.161726	0.333959	-0.387242	-0.410319	0.134334	0.233771	-0.245403	0.566792	-0.000562852	-0.227392	grey
P50453	-0.198778	0.00290298	-0.0872422	-0.115355	-0.150497	0.142552	0.195416	0.466463	0.308174	0.251642	-0.18136	grey
P10768	0.368105	-0.644278	-0.436961	0.392495	0.0622889	-0.0144465	-0.457411	-0.130582	0.366604	0.721388	0.513508	blue
Q9NYI0	0.183114	0.286492	0.718011	-0.453471	-0.354597	-0.615197	-0.0587242	-0.457974	-0.0183865	-0.413508	-0.4394	yellow
Q9NZH0	-0.0793621	-0.282739	-0.664728	0.722889	0.35197	0.190056	-0.260038	0.222326	-0.198874	0.361163	0.643715	brown
P61619	0.344737	0.437045	0.244534	-0.0919028	0.00607287	-0.174089	-0.0831984	-0.446761	-0.275709	-0.412146	0.0696356	turquoise
P11279	0.0153846	-0.227205	-0.491745	0.669794	0.502627	-0.237336	-0.636773	-0.0908068	-0.207129	0.385553	0.630769	brown
O75122	0.0317073	-0.176173	0.00337711	-0.365291	-0.237523	0.590994	0.6197	0.149156	0.504315	0.167167	-0.267167	magenta
Q96RL7	0.0782364	0.1	0.168293	-0.073546	-0.043152	-0.18424	-0.0472795	-0.0876173	0.0288931	-0.166417	-0.0851782	grey
Q9UEY8	-0.369606	-0.511445	-0.786492	0.577861	0.365478	0.359475	-0.193058	0.583114	0.218762	0.762477	0.479737	blue
O00442	-0.0979757	0.404656	0.0949393	-0.239676	0.197166	0.0935223	0.193927	0.082996	-0.296154	-0.378947	-0.182996	grey
Q07021	-0.533021	0.0225141	-0.45666	0.183114	0.361726	0.212946	-0.0397749	0.762664	0.056848	0.414071	0.0506567	green
Q01968	0.27636	0.418762	0.80863	-0.554034	-0.364916	-0.330206	0.248593	-0.456473	-0.206004	-0.7394	-0.536585	yellow
Q9BXP2	-0.413913	-0.0226087	-0.298261	0.338261	0.20087	-0.328696	-0.306957	0.543478	0.17913	0.261739	0.0765217	grey
Q12979	0.230957	0.226266	0.502627	-0.360976	-0.192871	-0.338274	0.0515947	-0.466417	-0.271295	-0.467355	-0.34878	grey
Q9NRW7	0.0360225	-0.239962	-0.373921	0.455535	0.383865	-0.139962	-0.466792	-0.0401501	0.0424015	0.45197	0.499625	grey
Q9Y5X2	0.175402	0.113689	-0.132509	0.230988	0.183718	0.165992	0.180873	-0.112813	-0.392931	-0.26272	0.202757	grey
O95394	0.404878	-0.422702	-0.274109	0.293996	0.0161351	-0.122326	-0.356285	-0.154409	0.378049	0.510319	0.361538	blue
Q5SWX8	-0.0545966	0.346154	0.0761726	-0.0885553	0.0981238	0.00956848	0.25197	-0.0575985	-0.223077	-0.304128	-0.135084	grey
P55011	-0.017636	0.0378987	-0.041651	-0.0409006	0.110882	0.480675	0.381614	0.058349	-0.0838649	-0.0874296	0.0506567	grey
Q9NRD5	-0.00863039	0.6606	0.853659	-0.790619	-0.417636	-0.327392	0.323265	-0.230206	-0.0517824	-0.682927	-0.83152	yellow
Q13367	0.649719	0.229081	0.749343	-0.399437	-0.332083	-0.387805	0.118574	-0.758724	-0.0737336	-0.625328	-0.255347	yellow
Q7Z6G8	0.0487805	0.0238274	0.286116	-0.355347	-0.16773	0.200938	0.412383	-0.154409	0.21651	-0.169794	-0.310319	grey
O14523	0.0803698	0.0884305	0.150071	-0.137743	-0.172594	-0.207444	-0.00426743	-0.192271	-0.196064	-0.121385	-0.109531	grey
O75027	-0.0103189	0.351032	-0.176923	0.370732	0.675422	-0.226266	-0.356848	-0.22439	-0.690807	-0.224578	0.380113	pink
P50895	0.0135084	0.0598499	-0.124765	0.38424	0.0395872	-0.213321	-0.289681	0.0879925	-0.143902	-0.0502814	0.263602	grey
O43761	0.469794	0.265666	0.86454	-0.534334	-0.459475	-0.575235	0.0103189	-0.696248	0.0559099	-0.560788	-0.438462	yellow
Q9BVL4	0.077193	0.37193	0.0894737	-0.00526316	0.378947	-0.278947	-0.270175	-0.414035	-0.529825	-0.129825	0.0649123	grey
Q9BUP3	0.213465	0.0574713	0.0569239	-0.255063	-0.113848	0.266557	0.215654	0.00218938	-0.0224412	-0.0651341	-0.0344828	grey
Q13641	-0.0828829	0.190734	0.164994	-0.199743	-0.123037	0.238867	0.396396	0.159846	0.234234	-0.0957529	-0.248906	grey
P40926	0.0155722	-0.545591	-0.337148	-0.00750469	-0.0870544	0.427392	0.102251	0.351782	0.814634	0.769418	0.0846154	black
P05388	-0.478799	0.519887	0.0574109	-0.104503	0.0666041	-0.105066	0.0116323	0.425891	-0.367167	-0.359475	-0.205253	turquoise
O15230	0.207692	-0.262289	-0.424953	0.517636	0.222889	0.283865	-0.026454	-0.026454	-0.0116323	0.183114	0.644841	grey
P06396	-0.227955	-0.531144	-0.857036	0.621951	0.357786	0.374109	-0.278424	0.513696	0.157598	0.822514	0.61182	blue
P08648	0.0619137	-0.268856	-0.581238	0.831707	0.445591	0.0350844	-0.386116	0.102814	-0.230394	0.258724	0.766604	brown
Q9NX00	0.280425	0.162023	0.477273	-0.601173	-0.231305	0.0139296	0.417155	-0.370601	0.254032	-0.297287	-0.45088	grey
Q8N145	0.187242	-0.0337711	-0.064728	-0.177861	-0.0414634	0.691182	0.664916	-0.0459662	0.0596623	-0.0410882	-0.0326454	purple
P08183	0.355347	-0.0140713	0.120263	0.0904315	-0.0816135	0.125704	0.102814	-0.348405	-0.0418386	-0.217636	0.166792	grey
Q9UQM7	0.161726	0.501689	0.809756	-0.809381	-0.452345	-0.314447	0.284991	-0.321951	0.04803	-0.590244	-0.729456	yellow
O43396	-0.0225141	-0.490807	-0.375047	0.239212	-0.147467	0.198311	-0.114822	0.290807	0.608068	0.651595	0.258724	blue
P53794	-0.036773	-0.201126	-0.30863	0.35272	0.0365854	0.232458	-0.113884	0.0560976	-0.195497	0.0677298	0.417073	grey
Q9Y6R7	0.239676	-0.330567	-0.416599	0.460324	0.180567	0.0338057	-0.329757	0.0125506	0.111741	0.42834	0.524291	grey
Q9H3Q1	0.112605	-0.0439776	-0.341457	0.468908	0.298039	-0.119048	-0.25098	-0.0196078	-0.131933	0.194118	0.487115	grey
Q16836	-0.164916	-0.666979	-0.655347	0.375235	0.158724	0.302439	-0.231707	0.361351	0.381238	0.856285	0.381051	blue
Q8WXD9	-0.222702	0.451595	0.368856	-0.447092	-0.082364	-0.111069	0.156285	0.198124	0.0694184	-0.278799	-0.540338	grey
P17301	-0.0521576	-0.196435	-0.503565	0.378236	0.339587	0.510507	0.204315	0.168668	-0.239962	0.20469	0.490619	grey
P21912	-0.426829	0.90469	0.23621	-0.193058	0.359662	-0.405816	-0.156848	0.186679	-0.487992	-0.44803	-0.297936	turquoise
O15321	0.393328	-0.0109971	-0.226173	0.500733	0.387463	-0.0601173	-0.330645	-0.430352	-0.355938	-0.0274927	0.586877	brown
Q27J81	0.0934334	-0.0204503	-0.25272	0.392871	0.204315	0.0305816	-0.11257	-0.0249531	-0.20863	-0.0322702	0.389869	grey
O76054	-0.321951	-0.289493	-0.771107	0.691932	0.504315	0.278987	-0.290432	0.453096	-0.217261	0.474296	0.601876	brown
Q9NZW5	0.039212	0.0744841	-0.258161	0.543527	0.380488	-0.281426	-0.393621	0.0410882	-0.265854	0.0467167	0.451782	brown
P08603	0.0262664	-0.3	-0.557974	0.734334	0.348218	0.260976	-0.165854	0.139775	-0.0996248	0.266979	0.689493	brown
Q08257	-0.142589	-0.510131	-0.588555	0.397749	0.177861	0.0538462	-0.370356	0.34803	0.494934	0.854034	0.352345	blue
Q15233	0.191596	0.174746	0.455083	-0.35923	-0.373892	-0.331437	-0.0495678	-0.301674	0.0915855	-0.208447	-0.349382	yellow
P25311	0.326957	-0.256522	0.0165217	-0.152174	-0.106087	0.401739	0.36	-0.0582609	0.214783	0.0791304	-0.0234783	grey
Q9NVH1	-0.442026	0.754409	0.182364	-0.112195	0.389118	-0.285929	-0.133021	0.24803	-0.437899	-0.365291	-0.243152	turquoise
O75165	0.0482176	0.472795	0.648218	-0.277111	-0.265854	-0.587805	-0.00750469	-0.285929	-0.196248	-0.622514	-0.41257	yellow
Q9NQ86	-0.131063	-0.0381837	-0.151703	0.164087	-0.0753354	0.382869	0.349845	0.153767	0.0732714	0.124871	0.240454	grey
O95970	0.32439	0.190244	0.544841	-0.532645	-0.401689	0.199437	0.746529	-0.297936	0.13546	-0.460038	-0.446154	purple
Q5T848	0.413968	0.32753	0.625911	-0.506073	-0.12247	-0.267409	0.295951	-0.541498	-0.0927126	-0.46336	-0.319433	yellow
Q9P258	0.0379327	-0.230915	-0.463964	0.496207	0.392366	0.130868	-0.180891	0.074917	0.0438596	0.335941	0.551446	grey
O43759	-0.0249531	0.530769	0.871295	-0.688368	-0.453846	-0.476548	0.193246	-0.20075	0.0236398	-0.706942	-0.759475	yellow
Q8TD19	-0.112946	-0.401689	-0.627392	0.603189	0.342214	0.142402	-0.391932	0.244653	-0.0943715	0.473734	0.534897	brown
Q8WXS5	0.00546559	0.174696	0.44919	-0.532186	-0.234818	-0.0210526	0.396964	-0.0939271	0.128138	-0.323684	-0.547773	grey
Q6IQ22	0.305816	-0.529456	-0.254784	0.415197	0.128893	-0.0598499	-0.325328	-0.106942	0.322139	0.445591	0.397561	grey
Q9UIW2	0.618949	-0.0825516	0.526266	-0.335835	-0.412758	-0.146529	0.254597	-0.554784	0.364353	-0.220263	-0.215572	red
Q8NBX0	0.115572	0.643715	0.322326	-0.235835	0.137523	-0.211632	-0.00919325	-0.304878	-0.659475	-0.591182	-0.139775	turquoise
Q9BQA9	-0.0489681	0.378236	0.29925	-0.0724203	-0.231144	-0.336961	-0.113133	-0.155535	-0.313133	-0.381426	-0.281801	grey
P55263	-0.220391	-0.0873016	-0.236874	0.0586081	-0.046398	0.23199	-0.00610501	0.261905	0.230159	0.355922	0.00854701	grey
Q6NVY1	-0.0923077	-0.447773	-0.751012	0.652632	0.512955	0.150202	-0.503036	0.281579	0.0801619	0.787045	0.659312	blue
P09669	0.198687	0.499437	0.24728	-0.0399625	0.254972	-0.400938	-0.160225	-0.449719	-0.495872	-0.446154	0.0375235	turquoise
P24752	-0.251407	-0.419137	-0.702064	0.446341	0.438274	0.204503	-0.346154	0.480113	0.381989	0.854972	0.418011	blue
P23526	-0.270919	-0.475235	-0.48424	0.166229	-0.0418386	0.278236	-0.15591	0.490244	0.630019	0.786116	0.135084	blue
Q13616	-0.0530957	-0.409944	-0.351595	0.140525	-0.110882	0.495497	0.215197	0.352345	0.564916	0.521013	0.119137	blue
Q99808	0.0666041	-0.0105066	0.0538462	0.209006	0.0148218	-0.0613508	0.00300188	-0.224578	-0.245966	-0.25985	0.187242	grey
P62906	-0.363977	0.347655	-0.0150094	-0.0686679	0.134709	0.0587242	0.0611632	0.421013	-0.179174	-0.201126	-0.117636	turquoise
Q9UJS0	-0.306004	0.482364	-0.197186	0.430957	0.635272	-0.24409	-0.312946	0.171482	-0.665291	-0.234709	0.306191	turquoise
P08294	0.143417	-0.14986	-0.190476	0.1493	0.156303	0.0392157	-0.118207	-0.0719888	0.231092	0.255462	0.169468	grey
O00519	-0.0493125	0.48293	0.419393	-0.386676	-0.258416	-0.365813	0.00403035	-0.251304	-0.244429	-0.487672	-0.400901	grey
Q86SK9	-0.22045	0.381989	0.445591	-0.200563	-0.264916	-0.457223	-0.0251407	-0.165103	-0.319512	-0.533771	-0.369231	grey
Q9UHN6	-0.298124	0.101313	-0.295122	0.383302	0.284053	0.0238274	-0.173734	0.358912	-0.101689	0.120638	0.223452	grey
P49748	-0.395122	-0.0992495	-0.696998	0.72758	0.747842	0.0339587	-0.322326	0.369981	-0.320075	0.369981	0.617824	pink
P23786	-0.278236	0.0272045	-0.403189	0.464916	0.653659	-0.133959	-0.280863	0.229456	-0.315385	0.162664	0.337711	pink
Q96AX1	-0.477298	0.470356	-0.152345	0.160225	0.296248	-0.0238274	0.0322702	0.459662	-0.466979	-0.218574	-0.0401501	turquoise
P05198	-0.0470919	-0.0435272	0.194747	-0.266604	-0.252345	0.385366	0.427955	0.0315197	0.291932	-0.115385	-0.325328	grey
Q14738	-0.331332	0.588743	0.49137	-0.565478	-0.193621	-0.275235	0.0797373	0.252533	-0.0440901	-0.426454	-0.675047	turquoise
O60784	0.0654784	-0.376173	-0.316698	0.032833	-0.0930582	0.447842	0.164353	0.108255	0.243715	0.396248	0.187054	grey
P13987	0.00919325	-0.329644	-0.456848	0.686304	0.144841	-0.110319	-0.489869	0.043152	-0.192308	0.271857	0.548405	brown
Q643R3	-0.343417	0.156303	-0.0347339	-0.0809524	-0.0196078	0.0896359	0.0179272	0.302801	0.127731	-0.0397759	-0.170308	grey
Q92900	-0.0444653	0.302439	0.344465	-0.374109	-0.161914	-0.0358349	0.263415	-0.188931	-0.219325	-0.379362	-0.271295	grey
Q969N2	-0.149343	0.557036	0.250094	-0.165291	0.0774859	-0.105629	0.00469043	-0.0523452	-0.462289	-0.522889	-0.186116	turquoise
Q7Z3U7	-0.160788	0.447842	0.598311	-0.584053	-0.297373	-0.272983	0.132645	-0.159099	-0.0849906	-0.437148	-0.613508	yellow
Q14558	-0.207129	-0.400938	-0.399437	0.315009	0.301126	0.287992	-0.00300188	0.315572	0.199062	0.452345	0.304315	grey
O75947	0.0868668	0.615197	0.243152	-0.093621	0.447655	-0.28818	-0.0660413	-0.239962	-0.464728	-0.412758	-0.0195122	turquoise
Q13425	-0.0234522	-0.402251	-0.380863	0.513696	0.196623	0.16379	-0.274859	0.125704	-0.0405253	0.301689	0.387242	grey
A1A5C7	-0.0216599	0.184008	0.582389	-0.504453	-0.475911	-0.193117	0.336235	-0.042915	0.0799595	-0.473887	-0.548988	yellow
Q15111	0.0934334	0.0530957	-0.145216	-0.0405253	0.161163	0.33227	0.249719	0.0604128	0.0637899	0.100188	0.0958724	grey
Q9NZ32	-0.0637899	-0.242214	-0.243527	0.120075	0.370919	0.148218	0.00787992	0.0883677	0.0292683	0.267542	0.195685	grey
Q9Y2Q3	-0.582927	0.137523	-0.542777	0.296435	0.713508	0.207129	-0.144465	0.650844	-0.220638	0.341088	0.213321	pink
P50416	-0.286304	0.463039	-0.104878	0.345403	0.381051	-0.292308	-0.245216	-0.0369606	-0.661914	-0.332458	0.193058	turquoise
P23381	-0.375985	-0.288368	-0.557786	0.197936	0.279925	0.247655	-0.120826	0.681989	0.454972	0.713321	0.185366	green
Q8TCG5	-0.246798	0.464039	0.404926	-0.240887	-0.125123	-0.442365	-0.044335	0.0817734	-0.2133	-0.32069	-0.383744	grey
O15530	0.036773	0.161163	0.416698	-0.330206	-0.088743	-0.227205	0.0320826	-0.209944	-0.152533	-0.449531	-0.305066	grey
P18124	-0.367917	0.35591	-0.0335835	0.104128	0.293058	-0.0318949	-0.0409006	0.348968	-0.356848	-0.233959	0.0172608	grey
Q9NY15	0	-0.00243902	-0.032833	0.190056	-0.054409	-0.315197	-0.430019	-0.00450281	-0.0217636	0.043152	0.0765478	grey
Q13043	-0.106073	-0.331174	-0.621255	0.801619	0.41417	0.0866397	-0.349798	0.212753	-0.210931	0.369838	0.740486	brown
Q9UL54	0.0553471	-0.120075	-0.101876	0.174109	0.105066	0.00581614	-0.067167	0.0245779	0.15197	0.258912	0.180488	grey
Q7L7X3	0.373358	0.1803	0.498124	-0.19137	-0.24878	-0.124765	0.237523	-0.489869	-0.200563	-0.593809	-0.205629	yellow
P35268	0.539024	-0.0900563	-0.0339587	0.271857	0.335084	-0.166417	-0.33621	-0.520638	-0.233208	-0.0909944	0.501876	grey
P55809	-0.102064	-0.425704	-0.552533	0.307692	0.452345	0.234334	-0.284053	0.306379	0.285741	0.71257	0.3803	blue
Q13671	0.0769231	0.395339	0.388773	-0.297735	-0.0093008	-0.388992	-0.0913667	-0.206915	-0.156801	-0.353977	-0.243681	grey
O60506	-0.0103189	-0.39531	-0.354034	0.126454	-0.0641651	0.54409	0.221951	0.213133	0.270732	0.381801	0.164916	magenta
O60271	0.161351	-0.40788	-0.152908	0.253846	0.00243902	0.0121951	-0.243902	-0.185929	0.17955	0.27955	0.329831	grey
Q8WXF7	0.0425891	0.522514	0.762289	-0.660413	-0.413321	-0.455722	0.10788	-0.257598	-0.0255159	-0.586492	-0.65666	yellow
P52209	0.0403377	-0.715947	-0.681051	0.484428	0.155535	0.261163	-0.329268	0.136398	0.419512	0.904315	0.531895	blue
P23141	-0.043115	-0.137701	-0.17881	0.167447	0.00835562	-0.106618	-0.337901	0.0955882	0.167447	0.244987	0.114305	grey
Q9UBG0	0.0709193	-0.020075	0.0150094	0.383677	0.0110694	-0.435084	-0.441276	-0.189869	-0.142589	-0.0757974	0.193246	brown
Q9ULP9	0.223452	-0.394184	-0.0097561	-0.0883677	-0.143902	0.064728	0.0228893	-0.0842401	0.322514	0.243152	0.00281426	grey
Q15417	-0.406191	-0.281238	-0.618199	0.434897	0.330582	0.226079	-0.266041	0.586679	0.309381	0.715385	0.294184	blue
O75746	-0.0354597	0.826079	0.558537	-0.607505	0.0153846	-0.181426	0.260788	-0.165478	-0.251595	-0.627017	-0.506191	turquoise
P09543	-0.00375234	-0.206942	-0.2197	-0.170356	-0.0521576	0.917073	0.741651	0.193809	0.191932	0.170169	-0.0510319	magenta
Q8N608	0.410319	0.0206379	0.746717	-0.636398	-0.521013	-0.145966	0.398311	-0.454221	0.293621	-0.369981	-0.573734	yellow
Q02750	-0.0844278	0.537711	0.840713	-0.810694	-0.632833	-0.25272	0.365854	-0.146904	-0.0150094	-0.698499	-0.882927	yellow
Q5T447	-0.515197	0.172233	-0.215197	0.115947	0.262852	0.17955	-0.0110694	0.516323	-0.0559099	0.112383	-0.036773	grey
O94811	0.673546	-0.348593	0.191932	-0.262289	-0.448968	0.00637899	0.043152	-0.431895	0.559475	0.145216	0.0136961	red
Q9Y696	0.0724203	-0.619325	-0.68818	0.437336	0.210694	0.541463	-0.102627	0.072045	0.0727955	0.640525	0.597561	blue
Q9UPR5	0.32833	-0.229268	0.491182	-0.39137	-0.54334	-0.172795	0.213696	-0.313508	0.50075	-0.0804878	-0.372795	yellow
P24588	0.0258416	-0.384305	-0.0896159	0.044808	-0.068753	0.0154101	-0.0320057	0.00663822	0.471076	0.392366	0.0310574	grey
P31431	-0.125403	-0.227419	0.00403226	0.0528226	-0.198387	-0.252823	-0.135484	0.0362903	0.117339	0.135081	-0.0612903	grey
P46379	-0.202251	0.557786	0.465854	-0.586116	-0.160413	-0.091182	0.242214	0.0523452	-0.221951	-0.541276	-0.59212	turquoise
A3KMH1	-0.194559	0.339962	-0.136398	0.0499062	0.598874	0.0363977	-0.0161351	0.0626642	-0.427767	-0.11651	0.0726079	turquoise
O43175	-0.117073	-0.449906	-0.585366	0.467355	0.296248	0.227955	-0.18818	0.155159	-0.121576	0.466792	0.448405	blue
O43572	0.461084	0.453695	0.48867	-0.207882	-0.0546798	-0.4	0.0463054	-0.59064	-0.291133	-0.50197	-0.102956	grey
O43707	-0.3	-0.46773	-0.731895	0.463602	0.217448	0.643902	0.103752	0.608818	0.241276	0.593809	0.412008	blue
P12814	0.106754	-0.544653	-0.509756	0.406754	0.106191	0.413884	0.0386492	0.218011	0.365666	0.438837	0.450094	blue
P06756	-0.135272	0.026454	-0.299812	0.455347	0.261914	0.0195122	-0.0268293	0.0412758	-0.393809	-0.0333959	0.360225	brown
Q92828	-0.177053	0.533724	0.421554	-0.33761	0.0439883	-0.252566	0.164589	-0.108871	-0.319648	-0.468109	-0.330645	turquoise
Q9UGT4	0.238837	-0.203002	-0.216698	0.542026	0.00356473	-0.206942	-0.419512	-0.157036	-0.0210131	0.133021	0.494184	brown
Q9UJ70	-0.000187617	-0.578236	-0.653659	0.618011	0.336773	0.0332083	-0.545403	0.0651032	0.0493433	0.67955	0.588555	blue
Q9NNW7	0.203565	-0.0611632	-0.0958724	0.113133	0.396435	-0.05197	-0.179362	-0.106379	-0.09606	0.125141	0.179174	grey
P12532	-0.158912	-0.0806754	0.0146341	-0.187805	-0.118762	0.449343	0.482176	0.424015	0.430394	0.0557223	-0.188931	grey
P12277	-0.570919	-0.0157598	-0.48743	0.173171	0.22045	0.395122	0.105629	0.718011	-0.0921201	0.269794	0.080863	green
Q92506	-0.151407	-0.34878	-0.597561	0.521576	0.453471	0.290244	-0.103752	0.231707	-0.132645	0.491932	0.463039	pink
Q9HC77	0.701149	-0.41434	-0.0799124	0.00985222	-0.21237	0.197592	-0.109469	-0.362343	0.375479	0.276409	0.238095	red
Q9Y5S1	-0.0943715	0.500375	0.590994	-0.588368	-0.247655	-0.137899	0.391557	-0.0397749	-0.0409006	-0.589306	-0.60788	yellow
O75340	-0.593058	0.0741088	-0.450657	0.326642	0.263415	0.0906191	-0.15985	0.714822	-0.194184	0.234146	0.162477	green
P62424	-0.327205	0.220075	-0.172983	0.0649156	0.227205	0.176923	-0.0333959	0.308818	-0.298874	-0.0737336	0.0801126	grey
Q6UXG2	-0.122383	0.527273	0.519022	-0.551413	-0.158747	-0.587777	-0.0154316	-0.0881589	-0.0823529	-0.349733	-0.552941	turquoise
Q96DG6	-0.239212	-0.529456	-0.716698	0.655159	0.395685	0.145966	-0.472608	0.318199	0.109006	0.725891	0.570544	brown
P36776	-0.544278	0.218199	-0.481989	0.284615	0.733959	0.075985	-0.234146	0.590619	-0.262852	0.243527	0.209568	pink
Q9BWM7	-0.0116323	0.750844	0.591932	-0.481989	0.079925	-0.5606	-0.095122	-0.256285	-0.421951	-0.60075	-0.452533	turquoise
P23677	0.303641	0.156022	0.302801	-0.281513	0.0358543	-0.00868347	0.133894	-0.207003	0.0302521	-0.285154	-0.094958	grey
Q05193	0.224203	0.437523	0.782364	-0.678049	-0.454972	-0.251595	0.332458	-0.31182	0.0228893	-0.636023	-0.637711	yellow
Q5T440	0.0902439	-0.137899	-0.0641651	-0.0459662	0.170356	0.294747	0.159287	0.0138837	-0.0309568	-0.00469043	0.113321	grey
Q96Q42	0.129883	-0.290732	-0.203414	0.337127	0.256155	0.0193675	-0.18328	-0.0751723	0.0355619	0.231426	0.305394	grey
Q16585	-0.607692	-0.200769	-0.35	0.372308	0.0807692	-0.13	-0.510769	0.586154	-0.161538	0.278462	0.0415385	green
Q96PV0	0.583302	0.0666041	0.672608	-0.470732	-0.414071	-0.00506567	0.433771	-0.608068	0.0348968	-0.519137	-0.338649	yellow
Q9BQA1	-0.377111	-0.322326	-0.376548	0.20863	-0.0311445	0.181051	-0.0782364	0.348968	0.121576	0.41576	0.0913696	grey
Q9BZZ2	0.494912	-0.192691	-0.0795492	0.352664	0.0550388	-0.357041	-0.476748	-0.519422	-0.0410329	0.0791115	0.409782	grey
O75083	0.22364	-0.475797	-0.68743	0.748218	0.537523	0.0984991	-0.420826	0.0140713	-0.100375	0.527392	0.887242	brown
Q9UL12	0.0210526	0.276316	-0.054251	0.263563	0.565992	-0.32996	-0.254453	-0.22996	-0.522874	-0.180972	0.289271	pink
Q8N9F0	0.515263	0.272283	0.52381	-0.34188	-0.263736	-0.169109	0.446886	-0.680098	-0.269231	-0.517094	-0.239927	yellow
P50990	0.665103	-0.242964	0.227955	-0.142964	-0.346529	0.143715	0.201126	-0.550469	0.252533	-0.189306	0.0908068	grey
Q9BXI3	-0.424348	0.436522	0.278261	-0.497391	-0.297391	-0.0382609	0.269565	0.272174	0.204348	-0.254783	-0.548696	grey
Q9BXS5	-0.253846	0.00412758	-0.0722326	-0.0410882	0.118949	0.373546	0.343527	0.337711	0.0514071	-0.0816135	-0.0712946	grey
Q9C0H9	-0.0484053	-0.0934334	-0.0110694	-0.335084	-0.116135	0.502064	0.611632	0.155347	0.390432	0.148968	-0.210694	purple
P06576	-0.164165	0.768856	0.487617	-0.584803	0.0424015	-0.193996	0.170356	-0.0131332	-0.283865	-0.561351	-0.537899	turquoise
P02462	0.32137	-0.252653	-0.259438	0.376518	0.0812999	0.0902725	-0.0574461	-0.250246	-0.0106139	0.10581	0.510887	grey
Q00610	0.088743	-0.130019	-0.128518	0.251032	0.0294559	0.117448	0.0380863	0.0716698	-0.00731707	-0.0694184	0.229456	grey
Q8ND76	0.476939	-0.434492	0.104947	0.0648396	-0.390374	0.0270722	0.0621658	-0.117981	0.632353	0.206885	0.0307487	black
P62266	0.280488	0.311445	0.429831	-0.150094	-0.217824	-0.409568	-0.078424	-0.378799	-0.185929	-0.457598	-0.0748593	yellow
Q9H993	0.526113	-0.38583	-0.05	0.202227	-0.0811741	-0.0720648	-0.196154	-0.389879	0.275506	0.256073	0.272874	blue
Q96AJ9	0.0498599	-0.0714286	0.229972	-0.0490196	-0.37535	-0.491597	-0.232213	-0.196359	0.152381	-0.0481793	-0.164426	grey
P11277	0.136398	-0.306754	-0.31576	0.508068	0.198499	0.142589	-0.178612	0.0258912	-0.0412758	0.190244	0.484428	grey
P50995	0.196998	-0.184615	-0.318386	0.650844	0.292683	-0.157974	-0.428893	-0.151032	-0.313133	0.144465	0.625141	brown
Q96CS3	0.160976	0.0673546	0.0148218	0.0667917	0.0324578	0.0703565	0.0641651	-0.0348968	-0.224578	-0.0921201	0.0748593	grey
P43155	0.0921201	-0.160788	-0.442777	0.410507	0.681801	0.169794	-0.134709	-0.0138837	-0.260976	0.31182	0.53152	pink
O00461	0.0711069	0.366979	0.356848	0.0401501	-0.11182	-0.445403	-0.190994	-0.415009	-0.449343	-0.502814	-0.0600375	grey
O00161	-0.429081	0.0585366	-0.377111	0.64728	0.357036	-0.297186	-0.452345	0.404315	-0.312383	0.127955	0.345028	brown
Q86VP1	-0.318623	-0.163563	-0.460931	0.326518	0.228947	0.261134	-0.113765	0.311134	-0.190283	0.255668	0.27004	grey
O00743	-0.0592871	0.145216	-0.00318949	0.0981238	0.178799	-0.175235	-0.0876173	-0.0178236	-0.359287	-0.178236	0.0833021	grey
P62714	-0.614634	0.150657	-0.266604	-0.10075	0.0457786	0.42833	0.362477	0.806004	0.18818	0.190432	-0.257598	green
P62140	-0.494934	0.00469043	-0.0727955	-0.279174	-0.161538	0.350281	0.25122	0.535084	0.196623	0.174109	-0.306754	grey
Q12860	0.245966	-0.103002	0.478799	-0.570169	-0.546341	0.348405	0.797749	-0.16848	0.394747	-0.230769	-0.475235	purple
Q8N4C8	0.142026	-0.0270169	0.17955	-0.00637899	0.0686679	-0.0440901	0.203002	-0.281614	-0.303189	-0.263977	-0.0609756	grey
Q02543	-0.462289	0.209944	-0.290056	0.0662289	0.268668	0.257223	0.00262664	0.488555	-0.314447	-0.000375235	0.021576	grey
Q96BY7	-0.245951	0.480567	0.189271	-0.379352	-0.000809717	0.278947	0.382389	0.269636	0.0651822	-0.255668	-0.362551	turquoise
Q96NN9	0.0580972	-0.0882591	-0.00222672	0.223077	-0.0246964	0.0103239	0.00607287	-0.047166	-0.042915	-0.117409	0.160729	grey
Q9HD20	0.11257	0.6394	0.403189	-0.138274	0.00750469	-0.398499	-0.0253283	-0.249343	-0.381051	-0.554221	-0.209006	turquoise
P02647	-0.0146341	-0.323452	-0.354597	0.388555	0.0684803	-0.0275797	-0.27561	0.114822	0.140338	0.440525	0.325328	grey
Q16851	0.00863039	-0.739775	-0.761914	0.562477	0.336773	0.414259	-0.221951	0.250657	0.375235	0.841651	0.624765	blue
P23515	0.214259	-0.590994	-0.5	0.218574	0.00694184	0.675235	0.174296	0.1394	0.3394	0.5	0.393246	magenta
Q86UP2	-0.326079	-0.213133	-0.437899	0.278799	0.12364	-0.0508443	-0.416886	0.359475	0.335647	0.571482	0.227955	blue
Q13033	-0.0450281	0.189118	0.0590994	0.0587242	0.131707	-0.132083	0.165666	0.0553471	-0.11576	-0.0849906	-0.0125704	grey
P02675	0.356473	-0.358161	-0.250844	0.361726	-0.00469043	0.181426	-0.15122	-0.148593	0.0575985	0.221764	0.498311	grey
Q9ULE6	-0.139512	-0.0368749	-0.503884	0.492286	0.43101	0.184156	-0.153737	0.145421	-0.318087	0.181749	0.516358	brown
P22102	0.148405	-0.16773	-0.0613508	0.142026	-0.170169	-0.191932	-0.17955	-0.14409	0.216323	0.212008	0.14334	grey
P32455	0.0381016	-0.684826	-0.681818	0.53242	0.120321	0.151404	-0.277072	0.176805	0.268717	0.783422	0.538102	blue
Q9Y6R1	0.39925	0.00243902	0.479362	-0.276923	-0.20863	-0.103752	0.337523	-0.411069	-0.00562852	-0.415947	-0.181238	grey
Q15276	-0.0268293	-0.209381	-0.339587	0.246529	0.166041	0.0684803	-0.24409	0.15591	0.0624765	0.331707	0.309568	grey
P28062	-0.0690432	-0.529644	-0.793996	0.778987	0.366229	0.166229	-0.431332	0.308068	0.182927	0.762289	0.730769	brown
P40925	0.113696	-0.611632	-0.278424	-0.0829268	-0.366041	0.390994	0.107692	0.190619	0.77561	0.672983	0.0575985	blue
P52895	-0.332622	-0.230204	-0.4789	0.445946	0.214083	0.154813	-0.272404	0.513276	0.0770507	0.504979	0.368895	green
P50502	-0.213884	-0.546341	-0.563227	0.244278	0.0294559	0.287054	-0.219512	0.401501	0.453471	0.782176	0.278799	blue
Q16799	0.0281426	-0.024015	0.291182	-0.537711	-0.40075	0.054409	0.314634	0.14728	0.592871	0.138649	-0.480863	black
O14672	0.0356473	-0.472045	-0.501689	0.280863	0.0420263	0.776548	0.306754	0.291557	0.191557	0.435647	0.306191	magenta
Q16822	0.163563	0.0947368	-0.186842	0.234008	0.311538	-0.233198	-0.293117	-0.129352	-0.103239	0.190081	0.363968	grey
Q9NZQ3	-0.0818011	0.606379	0.690432	-0.799812	-0.390619	-0.124015	0.476548	-0.0891182	0.0281426	-0.582927	-0.762289	turquoise
P46926	-0.0555347	-0.615947	-0.569418	0.384615	0.0594747	0.216886	-0.247842	0.386116	0.637336	0.882552	0.353283	blue
P16949	-0.0313321	-0.283677	-0.0527205	-0.279174	-0.432833	0.154784	0.0939962	0.279925	0.73621	0.406567	-0.202814	black
P51788	-0.212174	0.113913	0.0808696	-0.212174	-0.157391	0.141739	0.233043	0.312174	0.158261	-0.144348	-0.341739	grey
P30419	-0.50972	-0.197961	-0.485538	0.345187	0.266951	0.288288	-0.142959	0.596491	0.244429	0.441679	0.0986249	grey
O43765	-0.337711	-0.355535	-0.306191	0.121201	-0.0707317	0.187805	-0.206567	0.428143	0.469606	0.554034	0.0630394	blue
O75223	-0.102064	-0.562852	-0.392495	0.135084	-0.117261	0.231144	-0.126454	0.374484	0.692871	0.733583	0.159662	blue
Q12846	0.0748593	-0.390244	-0.553471	0.748405	0.290807	0.0968105	-0.32833	0.09606	-0.179925	0.325891	0.64728	brown
P61966	0.449413	-0.247067	-0.13893	0.388196	-0.0989736	0.111437	-0.146994	-0.26063	-0.0923754	0.140029	0.471408	grey
P32856	0.207505	-0.277298	-0.158724	0.498311	-0.00562852	-0.167917	-0.261726	-0.272608	-0.187617	0.0101313	0.371857	brown
P61266	0.189118	0.393621	0.827767	-0.863039	-0.600375	-0.153471	0.505066	-0.338274	0.143152	-0.578049	-0.772608	yellow
Q86X76	0.0530245	-0.154183	-0.0875161	-0.138481	-0.222651	0.202831	0.0198198	0.116345	0.132561	0.274903	-0.0756757	grey
Q96HS1	-0.0341463	0.616135	0.472045	-0.404315	-0.0589118	-0.249531	0.241088	-0.137711	-0.115947	-0.498499	-0.378049	turquoise
Q16795	-0.203752	0.912195	0.499625	-0.434522	0.194747	-0.460413	0.00187617	-0.134522	-0.49212	-0.65122	-0.449343	turquoise
P18077	0.463227	0.0703565	0.0454034	0.0138837	0.0448405	0.139775	0.142214	-0.253846	-0.274296	-0.223077	0.203002	grey
Q9ULV4	-0.0574109	-0.667355	-0.638086	0.407317	0.177298	0.316886	-0.243902	0.287242	0.490619	0.868668	0.469418	blue
P60520	0.225516	-0.533396	-0.397186	0.102627	0.121576	0.458161	-0.0281426	0.097561	0.544465	0.662101	0.296248	blue
Q96T76	-0.169493	0.261626	-0.0410329	-0.0318416	-0.00973848	0.0195864	-0.0154284	0.128789	-0.083926	-0.0990262	-0.1115	grey
Q9UQB8	0.607692	-0.16379	0.417824	-0.215947	-0.193996	-0.0106942	0.271857	-0.583302	0.130019	-0.2394	-0.0523452	red
P07339	0.358349	-0.467167	-0.34878	0.445028	0.151782	0.0373358	-0.393433	-0.0686679	0.36379	0.575985	0.506754	blue
Q96EY7	-0.0594595	0.52381	0.0432432	0.112741	0.610039	-0.420335	-0.316345	-0.0602317	-0.553668	-0.223938	0.0841699	turquoise
P28066	-0.0816135	-0.598874	-0.598874	0.445966	0.186304	0.431332	-0.0771107	0.363415	0.248218	0.614259	0.446717	blue
Q86YS7	0.358537	0.314822	0.664353	-0.504878	-0.37636	-0.124765	0.408818	-0.538837	-0.157598	-0.672045	-0.445591	yellow
Q9Y697	0.0242026	-0.0831144	-0.525328	0.481238	0.657036	-0.0129456	-0.346717	0.169418	-0.0341463	0.406004	0.591745	pink
P32189	-0.230019	0.677674	0.155535	0.0292683	0.447842	-0.380675	-0.153659	-0.0375235	-0.648593	-0.436961	-0.0606004	turquoise
Q9NQL2	0.0806723	-0.0663866	0.170308	-0.0406162	-0.0837535	-0.131653	-0.133333	-0.111204	0.0112045	0.0893557	-0.0229692	grey
Q9UKG1	0.510507	-0.396248	-0.163039	0.160976	0.0493433	0.336961	0.166979	-0.421951	0.0506567	0.123452	0.412946	grey
Q9H7D0	0.161726	0.0818011	0.322889	-0.499437	-0.465854	0.453283	0.762852	-0.114447	0.153283	-0.272045	-0.40863	purple
P28070	-0.0121951	-0.71651	-0.55666	0.45197	0.11576	0.250094	-0.266417	0.198499	0.432645	0.745779	0.450094	blue
Q96PY5	0.103377	-0.415947	-0.566979	0.390056	0.202439	0.586492	0.125516	0.0232645	-0.0515947	0.361163	0.522326	magenta
P23471	0.313508	-0.643527	-0.276548	0.0118199	-0.0838649	0.479174	0.174859	-0.0273921	0.483865	0.626266	0.187805	blue
Q12765	-0.323077	-0.605253	-0.570169	0.342402	0.0153846	0.202627	-0.252158	0.47561	0.485366	0.845216	0.278987	blue
P62081	0.125704	0.166417	0.0403377	0.114259	0.337711	-0.109193	-0.0202627	-0.186492	-0.37242	-0.241088	0.25666	grey
Q9BZC7	0.0195122	0.170919	0.0810507	-0.0810507	0.134146	-0.0956848	0.0288931	-0.109193	-0.23227	-0.127017	-0.0410882	grey
Q6YP21	-0.475797	0.350657	0.0939962	-0.152908	0.0174484	0.0791745	0.269043	0.444465	-0.236961	-0.238837	-0.404878	turquoise
P02794	-0.0681051	-0.470356	-0.593809	0.387054	0.245028	0.55985	0.0731707	0.295685	0.18743	0.587805	0.425141	brown
Q86WG5	-0.0868421	-0.0649798	-0.330769	0.597368	0.274696	-0.387652	-0.642308	0.126316	-0.108704	0.242915	0.476923	brown
Q9BV35	0.179998	0.510012	0.331874	-0.320276	0.0565707	-0.241274	-0.0762666	-0.358354	-0.266222	-0.363825	-0.200131	turquoise
Q92572	0.344841	0.157223	0.618762	-0.369794	-0.301689	-0.249906	0.0667917	-0.486304	0.012758	-0.416135	-0.33546	yellow
P61923	-0.480364	0.327733	0.0763158	-0.210121	0.0208502	0.0919028	0.200202	0.270445	-0.287045	-0.276721	-0.354251	grey
P09960	0.024015	-0.618949	-0.691182	0.579362	0.214071	0.205066	-0.420826	0.242589	0.34803	0.864728	0.580675	blue
Q12904	-0.0977486	-0.285553	-0.523827	0.582552	0.382176	-0.00150094	-0.342214	0.312383	0.000938086	0.503189	0.528893	grey
Q86X55	0.186842	-0.23502	-0.195344	0.367409	0.0255061	0.0744939	-0.229555	0.0119433	0.0165992	0.177935	0.369636	grey
Q9P265	0.290994	-0.374672	-0.456285	0.414822	0.376548	0.403565	0.0964353	-0.0844278	-0.122326	0.21576	0.548218	grey
A0AVT1	-0.259475	0.078424	-0.399437	0.456285	0.502814	-0.0921201	-0.309944	0.29212	-0.293246	0.150657	0.415572	grey
P40763	-0.0900563	0.036773	-0.420263	0.617073	0.539212	-0.189681	-0.429081	0.0163227	-0.488931	0.0378987	0.523827	grey
Q9Y5S2	0.519325	0.00712946	0.2	-0.203002	-0.0622889	0.205066	0.299437	-0.466979	0.079925	-0.124765	-0.024015	grey
Q13509	-0.118574	0.549719	0.699625	-0.745966	-0.422702	-0.0189493	0.554597	-0.011257	-0.032833	-0.675985	-0.755535	turquoise
P40616	-0.526454	0.464916	0.0998124	-0.142026	0.078424	-0.0555347	0.072045	0.373546	-0.326829	-0.278987	-0.288931	turquoise
P11215	-0.00600375	-0.00750469	-0.34334	0.680863	0.297749	-0.257411	-0.50788	0.0313321	-0.257223	0.10075	0.534897	brown
P00387	0.0103189	0.529831	0.43546	-0.00919325	-0.0395872	-0.611069	-0.188743	-0.319887	-0.573734	-0.657223	-0.182364	turquoise
P08133	0.384428	-0.449343	-0.261726	0.567355	0.026454	0.0836773	-0.125328	-0.161914	-0.0485929	0.130206	0.549719	brown
P47897	-0.0889306	0.0510319	-0.397749	0.333959	0.436961	0.136773	-0.176173	0.319137	-0.166417	0.115947	0.375235	grey
Q8NFV4	-0.262477	0.327205	-0.278049	0.263039	0.683302	0.112195	0.00525328	0.201126	-0.447092	-0.0311445	0.230394	pink
Q07960	0.0814259	-0.0412758	-0.0121951	0.346529	0.138086	-0.521201	-0.462664	-0.138086	-0.162852	-0.0662289	0.242777	grey
P60900	0.0440901	-0.699062	-0.657786	0.577298	0.221013	0.275985	-0.300188	0.291182	0.486116	0.858161	0.572795	blue
Q92945	0.132458	-0.616135	-0.45666	0.382739	0.0669794	0.126829	-0.37636	0.117261	0.4606	0.756098	0.401126	blue
O75146	-0.231895	-0.0849906	-0.470169	0.570356	0.461351	-0.093621	-0.274296	0.14878	-0.404878	0.12364	0.432458	grey
O00291	-0.205466	-0.0866397	-0.273279	0.05	0.151012	0.360324	0.181174	0.292308	-0.00587045	0.182186	0.0506073	grey
O43157	-0.50788	-0.0386492	-0.423827	0.374859	0.325141	0.10469	-0.065666	0.460413	-0.310319	0.163602	0.203565	grey
O60869	0.297186	-0.650657	-0.334146	0.376735	-0.103189	0.383865	-0.0183865	-0.0613508	0.377486	0.437523	0.467355	blue
P50570	-0.486679	-0.0307692	-0.628143	0.506567	0.328143	0.259099	-0.136961	0.681989	-0.148593	0.321576	0.364728	green
Q02878	-0.0878049	0.186304	-0.0791745	0.0335835	0.0360225	0.198499	0.087242	0.21257	-0.169794	-0.113508	0.0527205	grey
Q13574	0.372651	-0.0847976	0.042628	0.036822	-0.100993	-0.0560733	-0.111077	-0.299007	-0.128801	-0.0120703	0.203972	grey
Q9UID3	-0.160976	0.434897	0.623452	-0.671295	-0.458724	-0.330206	0.146154	-0.0756098	-0.12364	-0.535647	-0.712383	yellow
O15228	-0.268747	0.120416	0.138478	-0.1341	0.102901	-0.286809	-0.123153	0.110016	0.0941434	0.0060208	-0.153257	grey
O43242	0.385366	0.287054	0.577298	-0.254597	-0.21651	-0.324203	0.0909944	-0.609006	-0.333583	-0.601313	-0.250281	grey
Q99614	0.13995	-0.228581	-0.0563519	0.0920232	-0.0189299	-0.204946	-0.285699	-0.0841449	0.389868	0.27213	0.140169	grey
Q9BT78	-0.41257	-0.265103	-0.503752	0.224015	0.172608	0.25666	-0.145591	0.573171	0.428518	0.607129	0.134709	blue
P02679	0.0287054	-0.153096	-0.298874	0.390244	0.15666	0.0866792	-0.214447	0.133208	0.0384615	0.261726	0.415947	grey
Q5VIR6	0.182176	0.493809	0.745216	-0.56773	-0.349343	-0.470732	0.106567	-0.433021	-0.177111	-0.692308	-0.586679	yellow
O75964	-0.519325	0.865478	0.252908	-0.257974	0.399625	-0.385553	-0.101689	0.275047	-0.451595	-0.401876	-0.348593	turquoise
Q9Y375	-0.208237	0.199485	0.157529	0.0380952	0.184556	-0.203346	-0.205148	0.151866	-0.0936937	-0.0983269	-0.0743887	grey
P78527	0.097561	0.566604	0.776735	-0.737711	-0.468293	-0.24015	0.362101	-0.355159	-0.141276	-0.750094	-0.711069	yellow
O76024	-0.170544	0.578236	0.0855535	0.228893	0.271857	-0.565854	-0.328893	-0.0564728	-0.553096	-0.415197	0.0757974	turquoise
Q05084	-0.0749035	0.465122	0.503732	-0.416988	-0.25045	-0.4	0.0133848	-0.168597	-0.167568	-0.437066	-0.530502	grey
P42858	-0.0499062	0.525141	0.726079	-0.69606	-0.4	-0.360038	0.24803	-0.261163	-0.161163	-0.62045	-0.758724	turquoise
P41091	0.526079	-0.212946	0.234709	-0.183114	-0.0930582	0.303565	0.271295	-0.439962	0.106191	-0.159475	0.0482176	grey
P30153	-0.0919325	0.10075	0.47636	-0.644278	-0.438649	-0.00787992	0.260976	0.0803002	0.467355	-0.108068	-0.656285	grey
Q5KU26	0.132833	-0.224578	-0.189493	0.564353	0.115009	-0.384615	-0.561914	-0.284803	-0.257598	0.116698	0.414071	brown
P16112	-0.0797571	-0.37166	-0.662753	0.42834	0.276113	0.588259	0.204049	0.241093	-0.131377	0.374494	0.498988	magenta
O15031	0.127955	-0.0803002	-0.188931	0.531895	0.232645	-0.236398	-0.308255	-0.217824	-0.396623	-0.0165103	0.391182	brown
P83731	0.537148	0.122139	0.4803	-0.275797	-0.204503	-0.171107	0.024015	-0.488368	0.0393996	-0.335084	-0.110319	yellow
P14866	0.0153846	-0.486492	-0.609193	0.367917	0.233583	0.472608	0.0776735	0.159099	0.136773	0.546154	0.430206	blue
Q15365	-0.350844	0.122889	-0.290994	0.0958724	0.196248	0.218199	0.0272045	0.531144	0.0142589	0.113133	0.0913696	grey
Q16555	0.12045	-0.653659	-0.396623	0.0562852	-0.196998	0.581426	0.157598	0.266979	0.744841	0.714822	0.173171	blue
Q14195	-0.0786116	-0.658537	-0.670544	0.548405	0.238086	0.125704	-0.442214	0.302627	0.408443	0.902814	0.523077	blue
Q13642	0.217261	-0.40075	-0.278612	0.472045	0.204878	-0.146529	-0.410882	-0.205816	-0.00412758	0.298124	0.475797	grey
P08865	0.216886	0.434522	0.65197	-0.571857	-0.409756	-0.351782	0.0947467	-0.399062	-0.0879925	-0.560788	-0.468105	yellow
Q15102	-0.120075	-0.405629	-0.684428	0.688743	0.383114	0.0654784	-0.469043	0.316323	0.0592871	0.621201	0.659662	blue
O43324	0.174859	0.42439	0.358537	-0.146904	-0.0337711	-0.353096	-0.0688555	-0.302064	-0.4606	-0.512008	-0.102627	grey
Q6PHR2	0.380682	-0.22861	0.111631	-0.0300802	-0.0370989	-0.00233957	0.0240642	-0.354612	0.205548	0.0367647	0.0828877	grey
Q9NYU2	-0.522514	0.0120075	-0.359287	0.169231	0.186867	0.194559	-0.0433396	0.661538	-0.00187617	0.299812	0.00994372	green
O00232	-0.187242	0.436398	0.485553	-0.327017	-0.189493	-0.293433	0.262852	-0.0984991	-0.31576	-0.564353	-0.469043	grey
Q9NQ11	-0.34955	0.343115	0.156757	-0.217503	-0.163707	-0.0555985	0.209781	0.351866	0.203604	-0.124582	-0.422651	grey
Q93050	-0.000562852	0.478799	0.888368	-0.721388	-0.505253	-0.418762	0.278049	-0.218949	0.0311445	-0.698311	-0.789118	yellow
P28074	0.087242	-0.758537	-0.480488	0.424953	0.000750469	0.272795	-0.177111	0.214071	0.639587	0.778424	0.416698	blue
Q15018	-0.138086	-0.228893	-0.182552	0.142026	0.0378987	-0.0609756	-0.109381	0.211632	0.286492	0.282364	0.142589	grey
Q96G03	-0.333021	-0.285553	-0.68818	0.64334	0.379925	0.000375235	-0.404878	0.484991	-0.0776735	0.527205	0.485929	brown
P62993	-0.0746717	-0.472233	-0.525704	0.364165	0.191182	0.213133	-0.221388	0.376173	0.488368	0.756098	0.329644	blue
P16157	0.164165	0.137899	0.44409	-0.186492	-0.393621	-0.242964	-0.0065666	-0.241463	-0.012758	-0.35272	-0.204878	grey
Q92896	0.0621013	0.309381	0.322889	-0.0572233	-0.253283	-0.518574	-0.323265	-0.175235	-0.105629	-0.27167	-0.119137	grey
Q96DE0	-0.545142	0.205061	-0.0763158	-0.138866	0.114372	0.382996	0.332389	0.637045	0.107085	-0.0200405	-0.302024	green
Q99798	0.0772983	-0.679925	-0.558912	0.299062	0.206004	0.33227	-0.176735	0.162289	0.452158	0.837899	0.418762	blue
P26641	0.171107	-0.414634	-0.278049	0.0613508	-0.0699812	0.228705	-0.0193246	0.117448	0.524015	0.539962	0.196435	blue
P15311	0.0399625	-0.583677	-0.611445	0.689493	0.330957	0.196811	-0.312008	0.101501	0.0778612	0.631332	0.604315	brown
P22694	0.429644	-0.571295	-0.279174	0.190807	0.0277674	0.156848	-0.015197	-0.260225	0.385929	0.471107	0.380113	blue
Q9H1P3	-0.0444653	0.4394	0.557598	-0.41576	-0.324953	-0.30788	0.130769	-0.209193	-0.162852	-0.573546	-0.543152	grey
B7Z613	0.154409	-0.199437	0.115385	0.101126	-0.0500938	-0.289681	-0.113321	-0.119137	0.0615385	0.0309568	0.0876173	grey
P37840	0.262289	-0.215572	0.176735	-0.194747	-0.377861	-0.258161	-0.187992	-0.0928705	0.753471	0.296623	-0.173171	black
Q02790	0.246717	-0.548593	-0.401689	0.0803002	-0.157598	0.422326	-0.0681051	0.10394	0.633771	0.687992	0.297373	blue
Q00765	-0.492308	0.319325	0.0789869	-0.166604	-0.0174484	0.0682927	0.32045	0.459099	-0.0114447	-0.206379	-0.381426	green
P11021	-0.335835	-0.0560976	-0.149156	-0.132833	-0.126454	0.00712946	-0.1803	0.416698	0.379737	0.43621	-0.190432	blue
P78310	0.317261	-0.304503	0.204315	0.137899	-0.0324578	-0.274672	-0.0881801	-0.310507	0.15197	0.00600375	0.0688555	grey
O75431	-0.340713	0.867542	0.3803	-0.36848	0.253283	-0.387617	-0.0302064	-0.0136961	-0.530582	-0.581614	-0.403189	turquoise
P21589	0.0435272	-0.191745	-0.438462	0.801126	0.294747	-0.201501	-0.530582	0.0103189	-0.277486	0.166604	0.648405	brown
P04080	-0.185929	-0.477861	-0.669418	0.592871	0.174484	0.0198874	-0.622326	0.34334	0.146904	0.709944	0.528893	blue
P24666	0.721576	-0.507317	-0.166417	0.25666	0.0996248	0.0836773	-0.164353	-0.466792	0.190807	0.254034	0.568856	red
P07093	0.460038	-0.488931	-0.157786	0.321764	0.0529081	0.0566604	-0.12833	-0.338462	0.354409	0.365103	0.404128	grey
P34931	-0.168668	-0.502251	-0.666792	0.369231	0.208255	0.346717	-0.232833	0.413696	0.404503	0.827392	0.389869	blue
Q99442	-0.103565	0.418762	0.224578	0.0313321	-0.0242026	-0.410507	-0.0577861	-0.152533	-0.233771	-0.355722	-0.0943715	turquoise
O95202	-0.430769	0.865854	0.403565	-0.408443	0.114259	-0.432458	-0.0527205	0.190807	-0.406754	-0.529831	-0.500938	turquoise
O00410	-0.417448	-0.0953096	-0.436585	0.242589	0.133396	-0.0485929	-0.355535	0.534522	0.377111	0.483302	0.152158	blue
P54289	-0.00487805	-0.226266	0.185178	-0.106567	-0.415009	0.131895	0.369043	0.118386	0.393809	-0.0384615	-0.251032	grey
O60313	0.00375234	0.675797	0.698874	-0.560038	-0.226454	-0.281238	0.25666	-0.257223	-0.324015	-0.83621	-0.556848	yellow
P36957	-0.30075	-0.126266	-0.374109	0.106942	0.229268	0.0893058	-0.20075	0.375985	0.131707	0.459662	0.0998124	blue
Q8IY95	0.056848	-0.100375	-0.0677298	0.152908	0.118386	0.00881801	-0.167542	-0.177298	-0.221201	0.000562852	0.170544	grey
P78324	0.459475	-0.289681	0.431332	-0.412008	-0.399625	-0.0622889	0.231895	-0.402439	0.478612	-0.0272045	-0.228143	red
P00367	-0.254972	-0.446341	-0.711445	0.627017	0.491182	0.10788	-0.447467	0.408068	0.172233	0.764728	0.526642	blue
A1L0T0	-0.44803	0.646341	0.225891	-0.176548	-0.0634146	-0.152158	0.0748593	0.24728	-0.201313	-0.326079	-0.378049	turquoise
Q9NT62	0.0369606	-0.0757974	-0.186679	0.0908068	0.122326	0.344841	0.186304	-0.00750469	-0.324953	-0.0482176	0.17955	grey
P10636	-0.0138837	-0.346154	-0.172608	0.3	-0.0675422	0.0962477	-0.114634	0.036773	-0.080863	0.133583	0.231707	grey
P27105	0.143152	-0.129644	-0.0508443	0.402064	-0.0515947	-0.091182	-0.110131	-0.118949	-0.132458	-0.123265	0.314634	grey
P07108	-0.618386	-0.200375	-0.457786	0.161538	0.0294559	0.17955	-0.144653	0.729081	0.187617	0.567917	-0.0168856	green
P63000	0.334334	-0.272045	0.0853659	0.0866792	0.0116323	0.292871	0.393809	-0.245403	-0.0938086	-0.14728	0.105629	grey
Q9H9B4	-0.157223	0.743152	0.372983	-0.276173	0.303565	-0.547655	-0.222326	-0.196435	-0.558349	-0.493621	-0.273921	turquoise
P39019	0.393996	0.134897	0.290056	-0.165478	-0.0752345	-0.176173	-0.0457786	-0.448405	-0.163039	-0.292683	0.104878	yellow
O15511	-0.217409	-0.218016	-0.565587	0.409717	0.344332	0.0368421	-0.398583	0.352024	0.132389	0.513563	0.346559	blue
P16401	0.571171	-0.539768	-0.256113	0.218275	0.165508	0.352124	0.0707851	-0.337452	0.190476	0.387387	0.453282	blue
Q01650	0.184615	-0.257598	-0.190244	0.261351	0.196623	0.118386	-0.00825516	-0.130206	-0.0242026	0.130394	0.382364	grey
Q96GK7	-0.0337711	-0.420826	-0.626266	0.48743	0.386304	0.114259	-0.454409	0.270732	0.303565	0.770732	0.484803	blue
Q92616	-0.407692	0.519325	0.263415	-0.26773	-0.0825516	-0.224765	0.104315	0.0681051	-0.260413	-0.390432	-0.399437	grey
Q99569	0.421162	0.0198052	0.359449	-0.273225	-0.186344	-0.0712332	0.294234	-0.440201	0.0261517	-0.160959	-0.151767	grey
Q9BQE5	-0.379925	0.486116	0.0998124	-0.0804878	0.0851782	-0.0575985	0.0902439	0.194184	-0.230206	-0.325516	-0.170919	grey
P10114	0.458912	-0.251782	0.367917	-0.164916	-0.321764	-0.147467	0.18743	-0.408255	0.274109	-0.162664	-0.112758	red
P61225	0.603752	-0.372045	0.103752	0.203189	-0.127017	-0.211069	-0.193058	-0.497936	0.258724	0.0825516	0.245216	red
P48637	0.225462	-0.367473	-0.0557136	0.0225225	-0.0322428	0.113798	-0.06899	-0.125889	0.45377	0.325747	0.0708867	grey
P55160	-0.0763602	-0.199437	-0.494559	0.667167	0.470919	0.00675422	-0.404315	0.0440901	-0.211445	0.24878	0.590432	brown
Q9UJ14	0.269418	0.355347	0.814071	-0.627767	-0.496623	-0.374484	0.243902	-0.517261	0.121013	-0.527205	-0.633583	yellow
Q15382	0.317636	0.188931	0.247655	-0.106942	0.0562852	-0.146904	0.0829268	-0.292495	-0.141088	-0.328705	0.0249531	grey
Q9NUJ1	-0.487617	-0.314634	-0.618949	0.31576	0.252158	0.38349	-0.0388368	0.552158	0.20863	0.6394	0.215197	blue
Q9NSK0	-0.00829959	-0.367814	-0.434211	0.532794	0.12004	0.109312	-0.241498	0.143522	0.0987854	0.4083	0.502632	grey
A0FGR8	0.558912	0.291182	0.450657	-0.159287	-0.12045	-0.114634	0.253283	-0.595872	-0.27167	-0.560038	-0.0795497	grey
Q9H313	0.577298	-0.240525	0.16454	0.00900563	-0.0953096	-0.131895	-0.0043152	-0.489306	-0.079925	-0.122514	0.200563	grey
P51178	-0.0146341	-0.445216	-0.636585	0.762852	0.46379	0.260413	-0.161163	0.0472795	-0.293621	0.301126	0.714259	brown
Q6DD88	-0.475235	0.603377	0.0566604	0.00318949	0.0750469	-0.195122	-0.139212	0.339962	-0.390056	-0.320263	-0.193246	turquoise
Q9Y3Q8	-0.0399625	0.0484053	-0.0363977	0.0255159	0.0956848	-0.0136961	0.106942	-0.00938086	-0.340901	-0.171857	0.0369606	grey
P18206	0.155159	-0.575797	-0.600188	0.712383	0.137523	0.020075	-0.546341	-0.0414634	0.0508443	0.554409	0.714071	brown
Q9BZQ8	-0.0529081	-0.155722	-0.325891	0.589869	0.125516	-0.182176	-0.442964	0.0114447	-0.20788	0.102064	0.387617	brown
O43592	-0.183651	0.0557185	-0.288123	0.177053	0.351173	0.0131965	-0.0846774	0.298754	0.077346	0.273827	0.142595	grey
Q9NQW7	-0.186492	-0.446904	-0.542964	0.390432	0.219137	0.0275797	-0.435084	0.342402	0.412946	0.754034	0.305253	blue
P49589	0.0515947	-0.647842	-0.483677	0.260413	-0.0174484	0.339962	-0.105441	0.196435	0.559475	0.722326	0.324953	blue
Q9BQB6	-0.314367	0.0473794	-0.132509	-0.151767	-0.0876464	0.280665	0.10012	0.472809	0.0953058	0.065981	-0.188095	grey
Q9HCH3	-0.163415	0.449531	0.700938	-0.71576	-0.455159	-0.16773	0.446529	0.0998124	0.182364	-0.471295	-0.793058	yellow
Q66K74	-0.230019	-0.00206379	-0.240525	0.0825516	0.231707	0.253096	0.224015	0.282176	-0.0754221	0.128143	0.0555347	grey
Q9Y5J6	-0.62166	0.743927	0.212551	-0.365992	0.173077	-0.133806	0.0182186	0.378138	-0.338866	-0.368623	-0.474291	turquoise
O60831	-0.0440901	0.196248	0.0722326	0.0369606	0.024015	-0.106004	-0.130582	-0.097561	-0.494747	-0.27636	0.0181989	grey
P49368	-0.296998	0.420638	0.305816	-0.306754	-0.227767	0.00525328	0.330394	0.305253	0.0377111	-0.429644	-0.397936	turquoise
P35998	-0.124015	0.369231	0.395872	-0.159662	-0.189118	-0.193246	0.191745	-0.158349	-0.370732	-0.558349	-0.354784	grey
Q99250	0.34728	0.256473	0.722889	-0.713133	-0.415572	-0.124203	0.395497	-0.381989	0.265666	-0.388931	-0.591745	yellow
P38606	0.288555	0.33152	0.906567	-0.767917	-0.623265	-0.288368	0.356285	-0.401313	0.15591	-0.618386	-0.724015	yellow
P01034	-0.370919	-0.0437148	-0.0609756	0.0204503	-0.215947	-0.24409	-0.342964	0.393433	0.262101	0.24728	-0.142402	grey
Q96EQ0	-0.331332	0.272983	0.168105	-0.496998	-0.226642	-0.0707317	0.0587242	0.253283	0.221388	0.00469043	-0.490619	grey
P28482	0.44334	-0.760038	-0.274859	0.362664	-0.0163227	0.215572	-0.082364	-0.193246	0.309756	0.399625	0.409944	grey
P14927	-0.0737336	0.828705	0.414822	-0.363415	0.242402	-0.368293	-0.017636	-0.181801	-0.445591	-0.571295	-0.316323	turquoise
Q92696	0.233771	-0.390432	-0.397749	0.381989	0.18743	0.0506567	-0.349156	-0.0508443	-0.00731707	0.410694	0.474484	grey
Q9UQE7	0.0229885	0.443897	0.578544	-0.488232	-0.235906	-0.076081	0.334428	-0.175151	-0.184455	-0.599343	-0.462507	yellow
Q8NCG7	0.207129	0.314822	0.161914	0.174859	0.197186	-0.621201	-0.477298	-0.267167	-0.171857	-0.150469	0.122702	grey
P22061	0.0253283	-0.451595	-0.180488	0.125704	-0.107505	0.12364	-0.0547842	0.195497	0.716323	0.547467	0.079925	black
P26447	0.275418	-0.399743	-0.365251	0.412355	-0.010296	-0.113771	-0.312741	-0.141055	0.307593	0.435264	0.473359	blue
P09455	-0.0335835	-0.388931	-0.566041	0.336585	0.072045	0.398499	-0.148218	0.242589	0.203377	0.540901	0.413321	blue
P68400	-0.497186	0.244278	0.012758	-0.019137	0.0499062	-0.0921201	0.0405253	0.486679	-0.0739212	-0.0677298	-0.309006	grey
Q16352	0.348968	0.248405	0.503002	-0.617824	-0.451782	0.364165	0.61576	-0.351782	0.0159475	-0.459662	-0.408443	turquoise
Q00796	-0.136961	-0.54409	-0.740338	0.738649	0.463039	0.0737336	-0.50863	0.268668	0.116698	0.786116	0.621764	blue
Q9Y2L9	-0.287903	0.152419	-0.451613	0.447177	0.558468	-0.053629	-0.204839	0.318952	-0.471774	0.0733871	0.339516	grey
P17655	-0.143715	-0.452345	-0.781614	0.833771	0.436398	0.136398	-0.352345	0.249906	-0.190619	0.4803	0.709006	brown
P02533	0.312821	-0.284103	-0.0317949	0.0933333	0.345641	-0.0899145	-0.13641	-0.219145	0.195897	0.102222	0.318291	grey
P56192	-0.587992	0.72833	0.247655	-0.224765	0.0393996	-0.206191	0.0512195	0.37955	-0.327392	-0.459475	-0.391182	turquoise
Q9BW30	-0.433959	-0.275235	-0.608818	0.333771	0.224015	0.0752345	-0.369981	0.543902	0.0958724	0.646529	0.227205	blue
Q93045	0.00956522	-0.43913	-0.20087	-0.153913	-0.404348	0.00695652	-0.112174	0.162609	0.527826	0.384348	-0.0547826	blue
Q96AP7	-0.17242	-0.192495	-0.372608	0.332458	0.161726	0.245403	-0.0106942	0.254597	0.10075	0.333396	0.303002	grey
O94910	-0.0966229	0.23621	0.653096	-0.712946	-0.469606	-0.00750469	0.536773	-0.0243902	0.220826	-0.383865	-0.800938	yellow
P17812	-0.185553	0.285553	0.290994	-0.331895	-0.183114	0.0900563	0.336023	-0.0855535	-0.0553471	-0.321576	-0.353846	grey
P16144	-0.322702	0.110131	-0.106191	0.252158	0.143715	-0.0909944	-0.0675422	0.102251	-0.543527	-0.179925	0.101501	grey
Q14160	-0.131895	-0.132083	-0.507692	0.469794	0.445966	0.168856	-0.231144	0.137148	-0.20469	0.302439	0.462289	grey
P49754	0.154034	-0.00506567	-0.289681	0.481801	0.451782	-0.201876	-0.328893	-0.157974	-0.260976	0.0954972	0.500563	grey
Q7Z3C6	-0.0787103	0.213371	0.112613	0.0592698	0.0258416	-0.261024	-0.142248	0.154101	-0.167378	-0.23376	0.0267899	grey
P22570	-0.356285	-0.200188	-0.588368	0.476923	0.411445	0.45272	-0.0294559	0.497373	-0.152345	0.355347	0.345403	brown
Q8IYB4	-0.163563	0.347368	0.194332	-0.480567	-0.0854251	0.413968	0.532794	0.185628	0.062753	-0.251417	-0.432996	turquoise
Q07866	0.557036	-0.321013	-0.0266417	0.157974	0.116886	-0.157974	-0.241839	-0.545403	0.0699812	0.168105	0.325516	grey
Q9UNE7	-0.27561	0.28349	0.0756098	0.00225141	0.168668	-0.154221	-0.169981	0.112195	-0.297186	-0.121764	-0.184615	grey
Q99615	-0.295142	0.0623482	-0.0878543	0.084413	0.144737	-0.0502024	-0.162753	0.190283	-0.0366397	-0.0315789	-0.0925101	grey
P26038	-0.0262664	-0.496623	-0.702627	0.833771	0.49137	0.166979	-0.353846	0.136398	-0.0786116	0.537523	0.740901	brown
Q9Y617	-0.182739	-0.616886	-0.825328	0.59606	0.35197	0.309006	-0.356473	0.439212	0.21651	0.873358	0.593058	blue
O43272	-0.274296	0.15591	-0.308818	0.468293	0.545028	-0.118762	-0.318386	0.104128	-0.515197	-0.0105066	0.311069	pink
O43678	-0.228143	0.836023	0.31651	-0.330769	0.269794	-0.292495	0.0285178	-0.00881801	-0.571482	-0.558537	-0.326454	turquoise
O00468	-0.0521576	-0.268856	-0.536961	0.528143	0.496435	0.513133	0.142964	0.221576	-0.128705	0.262664	0.556098	grey
P15144	0.063227	-0.0896811	-0.208255	0.510319	0.282364	0.0699812	-0.138649	-0.0125704	-0.219137	0.00919325	0.456473	grey
Q9Y2Z0	-0.191932	-0.478049	-0.573546	0.409756	0.143527	0.276173	-0.250844	0.458724	0.326079	0.661351	0.389306	blue
Q9HBF4	0.0229086	0.350579	0.396654	-0.413642	-0.288546	-0.23269	0.151609	-0.0432432	0.0326898	-0.356757	-0.397169	grey
O60282	-0.0300188	-0.184803	0.118949	-0.260788	-0.298499	-0.0514071	0.036773	-0.0155722	0.536023	0.203752	-0.263977	black
Q8ND90	-0.19619	0.199866	0.139037	-0.0381016	0.106618	-0.337233	-0.0170455	0.0387701	-0.0504679	-0.112634	-0.112299	grey
Q9NR45	-0.266417	-0.430019	-0.579737	0.503002	0.287805	0.160038	-0.278987	0.426266	0.174672	0.652533	0.408255	blue
Q9Y230	-0.222139	0.583114	0.332083	-0.0577861	-0.0407129	-0.464728	-0.19606	-0.130769	-0.550844	-0.559475	-0.211445	turquoise
Q96AQ6	-0.507505	-0.075985	-0.569981	0.517073	0.418574	-0.173921	-0.492683	0.421013	-0.145591	0.460413	0.356098	brown
P46940	-0.154972	-0.342026	-0.809756	0.786304	0.530582	0.237148	-0.47167	0.346717	-0.0491557	0.596623	0.702627	brown
P43897	-0.178236	0.457223	0.140338	-0.238649	0.360038	-0.165854	0.0133208	-0.0461538	-0.400563	-0.238086	-0.197561	turquoise
Q8N122	-0.144465	0.266229	0.181801	-0.162852	0.148218	-0.218762	0.0251407	0.0174484	-0.210131	-0.109381	-0.237711	grey
Q9NZR1	0.17636	-0.626829	-0.342402	0.160788	-0.175235	0.246154	-0.105441	0.105066	0.677861	0.752908	0.243715	blue
P98160	0.518574	-0.238462	-0.14878	0.322702	-0.00844278	0.209568	0.073546	-0.389118	0.039212	0.0105066	0.501126	grey
Q14152	-0.418199	0.310319	-0.160976	0.181051	0.253283	0.0178236	-0.0380863	0.447467	-0.245216	-0.127955	0.000938086	grey
O00305	0.131144	0.323452	0.684615	-0.752908	-0.473546	-0.0446529	0.535647	-0.19212	0.215197	-0.475985	-0.698874	yellow
Q9NYB9	-0.0123827	-0.0810507	0.0547842	-0.181051	-0.107505	0.544278	0.606004	0.225141	0.211069	-0.120075	-0.113133	grey
P31939	-0.44409	-0.280863	-0.590244	0.479737	0.227955	0.0399625	-0.339962	0.527392	0.0598499	0.59531	0.336773	brown
O43854	0.182552	-0.174109	0.00994372	-0.219137	-0.230957	0.514822	0.462664	-0.0553471	0.157598	0	-0.035272	grey
Q99747	0.0926829	0.574296	0.789118	-0.793058	-0.404503	-0.192871	0.487805	-0.211257	0.067167	-0.614634	-0.735835	yellow
Q9NUT2	-0.158724	0.570169	0.0874296	0.126454	0.533396	-0.478987	-0.337148	-0.159662	-0.724765	-0.329644	0.0499062	turquoise
Q9Y426	-0.595497	0.405253	0.0626642	-0.189306	-0.000187617	-0.0622889	0.197373	0.381989	-0.242777	-0.195122	-0.373921	turquoise
O75390	0.169981	-0.380113	-0.162101	-0.181238	-0.181614	0.371295	0.136773	0.166229	0.77167	0.589493	-0.0163227	black
P42356	0.277298	0.455159	0.805441	-0.549719	-0.322889	-0.317073	0.31182	-0.438649	-0.0996248	-0.674672	-0.565478	yellow
Q8N335	0.293433	-0.586116	-0.316886	0.125141	-0.0183865	0.562664	0.206379	0.0585366	0.615385	0.573734	0.273921	blue
Q5TC12	-0.587901	0.352607	-0.197861	-0.0153743	0.288436	0.279412	0.202206	0.644719	-0.17246	-0.0287433	-0.0889037	green
Q8N4V2	0.0427126	0.324291	0.632186	-0.480162	-0.284008	-0.343725	0.246761	-0.235223	-0.0953441	-0.517814	-0.509312	yellow
O75064	0.272787	-0.100996	0.152861	-0.237553	-0.17956	0.424226	0.604552	-0.116534	0.169931	-0.268629	-0.153956	purple
Q9UM54	0.13152	-0.493996	-0.637336	0.6197	0.25197	0.268105	-0.242402	0.0977486	0.113508	0.599437	0.629831	blue
O43615	-0.254453	0.142308	-0.281781	0.17834	0.551012	0.00647773	-0.147571	0.376923	-0.125911	0.129555	0.128745	grey
P52306	0.0611632	-0.0146341	0.0547842	-0.260038	-0.115572	0.0448405	-0.0782364	0.0103189	0.296248	0.0906191	-0.150469	grey
O75096	-0.0446154	-0.16	0.0876923	-0.143077	-0.103077	0.0861538	0.110769	0.134615	0.402308	0.0530769	-0.164615	grey
Q15155	-0.129081	0.839775	0.445591	-0.300563	0.0277674	-0.384428	-0.00168856	-0.0898687	-0.389869	-0.607505	-0.354409	turquoise
P60660	-0.00487805	0.00731707	-0.209381	0.484991	0.197373	-0.0954972	-0.350281	-0.119325	-0.380488	-0.114822	0.404315	brown
Q04721	-0.366041	0.110882	-0.0333959	0.184615	0.14334	-0.140338	-0.187805	0.136023	-0.37561	-0.14334	-0.056848	grey
P29762	-0.160038	-0.336023	-0.52045	0.615009	0.15985	0.0228893	-0.404878	0.354784	0.120263	0.464353	0.464165	brown
Q13336	0.464575	-0.262348	-0.174089	0.361134	0.0722672	0.0374494	-0.101822	-0.457085	-0.224899	0.0589069	0.467206	grey
Q8IWT6	0.0559099	0.239962	0.457974	-0.286116	-0.325141	-0.203377	0.277298	-0.146717	-0.036773	-0.49606	-0.319325	grey
Q96GW7	-0.228143	-0.528705	-0.525891	0.21651	0.0551595	0.599062	0.15591	0.454972	0.259662	0.606567	0.220826	blue
P50991	0.420638	-0.135835	0.199812	-0.285178	-0.374859	0.293621	0.236398	-0.215572	0.285178	-0.121013	-0.130957	grey
Q9Y5X3	0.462101	-0.629081	-0.485553	0.44878	0.286116	0.442402	-0.0255159	-0.138649	0.157786	0.468668	0.636961	blue
O95372	0.00863039	-0.164728	-0.113133	0.126642	0.0395872	-0.0330206	-0.137523	-0.0065666	0.10075	0.153846	0.212758	grey
Q9UPR0	0.510887	-0.00120363	0.348944	-0.31371	-0.0521939	-0.0841449	0.124412	-0.426195	0.16446	-0.18897	-0.142138	grey
Q8IZP0	-0.149906	-0.0163227	-0.021576	-0.0356473	0.0472795	0.509944	0.587242	0.28818	0.0339587	-0.173734	-0.0562852	grey
Q99685	-0.22439	0.177861	0.294184	-0.386492	-0.2803	0.112195	0.354221	0.123077	0.264353	-0.19137	-0.458537	grey
Q13232	0.0234522	0.323077	0.0110694	0.197749	0.227392	-0.12364	-0.250094	-0.194559	-0.444278	-0.344653	0.172233	grey
Q9Y5P6	0.170169	-0.416135	-0.429268	0.408818	0.366041	0.315009	-0.10863	-0.106191	0.0409006	0.334522	0.533959	grey
P15559	-0.294939	-0.138462	-0.475304	0.579352	0.356275	-0.232389	-0.599595	0.317206	0.00647773	0.397166	0.424899	green
P06753	-0.00225141	-0.641463	-0.594747	0.403002	-0.0296435	0.328143	-0.144278	0.314447	0.550844	0.796435	0.420263	blue
P20851	0.0889594	-0.0318416	-0.0745158	0.44414	-0.00229784	-0.205384	-0.30255	-0.176715	-0.268191	-0.112157	0.348944	grey
P57088	-0.181426	0.491182	0.396435	-0.273546	-0.318199	-0.233396	0.189118	0.101126	-0.216698	-0.517448	-0.487242	turquoise
Q9NP81	-0.453096	0.235835	-0.162852	-0.132833	0.452908	0.141463	-0.0266417	0.429456	-0.0803002	0.174296	-0.104503	pink
Q14258	0.122326	-0.18743	-0.502064	0.587054	0.478236	-0.110131	-0.47636	-0.0733583	-0.322326	0.231144	0.633021	grey
Q14764	0.202627	-0.343527	-0.431895	0.402814	0.137336	0.468668	0.0767355	0.0429644	0.050469	0.287054	0.534897	grey
O75935	0.818826	-0.388664	0.00161943	-0.0168016	-0.0479757	0.252024	0.0819838	-0.557692	0.308907	0.20081	0.299595	red
Q16775	0.256473	-0.521388	-0.0675422	-0.117636	-0.480863	0.107317	0.0318949	0.0288931	0.794184	0.523827	0.0146341	black
O14818	0.665854	-0.577486	-0.259287	0.319887	-0.0290807	0.212758	-0.145591	-0.309006	0.458537	0.506004	0.501501	red
Q9HC38	0.0195122	-0.552533	-0.349906	0.149343	-0.142402	0.122889	-0.281989	0.269794	0.652158	0.752908	0.181426	blue
Q86W47	-0.214427	0.549407	0.545455	-0.508893	0.104743	-0.0701581	0.322134	-0.0958498	-0.0701581	-0.383399	-0.524704	turquoise
Q5T0D9	-0.319838	-0.116599	-0.216599	0.000809717	0.151215	0.00728745	-0.0925101	0.392105	0.211336	0.280972	-0.0848178	grey
Q96S19	-0.4606	-0.110882	-0.161914	-0.0654784	-0.0420263	0.206191	0.118011	0.381426	0.116698	0.169794	-0.185366	grey
Q8N2G8	-0.256158	0.701697	0.536398	-0.547893	-0.293377	-0.22058	0.211823	0.0552819	-0.274767	-0.616311	-0.662835	turquoise
P49795	0.0647131	-0.111722	-0.246642	0.438339	0.330891	-0.392552	-0.482906	-0.025641	-0.0262515	0.271673	0.410867	grey
Q9H2W6	-0.420448	0.284874	-0.170868	-0.00420168	0.589076	0.130812	0.0644258	0.386835	-0.282913	0.0204482	0.00588235	pink
Q15043	0.302987	-0.0294343	0.0184922	0.129445	0.0609476	-0.0077689	0.0692636	-0.269285	-0.209542	-0.19466	0.237335	grey
Q8IV08	0.219325	0.0772983	0.277111	-0.0600375	-0.134334	-0.436961	-0.330769	-0.256848	0.136585	-0.125704	-0.0990619	grey
Q9UHB9	-0.438649	0.387992	-0.123077	-0.145028	0.145779	0.255347	0.17167	0.495872	-0.00712946	-0.00900563	-0.146341	grey
Q7L2E3	-0.316135	0.669418	0.448593	-0.390056	0.084803	-0.205629	0.209568	0.04803	-0.466041	-0.635835	-0.434334	turquoise
Q10588	0.00102564	0.0461538	-0.244444	0.357949	0.411966	-0.33812	-0.346325	0.0119658	-0.162393	0.116581	0.342906	grey
Q9UM22	0.235647	-0.452908	-0.196248	0.117261	-0.327392	0.27242	0.111257	0.0649156	0.531332	0.430769	0.176735	blue
P80404	0.0260788	-0.636773	-0.59925	0.450844	0.318011	0.417073	-0.15591	0.274484	0.394934	0.778987	0.488743	blue
P12429	0.145966	0.0266417	-0.274296	0.418199	0.155722	0.00581614	-0.19137	0.0212008	-0.131144	0.00694184	0.433396	grey
P00390	-0.250281	-0.448968	-0.615197	0.472795	0.245591	0.00938086	-0.406754	0.353659	0.259287	0.745028	0.363415	blue
Q01518	-0.173734	-0.60863	-0.764916	0.55197	0.19137	0.199625	-0.425891	0.398124	0.355722	0.924203	0.542964	blue
Q01064	-0.226829	0.534334	0.559099	-0.641651	-0.387805	-0.0996248	0.380113	0.143902	0.0562852	-0.427955	-0.744465	turquoise
P40939	-0.00938086	0.0996248	-0.451595	0.517824	0.777674	-0.111445	-0.460413	-0.0664165	-0.553096	0.1197	0.576735	pink
Q86T65	-0.507505	-0.0964353	-0.401126	0.0851782	0.144465	0.563039	0.243902	0.519137	0.00450281	0.259287	-0.0249531	magenta
O95870	-0.303002	0.750094	0.517824	-0.545028	-0.0300188	-0.141088	0.233771	0.125891	-0.352533	-0.623827	-0.596248	turquoise
P05107	-0.106567	-0.113696	-0.576735	0.79137	0.525891	-0.0378987	-0.445591	0.127392	-0.442026	0.197186	0.67955	brown
Q7L576	-0.373546	-0.118574	-0.419137	0.394371	0.369418	0.464165	0.21257	0.392308	-0.181614	0.114822	0.302064	grey
Q96JC1	-0.203377	0.447467	-0.0287054	0.0153846	0.393621	0.121576	0.206942	0.214259	-0.483114	-0.348218	0.00262664	grey
Q9ULQ1	-0.0566604	0.266792	0.368668	-0.251595	-0.227955	-0.238462	0.109944	-0.157786	-0.256848	-0.407317	-0.387617	grey
P55010	0.350844	-0.367355	-0.431895	0.588368	0.273171	-0.0493433	-0.329081	-0.174672	0.0484053	0.393433	0.685929	grey
Q9H330	-0.294371	0.602064	0.27636	-0.0378987	0.100188	-0.331144	-0.030394	0.00506567	-0.443152	-0.496623	-0.277861	turquoise
Q63HM9	-0.642308	0.333846	-0.270769	0.108462	0.209231	-0.0507692	-0.0830769	0.743077	-0.101538	0.0869231	-0.0330769	green
O14924	-0.339076	0.21371	-0.155425	0.0953079	0.377933	-0.134897	-0.145161	0.0857771	-0.407625	-0.0366569	0.0520528	grey
Q8IXS8	0.19212	0.224953	0.501501	-0.489869	-0.245403	-0.0285178	0.356285	-0.262664	0.0831144	-0.290432	-0.427767	grey
O94760	-0.237523	-0.490807	-0.538274	0.331332	0.0427767	0.0810507	-0.333959	0.42439	0.523452	0.843715	0.275235	blue
P18669	-0.116886	-0.451407	-0.445779	0.140525	-0.056848	0.16379	-0.220638	0.454597	0.608443	0.760788	0.193058	blue
Q8IZU2	0.134818	0.314372	0.601417	-0.378138	-0.0742915	-0.380567	0.0234818	-0.35668	-0.135628	-0.424696	-0.376113	yellow
P27816	-0.00393996	-0.453659	-0.497186	0.380863	0.0938086	0.185366	-0.287242	0.255159	0.30788	0.582364	0.335272	blue
Q96SZ5	-0.276735	-0.254784	-0.181614	0.0272045	-0.122326	0.227017	0.136773	0.231332	0.325516	0.318199	-0.0821764	grey
O43488	-0.163039	-0.632645	-0.757598	0.585366	0.304315	0.252158	-0.378424	0.411069	0.274109	0.855535	0.543715	blue
Q9NQ48	-0.439775	-0.107129	-0.278236	0.0409006	0.125516	0.0630394	-0.0964353	0.589306	0.243715	0.400563	-0.0054409	grey
P01019	-0.673921	-0.148218	-0.605441	0.363227	0.294184	0.156848	-0.246154	0.84334	0.20075	0.627767	0.171857	green
Q9NV70	-0.058502	0.373077	0.438462	-0.170243	-0.213765	-0.265789	0.126923	-0.118421	-0.274899	-0.540486	-0.280769	grey
Q63ZY3	-0.0686071	-0.498195	-0.595142	0.622497	0.310428	0.105154	-0.344348	0.306051	0.0530693	0.437794	0.570631	brown
P40227	0.457786	-0.0463415	0.109193	-0.0382739	-0.0712946	-0.0330206	-0.0666041	-0.317448	0.137336	-0.122889	0.129456	grey
Q03001	-0.20469	-0.416135	-0.724765	0.431332	0.426454	0.630206	0.145966	0.454034	0.0461538	0.522514	0.469231	brown
O95980	0.147171	-0.0988073	-0.10581	0.35923	0.199256	-0.132071	-0.261626	-0.160083	-0.136667	-0.0160849	0.261626	grey
Q14C86	-0.388555	0.441651	0.145028	-0.138274	0.153471	-0.0780488	0.121764	0.230769	-0.234334	-0.237336	-0.258912	turquoise
Q9H061	-0.198687	0.829081	0.430394	-0.241839	0.274672	-0.507129	-0.157598	-0.0840525	-0.387617	-0.530582	-0.32833	turquoise
Q9ULX7	0.477486	-0.290807	0.0318949	-0.0553471	-0.157411	0.496998	0.458349	-0.180675	0.221576	0.0133208	0.137899	purple
Q9BW60	-0.1875	0.232258	0.0423387	-0.00766129	-0.0737903	0.13871	0.375403	0.0616935	-0.3375	-0.308871	-0.131048	grey
Q13618	-0.245966	-0.466229	-0.578236	0.335272	0.261726	0.486867	-0.0180113	0.471107	0.413884	0.613321	0.295122	blue
Q9NZC3	0.019137	0.347092	0.401501	-0.325328	-0.153659	0.0401501	0.350281	-0.344278	-0.282552	-0.512383	-0.357598	grey
Q3SXM5	-0.0919325	0.769418	0.473921	-0.420263	0.100375	-0.366792	0.00863039	-0.221388	-0.369981	-0.556098	-0.38743	turquoise
Q9Y2Q0	0.113133	0.432645	0.890432	-0.627017	-0.444841	-0.600188	0.0450281	-0.356473	0.0285178	-0.622514	-0.709193	yellow
P16152	-0.0242026	-0.467355	-0.694747	0.423077	0.215572	0.590056	-0.0168856	0.447655	0.208255	0.633771	0.479737	brown
P25786	0.0472795	-0.796998	-0.649531	0.55666	0.0913696	0.341276	-0.244841	0.260038	0.471107	0.842402	0.563415	blue
Q13938	0.0634146	-0.331707	-0.558349	0.712195	0.501689	-0.20394	-0.710694	-0.0444653	-0.212946	0.488555	0.681614	brown
Q9Y3D7	0.485628	-0.0932487	0.0825535	0.149064	0.0701872	-0.3125	-0.371324	-0.392045	-0.0173797	0.0501337	0.238971	grey
Q9P2B2	0.161351	-0.380488	-0.394559	0.586304	0.296248	-0.183114	-0.479925	-0.0876173	-0.146341	0.303002	0.519137	grey
O60716	-0.186492	0.352908	0.135084	0.0542214	0.0609756	-0.252533	0.0189493	0.0225141	-0.223265	-0.265478	-0.0774859	grey
Q8TB22	-0.0890605	0.131789	-0.152381	0.25251	0.542342	-0.27619	-0.415701	-0.0625483	-0.369627	0.0754183	0.279022	grey
Q9UPV7	0.208255	-0.0277674	0.38818	-0.323452	-0.30469	-0.293058	-0.0258912	-0.366979	0.209756	-0.146529	-0.268293	grey
Q8WUD6	0.0117302	0.415689	0.203812	-0.0102639	0.0370235	-0.373534	-0.077346	-0.166422	-0.446481	-0.322581	-0.021261	grey
Q8TDW0	-0.230988	0.383083	0.295984	-0.215888	-0.113251	-0.156582	0.152643	0.0167414	0.00164132	-0.306926	-0.369515	grey
P16070	-0.134897	-0.470732	-0.730019	0.790432	0.537899	0.253471	-0.262477	0.257974	-0.213321	0.445591	0.707692	brown
Q6PGP7	0.0287054	0.129644	0.16379	-0.0302064	-0.0446529	-0.17636	0.154972	-0.141088	-0.17167	-0.176548	-0.112008	grey
Q8NF50	-0.562477	0.441088	-0.254409	0.221013	0.34803	-0.0118199	-0.136398	0.46454	-0.37167	-0.0181989	0.0472795	turquoise
Q14123	-0.162477	0.220075	0.140901	-0.398499	-0.190619	0.408068	0.497186	0.160225	-0.0273921	-0.225516	-0.30469	grey
P26640	-0.444841	0.0305816	-0.479174	0.230019	0.225891	0.0988743	-0.100563	0.508818	-0.0630394	0.304503	0.251782	grey
Q13596	-0.381238	-0.0236398	-0.450844	0.299812	0.307505	0.460788	0.226266	0.467355	-0.213696	0.110507	0.18818	grey
P54764	-0.142964	0.386116	0.510882	-0.596435	-0.354597	-0.00450281	0.517448	0.0891182	0.0729831	-0.445216	-0.629644	turquoise
Q15119	0.532996	-0.131984	0.138664	-0.034413	0.124696	0.0145749	-0.0860324	-0.432591	0.0259109	-0.0346154	0.211538	grey
Q9HD42	0.739676	-0.12166	0.241498	0.0172065	-0.0953441	-0.271862	-0.132186	-0.727935	0.0271255	-0.13583	0.214372	red
Q9UNM6	0.534897	0.146154	0.559475	-0.30863	-0.390244	-0.265478	0.13152	-0.613508	0.0427767	-0.384803	-0.20863	grey
P28676	-0.129081	-0.0317073	-0.274859	0.0694184	0.0135084	0.168293	-0.0401501	0.209006	-0.036773	0.194934	0.0686679	grey
Q53HC9	-0.103565	0.29137	0.489681	-0.338837	-0.178799	-0.58424	-0.154784	-0.205253	-0.186867	-0.465103	-0.412008	yellow
Q96S97	-0.259219	0.227924	0.127257	-0.229237	0.0467228	0.210417	0.288544	0.245651	0.00645585	-0.187876	-0.273225	grey
P04843	-0.0598499	0.654221	0.132645	0.0786116	0.169231	-0.212758	-0.0855535	-0.0898687	-0.512758	-0.546341	0.0172608	turquoise
P23368	0.178987	-0.628143	-0.687617	0.49137	0.370169	0.377674	-0.200188	0.102627	0.355722	0.786867	0.609944	blue
Q13617	-0.0846154	-0.431144	-0.262664	0.153846	-0.196248	0.261726	0.15591	0.31182	0.531895	0.327955	0.106567	grey
Q92556	-0.204315	0.220638	0.0253283	-0.268293	-0.0574109	0.464916	0.460788	0.204128	-0.210131	-0.22364	-0.2394	magenta
P30626	0.0341463	-0.19137	-0.326266	0.339024	0.208818	-0.271482	-0.629831	-0.0123827	-0.110882	0.368293	0.396811	grey
P68371	-0.189493	0.571857	0.671482	-0.76773	-0.406191	0.00393996	0.558349	0.0836773	-0.00600375	-0.621013	-0.801313	turquoise
Q13885	-0.370544	0.517261	0.53152	-0.619887	-0.276923	0.0157598	0.47955	0.270732	0.00825516	-0.493246	-0.746529	turquoise
P07437	-0.118949	0.529081	0.707317	-0.653096	-0.36848	-0.144278	0.471295	-0.0454034	-0.0332083	-0.632645	-0.704128	turquoise
P19338	0.0814259	-0.0787993	0.156473	-0.160038	-0.193433	-0.1803	-0.125516	-0.173171	0.2394	0.126079	-0.161914	grey
Q96A23	0.0797373	0.385553	0.775422	-0.70863	-0.4606	-0.0924953	0.500563	-0.192871	0.183302	-0.489306	-0.729081	yellow
P62249	0.204128	0.410131	0.575235	-0.480113	-0.457411	-0.222889	0.139212	-0.298687	-0.1803	-0.65666	-0.386492	yellow
P50914	-0.352345	0.260976	-0.00844278	-0.12364	0.166792	0.114634	0.100563	0.30863	-0.246904	-0.166041	-0.0926829	grey
Q8N2F6	0.28349	0.346341	0.262289	-0.156098	0.202251	-0.382552	-0.145779	-0.40788	-0.283302	-0.268856	-0.0155722	turquoise
Q9UIA9	0.530957	-0.403752	-0.214259	0.478424	0.159099	-0.244465	-0.606754	-0.40788	0.0833021	0.27636	0.611069	grey
Q99755	0.0832148	-0.0678046	0.0507349	-0.0374585	-0.062826	0.170697	0.204125	-0.0237079	0.0282124	-0.0896159	-0.0535799	grey
O60331	-0.0142589	0.451782	0.782739	-0.667542	-0.492308	-0.340713	0.190807	-0.141088	0.0318949	-0.568668	-0.759099	yellow
Q9UL46	-0.436023	-0.267917	-0.730019	0.682739	0.454221	-0.0213884	-0.59137	0.53546	-0.0273921	0.588368	0.506754	green
Q7LDG7	0.420909	-0.0952381	0.25561	-0.0985222	-0.268199	-0.19595	0.16913	-0.448823	-0.0421456	-0.217843	-0.10509	grey
Q16773	-0.354597	-0.25122	-0.581989	0.206567	0.182176	0.600188	0.15197	0.62364	0.0864916	0.40469	0.195872	magenta
Q92522	-0.0271255	-0.339474	-0.499393	0.597368	0.442713	0.159514	-0.30749	0.17004	-0.0653846	0.404858	0.55587	grey
Q16531	0.21257	-0.446717	-0.23227	0.122514	-0.0803002	0.173171	-0.16454	0.0181989	0.587617	0.606004	0.18818	blue
O95182	-0.207692	0.851595	0.587992	-0.521201	-0.0514071	-0.495872	0.00806754	-0.171482	-0.420638	-0.662664	-0.545779	turquoise
O60641	0.387805	-0.460038	0.0332083	-0.0827392	-0.196435	0.506004	0.475422	-0.178987	0.418386	0.0574109	0.0530957	magenta
Q05469	0.46261	-0.352639	-0.170821	0.0652493	-0.255499	0.378666	0.258431	-0.112537	0.464076	0.201246	0.263196	grey
Q14344	-0.292495	0.171857	0.0581614	0.134897	-0.0377111	-0.133583	0.0606004	0.0217636	-0.387054	-0.325328	-0.102814	grey
P63092	-0.623827	0.335647	-0.0315197	-0.0454034	-0.0133208	0.0315197	0.235084	0.608255	-0.190994	-0.131707	-0.336961	green
Q7Z6G3	0.160225	-0.154409	0.358349	-0.145966	-0.263602	-0.552533	-0.3803	-0.220263	0.406942	0.0439024	-0.203752	black
Q99962	0.149719	-0.438086	-0.0405253	-0.193058	-0.366792	0.281989	0.0787993	0.107505	0.842589	0.46773	-0.0988743	black
Q9BY11	0.608255	-0.400375	0.110507	-0.0894934	-0.280113	0.397749	0.481051	-0.404503	0.329081	-0.0602251	0.159099	magenta
P07196	0.178799	0.386867	0.514634	-0.653471	-0.44334	0.317073	0.609381	-0.190994	-0.00694184	-0.49531	-0.50394	turquoise
O00186	0.24878	-0.291182	-0.498311	0.709381	0.400188	0.128893	-0.196248	-0.12439	-0.225141	0.244465	0.71182	brown
Q14644	0.0898094	0.122434	0.0989736	-0.00916422	-0.0344575	-0.256232	-0.241935	0.021261	0.061217	-0.10044	0.0256598	grey
Q13153	0.0626642	-0.294934	0.184991	-0.340525	-0.515947	0.0814259	0.174484	0.144653	0.858161	0.287805	-0.34409	black
P00450	-0.125141	-0.318762	-0.713321	0.929831	0.467355	0.00825516	-0.499812	0.227955	-0.209193	0.424765	0.786116	brown
Q9P1Y5	0.0301619	0.135628	0.415385	-0.313563	-0.0651822	-0.0981781	0.1417	-0.141093	0.226923	-0.192713	-0.259109	grey
Q969V3	-0.376548	0.84728	0.378424	-0.316886	0.0560976	-0.24803	0.00806754	0.184053	-0.351407	-0.568105	-0.43621	turquoise
Q03135	0.333583	-0.129081	-0.0399625	0.394934	-0.00994372	-0.25666	-0.381426	-0.359475	-0.0851782	-0.0427767	0.388368	brown
Q9UK41	-0.0196356	-0.208704	-0.124291	0.138462	-0.0554656	-0.0048583	-0.102024	0.0589069	0.24251	0.222065	0.0653846	grey
O43581	0.128705	0.020075	0.535647	-0.404503	-0.286679	-0.00375234	0.519512	-0.17561	0.253659	-0.253659	-0.446529	yellow
Q9BQG1	0.039212	0.192683	0.374296	-0.237148	-0.112383	-0.174109	0.295497	-0.118386	-0.135084	-0.39137	-0.340901	grey
Q9P121	0.720826	-0.436585	0.233959	-0.212758	-0.394559	0.192495	0.381426	-0.527955	0.296248	-0.00994372	0.019137	red
Q9UNS2	0.312946	-0.631895	-0.315572	0.202814	-0.130769	0.401876	0.0440901	-0.117824	0.502439	0.567542	0.337711	blue
P09471	0.790432	-0.390432	0.370169	-0.199062	-0.41257	0.0172608	0.305816	-0.584991	0.393809	-0.0399625	-0.0108818	red
Q9P2E9	-0.0188259	-0.232186	-0.118826	-0.142915	-0.0226721	0.122267	0.194534	0.0469636	0.343117	0.278947	-0.0941296	grey
Q8NB37	0.273171	-0.396435	-0.294371	0.0983114	-0.0144465	0.38818	0.126454	0.111069	0.406942	0.379737	0.243152	grey
Q9BXW6	0.696248	-0.258161	0.0958724	-0.00750469	-0.196435	0.226266	0.178236	-0.572983	0.212008	-0.0499062	0.217261	red
O75899	0.235835	0.22045	0.719325	-0.547467	-0.426079	-0.229831	0.403752	-0.445403	-0.0427767	-0.551595	-0.497936	yellow
P05165	-0.41651	-0.264916	-0.578987	0.409381	0.472983	0.0420263	-0.397936	0.546341	0.228518	0.685366	0.296435	blue
P04899	-0.0309568	-0.197561	-0.160225	0.369794	-0.0457786	-0.309944	-0.390056	-0.0273921	-0.215197	0.0560976	0.166229	grey
P42345	-0.150094	0.494371	0.514822	-0.191182	-0.126829	-0.532083	-0.069606	-0.135084	-0.382927	-0.511632	-0.394184	grey
Q9NZ45	-0.136773	0.742026	0.729456	-0.786867	-0.221576	-0.289493	0.247842	-0.177674	-0.136023	-0.633021	-0.783302	turquoise
Q8TDJ6	0.239024	0.482552	0.939587	-0.739587	-0.415197	-0.386304	0.263039	-0.437711	0.0105066	-0.74015	-0.706754	yellow
P54577	-0.165291	-0.286116	-0.239775	0.0977486	0.119512	0.0767355	-0.173734	0.311632	0.468856	0.547842	0.122889	blue
Q9UEU0	0.138274	0.103377	0.272045	-0.136961	-0.0461538	-0.307317	-0.174296	-0.435272	-0.134522	-0.11651	-0.0971857	grey
P20591	-0.181614	0.293809	-0.0611632	-0.130769	0.192683	0.216886	0.00450281	0.189681	-0.27242	-0.11182	-0.041651	grey
O14976	0.209381	0.281426	0.623452	-0.405629	-0.416698	-0.314071	0.113321	-0.327205	-0.0971857	-0.634146	-0.45591	yellow
P42785	-0.309384	0.0678152	-0.0428886	-0.0153959	-0.0938416	0.00146628	-0.0406892	0.3739	0.276026	0.061217	-0.19978	grey
P17858	-0.258724	0.496435	0.533959	-0.408818	-0.482176	-0.194559	0.250469	0.120638	-0.143715	-0.55197	-0.62439	turquoise
P38646	-0.289118	-0.419512	-0.65666	0.295497	0.319887	0.241276	-0.287242	0.487992	0.443152	0.866229	0.333021	blue
Q7Z4S6	0.0155722	0.473358	0.641839	-0.701876	-0.456473	-0.208818	0.191557	-0.0924953	-0.0227017	-0.515385	-0.663039	yellow
O94985	0.388555	-0.554034	-0.125704	0.15272	-0.217261	0.113321	-0.0990619	-0.121013	0.646341	0.487805	0.221764	blue
P82932	-0.732258	0.182661	-0.230645	0.366935	0.429839	-0.182258	-0.2625	0.569758	-0.323387	0.0875	0.066129	grey
Q9Y6I3	-0.136773	-0.202251	-0.0729831	0.122326	-0.0981238	-0.222514	-0.264353	0.276735	0.438837	0.368105	0.0380863	grey
P04271	-0.678739	0.101215	-0.371266	0.169056	0.063136	0.243024	0.0683882	0.855783	0.0878652	0.295765	-0.0668563	green
Q9Y608	-0.299398	-0.0290093	-0.212917	0.287904	0.143404	-0.168035	-0.304324	0.148878	-0.239737	0.0525452	0.162014	grey
Q9Y6M9	-0.140713	0.727017	0.270356	-0.203565	0.226829	-0.137336	0.153846	-0.00750469	-0.382364	-0.533396	-0.254784	turquoise
P40121	-0.372608	-0.447655	-0.876173	0.78349	0.448593	0.224203	-0.361351	0.552158	0.00938086	0.660788	0.642402	brown
P21695	0.0469043	-0.423265	-0.371857	0.0757974	0.00412758	0.375235	0.111445	0.269231	0.336023	0.436585	0.11576	grey
Q7Z6L0	0.354784	-0.139962	0.277861	-0.305629	-0.2803	0.144653	0.408255	-0.326266	0.318949	-0.0422139	-0.117824	purple
P78352	0.161538	-0.00581614	0.601313	-0.668293	-0.613696	0.0435272	0.466041	-0.272983	0.430769	-0.245779	-0.662852	yellow
Q9BZ71	-0.068915	0.289956	0.302053	-0.0923754	0.0729472	-0.183284	0.0813783	-0.0956745	-0.36217	-0.410191	-0.171921	grey
Q9HA72	0.253676	-0.186832	-0.320187	0.515709	0.162099	-0.221591	-0.520722	-0.197193	-0.105949	0.109291	0.535428	brown
P05186	0.0467167	0	-0.129456	0.257036	0.0377111	-0.0577861	-0.233208	0.067167	0.0977486	0.108255	0.26379	grey
Q9P253	-0.130769	0.175235	-0.106942	0.332645	0.178424	-0.198124	-0.148593	-0.0763602	-0.401501	-0.193433	0.20075	grey
O75363	0.0964353	-0.455159	-0.335272	0.130019	-0.144465	0.507129	0.247842	0.0703565	0.266979	0.337711	0.236585	grey
Q9P2J5	-0.295872	0.503565	0.18349	-0.135272	0.135084	-0.314259	-0.156285	0.117448	-0.288743	-0.296623	-0.151407	turquoise
Q99767	-0.0628518	0.331707	0.486867	-0.536398	-0.18424	0.0681051	0.516886	-0.102064	-0.108818	-0.500563	-0.521201	grey
P61254	-0.205253	0.23621	-0.136023	0.185366	0.348968	-0.164916	-0.245403	0.114259	-0.370919	-0.100563	0.185553	grey
Q8IWA5	0.100375	-0.420075	-0.199812	0.419137	-0.078424	-0.185553	-0.301501	-0.0881801	0.0378987	0.202064	0.30788	grey
P00491	-0.436773	-0.284053	-0.642026	0.427205	0.172608	0.158912	-0.278612	0.688555	0.253471	0.633771	0.296623	green
Q9NR22	0.0700855	0.281368	0.400342	-0.305299	-0.0454701	-0.288889	0.139829	-0.247179	-0.00376068	-0.288889	-0.250598	grey
P56817	0.479848	0.056899	0.483642	-0.294927	-0.221669	-0.389995	0.0218113	-0.524656	0.0279753	-0.322191	-0.217402	grey
Q8NAT1	0.370544	0.436773	0.407129	-0.263415	-0.102627	-0.334146	-0.0949343	-0.41182	-0.139024	-0.336023	-0.170169	grey
P61006	-0.0433396	-0.475422	-0.565478	0.609193	0.278049	0.117261	-0.204315	0.0763602	-0.0144465	0.391182	0.576923	brown
O43633	0.486304	-0.373358	-0.109006	0.346341	0.173358	0.0838649	-0.0424015	-0.495872	-0.130394	-0.0217636	0.48818	grey
Q99570	-0.218949	0.656285	0.678987	-0.618386	-0.365478	-0.211445	0.330394	0.045591	-0.127955	-0.688368	-0.705441	turquoise
Q68D91	-0.326829	0.327017	0.52758	-0.496998	-0.263039	-0.192308	0.288555	0.0643527	-0.0198874	-0.423452	-0.643715	turquoise
Q8TD22	-0.320263	0.54878	-0.0358349	0.219512	0.546341	-0.433396	-0.296811	0.00619137	-0.761538	-0.324953	0.0679174	turquoise
Q99873	0.238462	-0.122326	-0.0941839	0.286492	0.185929	-0.0733583	-0.195122	-0.244653	-0.124203	-0.0272045	0.338086	grey
P33176	0.0849906	-0.474484	-0.423265	0.342964	0.225704	0.103377	-0.340338	-0.0196998	0.169794	0.478612	0.395872	blue
P01903	-0.560038	0.196248	-0.263039	0.375047	0.365854	-0.23152	-0.303377	0.467917	-0.336773	0.000938086	0.130582	grey
Q8IUR7	-0.238462	0.703002	0.562477	-0.585929	-0.294371	-0.228705	0.3	0.117261	-0.150094	-0.562664	-0.67955	turquoise
O75396	0.166604	0.0260788	-0.325328	0.441088	0.43546	-0.116323	-0.353283	-0.149343	-0.350657	0.0615385	0.574109	grey
P00352	-0.319887	-0.575422	-0.780488	0.583865	0.24015	0.426829	-0.189306	0.574672	0.287992	0.813884	0.470732	blue
P13010	0.176548	0.454972	0.745779	-0.725141	-0.445779	-0.223827	0.322514	-0.375047	-0.0397749	-0.596435	-0.690056	yellow
B9A064	-0.00956848	-0.101689	-0.279362	0.423265	0.0251407	-0.10075	-0.319325	0.10394	0.126642	0.216135	0.41257	grey
Q96DM3	0.0598499	0.225891	0.224953	-0.0450281	0.0529081	0.204315	0.381614	-0.045591	-0.165478	-0.444465	-0.108255	grey
P29323	0.19606	-0.000375235	-0.0615385	0.0977486	0.0757974	-0.0928705	-0.101313	-0.0971857	-0.0472795	0.0553471	0.112758	grey
O75044	-0.102251	-0.221764	-0.487054	0.670919	0.489306	-0.0624765	-0.415009	0.00787992	-0.346529	0.188555	0.604503	brown
Q9Y6U3	-0.045749	-0.454656	-0.820445	0.788259	0.555668	0.172267	-0.383806	0.229352	-0.114575	0.577126	0.811336	brown
Q9P2P5	-0.180392	0.307283	0.385714	-0.419328	-0.164146	-0.12605	0.133613	0.0938375	0.111204	-0.152381	-0.506443	grey
Q9H270	0.238649	0.088743	-0.114447	0.403752	0.348593	-0.243527	-0.310507	-0.278799	-0.342777	-0.106942	0.36454	grey
O60502	0.561538	-0.345403	0.314822	-0.320826	-0.510507	-0.146904	-0.0487805	-0.505816	0.493246	0.0866792	-0.154597	red
Q3SY69	-0.474089	-0.176518	-0.660324	0.613765	0.354049	0.0194332	-0.418826	0.589474	-0.0226721	0.537652	0.45081	brown
Q05329	-0.266792	0.586679	0.556285	-0.501501	-0.246529	-0.278049	0.202627	0.0801126	-0.0377111	-0.470544	-0.696998	turquoise
O14994	-0.0326454	0.390994	0.718949	-0.743152	-0.426829	-0.269794	0.289681	-0.0859287	0.149156	-0.501501	-0.733959	yellow
G5EA09	-0.521073	0.259442	-0.254516	0.259989	0.0711549	-0.244663	-0.373837	0.588396	-0.0711549	0.256705	0.0925014	green
O00560	-0.106567	-0.273734	-0.593058	0.765478	0.400938	0.0992495	-0.357036	0.271107	-0.172795	0.312008	0.645028	brown
Q9Y4P3	-0.408502	0.348785	0.101619	-0.0831984	0.210526	-0.290486	-0.29413	0.237449	-0.328543	-0.0568826	-0.204858	grey
Q8NBM8	0.110882	0.313696	0.309568	-0.128143	0.0459662	-0.265291	-0.0491557	-0.130394	-0.126642	-0.295497	-0.127017	grey
O00233	-0.321576	-0.0894934	-0.375985	0.380675	0.32758	-0.185741	-0.537711	0.178236	-0.058349	0.449531	0.201689	grey
Q12929	-0.413043	0.0834783	-0.593913	0.603478	0.646957	0.00869565	-0.383478	0.345217	-0.606957	0.0547826	0.53913	brown
Q8NBN7	0.23583	0.0904858	-0.158907	0.194737	0.201822	0.0441296	-0.108907	-0.125506	-0.23502	0.0202429	0.308907	grey
Q9Y478	-0.140338	0.356473	0.185553	-0.174109	0.17636	-0.193058	0.0574109	0.079925	-0.222889	-0.278049	-0.213884	grey
Q9UKB1	0.0116169	0.110005	0.0011854	0.221195	0.263395	-0.197961	-0.171408	-0.182788	-0.296349	-0.16074	0.195116	grey
P40189	-0.0131965	0.152126	0.141862	0.0172287	-0.0626833	-0.36217	-0.0524194	-0.0623167	-0.0124633	-0.152126	-0.0597507	grey
O75695	-0.140713	-0.100938	-0.606379	0.778987	0.498499	-0.020075	-0.447842	0.29531	-0.18424	0.324765	0.639587	brown
Q92499	0.203565	0.0707317	0.318011	-0.523452	-0.274672	0.170732	0.257786	-0.108068	0.275797	-0.137336	-0.361163	grey
Q969Z3	-0.0206379	0.407317	-0.00281426	0.173546	0.562101	-0.25666	-0.190432	-0.227017	-0.689118	-0.283114	0.136023	turquoise
Q9UHL4	0.0362101	-0.413696	-0.367167	0.151032	0.0101313	0.0810507	-0.177674	0.170544	0.539775	0.67561	0.212383	blue
Q9Y5Z4	-0.196356	-0.297773	-0.4083	0.227126	0.154656	0.0180162	-0.46498	0.381377	0.38502	0.666194	0.232186	blue
Q8IWV7	-0.190323	0.0245968	-0.382258	0.222984	0.406855	0.15	-0.139113	0.118145	-0.277419	0.270968	0.174597	grey
Q9NVH6	0.046332	-0.0460746	-0.346203	0.319434	0.437066	0.0790219	-0.141313	0.0625483	-0.177091	0.292664	0.380438	grey
Q8N3E9	-0.0992495	-0.160788	-0.408818	0.360976	0.374672	0.36773	0.134897	0.157223	-0.460976	0.0596623	0.375985	grey
Q2M2I8	0.0727955	0.234522	0.35591	-0.306191	-0.239962	-0.125516	0.0945591	-0.120263	0.0529081	-0.361726	-0.283302	yellow
Q96RF0	-0.0562852	-0.158912	-0.579925	0.472983	0.408443	0.435647	0.04803	0.145216	-0.0469043	0.282552	0.541839	grey
P53779	-0.180113	0.530769	0.730019	-0.641276	-0.375985	-0.3803	0.187805	-0.0557223	-0.0945591	-0.591932	-0.802814	turquoise
Q9UN86	-0.459312	0.0473684	-0.359919	0.169028	0.136842	0.0601215	-0.00850202	0.563563	0	0.232186	0.048583	grey
Q9Y2G0	0.20863	0.32758	0.667542	-0.60075	-0.321576	-0.145966	0.393621	-0.327955	0.00300188	-0.526642	-0.567542	yellow
Q14156	0.252435	0.255498	0.083926	0.0532881	0.0473794	0.063136	0.206697	-0.209104	-0.356385	-0.408907	0.0414706	grey
Q8TCU6	-0.231144	0.14803	-0.111069	0.196811	0.284991	0.00750469	0.0694184	0.0210131	-0.438837	-0.137148	0.14409	grey
P50402	-0.0596623	0.251032	0.215385	-0.164728	-0.0380863	-0.138649	0.0500938	-0.102064	-0.15591	-0.23546	-0.160413	grey
Q9H0Q3	0.237079	0.0761024	0.257942	-0.15339	-0.123044	-0.216216	0.00545282	-0.188241	0.194405	-0.0611664	-0.0765766	grey
Q9ULT8	-0.127674	0.241979	0.0852273	-0.102941	0.165441	-0.0444519	0.0925802	0.0471257	-0.0748663	-0.171791	-0.0945856	grey
O75306	-0.321951	0.950657	0.435084	-0.455347	0.193058	-0.306191	0.1	0.0885553	-0.455535	-0.638462	-0.488931	turquoise
Q9H074	-0.236975	-0.277591	-0.257703	-0.0226891	0.110084	0.340616	-0.0305322	0.339216	0.310644	0.480672	0.00756303	blue
P25705	0.0195122	0.734709	0.428143	-0.482176	0.180113	-0.225516	0.122702	-0.174859	-0.376923	-0.536023	-0.366041	turquoise
P50225	-0.0493433	0.193621	-0.117824	0.26379	0.217636	-0.136023	-0.17242	-0.00956848	-0.334522	-0.128518	0.161351	grey
Q07020	0.0461538	0.14803	-0.0572233	0.150281	0.292683	0.012758	-0.0709193	-0.015197	-0.397749	-0.185178	0.239775	grey
Q9BWD1	0.410507	-0.621013	-0.180863	0.16379	-0.269794	0.172983	-0.0782364	-0.0315197	0.716698	0.537336	0.251032	blue
O43491	0.0459662	-0.374859	-0.40788	0.51576	0.374484	0.120638	-0.258724	-0.0491557	-0.105816	0.322514	0.478049	grey
O60503	0.324899	0.143725	0.423077	-0.293522	-0.342713	-0.228947	0.211134	-0.349595	0.0595142	-0.303846	-0.233198	grey
O75962	0.0888664	0.316599	0.280364	-0.210526	-0.00546559	0.0423077	0.399393	-0.1	-0.317814	-0.5083	-0.176113	grey
P16333	-0.439518	0.227696	-0.199234	0.314724	0.535304	-0.210181	-0.321292	0.245211	-0.516694	-0.0738916	0.209086	grey
P16284	0.133771	-0.336398	-0.565291	0.733959	0.463227	0.168293	-0.247655	-0.015197	-0.26848	0.25591	0.799062	brown
Q92841	-0.108818	0.483302	0.433583	-0.379174	-0.121764	-0.0739212	0.267542	-0.0401501	-0.341088	-0.553283	-0.442402	yellow
P50213	-0.237899	-0.329644	-0.490619	0.172045	0.284428	0.590994	0.194184	0.546529	0.314447	0.524765	0.171295	blue
P27338	-0.229268	0.0953096	-0.360976	0.626829	0.608255	-0.0596623	-0.256473	0.0831144	-0.673358	-0.0778612	0.497373	grey
Q06323	-0.601689	-0.191557	-0.595122	0.406942	0.237711	0.0450281	-0.377861	0.761538	0.207317	0.599812	0.191557	green
O94903	-0.394747	-0.114447	-0.503752	0.40788	0.486492	0.021576	-0.34334	0.456473	-0.0913696	0.369606	0.383865	brown
Q14689	-0.29912	0.389663	0.321114	-0.385997	-0.0494868	-0.134164	-0.0172287	0.106305	-0.0982405	-0.278959	-0.395894	grey
P09486	-0.355347	-0.198874	-0.723452	0.801501	0.451782	0.0463415	-0.467167	0.378612	-0.260413	0.396248	0.648405	brown
P41252	-0.22439	0.430206	0.202627	-0.216323	0.0315197	-0.091182	0.0729831	0.201313	-0.342214	-0.387242	-0.200375	grey
Q9UJW0	-0.180488	0.223265	0.309568	-0.524578	-0.32045	0.171482	0.32045	0.23621	0.095122	-0.215197	-0.488368	turquoise
Q8IXJ6	-0.249531	-0.0833021	-0.275985	-0.176735	-0.0405253	0.813508	0.593809	0.505441	0.27167	0.232458	-0.131707	magenta
P02741	0.295652	-0.33913	0	0.116522	-0.228696	0.0643478	-0.0104348	-0.186957	0.313913	0.295652	0.112174	grey
Q9H0W9	-0.215909	-0.460777	-0.568182	0.465176	0.265762	0.0531525	-0.401393	0.313783	0.254032	0.746334	0.38673	blue
Q99497	0.0718574	-0.588555	-0.393433	0.144841	-0.214071	0.254034	-0.158161	0.208443	0.693246	0.766792	0.224953	blue
P11217	-0.179174	-0.437148	-0.790994	0.728143	0.511445	0.449531	-0.158161	0.360976	-0.0684803	0.561914	0.715947	brown
Q92508	-0.019305	0.176062	0.023166	0.213385	0.224453	-0.220077	-0.0687259	-0.221622	-0.40592	-0.28314	0.106821	grey
Q8WWT9	0.354853	-0.178904	-0.115877	0.478718	0.0338111	-0.301674	-0.468432	-0.262283	0.0259328	0.103841	0.411533	brown
P00966	0.0198874	-0.562289	-0.639587	0.845779	0.351407	-0.0666041	-0.610882	0.0793621	0.0255159	0.609006	0.723265	brown
P52566	0.0266417	-0.652908	-0.801313	0.742026	0.442777	0.281051	-0.413133	0.283302	0.190619	0.778612	0.781238	brown
Q9GZT8	-0.0393996	-0.597749	-0.520075	0.349906	0.0105066	0.320638	-0.122702	0.310319	0.606379	0.779737	0.340901	blue
Q8TF44	0.0218623	0.347166	0.820445	-0.679757	-0.484818	-0.362753	0.20749	-0.295344	0.11498	-0.57166	-0.708097	yellow
P08247	0.694934	0.0487805	0.743152	-0.439587	-0.44878	-0.446904	0.0365854	-0.787054	0.116698	-0.447092	-0.284803	yellow
Q13409	0.254034	-0.506567	-0.380113	0.429831	0.0724203	0.154221	-0.254597	-0.0849906	0.257223	0.460976	0.516698	grey
P54829	-0.159109	0.459312	0.57996	-0.575304	-0.341498	-0.124291	0.372874	-0.0696356	-0.102834	-0.478138	-0.703644	turquoise
Q96G23	0.449678	0.1861	-0.0460746	0.214157	0.268468	-0.201544	-0.221107	-0.399743	-0.34955	-0.196911	0.320463	grey
Q9NZZ3	0.682661	-0.231452	0.0850806	0.0391129	-0.167339	-0.145161	-0.206855	-0.435887	0.125806	0.0991935	0.313306	red
Q9BRR6	-0.303036	0.324696	-0.0174089	0.112348	0.110324	-0.18664	-0.197166	0.127328	-0.388866	-0.275304	-0.0202429	grey
Q9Y6M4	-0.221201	0.125704	-0.112946	0.208255	0.0836773	-0.032833	0.0478424	0.260788	-0.0750469	-0.0412758	0.0619137	grey
Q53EL6	-0.692829	0.299831	-0.631846	0.4952	0.669113	0.218521	-0.0841333	0.692829	-0.239977	0.236589	0.241107	pink
P41250	0.415947	-0.547842	-0.305253	0.172045	-0.0589118	0.305253	0.0294559	-0.0712946	0.598874	0.539587	0.329081	blue
O94919	-0.422514	0.559475	0.0853659	-0.245216	-0.0536585	0.186492	0.421388	0.4	-0.302251	-0.39137	-0.371482	turquoise
P07384	-0.206942	-0.171857	-0.48349	0.495122	0.327017	0.121764	-0.0926829	0.181238	-0.157411	0.238274	0.405441	grey
P02511	-0.0636023	-0.161914	-0.329644	0.0378987	-0.00619137	0.50469	0.269981	0.169231	-0.011257	0.227205	0.143902	magenta
Q5T4S7	-0.394184	0.585178	0.266979	-0.207505	-0.0110694	-0.109006	0.115572	0.218199	-0.344841	-0.485929	-0.343527	turquoise
P05129	0.293996	0.302814	0.766979	-0.494184	-0.332833	-0.601126	-0.0846154	-0.474484	0.0990619	-0.45591	-0.485553	yellow
P39656	0.202814	0.579737	0.293996	0.0131332	0.0757974	-0.25666	-0.0863039	-0.324578	-0.561163	-0.637148	0.0172608	turquoise
P15927	0.293927	-0.211943	-0.0459514	-0.00789474	-0.0220648	0.259312	0.168421	-0.146761	0.137449	0.146154	0.13664	grey
Q5SRE7	-0.34334	-0.34878	-0.665666	0.667355	0.38743	0.190432	-0.275985	0.515197	-0.0484053	0.512008	0.501313	brown
Q99816	0.168016	-0.159919	-0.31417	0.60668	0.393522	-0.199798	-0.32996	-0.200202	-0.181579	0.196559	0.498583	grey
P30049	-0.187805	0.810694	0.498311	-0.466417	0.100563	-0.444653	-0.0324578	-0.142214	-0.350844	-0.588931	-0.461726	turquoise
O00764	0.263602	-0.370169	-0.199625	0.218574	0.0275797	-0.034334	-0.287617	-0.257974	0.0153846	0.281801	0.303565	grey
P12036	-0.0602251	0.340713	0.212008	-0.435084	-0.218011	0.49137	0.631895	0.0341463	-0.0859287	-0.369606	-0.329456	turquoise
P01889	-0.10075	-0.0208255	-0.248405	0.248593	0.136398	-0.254597	-0.44409	0.158161	0.144653	0.366604	0.280113	grey
Q99426	-0.153846	-0.619512	-0.824765	0.656848	0.423827	0.298124	-0.358537	0.330206	0.136961	0.768856	0.691745	brown
P51149	-0.572795	-0.143527	-0.622326	0.514071	0.329456	-0.0103189	-0.365103	0.734522	0.136773	0.553283	0.313508	green
P46782	0.275235	0.32758	0.562101	-0.304503	-0.441839	-0.430394	-0.00206379	-0.385178	-0.116698	-0.570544	-0.25985	yellow
P20020	0.526829	0.162289	0.760788	-0.612946	-0.504878	-0.246154	0.386304	-0.662289	0.0393996	-0.553659	-0.477298	yellow
O94979	0.238086	-0.103189	-0.262852	0.373171	0.312195	-0.0521576	-0.391182	-0.153283	-0.201313	0.151032	0.528518	grey
Q8WVJ2	-0.29137	-0.231144	-0.583677	0.400563	0.40075	0.1197	-0.382739	0.302251	-0.0452158	0.477111	0.446341	blue
P50336	-0.138086	0.273358	-0.181238	0.251032	0.649719	-0.210319	-0.357411	0.0309568	-0.463415	-0.0140713	0.245966	pink
P60484	0.0359606	0.0320197	0.285222	-0.376355	-0.251232	0.212315	0.27931	0.0660099	0.166995	-0.140394	-0.3133	grey
P78536	0.504979	-0.279352	-0.133384	0.513951	0.116752	-0.287231	-0.447204	-0.532115	-0.0872087	0.067294	0.506292	brown
O95278	0.136842	0.234586	-0.00601504	0.156391	0.284211	0.115789	-0.0165414	-0.129323	-0.512782	-0.178947	0.171429	grey
Q8TAC9	0.80668	-0.20749	0.501822	-0.160931	-0.35081	-0.335425	-0.059919	-0.812753	0.174696	-0.194332	-0.00748988	red
P35754	-0.720757	0.127038	-0.290076	0.0259328	0.131415	0.218733	0.0775796	0.821644	0.138855	0.301236	-0.171025	green
P45381	-0.194747	-0.12364	-0.264916	-0.101313	-0.11651	0.436773	0.162852	0.355535	0.317261	0.377861	-0.113696	black
Q93008	-0.0435272	0.646717	0.75666	-0.518386	-0.216886	-0.578987	0.0592871	-0.251407	-0.210319	-0.689118	-0.621013	yellow
O94874	-0.23621	-0.00206379	-0.603377	0.600188	0.692308	-0.0846154	-0.421951	0.332083	-0.343902	0.286304	0.599625	pink
O95757	0.287242	0.124203	0.313321	-0.522889	-0.330206	0.209756	0.360413	-0.19531	0.296998	-0.130206	-0.360413	grey
O14936	-0.472233	-0.0517824	-0.554034	0.500938	0.572045	0.241276	-0.0572233	0.536585	-0.282552	0.221201	0.31576	brown
Q99623	0.0313321	0.680863	0.194747	-0.0300188	0.499812	-0.430957	-0.298124	-0.214259	-0.574672	-0.431144	0.0227017	turquoise
O95834	-0.119251	-0.321479	-0.292793	0.365576	-0.0256046	0.0855856	-0.207444	0.227833	0.158369	0.257705	0.283073	grey
P41222	-0.645966	-0.0360225	-0.493433	0.206942	0.169418	0.286304	-0.0140713	0.849343	0.176923	0.470356	0.078424	green
O95140	-0.131332	0.758537	0.376923	-0.506004	0.175985	-0.154972	0.282176	-0.0545966	-0.409381	-0.587054	-0.40788	turquoise
Q3ZCQ8	0.193246	0.416698	0.109944	-0.012758	0.414634	-0.362101	-0.227017	-0.336585	-0.423077	-0.248968	0.12045	turquoise
Q99829	0.320075	0.276548	0.336398	-0.111257	-0.0825516	0.0121951	0.282176	-0.37167	-0.181801	-0.407317	-0.125891	grey
Q9UDT6	-0.261538	-0.285741	-0.400375	0.184053	-0.106004	0.318949	-0.0388368	0.42364	0.221201	0.488368	0.124203	grey
Q13867	-0.403441	-0.266599	-0.530364	0.396761	0.145142	0.0161943	-0.37996	0.552024	0.356883	0.62247	0.211943	blue
P11182	-0.0904315	0.246717	-0.301689	0.254221	0.764728	0.0497186	-0.236773	0.0750469	-0.445966	0.0433396	0.336961	pink
Q15907	-0.102814	-0.572795	-0.8197	0.811632	0.44728	0.318762	-0.254221	0.398874	0.17561	0.677861	0.780488	brown
Q9H6K4	0.468468	0.103841	0.152442	-0.0590327	0.056899	-0.0158843	0.000237079	-0.531769	-0.0934092	-0.183736	0.160266	grey
Q5JPH6	0.261538	0.0369231	-0.0107692	-0.153077	0.381538	0.0738462	0.00538461	-0.206154	-0.05	0.131538	0.143846	grey
Q6P1N0	-0.0325911	0.274696	0.065587	0.038664	0.152632	-0.27915	-0.290283	0.0352227	-0.130769	-0.0927126	0.0925101	grey
P12271	0.0163038	0.218514	0.161396	-0.0176168	-0.0176168	-0.169493	0.175183	0.0112704	-0.162928	-0.316555	-0.0377503	grey
Q96SB3	-0.347092	0.43621	0.178049	-0.134146	0.180488	-0.303377	-0.0840525	0.00168856	-0.284803	-0.198687	-0.290432	grey
P54578	-0.239587	-0.0748593	-0.278236	0.142026	0.0919325	0.213696	0.00206379	0.481801	0.244465	0.344841	0.075985	grey
Q969Q5	0.519325	-0.122139	0.141651	-0.0714822	0.147092	-0.115385	-0.0947467	-0.442964	0.10469	0.0317073	0.167542	grey
Q92734	0.590891	-0.54919	-0.371862	0.415385	0.091498	0.100405	-0.276316	-0.278947	0.326518	0.524291	0.614575	blue
P04792	-0.441463	-0.0641651	-0.673546	0.674484	0.45985	0.126829	-0.279925	0.48424	-0.338086	0.300188	0.535647	brown
O14974	-0.0859287	-0.19606	-0.463415	0.544465	0.442589	-0.0204503	-0.350657	0.157411	-0.199625	0.329081	0.550094	grey
Q13488	-0.024015	0.134522	-0.229644	0.49925	0.299062	-0.0606004	-0.177298	0.0726079	-0.239587	-0.0827392	0.372983	brown
Q9NUV9	-0.0725462	-0.176277	-0.598205	0.659919	0.40825	0.0272459	-0.317431	0.234271	-0.0760477	0.369734	0.581136	brown
P32004	0.335272	0.145403	0.775422	-0.690244	-0.58818	-0.172045	0.441088	-0.378236	0.296811	-0.413696	-0.658161	yellow
Q05397	0.238837	-0.118574	0.0679174	0.0979362	-0.0332083	-0.0560976	0.0157598	-0.300375	-0.170732	-0.165291	0.178049	grey
P00488	0.241463	-0.299437	-0.35272	0.627392	0.233771	-0.190432	-0.583865	-0.185929	-0.0924953	0.258537	0.536773	brown
Q96CV9	-0.468668	0.153283	-0.204503	0.0354597	0.000375235	-0.0703565	-0.170356	0.334897	-0.196248	0.0142589	-0.058349	grey
Q9UHQ4	-0.136023	0.383865	0.399437	-0.178799	-0.298499	-0.346341	0.0812383	-0.0998124	-0.162664	-0.428518	-0.28349	grey
Q14008	-0.145779	-0.279737	-0.348968	0.0572233	0.0641651	0.500188	0.13227	0.485929	0.416698	0.446154	0.117636	grey
P84095	-0.313696	-0.196998	-0.495685	0.154972	0.227767	0.702251	0.383677	0.39137	-0.16773	0.216323	0.138462	magenta
Q8IY17	0.0011257	0.477486	-0.0335835	0.12833	0.236773	0.0108818	-0.00562852	0.0251407	-0.422702	-0.316323	0.167542	turquoise
O14828	-0.1055	-0.193694	-0.218587	0.217639	0.0554765	0.180891	0.0817923	0.164533	0.0241821	0.0756283	0.239687	grey
O15126	-0.160038	-0.122514	0.0234522	0.0666041	-0.180675	-0.316698	-0.161538	0.126829	0.347842	0.21651	-0.140525	grey
P14314	-0.221201	-0.233583	-0.264916	-0.0981238	-0.0906191	0.239212	-0.0767355	0.321388	0.377674	0.54015	-0.0384615	blue
Q14515	-0.286679	-0.0502814	-0.0476548	-0.0834897	-0.179362	-0.173546	-0.112758	0.27955	0.438274	0.256848	-0.251032	grey
P04439	0.175985	0.0930582	0.019137	0.11257	-0.117636	-0.357223	-0.361726	-0.113884	0.120826	0.10075	0.135647	grey
P29474	0.240602	-0.135338	0.0962406	-0.178947	-0.515789	0.103759	0.0781955	-0.231579	0.372932	0.0466165	-0.21203	grey
P20702	-0.168105	-0.182739	-0.489306	0.665103	0.431332	0.027955	-0.307692	0.130394	-0.365103	0.20788	0.530957	brown
Q9P0V9	-0.291557	-0.198499	-0.592308	0.378049	0.382364	0.321764	-0.114259	0.390994	-0.273358	0.325328	0.37955	grey
P49773	0.194559	-0.667355	-0.305441	0.0782364	-0.303189	0.304878	-0.0123827	0.127767	0.693433	0.706567	0.183302	black
Q9P2R7	-0.242777	0.216886	-0.326454	0.0525328	0.638274	0.167167	-0.123265	0.25591	-0.250094	0.153846	0.165666	pink
Q99828	0.0881801	-0.271857	-0.355159	0.377861	0.204878	0.39925	-0.00187617	-0.130206	-0.272608	0.0891182	0.461163	grey
Q9UH62	0.52439	0.0714822	0.357223	-0.239212	-0.0883677	-0.0855535	0.147655	-0.501876	0.193809	-0.222702	-0.111445	grey
Q6UXB8	-0.113158	-0.455466	-0.636235	0.677733	0.310121	0.127328	-0.268016	0.195749	-0.0402834	0.555061	0.57166	brown
P13647	0.463054	-0.314778	0.00640394	0.0965517	0.175862	-0.130542	-0.145813	-0.334975	0.105419	-0.0571429	0.269951	grey
P35908	0.241699	-0.457143	-0.225225	0.209266	0.247876	0.0635779	-0.153153	-0.158559	0.132561	0.2574	0.325869	grey
Q6DN90	0.3	0.363602	0.82758	-0.779737	-0.482927	-0.0450281	0.536961	-0.471295	-0.0285178	-0.712008	-0.684991	yellow
O75976	-0.133583	0.451782	0.685178	-0.623827	-0.409944	-0.415197	0.0804878	-0.122326	-0.000938086	-0.482927	-0.761914	yellow
A0A087WWU8	0.0746717	-0.64409	-0.386304	0.225704	-0.15272	0.235272	-0.219887	0.0831144	0.5803	0.729831	0.284991	blue
P49961	-0.492308	0.0108818	-0.529456	0.601876	0.456473	-0.0677298	-0.462852	0.493809	-0.237148	0.251782	0.383865	brown
P11142	-0.346904	-0.475422	-0.501501	0.109006	-0.0577861	0.445403	0.0157598	0.623452	0.638274	0.757974	0.0851782	blue
Q96TA1	0.325141	-0.518199	-0.409006	0.660976	0.217824	0	-0.427767	-0.237899	-0.0435272	0.318011	0.631144	brown
Q00341	0.229644	0.239962	-0.0348968	0.0868668	0.232833	-0.246717	-0.200938	-0.145779	-0.172983	-0.101689	0.202627	grey
Q14206	0.113077	0.0784615	0.0869231	-0.141538	-0.0969231	0.180769	0.0576923	-0.149231	-0.000769231	-0.0638462	-0.0269231	grey
Q00688	-0.224089	-0.313158	-0.132186	0.196559	-0.133603	-0.149393	-0.271255	0.284211	0.44332	0.374696	0.0722672	grey
Q8N6N7	-0.112758	-0.274484	-0.14803	-0.0459662	-0.0983114	0.257598	0.0889306	0.2394	0.23621	0.380488	-0.00675422	grey
P30711	-0.612529	-0.0304049	-0.496715	0.407792	0.373568	-0.0203209	-0.367456	0.519633	-0.196639	0.279756	0.198472	green
Q96A33	-0.54334	0.806567	0.263977	-0.349719	-0.00619137	-0.117073	0.165478	0.333021	-0.350094	-0.483114	-0.512195	turquoise
P08670	0.212195	-0.554597	-0.47636	0.601689	0.0712946	0.157036	-0.229456	-0.0180113	0.148405	0.437523	0.525328	brown
Q9H0R8	0.0966189	-0.259875	-0.0806434	-0.0158661	-0.0482547	-0.144983	-0.330561	0.00295437	0.484189	0.469307	0.043659	blue
P21741	0.144841	-0.236585	-0.113133	0.193621	0.17636	0.126079	0.0876173	-0.118011	-0.106567	0.030394	0.254784	grey
P55327	0.175422	0.0146341	0.259287	-0.535835	-0.518386	0.23546	0.309756	-0.0287054	0.380863	-0.0011257	-0.379925	grey
Q9UBI6	-0.229456	-0.231144	-0.380113	0.585178	0.1803	-0.246154	-0.485741	0.175797	-0.153659	0.310131	0.377861	grey
P00505	0.263039	-0.541839	-0.143715	-0.13152	-0.266229	0.347842	0.128518	0.0615385	0.78424	0.620075	0.0213884	black
P12081	-0.264916	-0.43546	-0.645966	0.385741	0.323077	0.236398	-0.284803	0.389869	0.299437	0.734709	0.338462	blue
Q16658	-0.0585366	-0.659475	-0.519137	0.196435	-0.0756098	0.555722	0.0923077	0.339212	0.634522	0.775985	0.247655	blue
P10515	-0.590432	0.637336	0.113508	-0.260225	0.225891	-0.0636023	0.0769231	0.571857	-0.223077	-0.194371	-0.406942	turquoise
Q9Y2J2	0.178987	0.4	0.763977	-0.806004	-0.488555	0.021576	0.582364	-0.33227	0.0393996	-0.634334	-0.728143	yellow
Q96CN7	-0.339271	-0.180567	-0.345344	0.0611336	0.142713	0.145951	-0.146154	0.632794	0.348178	0.519636	0.0228745	green
Q9H4G4	-0.134522	-0.0257036	-0.24728	0.262289	0.151595	0.24803	0.13546	0.0144465	-0.361351	-0.0795497	0.145591	grey
O60741	-0.0592871	0.610319	0.433583	-0.580113	-0.154597	-0.0166979	0.431144	-0.00187617	-0.0118199	-0.469794	-0.54409	turquoise
Q5VWZ2	-0.108255	-0.256848	-0.677111	0.669981	0.82833	0.0440901	-0.481426	0.226266	-0.266417	0.459099	0.682364	pink
P21283	0.25122	0.388555	0.946341	-0.712195	-0.55666	-0.408255	0.263415	-0.418574	0.107692	-0.663602	-0.717824	yellow
O95861	0.100563	-0.665854	-0.530394	0.371107	0.101501	0.336023	-0.154784	0.193246	0.485929	0.814447	0.412383	blue
Q4V9L6	0.227196	-0.0459893	-0.34301	0.448434	0.439267	0.023071	-0.262643	-0.116883	-0.127884	0.165775	0.586249	grey
P08069	-0.474296	0.295872	0.275985	-0.259662	-0.210507	-0.203189	0.0915572	0.175985	-0.0125704	-0.128518	-0.470919	grey
Q14183	0.233396	0.140338	0.51651	-0.312008	-0.19531	0.101876	0.495872	-0.335835	-0.11651	-0.576923	-0.326829	grey
Q8IV38	0.477486	0.294747	0.621013	-0.394747	-0.241276	-0.328705	0.113321	-0.511069	-0.00600375	-0.472795	-0.30863	yellow
P51797	-0.526266	0.515385	0.135084	-0.155722	0.0424015	-0.165666	-0.000938086	0.397749	-0.227767	-0.220826	-0.30469	turquoise
O14594	0.04803	-0.455722	-0.526829	0.437523	0.211069	0.607129	0.145966	0.266041	0.140338	0.420075	0.518949	blue
Q68CZ2	-0.164165	-0.255347	-0.44878	0.517073	0.380863	-0.0290807	-0.484615	0.0208255	-0.269981	0.25985	0.503377	grey
Q7L5N1	0.158724	-0.520263	-0.415385	0.323265	0.182927	0.266792	-0.174296	0.180863	0.383865	0.614822	0.39925	blue
Q96CW1	0.590807	-0.019137	0.522514	-0.351782	-0.230394	0.139587	0.529268	-0.571295	0.0622889	-0.471482	-0.161914	red
Q9Y4D8	-0.144737	0.369028	0.432389	-0.449595	-0.206275	-0.0427126	0.40587	0.011336	-0.0546559	-0.340486	-0.588259	grey
Q9H6X2	-0.258537	0.164728	0.0628518	0.144653	-0.0371482	-0.277861	-0.0324578	0.0467167	-0.250281	-0.174859	-0.0697936	grey
Q9Y2I1	-0.501689	-0.0855535	-0.41651	0.144653	0.230769	0.466229	0.24728	0.707505	0.1394	0.283114	0.0266417	green
P56537	-0.0253675	-0.409673	-0.119488	-0.0334282	-0.40019	0.189663	0.0815552	0.229018	0.480797	0.227596	-0.0142248	grey
P54727	0.109756	-0.311632	0.0894934	-0.145966	-0.449343	-0.126829	-0.0842401	0.0883677	0.727955	0.355535	-0.195685	black
O75608	0.0913696	-0.540338	-0.498874	0.210131	0.172983	0.520263	0.0178236	0.20788	0.313884	0.566229	0.358912	blue
P07225	0.135835	0.0958724	0.011257	0.387992	0.125516	-0.242026	-0.227017	-0.286116	-0.36773	-0.242402	0.330769	grey
Q9NTJ5	-0.123077	0.786492	0.422139	-0.246529	-0.0868668	-0.363977	0.0397749	-0.106191	-0.432645	-0.693809	-0.328518	turquoise
Q9Y5L0	0.117636	0.231895	0.3197	-0.0874296	-0.0703565	-0.235084	0.0371482	-0.20394	-0.271482	-0.396998	-0.140901	grey
Q9BVC6	-0.629644	0.557223	-0.0011257	-0.015197	0.0551595	-0.172983	-0.0617261	0.568293	-0.210507	-0.197936	-0.26454	turquoise
P48506	0.120826	-0.615009	-0.722889	0.564165	0.315947	0.523827	-0.0500938	0.262101	0.333021	0.713133	0.632458	brown
Q8TDC3	0.351012	0.389069	0.651012	-0.483401	-0.280364	-0.184211	0.35668	-0.484413	-0.0890688	-0.593725	-0.416397	yellow
O00534	-0.223482	-0.211538	-0.493522	0.549798	0.477126	0.0421053	-0.223279	0.355466	0.0724696	0.438057	0.439069	blue
Q86YR5	-0.127733	-0.00708502	-0.0663968	0.168623	0.147773	-0.177935	-0.183401	-0.0495951	-0.291093	0.100607	0.181984	grey
P62917	0.170356	-0.0771107	-0.0977486	0.239775	0.165478	-0.10394	-0.204503	-0.246717	-0.210507	0.00393996	0.410131	grey
O15394	0.205066	-0.427955	-0.0502814	-0.0348968	-0.193809	0.196811	0.273171	-0.017636	0.432833	0.309944	-0.0166979	grey
Q08380	0.25272	-0.28743	-0.347092	0.24728	0.0223265	0.575422	0.19531	-0.0277674	0.25272	0.276923	0.418199	magenta
Q9BTX7	0.181818	-0.213439	0.436759	-0.326087	-0.656126	0.120553	0.37747	-0.0899209	0.534585	-0.0780632	-0.31917	grey
O15144	-0.238649	-0.513696	-0.50394	0.272233	0.0682927	0.351032	-0.101501	0.498874	0.66379	0.794747	0.189493	blue
Q9BQI5	0.120638	-0.307505	-0.00243902	-0.128518	-0.367355	0.121201	0.0716698	0.0733583	0.776735	0.397936	-0.136398	black
Q9Y6K8	-0.00600375	0.435272	0.722326	-0.62364	-0.275797	-0.443527	0.0613508	-0.270356	-0.10788	-0.533583	-0.64015	yellow
P22748	0.373358	-0.349906	0.2394	-0.043152	-0.273546	-0.222889	-0.0101313	-0.370544	0.232458	-0.0165103	-0.0654784	grey
Q6NXT6	-0.414822	0.640901	0.186492	-0.179737	-0.0168856	-0.0208255	0.204878	0.16773	-0.414447	-0.470732	-0.357411	turquoise
P14384	-0.172045	-0.397936	-0.636398	0.757974	0.36454	0.207692	-0.259662	0.237523	-0.224015	0.358537	0.628893	brown
Q9BWH6	-0.0796586	0.167378	0.329303	-0.216453	-0.407539	-0.425794	-0.0870081	-0.236131	0.0561878	-0.263395	-0.367473	grey
P51116	-0.313929	0.391837	0.208447	-0.157019	-0.229018	-0.239961	0.103622	0.161834	-0.125068	-0.315461	-0.285699	grey
P24534	0.300375	-0.170356	0.138649	-0.202627	-0.32045	0.186867	0.23546	-0.233583	0.105816	-0.0401501	-0.126454	grey
Q9BRQ6	-0.528893	0.825328	0.250657	-0.287617	0.272795	-0.373921	-0.0780488	0.177861	-0.506379	-0.399437	-0.403189	turquoise
Q9BXJ0	0.0769795	-0.357038	-0.481672	0.541422	0.165323	0.177053	-0.178152	0.109238	0.0197947	0.419721	0.486437	grey
Q9UMF0	0.143152	0.183677	0.759287	-0.613696	-0.606754	-0.434709	0.146904	-0.260038	0.351407	-0.328143	-0.698124	yellow
Q12791	0.0574109	0.247842	0.412008	-0.264916	-0.185553	-0.134146	0.305253	-0.137899	-0.0116323	-0.378799	-0.310882	grey
P53621	-0.262852	0.71576	0.686116	-0.618949	-0.356285	-0.256473	0.285366	-0.0953096	-0.367917	-0.774484	-0.724953	turquoise
Q9NP78	-0.176165	0.469213	0.0661574	0.0166539	0.252559	0.0970206	0.17861	0.0270435	-0.314591	-0.191444	-0.0808251	grey
Q9NQW6	0.0424015	-0.333771	-0.422139	0.167542	0.027955	0.78743	0.490244	0.285366	0.22758	0.341651	0.225704	magenta
Q9UI10	0.562289	0.141651	0.324015	-0.0307692	-0.144653	-0.294559	-0.169043	-0.603002	-0.115385	-0.266417	0.0724203	grey
P56199	0.172045	-0.188931	-0.23152	0.559099	0.0606004	0.0251407	-0.173171	-0.132645	-0.0722326	0.0727955	0.473546	brown
A5YKK6	-0.627017	0.257786	-0.228143	0.045591	0.39137	0.0136961	-0.0232645	0.435647	-0.0949343	0.0838649	-0.0621013	grey
Q63HR2	0.0645749	-0.37915	-0.41417	0.555466	0.277126	0.0048583	-0.381377	0.0232794	-0.00283401	0.319636	0.547571	grey
O15143	-0.106191	-0.267917	-0.541651	0.604128	0.263977	-0.0493433	-0.398124	0.311257	0.111445	0.461726	0.47167	blue
A0A804F6T5	0.196998	-0.698499	-0.234334	0.0123827	-0.382552	0.412758	0.145779	0.091182	0.835084	0.674672	0.0699812	black
P10909	-0.00150094	-0.165103	-0.461538	0.59606	0.308818	0.0703565	-0.30863	0.135084	-0.153096	0.249531	0.620075	grey
P01602	0.360813	0.0671937	0.182383	-0.00846979	-0.112366	-0.242236	-0.0570299	-0.13834	0.0457369	-0.111237	0.189159	grey
P78344	-0.00187617	-0.245403	-0.494559	0.41182	0.39606	0.206567	-0.202251	0.058349	-0.196811	0.227767	0.543527	grey
P45954	0.0966229	-0.445591	-0.569794	0.575422	0.519512	0.0699812	-0.326454	0.0011257	-0.101126	0.483114	0.606191	blue
P52943	-0.131895	-0.302627	-0.157411	0.0669794	-0.0908068	-0.257223	-0.426079	0.22364	0.403752	0.421764	0.0354597	blue
P16930	-0.233959	-0.364728	-0.491557	0.541088	0.16848	-0.153096	-0.598311	0.268293	0.205816	0.649719	0.396811	blue
Q92621	-0.0395872	0.118199	-0.125704	0.367917	0.189493	-0.14728	-0.243715	-0.0500938	-0.324953	-0.0639775	0.305629	grey
P27144	-0.429081	0.267542	-0.478987	0.447842	0.883677	-0.0163227	-0.325328	0.378799	-0.457036	0.110131	0.383114	pink
P27361	-0.00825516	-0.0981238	0.00318949	0.0795497	0.0185741	-0.20075	-0.221201	-0.0258912	0.169418	0.0318949	-0.0262664	grey
Q99653	-0.19212	0.376548	0.314071	-0.241651	-0.106004	0.0782364	0.449343	0.136961	-0.0649156	-0.405629	-0.380863	purple
Q96QE2	0.184991	0.266792	0.785178	-0.576548	-0.48743	-0.544653	0.00844278	-0.461914	-0.036773	-0.509944	-0.621388	yellow
P05771	-0.236773	0.521201	0.598874	-0.761726	-0.299062	-0.0981238	0.438837	0.0288931	-0.0360225	-0.502064	-0.802814	turquoise
Q99758	-0.38002	0.598205	0.209542	-0.0848014	0.18328	-0.241055	-0.0138965	0.058978	-0.614619	-0.434511	-0.280446	turquoise
P53602	-0.452991	-0.0926496	-0.53641	0.501538	0.565128	-0.0516239	-0.357265	0.507009	-0.144615	0.402393	0.366838	pink
Q6UX71	-0.320075	0.0896811	-0.192683	0.407129	0.0938086	-0.33621	-0.355159	0.182176	-0.294934	0.039212	0.16379	brown
Q9UPQ0	-0.268726	-0.101416	-0.284427	0.0646075	0.19305	0.339768	0.137709	0.415701	0.0589447	0.245045	0.0190476	grey
Q07065	0.10788	0.61651	0.34015	-0.209006	-0.026454	-0.33546	-0.0666041	-0.37955	-0.451407	-0.532083	-0.175047	turquoise
P05362	-0.19531	-0.273358	-0.494934	0.635647	0.326079	-0.149343	-0.440713	0.169981	-0.174109	0.364916	0.511069	blue
P13073	-0.237336	0.92045	0.469606	-0.399625	0.22045	-0.363602	0.0577861	-0.112383	-0.538086	-0.673171	-0.435084	turquoise
Q16890	0.113077	-0.183846	-0.326154	0.466923	0.205385	-0.0723077	-0.47	-0.0253846	0.0576923	0.272308	0.433846	grey
Q16698	0.199062	-0.453659	-0.568856	0.525704	0.348593	0.11257	-0.329831	0.0309568	0.214822	0.695685	0.66773	blue
Q7L1I2	0.435835	0.314071	0.919887	-0.654034	-0.490244	-0.451782	0.157036	-0.619137	0.0956848	-0.599062	-0.560413	yellow
Q68DK2	0.00109469	-0.0645868	-0.27422	0.587849	0.501368	-0.322934	-0.555556	-0.121511	-0.311987	0.162562	0.512315	grey
P29692	0.0954972	-0.515009	-0.408818	0.16454	0.0425891	0.160976	-0.264728	0.110131	0.418199	0.664165	0.350844	blue
Q5VW32	-0.469981	-0.171295	-0.602251	0.561726	0.427392	0.217073	-0.171295	0.59531	-0.19925	0.292683	0.383114	brown
P20936	-0.356285	0.321201	0.00337711	-0.135647	0.0617261	0.0510319	0.210882	0.487617	0.161351	-0.147842	-0.243902	grey
P32119	0.436585	-0.710507	-0.455159	0.372233	0.0298311	0.251407	-0.234522	-0.0861163	0.602064	0.775235	0.511445	blue
P25789	-0.0463415	-0.298687	-0.50863	0.237711	0.0465291	0.301313	-0.146154	0.393433	0.5	0.621013	0.247467	blue
P09493	-0.000375235	-0.434334	-0.435084	0.280863	0.0545966	0.0928705	-0.351407	0.22758	0.452908	0.662289	0.290994	blue
P48735	-0.133771	-0.463977	-0.785929	0.578987	0.643715	0.348405	-0.265103	0.385366	0.0681051	0.737899	0.623827	blue
O75874	-0.377861	-0.452908	-0.681238	0.482176	0.209568	0.179737	-0.318199	0.55197	0.307692	0.816135	0.380113	blue
P22059	0.200375	0.0851782	0.297561	-0.217261	-0.234709	0.225704	0.498311	-0.202064	0.0288931	-0.4	-0.24334	grey
Q10472	-0.163707	0.23269	0.0540541	0.159846	0.131532	-0.297555	-0.331274	0.0208494	-0.249678	-0.17323	0.0555985	grey
Q99436	-0.0712946	-0.580113	-0.617636	0.575235	0.137148	0.31182	-0.222326	0.356098	0.373921	0.67561	0.556473	blue
O75521	-0.206435	0.118404	-0.316602	0.029601	0.116088	0.320978	0.110682	0.262033	-0.0851995	0.16036	0.115315	grey
P00568	0.00243902	-0.571295	-0.766041	0.666041	0.430019	0.249156	-0.377861	0.160225	-0.0187617	0.676548	0.757036	brown
Q92835	0.0758653	-0.32385	-0.544808	0.662162	0.486249	-0.115932	-0.467994	-0.0680417	-0.220958	0.35799	0.729256	brown
Q6ZPD9	-0.249156	0.727767	0.348593	-0.120638	0.0641651	-0.511632	-0.142026	-0.0795497	-0.485366	-0.613321	-0.295685	turquoise
P15880	0.322326	-0.0288931	-0.0690432	0.223077	0.119137	-0.20469	-0.329268	-0.109568	0.0378987	0.0266417	0.337336	grey
Q7L523	-0.722326	-0.0347092	-0.445591	0.222889	0.302627	0.0906191	-0.19606	0.674672	-0.00919325	0.440338	0.00994372	green
P21359	-0.168856	0.508255	0.637711	-0.598687	-0.313696	-0.207505	0.334334	-0.193621	-0.284991	-0.587805	-0.675985	turquoise
O00592	0.536023	0.0114447	0.296811	-0.0767355	-0.0864916	-0.0587242	0.0600375	-0.528705	0.0153846	-0.293809	0.0589118	grey
Q02318	-0.162709	0.0961812	-0.375205	0.330999	0.526863	0.139074	-0.123536	0.0777984	-0.455739	0.0966189	0.329905	grey
Q8IWQ3	0.00919325	0.582176	0.87636	-0.759662	-0.474296	-0.465291	0.194184	-0.248405	-0.0326454	-0.717448	-0.838462	yellow
Q86UW7	0.258907	0.219433	0.57247	-0.494534	-0.327328	-0.128947	0.180972	-0.321255	0.195142	-0.351822	-0.442105	grey
P27708	0.222702	0.0712946	0.0534709	0.267917	0.147842	-0.209756	-0.254972	-0.204128	-0.185178	-0.181801	0.266229	grey
Q9BXW7	-0.0756283	0.0455192	-0.311048	0.303698	0.587245	0.133001	-0.0312945	0.0701754	-0.311759	0.09578	0.297534	grey
Q02641	0.430631	0.139768	0.466409	-0.256371	-0.0712999	-0.318404	0.0574003	-0.578893	-0.0223938	-0.349292	-0.196911	yellow
Q9NUQ2	-0.0981238	0.505816	0.115572	0.101876	0.345966	-0.434522	-0.263977	-0.276548	-0.702064	-0.413133	0.0969981	turquoise
Q8IZ81	0.399497	0.253529	0.197068	-0.0935551	0.0850202	-0.239961	-0.0491301	-0.459678	-0.0600722	-0.208666	0.124631	grey
Q96DB2	0.00469043	0.0298311	0.149906	-0.438274	-0.14728	0.650844	0.820263	0.00375234	0.0238274	-0.243152	-0.324953	purple
P51692	0.0530957	0.021576	-0.0559099	0.242589	0.250844	-0.093621	-0.063227	-0.351407	-0.362664	-0.181989	0.233583	grey
P35244	-0.0967521	0.174017	0.115897	-0.12	0.0133333	-0.00854701	0.0283761	0.0502564	-0.0933333	-0.0837607	-0.148034	grey
Q9UQN3	-0.0412518	-0.15908	-0.123044	0.156709	0.0289237	0.086771	-0.128734	0.127074	0.0353248	0.12091	0.129682	grey
Q99832	0.330769	-0.000750469	0.311445	-0.356473	-0.29212	0.28424	0.346341	-0.287054	0.258912	-0.238837	-0.223077	grey
Q08499	0.25614	-0.2	0.1	-0.0719298	-0.0122807	-0.314035	-0.0192982	-0.261404	0.115789	0.0859649	-0.0596491	grey
P69892	0.0236808	-0.0916345	-0.246332	0.0841699	0.146461	0.0365508	-0.137967	0.0851995	0.180438	0.240412	0.236551	grey
Q02108	0.263227	-0.378612	-0.243527	0.536773	0.21257	-0.197749	-0.371295	-0.116135	0.0934334	0.217261	0.453846	brown
Q9NQT4	-0.269322	0.184448	-0.113087	0.129445	0.362257	-0.129208	-0.148886	0.299431	-0.151494	0.0860597	0.0163585	grey
Q9BZ23	0.206229	0.0126808	0.385095	-0.162625	-0.365072	-0.145717	0.0331479	-0.132369	0.0789766	-0.212013	-0.195996	grey
P35609	0.390244	-0.206942	0.198311	-0.0187617	-0.0493433	-0.0866792	0.0878049	-0.36379	0.0902439	-0.12045	0.107692	grey
Q13085	-0.295122	0.569794	0.203377	-0.314259	0.0587242	-0.0551595	0.16848	0.271107	-0.113696	-0.304315	-0.317073	turquoise
P20073	0.485366	-0.252533	-0.187805	0.499812	0.161914	-0.294934	-0.548968	-0.437899	-0.226642	0.0966229	0.581614	brown
O94956	0.256285	-0.362664	-0.350094	0.565854	0.252158	0.0292683	-0.363602	-0.246529	-0.190807	0.236585	0.596623	brown
Q14677	-0.229456	0.105066	-0.0842401	0.301501	0.289118	-0.381051	-0.430582	-0.0448405	-0.430394	-0.109381	0.210507	grey
O00241	-0.536134	0.241558	0.18686	-0.250726	-0.211001	-0.134912	0.149274	0.445989	0.113827	-0.116578	-0.563942	grey
P04440	0.0457369	-0.369848	-0.354037	0.524562	0.158667	-0.20271	-0.478261	-0.16996	-0.261434	0.17109	0.551666	brown
P14324	0.127392	-0.485553	-0.451407	0.226829	-0.0311445	0.280488	-0.152158	0.267542	0.578236	0.686867	0.347655	blue
P08572	0.00750469	-0.215385	-0.386679	0.536398	0.136023	0.165666	-0.133208	0.054409	-0.129081	0.121764	0.515009	grey
P63162	-0.159099	-0.235084	-0.476923	0.332833	0.335084	0.483677	0.063227	0.366979	-0.115385	0.293809	0.362289	grey
O95167	0.365103	0.507505	0.35272	-0.307692	0.223265	-0.138086	0.0636023	-0.5	-0.319325	-0.484803	-0.0666041	turquoise
P60842	-0.424203	0.254034	-0.313884	0.219887	0.363227	0.117824	-0.021576	0.378799	-0.521576	-0.0600375	0.117448	grey
Q9ULH1	0.0930769	-0.0630769	-0.0892308	0.267692	0.205385	-0.166154	-0.293846	-0.257692	-0.276154	-0.0215385	0.309231	grey
A0MZ66	0.140525	-0.509006	-0.653846	0.537711	0.450657	0.329081	-0.237523	0.0697936	0.0861163	0.649531	0.654597	blue
Q9HBL0	0.501126	-0.226079	-0.144841	0.307317	0.0943715	0.0861163	-0.170919	-0.315009	0.120638	0.110507	0.46848	grey
Q14118	-0.361726	-0.0260788	-0.232645	0.326829	0.130394	-0.00356473	-0.162664	0.390244	-0.0714822	0.124203	0.113696	grey
P51659	-0.412195	0.17167	-0.354784	0.290807	0.305066	-0.163602	-0.340525	0.443152	-0.0427767	0.315009	0.12439	grey
Q9NTI2	0.326642	0.171857	0.674296	-0.44015	-0.359662	-0.521013	-0.122139	-0.510507	0.201313	-0.375422	-0.402814	yellow
Q13492	-0.0249531	-0.217824	-0.259287	0.277111	0.110507	0.131895	-0.154597	0.158724	0.270356	0.252908	0.231144	grey
Q96GR2	-0.136398	0.363039	0.180113	-0.12439	0.101313	-0.157223	0.0572233	0.0183865	-0.478987	-0.334709	-0.183114	grey
O14910	-0.27636	0.377298	0.33227	-0.294934	-0.203002	-0.436023	-0.154409	-0.0135084	-0.270169	-0.244465	-0.374296	grey
Q9HAP6	-0.0974026	-0.357143	-0.422078	0.28961	0.166234	0.336364	-0.0818182	0.312987	0.333766	0.501299	0.342857	blue
Q92932	0.386585	0.0285589	0.657293	-0.411314	-0.435824	-0.469745	-0.090929	-0.496881	0.0920232	-0.361856	-0.376956	yellow
Q9P1Z2	0.445817	0.20592	0.419305	-0.21879	-0.0952381	-0.271815	-0.0504505	-0.448391	-0.0525097	-0.428057	-0.126898	grey
P15529	0.328518	-0.296623	-0.299625	0.522514	0.290432	0.0401501	-0.281238	-0.330019	-0.102814	0.156285	0.628705	brown
Q6GTX8	0.435574	-0.106443	-0.280952	0.387675	0.397199	-0.192997	-0.42605	-0.236134	-0.0893557	0.208123	0.602241	grey
P08571	0.140901	-0.151032	-0.371295	0.563227	0.168856	-0.0221388	-0.221576	0.0251407	-0.0986867	0.197373	0.469794	brown
Q6NUM9	0.0097166	0.214777	0.316802	-0.0554656	-0.0987854	-0.407895	-0.147976	-0.219028	-0.105061	-0.268016	-0.158907	grey
Q9H1E3	0.143697	-0.4507	-0.168627	0.0985994	-0.110924	0.121008	-0.136134	0.00868347	0.310084	0.338095	0.114846	grey
P61981	0.476735	-0.391932	0.111632	-0.110882	-0.28424	0.0315197	0.0506567	-0.407129	0.295872	0.115947	0.0990619	grey
Q9H0R4	-0.417448	-0.273358	-0.6197	0.459099	0.368856	0.15122	-0.193246	0.663227	0.266979	0.654784	0.298874	blue
P02749	0.183865	0.0285178	0.0849906	0.292683	0.0275797	-0.376735	-0.275422	-0.205066	-0.0988743	-0.162101	0.228705	grey
Q13363	0.635835	-0.35272	0.17955	-0.217073	-0.263227	0.293246	0.273921	-0.38349	0.37167	0.00750469	0.00750469	grey
A5YM72	-0.229081	0.0962477	0.0686679	-0.424578	-0.114071	0.459662	0.530019	0.240525	-0.017636	-0.0384615	-0.423265	purple
Q9NP79	0.129081	-0.154784	-0.310131	0.211069	0.231332	0.218949	-0.147467	-0.00919325	0.137711	0.344841	0.258912	grey
Q9BSA4	0.102439	-0.24878	-0.388931	0.26454	0.219512	0.490807	0.263415	0.0908068	0.119512	0.301126	0.327205	grey
Q07075	0.256885	-0.116088	-0.179923	0.295238	-0.12973	-0.307079	-0.327928	-0.255856	0.0108108	0.111197	0.249678	grey
P12694	-0.374291	-0.126316	-0.709717	0.571255	0.739474	0.0253036	-0.324089	0.402227	-0.191296	0.501215	0.482591	pink
O43598	0.0529915	-0.552137	-0.26359	0.405128	-0.0242735	0.25265	-0.0331624	0.00991453	-0.085812	0.201368	0.355214	grey
Q9BXM9	-0.0557678	0.0634072	0.137051	-0.17861	-0.00351413	0.114133	0.118105	0.154469	-0.0741024	-0.0551566	-0.161803	grey
Q6PCE3	0.118949	-0.517073	-0.236961	0.171482	-0.0485929	0.217073	-0.109006	0.220263	0.679737	0.585553	0.165103	black
P62195	0.283302	0.24728	0.616323	-0.338649	-0.346904	-0.320263	0.0898687	-0.518574	-0.113884	-0.427955	-0.38818	yellow
Q96IU4	-0.26454	-0.318011	-0.79212	0.753471	0.527767	0.139587	-0.449156	0.486116	-0.0731707	0.570356	0.660413	brown
P11387	0.352446	-0.179122	-0.0524127	0.0324981	-0.0373126	0.0837072	0.0138965	-0.240398	0.138637	0.107999	0.182186	grey
P62191	0.292308	0.0855535	0.419887	-0.144465	-0.0682927	-0.336023	-0.0482176	-0.483865	-0.0924953	-0.394559	-0.150657	grey
Q9NVE7	-0.0234522	0.239024	0.315009	-0.306754	-0.194371	-0.0575985	0.276548	-0.0868668	-0.0103189	-0.354409	-0.314259	grey
P78357	0.262289	-0.0859287	0.233021	-0.446717	-0.322702	0.661163	0.876548	-0.0977486	0.280488	-0.146154	-0.277486	purple
O00487	-0.44409	0.19531	-0.0992495	0.0613508	0.0932458	0.12045	0.124953	0.383865	-0.439962	-0.232833	-0.0619137	grey
P68366	-0.271482	0.573921	0.577674	-0.719137	-0.390807	0.0727955	0.5606	0.210319	0.00731707	-0.565666	-0.778799	turquoise
Q06481	0.0530176	0.224752	0.436516	-0.292895	-0.317953	-0.432544	0.0832697	-0.239114	0.0239878	-0.371123	-0.389458	grey
Q92845	-0.137523	0.447655	0.399062	-0.260038	-0.223827	-0.263977	0.178236	0.0465291	-0.126454	-0.393433	-0.426266	grey
O94973	0.317261	0.162101	0.584053	-0.498499	-0.321951	0.121388	0.544278	-0.315572	0.0793621	-0.542589	-0.401689	yellow
Q9NQR4	-0.0388368	-0.509006	-0.164916	0.0348968	-0.28743	0.181989	0.0818011	0.258724	0.622514	0.478424	0.0110694	blue
O75689	0.477861	-0.097561	0.30788	-0.245779	-0.17242	-0.134522	-0.00469043	-0.330769	0.251595	-0.102064	-0.0634146	grey
P43378	0.187805	0.390807	0.839775	-0.515197	-0.478049	-0.61182	0.024015	-0.419887	-0.0307692	-0.611445	-0.610319	yellow
Q9NP58	-0.481801	0.31651	-0.0769231	0.263602	0.0831144	-0.321013	-0.305816	0.341839	-0.335647	-0.160038	0.0183865	grey
Q6AZY7	0.410256	0.125153	0.1337	0.100733	-0.0579976	-0.404762	-0.326007	-0.589133	-0.230769	-0.228938	0.235653	grey
Q9P2D3	-0.119962	0.319346	0.48862	-0.520152	-0.337601	-0.350403	0.170934	-0.107871	0.0109056	-0.352537	-0.570175	grey
Q9Y5J5	-0.0484626	-0.0641711	-0.321524	0.0588235	0.0407754	0.187166	0.0621658	0.0992647	0.14238	0.267045	0.0845588	grey
Q9H1V8	0.050469	0.518011	0.777298	-0.488368	-0.330582	-0.582364	0.0977486	-0.230394	-0.0675422	-0.644653	-0.567167	yellow
Q08722	0.956098	-0.347655	0.315572	-0.103752	-0.260225	-0.0467167	0.0939962	-0.820638	0.24878	-0.0812383	0.179174	red
P29401	-0.333396	-0.503189	-0.706004	0.508255	0.233959	0.190432	-0.358724	0.518574	0.341463	0.870919	0.442214	blue
O60826	-0.420638	-0.172795	-0.603002	0.635835	0.478799	0.124953	-0.229831	0.448218	-0.247092	0.371482	0.439024	brown
P49721	0.10469	-0.698874	-0.625141	0.506004	0.130019	0.309756	-0.229081	0.184053	0.453471	0.820638	0.533021	blue
P25788	0.286492	-0.832083	-0.558724	0.488743	0.00675422	0.347092	-0.217636	0.0380863	0.495122	0.801689	0.568856	blue
P55058	-0.415992	0.00161943	-0.29919	0.240688	0.22085	-0.0593117	-0.32166	0.282794	0.0445344	0.252834	0.160324	grey
Q7L5Y9	0.160103	0.0236808	0.325869	-0.252252	-0.292921	-0.148777	0.188417	-0.196911	0.118919	-0.166023	-0.307079	grey
P45985	0.312383	0.472983	0.845216	-0.665103	-0.380863	-0.366792	0.233208	-0.503002	0.0133208	-0.657036	-0.610319	yellow
Q9UPT5	-0.329831	0.322139	-0.101501	0.0806754	0.225328	0.0472795	0.109381	0.21257	-0.392308	-0.132083	-0.0159475	grey
P49588	-0.0469043	0.039212	-0.109193	0.0529081	0.143527	-0.0221388	-0.156848	0.109006	-0.136398	0.147842	0.153659	grey
Q96C23	-0.217418	-0.247364	-0.511383	0.429183	0.334759	0.121161	-0.288617	0.329565	-0.0964095	0.410848	0.358289	brown
Q969M1	-0.238462	0.797749	0.45985	-0.365291	0.193433	-0.354597	-0.00637899	-0.000750469	-0.458912	-0.580863	-0.435084	turquoise
Q71U36	-0.610694	0.503189	0.15122	-0.365478	-0.0915572	0.100938	0.333208	0.666417	0.0842401	-0.217824	-0.557974	green
P20472	-0.247947	-0.364532	-0.361795	0.045977	-0.165298	0.244663	0.0114943	0.430213	0.359606	0.473454	0.0733443	blue
Q9NWV8	-0.0857143	0.074026	-0.0233766	0.0363636	-0.0337662	-0.214286	-0.0155844	-0.012987	-0.2	0.0181818	-0.0220779	grey
P00738	-0.128518	-0.437148	-0.518199	0.438649	0.105629	0.333021	-0.116323	0.355347	0.346341	0.550469	0.385366	blue
Q8IYJ1	0.215415	0.140316	0.397233	-0.567194	-0.0148221	0.00395257	0.0859684	-0.166996	-0.0306324	-0.199605	-0.261858	grey
Q86YQ8	-0.366229	0.582176	0.425328	-0.35122	-0.247842	-0.323265	0.0624765	0.201689	-0.125516	-0.429081	-0.541088	turquoise
O95741	-0.0688555	0.209756	0.413508	-0.146154	-0.109381	-0.483114	-0.0763602	-0.235084	-0.367355	-0.385178	-0.319325	grey
O14980	-0.130394	0.273358	0.168856	-0.308443	0	-0.0714822	0.197561	0.13546	-0.0684803	-0.274484	-0.317073	grey
P04406	-0.0964353	-0.62439	-0.491182	0.221388	-0.133021	0.431895	-0.0133208	0.379362	0.629831	0.799625	0.195497	blue
Q8NBR6	-0.338828	0.12149	0.0891331	-0.194139	-0.041514	-0.282662	-0.224054	0.0683761	0.0531136	-0.00976801	-0.326007	grey
Q8NBF6	0.0371482	0.271482	0.635272	-0.40788	-0.281238	-0.586116	-0.190619	-0.188931	0.103002	-0.411257	-0.488931	yellow
O75153	-0.19531	0.309006	0.418386	-0.585929	-0.322514	0.0926829	0.511445	0.138837	0.0889306	-0.300938	-0.628893	turquoise
O14522	0.0490451	-0.105577	0.225668	-0.182277	-0.294118	-0.0139037	0.245531	-0.132162	0.339037	-0.0817418	-0.199694	grey
Q9UFN0	0.222928	-0.35361	-0.436832	0.379011	0.14639	-0.0170455	-0.416778	0.157086	0.300134	0.53008	0.427473	blue
P82675	-0.594737	0.205263	-0.282456	0.345614	0.0736842	-0.163158	-0.349123	0.55614	-0.196491	0.0596491	0.126316	grey
O96011	-0.465478	0.562477	0.301313	-0.451782	-0.113884	0.0570356	0.315385	0.247842	-0.0422139	-0.308255	-0.609756	turquoise
P01591	-0.217503	-0.0682111	-0.344402	0.306049	0.0468468	0.0329472	-0.201802	0.300901	0.0749035	0.206692	0.18713	grey
P60981	0.315197	-0.222326	0.195685	-0.255159	-0.372608	-0.18349	-0.145403	-0.265854	0.278236	0.0819887	-0.0756098	grey
Q9UKU7	-0.309944	-0.0532833	-0.28349	0.393246	0.420263	0.0521576	-0.0318949	0.350657	-0.0928705	0.229644	0.261351	grey
Q9H0B6	0.405066	-0.00506567	0.20394	-0.249906	-0.171295	0.0658537	0.140901	-0.403752	0.0300188	-0.140525	0.00375234	grey
P05067	-0.451782	0.0350844	-0.247655	0.0333959	0.201501	0.166604	0.0172608	0.58743	0.118199	0.227955	-0.0290807	grey
Q7Z4W1	-0.0142589	-0.463227	-0.653471	0.502814	0.29212	0.131332	-0.338649	0.215385	0.0827392	0.522139	0.55666	blue
Q96FQ6	0.0846154	-0.258161	-0.226454	0.459475	0.272608	-0.0403377	-0.0754221	-0.1803	-0.271857	0.0559099	0.34878	grey
P21399	0.0639775	-0.623265	-0.69137	0.661914	0.263415	0.189493	-0.439962	0.236398	0.378236	0.832458	0.647842	blue
Q02818	-0.0558704	-0.118826	-0.119231	0.059919	-0.142915	0.0283401	-0.131781	0.0852227	0.341093	0.339879	-0.0868421	grey
Q5EBM0	-0.2524	0.274986	-0.0920384	-0.0254094	0.689441	-0.145116	-0.0988142	0.307736	-0.347261	-0.0434783	-0.0434783	pink
Q9GZN7	0.552908	0.119887	0.798874	-0.558161	-0.415009	-0.306004	0.274109	-0.65666	0.135084	-0.495872	-0.415009	yellow
Q9NZL9	-0.223452	-0.401689	-0.328893	0.0829268	-0.0684803	0.291557	0.027955	0.392683	0.358912	0.577486	0.0622889	blue
Q9Y2C4	0.0780488	0.454597	0.42758	-0.179362	-0.113884	-0.550657	-0.0500938	-0.315197	-0.195685	-0.430769	-0.203002	grey
Q9Y281	-0.118574	-0.264353	-0.193809	-0.297186	-0.272983	0.570169	0.305253	0.34015	0.571857	0.44803	-0.204878	black
P23528	-0.214447	-0.491182	-0.478236	0.128893	-0.0660413	0.282739	-0.15197	0.490994	0.645216	0.804878	0.145966	blue
Q15738	-0.0228745	0.478947	0.357692	-0.403036	-0.230769	-0.284818	0.0945344	-0.102024	-0.0635628	-0.356073	-0.41417	grey
Q8NI60	-0.493522	0.519231	-0.0487854	-0.0724696	0.47996	-0.0852227	-0.0313765	0.293927	-0.582389	-0.218016	-0.176518	turquoise
Q8IXI2	-0.293809	0.754784	0.545216	-0.525328	-0.14409	-0.237148	0.240338	0.125141	-0.152345	-0.564728	-0.685929	turquoise
P06744	0.297561	-0.764165	-0.537523	0.374109	0.0765478	0.354597	-0.187054	0.0478424	0.488555	0.769231	0.526266	blue
Q9Y265	-0.314634	0.669043	0.385366	-0.239212	-0.114071	-0.33227	0.0742964	0.0499062	-0.336398	-0.521951	-0.404878	turquoise
O75155	0.263869	0.210052	0.424372	-0.286392	-0.0637743	-0.0865339	0.22404	-0.209104	0.266951	-0.148649	-0.267188	grey
Q9Y394	0.0594747	0.517636	0.321201	-0.325328	-0.123077	-0.121951	0.0842401	-0.194934	-0.392308	-0.515572	-0.223265	turquoise
P01009	0.119887	-0.330769	-0.294747	0.290807	-0.0287054	0.173171	-0.160038	0.129831	0.384803	0.433583	0.294559	grey
Q8IW45	0.0210131	-0.608255	-0.589118	0.40075	0.125516	0.257411	-0.281801	0.318199	0.475985	0.82758	0.400563	blue
Q9NY65	0.405629	0.345216	0.482739	-0.347467	0.00412758	-0.271295	0.032833	-0.500375	-0.106942	-0.413133	-0.169231	grey
Q9Y2T3	0.312008	-0.5394	-0.0298311	0.0440901	-0.281614	-0.0778612	-0.208818	-0.101689	0.77955	0.524015	0.064728	black
O60749	-0.204315	-0.46379	-0.759662	0.67636	0.367167	0.259475	-0.323827	0.441276	0.103565	0.65591	0.573734	brown
Q6ZN44	-0.108978	0.459063	0.420666	-0.557312	-0.114625	0.00169396	0.361942	-0.10559	-0.501976	-0.472614	-0.498588	turquoise
P43490	-0.205629	-0.111257	-0.335647	0.551595	0.218386	-0.172983	-0.457036	0.0420263	-0.34334	0.0973734	0.350281	brown
Q9NXU5	-0.485366	0.586116	0.382364	-0.355722	-0.0639775	-0.275797	0.169231	0.302627	-0.266792	-0.496623	-0.561726	turquoise
Q13200	-0.0228893	0.109193	0.266792	-0.145028	-0.127205	-0.050469	0.221201	-0.233771	-0.2803	-0.315009	-0.239775	grey
O00170	-0.27636	0.0956848	-0.281426	0.248405	0.185178	-0.1	-0.264353	0.352158	-0.0337711	0.0787993	0.125704	grey
Q96FC7	0.0469043	-0.464916	-0.466417	0.170732	0.0362101	0.432645	0.133583	0.082364	0.170169	0.434522	0.301501	grey
O75896	0.236842	0.245951	0.695749	-0.637449	-0.443725	-0.0720648	0.414575	-0.361134	-0.0226721	-0.505466	-0.54251	yellow
P14550	-0.502439	-0.245966	-0.796435	0.617448	0.484803	0.249156	-0.315385	0.709944	0.0645403	0.670919	0.493246	brown
Q8NEB9	-0.041651	0.350844	0.404503	-0.34803	-0.2197	0.035272	0.440525	-0.125704	-0.173171	-0.536961	-0.415197	grey
Q9NR46	0.445779	-0.16454	0.338649	-0.469043	-0.454784	-0.0945591	0.0786116	-0.304128	0.546341	0.064728	-0.252908	black
Q13724	0.275422	0.274296	0.249906	-0.0639775	-0.0108818	-0.181989	-0.0268293	-0.232083	-0.176548	-0.35272	0.036773	grey
Q7L5N7	0.542026	0.0330206	0.174859	0.251407	0.0446529	-0.418574	-0.286116	-0.577861	-0.233771	-0.255722	0.330582	grey
Q9P0M2	-0.0131332	0.0651032	0.173358	0.0956848	0.0771107	-0.545216	-0.304878	-0.237148	-0.0928705	-0.0988743	-0.0332083	grey
Q15057	0.241379	-0.313904	-0.0829811	0.207564	-0.254727	0.160845	0.0731924	-0.256952	-0.0487208	-0.00867631	0.199555	grey
Q9UKV8	0.125367	-0.263196	-0.103006	0.0971408	-0.0923754	0.22434	0.249267	0.0604839	0.120235	0.104472	0.126833	grey
P04004	0.125891	-0.0452158	0.0155722	0.212195	-0.064728	-0.0287054	-0.021576	-0.237899	-0.184615	-0.184053	0.19925	grey
Q12906	0.0307692	-0.558724	-0.732645	0.582552	0.423452	0.457036	-0.130957	0.200375	0.0562852	0.653283	0.633583	blue
O14490	0.0453846	0.195385	0.33	-0.472308	-0.0392308	-0.147692	0.0669231	-0.0361538	0.238462	0.03	-0.346154	grey
Q9HB21	0.346753	0.21039	0.112987	0.0220779	0.0142857	0.107792	-0.00649351	-0.298701	-0.0961039	-0.220779	0.135065	turquoise
Q9Y365	0.318548	0.209677	0.328079	-0.394428	-0.0766129	0.0135631	0.250367	-0.477639	-0.101906	-0.354472	-0.142229	grey
P41217	-0.0958724	0.21576	0.312946	-0.530019	-0.219325	0.220075	0.621201	0.200188	0.294559	-0.135272	-0.499625	purple
O60268	-0.0257036	0.0953096	0.409381	-0.32833	-0.274672	-0.303002	-0.0360225	-0.0752345	0.319325	-0.108443	-0.388368	grey
Q9UGM6	-0.431721	0.221195	-0.207681	0.123044	0.677098	-0.0431484	-0.178284	0.268137	-0.418682	-0.000474158	0.117828	pink
P28331	0.234709	0.694934	0.546904	-0.419325	0.0923077	-0.318762	0.0968105	-0.50863	-0.489118	-0.698687	-0.281614	turquoise
Q04917	0.180488	-0.560976	-0.246341	0.266229	-0.00769231	-0.112758	-0.474484	-0.125328	0.314634	0.550094	0.315947	blue
P27348	-0.197373	-0.525516	-0.333021	-0.0275797	-0.213321	0.325328	-0.0307692	0.307129	0.533208	0.659099	0.0198874	blue
P31946	0.043152	-0.49212	-0.150844	0.0557223	-0.17242	-0.1	-0.283865	-0.0958724	0.377111	0.49137	0.130582	blue
P49770	-0.276409	0.355227	-0.15052	0.117679	-0.0224412	-0.262178	-0.292282	0.323481	-0.206349	-0.0257252	0.0279146	grey
Q13325	-0.0795497	0.211257	-0.0238274	-0.0105066	0.312195	0.0232645	0.0103189	-0.0275797	-0.424765	-0.167542	-0.00694184	grey
A2AAZ0	-0.121053	0.0614035	-0.350877	0.266667	0.478947	0.201754	-0.0473684	0.466667	0.117544	0.345614	0.291228	grey
Q9H3H3	0.636398	-0.413696	0.140713	-0.0896811	-0.266792	0.203002	0.279174	-0.552158	0.217261	-0.0754221	0.199437	red
Q8N3P4	0.174296	0.193809	0.341276	-0.184991	-0.247842	-0.186492	0.00281426	-0.246341	-0.0731707	-0.398311	-0.155347	grey
P20645	0.521053	0.0831984	0.362146	-0.0777328	-0.0874494	-0.438057	-0.161741	-0.717611	-0.0724696	-0.293522	0.0048583	grey
Q93034	0.377674	-0.694747	-0.532083	0.359099	0.127955	0.478236	-0.0651032	0.0465291	0.567542	0.715009	0.546154	blue
Q9NPA0	0.47955	0.368856	0.328143	-0.260038	-0.0330206	-0.0405253	0.141463	-0.518386	-0.252345	-0.409193	-0.0611632	turquoise
P21281	0.228893	0.395872	0.921576	-0.726079	-0.564353	-0.36848	0.309193	-0.346341	0.149719	-0.643527	-0.726454	yellow
Q4G176	-0.541651	0.459287	-0.167355	0.0778612	0.693996	-0.117261	-0.229268	0.384053	-0.369231	-0.00750469	0.0101313	pink
Q9GZT4	-0.35272	0.00487805	0.0212008	0.0714822	-0.111632	0.019137	-0.0212008	0.149719	-0.157036	-0.136585	-0.0821764	grey
Q00839	0.00952381	0.379151	0.677477	-0.560618	-0.421364	-0.143887	0.440927	-0.184299	0.0254826	-0.503732	-0.642728	yellow
Q02978	-0.381989	0.920826	0.382176	-0.329081	0.267542	-0.375422	0.0262664	0.1197	-0.486116	-0.570919	-0.416323	turquoise
Q9NRQ2	-0.363415	-0.115385	-0.312008	0.476548	0.244841	-0.122514	-0.136773	0.349156	-0.166604	0.153096	0.230019	grey
O75915	-0.0097561	0.0924953	-0.269231	0.226454	0.00919325	0.211445	0.030394	0.22758	-0.0878049	0.0525328	0.179362	grey
Q9NUQ9	-0.263227	0.0476548	-0.00900563	-0.253096	-0.0247655	0.375047	0.407317	0.428893	0.328143	0.120075	-0.347467	grey
Q9UGP8	-0.312195	0.675235	0.171107	-0.110319	0.159099	-0.291557	-0.0727955	-0.0146341	-0.563039	-0.494934	-0.180863	turquoise
Q12913	-0.363977	0.109381	-0.232833	0.454972	0.357786	-0.324203	-0.451407	0.26773	-0.348218	-0.0159475	0.2197	brown
Q15654	-0.0904315	-0.282927	-0.3606	0.37242	0.182364	-0.0476548	-0.405629	0.036773	-0.00337711	0.313133	0.300375	grey
P19086	0.566229	0.141651	0.716323	-0.635835	-0.514822	-0.124765	0.416698	-0.550469	0.267917	-0.39137	-0.472608	yellow
C9J0J7	-0.442589	0.0934334	-0.346341	0.126454	0.214259	0.222326	-0.0097561	0.609193	-0.162664	0.14878	0.0140713	grey
Q99624	-0.0185741	-0.142777	-0.220826	0.446717	0.277298	0.0166979	-0.0230769	-0.0236398	-0.303002	0.00938086	0.364353	grey
P05026	-0.0596623	0.0461538	0.164916	-0.434146	-0.196248	0.558912	0.865666	0.0966229	0.0662289	-0.228143	-0.334146	purple
Q9ULB1	-0.183302	0.0654784	0.148405	-0.216323	-0.0140713	-0.00694184	0.227767	0.20394	0.283302	0.101689	-0.265478	grey
Q9Y4C0	0.199437	-0.0514071	0.346529	-0.275235	-0.182176	-0.0313321	0.331707	-0.198874	0.409006	-0.0557223	-0.275797	grey
Q9Y6A4	-0.215133	0.681536	0.2524	-0.265951	0.41502	-0.0367024	0.401468	-0.00395257	-0.570864	-0.636364	-0.234331	turquoise
A0A140T997	0.349802	0.120553	0.006917	0.0602767	-0.0405138	0.0810277	0.00889328	-0.302372	-0.211462	-0.0662055	0.178854	grey
P10321	0.0581026	0.00951964	0.181749	0.0454098	-0.181311	-0.292702	-0.274975	-0.201882	-0.112594	-0.134697	0.0432214	grey
Q13501	-0.248405	-0.0369606	-0.561351	0.533021	0.441088	0.0547842	-0.279362	0.326642	-0.186679	0.287805	0.555347	grey
P51398	-0.579978	0.338821	-0.256507	0.175083	0.492325	0.0367075	-0.112792	0.558621	-0.439377	-0.0527253	-0.0371524	turquoise
O15145	-0.0140713	-0.581051	-0.492495	0.35197	-0.0395872	0.346154	-0.0247655	0.322326	0.445779	0.575235	0.353846	blue
Q8N3J6	0.560413	-0.254034	0.380113	-0.508443	-0.506942	0.293621	0.612383	-0.368856	0.47636	-0.0579737	-0.256285	purple
O14949	-0.129456	0.806754	0.303002	-0.227955	0.341088	-0.301689	-0.0142589	-0.162477	-0.618574	-0.583865	-0.219137	turquoise
P54136	-0.370169	0.218949	-0.252345	0.285741	0.376173	-0.142589	-0.343715	0.225516	-0.469231	-0.0380863	0.189493	grey
O94779	0.166422	-0.365836	0.249633	-0.235337	-0.580279	-0.0234604	0.255132	-0.179619	0.296554	-0.0520528	-0.166422	grey
P02743	0.177372	0.0683882	-0.03403	0.475654	0.102309	-0.322683	-0.447204	-0.2288	-0.188533	-0.100996	0.393369	grey
Q8N5N7	-0.301891	0.264071	0.00912125	0.0580645	0.412681	-0.199555	-0.174194	-0.0580645	-0.509232	-0.176418	-0.0509455	grey
O00303	-0.112008	-0.0444653	0.131144	-0.272045	-0.221013	0.148218	0.410131	0.124578	0.091182	-0.0465291	-0.230206	grey
Q96JG6	0.115947	0.418386	0.613508	-0.417261	-0.199812	-0.325328	0.211257	-0.237523	-0.0990619	-0.540901	-0.442964	yellow
P17813	-0.0673546	-0.0968105	-0.488555	0.656285	0.217073	0.0454034	-0.265666	0.192683	-0.137523	0.214259	0.563415	brown
Q96HU8	0.144841	0.42364	0.830582	-0.786492	-0.540338	-0.277674	0.367355	-0.366979	0.0559099	-0.632458	-0.774672	yellow
Q86VB7	0.131895	-0.261726	-0.430019	0.609006	0.204128	-0.0485929	-0.406754	-0.0348968	-0.0198874	0.275985	0.551782	brown
P62979	0.32833	-0.482552	-0.176548	0.0772983	-0.179737	0.116135	-0.242964	-0.172608	0.428893	0.476548	0.259287	blue
P10915	-0.0902439	-0.38424	-0.601501	0.474672	0.304128	0.546154	0.0641651	0.361538	0.0114447	0.396998	0.530394	blue
O43237	0.0733583	-0.0420263	0.0101313	-0.168856	-0.316323	0.231144	0.233959	0.140525	0.275047	-0.0120075	-0.161914	grey
P05556	0.142589	-0.403002	-0.570356	0.841088	0.375047	0.0818011	-0.36773	-0.11651	-0.278612	0.290056	0.81576	brown
P30086	-0.223265	-0.293433	-0.290619	-0.0741088	-0.274109	0.218574	-0.0170732	0.541651	0.620263	0.598311	-0.0521576	blue
Q04760	-0.553096	-0.214071	-0.545216	0.230394	0.208443	0.176923	-0.154221	0.783114	0.445403	0.699625	0.088743	green
O60861	0.384615	0.18818	0.615009	-0.483114	-0.360413	-0.0108818	0.45985	-0.57636	-0.0669794	-0.593621	-0.415009	yellow
P62834	-0.307692	-0.425891	-0.767542	0.704315	0.399625	0.34409	-0.190432	0.389306	-0.138462	0.521576	0.538274	brown
P21980	0.279925	0.05197	0.199812	-0.230019	-0.199625	0.238086	0.22833	-0.286867	-0.00412758	-0.267542	-0.030394	grey
P20336	0.357974	-0.418574	0.278236	-0.229081	-0.503189	-0.0956848	-0.00825516	-0.19212	0.738274	0.226642	-0.173171	black
Q9H4A3	0.463977	0.0133208	0.466229	-0.305066	-0.300938	-0.22045	0.0258912	-0.474296	-0.0386492	-0.34878	-0.202251	grey
O95197	0.0842401	0.136585	0.186304	-0.341463	-0.25272	-0.118011	-0.0262664	0.113321	0.446341	0.075985	-0.295872	grey
P17252	-0.0765478	0.224953	0.331895	-0.0654784	-0.178236	-0.294559	0.0448405	-0.222514	-0.385929	-0.425328	-0.274109	grey
O14639	-0.106379	-0.292683	-0.457974	0.375047	0.37636	0.321576	-0.0756098	0.275422	0.0159475	0.461914	0.345403	grey
Q9BY67	-0.154784	-0.157223	0.255347	-0.314634	-0.38743	-0.109006	0.189306	0.131332	0.474859	0.113321	-0.452158	grey
P35555	0.00303644	-0.209312	-0.540688	0.724291	0.578745	0.0722672	-0.368623	0.102429	-0.164575	0.364372	0.660931	brown
Q9Y6M5	0.23227	-0.0855535	-0.15591	0.464353	0.288555	-0.132083	-0.183114	-0.209568	-0.305816	-0.0236398	0.497749	brown
Q8N1I0	0.193058	0.429644	0.538649	-0.303002	-0.16773	-0.297936	0.118762	-0.365103	-0.286492	-0.56454	-0.370732	grey
P08174	0.465291	-0.33621	-0.140338	0.334897	-0.113508	0.130582	-0.0307692	-0.367355	0.10075	0.116886	0.454784	grey
Q7Z3B1	0.347467	-0.292308	0.271295	-0.185741	-0.49212	0.0202627	0.315197	-0.246529	0.550094	0.0508443	-0.167167	grey
P40429	0.418574	-0.164165	-0.0395872	0.1394	0.287617	-0.0148218	-0.134709	-0.331144	-0.208255	0.0114447	0.394747	grey
Q96GA7	-0.44251	-0.0257085	-0.485223	0.48502	0.528543	0.112753	-0.102834	0.437854	-0.400405	0.12247	0.382389	brown
Q9UBB6	0.324578	0.231144	0.659099	-0.73546	-0.530206	0.0409006	0.455159	-0.423452	0.186679	-0.462477	-0.622514	yellow
Q99572	-0.0105066	-0.270544	-0.211069	0.0977486	0.0707317	0.281051	0.251595	0.149531	0.27167	0.234334	0.134522	grey
Q15818	0.269231	-0.340338	0.104878	-0.0675422	-0.164165	-0.283677	-0.29925	-0.141276	0.621576	0.375985	-0.0439024	black
Q02156	0.189493	0.35197	0.841651	-0.826266	-0.588368	-0.199812	0.374484	-0.46454	0.108068	-0.56773	-0.763977	yellow
O95299	-0.0195122	0.85591	0.579737	-0.514822	0.0521576	-0.495685	0.0228893	-0.289493	-0.403002	-0.653659	-0.457036	turquoise
P04003	0.348593	0.0292683	0.113508	0.286304	-0.0350844	-0.221388	-0.128143	-0.448593	-0.292495	-0.290056	0.30788	grey
P0DP58	0.417448	-0.17561	0.263227	-0.421951	-0.447842	0.537148	0.637336	-0.262289	0.230769	-0.20075	-0.256473	purple
O95163	-0.104858	0.353239	0.326113	-0.0682186	-0.0481781	-0.294939	0.0587045	-0.117814	-0.146356	-0.373684	-0.248785	grey
P62633	0.451613	-0.299853	0.0047654	-0.101173	-0.471408	0.0535191	0.0377566	-0.167155	0.36217	0.16349	0.0487537	grey
O94832	0.0771107	-0.16773	-0.142026	-0.247842	-0.103752	0.862289	0.667917	0.111445	0.254034	0.162289	-0.0857411	magenta
Q9GZV7	-0.231895	-0.164728	-0.638837	0.415572	0.334146	0.614259	0.147467	0.463602	-0.143527	0.319887	0.39606	magenta
Q8WY54	-0.0189493	0.413508	0.599062	-0.391932	-0.373171	-0.454972	-0.0219512	-0.278236	-0.273546	-0.621764	-0.510319	yellow
Q86T03	-0.000938086	-0.251782	0.0298311	-0.0395872	-0.114447	-0.0424015	-0.197186	-0.0542214	0.0969981	0.202814	-0.080863	grey
P62244	0.628893	-0.0257036	0.26848	-0.0628518	-0.138274	-0.0529081	0.0249531	-0.529081	0.050469	-0.201126	0.14015	yellow
Q9NQX7	-0.379174	0.239962	0.118199	-0.0827392	-0.0114447	-0.24409	0.017636	0.0249531	-0.191182	-0.150469	-0.308443	grey
P62079	-0.135393	-0.15444	-0.389704	0.520206	0.405148	0.0620335	-0.343629	0.0831403	-0.245817	0.198198	0.413642	grey
Q99784	0.506004	-0.000938086	0.499625	-0.481989	-0.245779	0.134522	0.574296	-0.47167	0.252345	-0.310131	-0.290619	red
Q16543	0.0508443	-0.409944	-0.320263	0.0915572	-0.109006	0.427205	0.0572233	0.242214	0.585553	0.544841	0.113696	blue
P43007	0.325704	-0.0290807	0.375422	-0.0742964	-0.216886	-0.301876	0.0611632	-0.389681	0.0493433	-0.30075	-0.0731707	grey
P31949	0.369418	-0.484991	-0.304503	0.507129	-0.152908	-0.114259	-0.426642	-0.171857	0.230206	0.37561	0.517824	brown
Q9Y5L4	-0.57996	0.381984	-0.222672	0.234413	0.374291	-0.042915	-0.0378543	0.430972	-0.336032	-0.062753	0.0194332	grey
Q9P2K8	-0.475862	0.457175	0.00200222	0.317464	0.164405	-0.433593	-0.441157	0.157286	-0.503003	-0.372636	0.0126808	turquoise
Q8NDA8	0.213321	0.421764	0.77167	-0.380113	-0.338649	-0.633208	-0.0536585	-0.446341	-0.164728	-0.642777	-0.472608	yellow
Q9UNA1	0.338649	0.366792	0.799062	-0.64409	-0.480863	-0.191745	0.408443	-0.551782	-0.0560976	-0.700375	-0.574109	yellow
P43121	0.145591	-0.246904	-0.189493	0.29137	-0.124765	0.268105	0.0855535	0.0253283	0.0575985	0.058349	0.323827	grey
P02788	0.00549451	0.021978	-0.237485	0.380342	0.403541	-0.112943	-0.194139	0.003663	-0.234432	0.17094	0.357143	grey
P09488	-0.449123	-0.494737	-0.738596	0.461404	0.277193	0.205263	-0.421053	0.747368	0.296491	0.849123	0.307018	grey
P21266	-0.229081	-0.060788	-0.409006	0.16773	0.198687	0.0947467	-0.167167	0.291932	0.0651032	0.416886	0.164916	grey
P43004	0.106942	-0.0356473	0.473171	-0.441839	-0.442214	0.0206379	0.476548	-0.129081	0.276735	-0.263039	-0.427205	grey
P43003	-0.141276	-0.0187617	0.043152	-0.0729831	-0.294371	-0.0776735	0.133959	0.19925	0.265103	0.00318949	-0.171857	grey
P35612	0.361351	-0.485929	0.0262664	-0.102814	-0.393996	0.293246	0.206191	-0.0275797	0.676735	0.276923	0.00206379	black
O43772	-0.0150094	0.166229	-0.374859	0.693621	0.645591	-0.288743	-0.5803	-0.0621013	-0.606754	-0.012758	0.639212	pink
P57737	-0.126518	-0.00121458	-0.173887	0.338664	0.290891	0.0277328	-0.118016	-0.0643725	-0.523887	-0.102227	0.259514	grey
P49755	-0.365103	0.77561	0.193433	-0.0590994	0.229268	-0.179174	0.0320826	0.186116	-0.564165	-0.562289	-0.188743	turquoise
Q8NFQ8	0.43453	-0.206838	-0.113846	0.197265	0.0933333	-0.105641	-0.161709	-0.45641	0.223248	0.200684	0.306667	grey
Q9NTU7	-0.0982456	0.12807	0.0982456	0.0614035	-0.0192982	0.426316	0.533333	0.112281	-0.0403509	-0.322807	-0.0526316	grey
P13639	-0.183114	-0.361351	-0.694934	0.600375	0.50863	0.328705	-0.230769	0.14728	-0.278424	0.390432	0.63621	blue
P10599	0.415947	-0.586116	-0.29606	0.24728	-0.075985	-0.084803	-0.389681	-0.221951	0.393621	0.602627	0.367542	blue
Q9NZJ7	0.204128	0.445591	0.201876	0.0153846	0.252908	-0.468856	-0.248593	-0.415947	-0.534897	-0.354972	0.0756098	turquoise
Q12756	-0.382927	0.352533	0.287242	-0.462852	-0.254409	-0.0590994	0.325141	0.281801	0.0793621	-0.246529	-0.605629	grey
P62306	0.387955	-0.382073	-0.281793	0.334734	0.322409	0.12493	-0.0868347	-0.181232	-0.0470588	0.281232	0.506443	grey
P13473	-0.455347	0.0485929	-0.314259	0.0797373	0.079925	0.194934	-0.0669794	0.436773	0.0774859	0.35272	-0.0333959	grey
Q15942	0.0678138	-0.204858	-0.332794	0.526923	0.153239	-0.290283	-0.515385	-0.0234818	0.0734818	0.318623	0.435223	grey
Q9BZL1	0.494576	-0.208251	0.105882	0.0823529	-0.134607	0.0206264	-0.0847976	-0.400458	0.0297937	-0.023071	0.256532	grey
P17302	-0.0570356	-0.478049	-0.610131	0.681989	0.377674	0.0844278	-0.320638	0.0923077	-0.215385	0.41182	0.6394	brown
P14207	0.10788	-0.369606	-0.298874	0.660788	0.10469	-0.30863	-0.615009	-0.133021	-0.106754	0.227767	0.493246	brown
Q9H1U4	0.151595	-0.00956848	0.0097561	0.293621	0.155347	-0.346904	-0.214634	-0.264353	-0.121951	-0.0163227	0.218949	grey
O00159	-0.0397749	0	-0.27955	0.554597	0.227767	-0.116698	-0.406567	0.109944	-0.198499	0.0217636	0.370544	brown
P62280	0.444278	0.206379	0.412758	-0.20469	-0.202814	-0.18349	-0.00562852	-0.453471	-0.097561	-0.395872	-0.0123827	yellow
P50897	-0.184803	-0.20075	-0.311069	0.0322702	0.00806754	0.27242	-0.108818	0.386304	0.275235	0.45122	0.0917448	grey
Q9NS86	0.365291	-0.0803002	0.445966	-0.457223	-0.353283	0.326829	0.614634	-0.317824	0.156098	-0.411069	-0.285553	grey
P11117	-0.197749	-0.093621	-0.411445	0.328705	0.386116	0.142026	-0.139962	0.340901	0.122514	0.413321	0.265854	grey
P05090	-0.138274	-0.0502814	-0.276735	0.156285	0.0924953	0.101876	-0.253096	0.156473	-0.00694184	0.203565	0.173734	grey
Q9H244	-0.19531	-0.000187617	-0.339212	0.366979	0.390807	-0.127205	-0.413508	0.166417	-0.197186	0.188555	0.367167	brown
Q9UHG3	-0.429456	0.573358	0.0065666	-0.0388368	0.140713	-0.133959	-0.063227	0.378612	-0.243902	-0.2	-0.257223	turquoise
P05106	0.108818	-0.065666	-0.245779	0.542964	0.263415	-0.149156	-0.320075	-0.0560976	-0.179174	0.0557223	0.481989	brown
P48643	0.310319	-0.108818	0.188931	-0.185741	-0.348405	0.206379	0.276548	-0.146154	0.324015	-0.14409	-0.105816	grey
Q9UN36	-0.399625	-0.451407	-0.560225	0.295122	0.188555	0.195122	-0.174672	0.527392	0.255722	0.660038	0.20075	blue
P54652	-0.242402	-0.369981	-0.633583	0.184053	0.141463	0.671482	0.154784	0.475797	0.150844	0.605441	0.239587	magenta
Q06210	-0.113508	-0.00675422	-0.0577861	0.182739	0.178424	-0.027955	-0.063227	0.0461538	-0.361163	-0.145591	0.0251407	grey
Q96JB5	0.0298311	-0.145591	-0.499437	0.71182	0.409568	-0.13546	-0.43546	0.00168856	-0.401126	0.152908	0.669794	brown
O95183	0.106191	-0.421013	-0.520263	0.784803	0.309944	-0.102627	-0.533959	-0.0617261	-0.228518	0.333771	0.696435	brown
O15118	0.0838649	-0.0562852	-0.274859	0.315009	0.391182	0.169231	-0.121576	-0.0307692	-0.095122	0.175422	0.37955	grey
O43866	0.0435006	0.126641	-0.0697555	0.296268	0.216474	-0.26332	-0.324324	-0.102445	-0.153668	-0.0738739	0.336937	grey
Q13526	0.0273921	0.327205	0.288743	-0.327017	-0.0928705	-0.04803	0.253096	0.0821764	-0.0701689	-0.326454	-0.312946	grey
O75077	-0.288555	0.207692	0.0962477	-0.33227	-0.185366	0.50469	0.761163	0.428893	0.183677	-0.170732	-0.417073	purple
P21291	-0.196623	-0.511257	-0.727767	0.37167	0.159287	0.373921	-0.171295	0.459287	0.237899	0.766417	0.417636	blue
Q96IG2	-0.647619	0.185328	-0.106049	0.0252252	-0.00746461	0.172458	0.156499	0.753925	-0.0185328	-0.0216216	-0.203346	green
Q13613	0.467917	0.231707	0.597186	-0.419512	-0.377486	-0.188931	0.267917	-0.482176	0.0621013	-0.441651	-0.313508	yellow
Q9Y693	-0.119298	-0.224561	-0.0982456	0.285965	0.178947	-0.254386	-0.373684	-0.0315789	0.0807018	0.385965	0.0333333	grey
Q96ID5	-0.162477	-0.0307692	0.268856	-0.32833	-0.338086	0.097561	0.470732	0.075985	0.271107	-0.136961	-0.425141	yellow
P17980	0.248968	-0.0300188	0.0487805	0.232458	0.228705	-0.3803	-0.319137	-0.209381	0.0166979	-0.00881801	0.230206	grey
Q9H3G5	0.0478261	-0.0669565	-0.197391	-0.0513043	-0.0521739	0.277391	0.184348	0.153913	0.446087	0.363478	0.00869565	grey
P30050	0.435647	0.0097561	0.239962	-0.067167	-0.0667917	-0.0660413	-0.0110694	-0.380488	-0.142026	-0.231707	0.10788	grey
Q9P0K1	0.00131332	0.0103189	0.188555	-0.422702	-0.315385	0.591557	0.924015	0.0810507	0.164728	-0.185929	-0.368856	purple
Q16720	0.0422139	0.221013	0.665291	-0.665666	-0.569606	-0.041651	0.528893	-0.193433	0.0705441	-0.557036	-0.64409	yellow
Q13424	-0.497749	0.0146341	-0.488555	0.32045	0.324015	0.261163	0.0377111	0.507317	-0.262664	0.119137	0.202627	grey
Q9NXA8	-0.237523	0.357411	-0.0778612	-0.0142589	0.292495	-0.0296435	-0.169418	0.161538	-0.354972	-0.125328	0.00712946	grey
P53992	-0.558912	0.612758	0.2394	-0.328143	-0.0409006	-0.174296	0.117261	0.256285	-0.349156	-0.496998	-0.486116	turquoise
Q8N4L2	0.368826	-0.196356	-0.202429	0.312955	0.260931	-0.0771255	-0.368016	-0.254453	-0.0817814	0.21417	0.476113	grey
O15455	-0.310729	-0.0380567	-0.465385	0.553846	0.392713	0.0360324	-0.399595	0.17004	-0.333198	0.184615	0.395951	brown
P13224	0.000334225	0.0832219	-0.129011	0.17246	0.188503	0.106283	0.0497995	0.195521	0.00635027	0.0451203	0.138035	grey
P41594	0.0718574	0.147092	0.434897	-0.401876	-0.347842	-0.069606	0.343715	-0.225704	0.112195	-0.258161	-0.377111	grey
P23142	-0.204503	-0.153846	-0.515572	0.534709	0.18424	-0.072045	-0.358537	0.281238	-0.0345216	0.306567	0.446717	grey
Q9P0L0	-0.240901	0.263602	0.0688555	-0.0829268	0.056848	-0.106567	-0.00243902	0.18349	-0.204128	-0.193621	-0.121388	grey
P26232	-0.0990619	-0.393996	-0.410694	0.193246	0.205629	0.367167	0.147842	0.30075	0.304503	0.489118	0.205066	grey
P31689	0.0365854	0.358912	0.321388	-0.313508	-0.169043	-0.0885553	0.218011	-0.0821764	-0.244465	-0.481614	-0.235084	grey
Q9Y3F4	-0.241839	-0.192683	-0.216135	0.0163227	-0.114447	0.291182	0.14878	0.437148	0.447467	0.411632	-0.0724203	grey
Q16537	-0.0969981	0.0476548	0.128893	-0.275985	-0.0733583	0.295685	0.32758	0.209944	0.17636	-0.0266417	-0.288368	grey
P35611	0.352533	-0.764165	-0.556285	0.451407	0.127205	0.390432	-0.0876173	0.0125704	0.363977	0.673546	0.619887	blue
P07737	-0.272233	-0.501313	-0.752345	0.4803	0.207129	0.230769	-0.387805	0.529644	0.3394	0.8394	0.488368	blue
O60890	0.263415	0.251595	0.718574	-0.513884	-0.460788	-0.248593	0.265291	-0.498687	-0.0864916	-0.644465	-0.463415	yellow
Q13564	0.118199	-0.53621	-0.362477	0.346341	-0.020075	-0.069606	-0.346717	0.0581614	0.509381	0.683302	0.34878	blue
Q9NWS8	-0.596435	0.766792	0.303189	-0.367355	0.121951	-0.202064	0.0778612	0.450844	-0.282739	-0.426829	-0.562477	turquoise
Q14254	0.475047	0.138462	0.626829	-0.356285	-0.427955	-0.279737	0.158912	-0.413508	0.249906	-0.381989	-0.299625	yellow
Q13630	0.101871	-0.492067	-0.290294	0.401466	-0.11522	-0.139731	-0.393588	-0.114564	0.184375	0.400591	0.339972	grey
Q9BR76	-0.311257	-0.396811	-0.771482	0.552345	0.423265	0.221764	-0.361726	0.503189	0.110319	0.719137	0.543152	blue
P42126	-0.423529	-0.191597	-0.382913	0.138095	0.221569	0.153782	-0.143697	0.466667	0.271989	0.529412	-0.00196078	blue
Q6GYQ0	0.418949	0.0729831	0.413508	-0.459475	-0.384428	0.101313	0.376548	-0.310319	0.157786	-0.228143	-0.358349	grey
O15040	0.218219	-0.225506	-0.0803644	0.0789474	0.175101	0.188866	0.00890688	-0.112348	0.12085	0.14332	0.124291	grey
Q9NVD7	0.120263	-0.456848	-0.626454	0.614259	0.295497	0.220075	-0.302064	0.132645	-0.141651	0.417636	0.694934	grey
Q9NRZ5	0.264353	0.183114	0.339775	-0.348593	-0.134897	0.0320826	0.335835	-0.249906	0.170544	-0.261351	-0.290056	grey
Q9HD45	-0.149906	0.72833	0.518949	-0.267167	-0.0521576	-0.513696	-0.130957	-0.129644	-0.354784	-0.586867	-0.390056	turquoise
Q8TAF3	-0.386867	0.586304	0.463227	-0.464916	-0.181614	-0.0930582	0.426079	0.201126	-0.231332	-0.558349	-0.654221	turquoise
Q8WX93	-0.335014	-0.00672269	-0.161345	0.236695	0.261625	-0.22549	-0.393277	0.148739	-0.240336	0.147339	0.0932773	grey
Q9NYK5	-0.305861	0.429792	-0.230159	0.0982906	0.365079	-0.020757	-0.131258	0.203297	-0.410256	-0.106838	0.0518926	turquoise
Q9UPQ3	0.424578	-0.264165	0.184053	-0.187242	-0.229456	0.168293	0.233959	-0.34334	0.253283	0.0667917	-0.0545966	grey
O75323	0.27167	-0.0849906	-0.0322702	0.130957	0.284991	0.22364	0.232833	-0.305816	-0.434146	-0.218574	0.215385	grey
Q9BPW8	0.388931	0.0118199	0.305441	-0.276548	-0.00187617	0.214447	0.388555	-0.433396	-0.112195	-0.297561	-0.106567	grey
Q13444	-0.201501	-0.208818	-0.200188	0.207317	0.0510319	0.206191	0.162289	0.193246	0.0793621	0.18743	0.0662289	grey
Q8NFW8	0.244653	-0.242589	0.0275797	0.0118199	0.0277674	-0.0439024	-0.082364	-0.326266	0.2	0.203002	0.111632	grey
P62330	-0.433021	0.584053	0.207692	-0.298499	0.0255159	-0.1803	0.0836773	0.153846	-0.446529	-0.478424	-0.400563	turquoise
P11177	-0.149906	-0.0523452	-0.175422	-0.0941839	0.162101	-0.0378987	-0.216698	0.127017	0.22439	0.377111	-0.080863	grey
Q9H0Q0	0.109006	0.209568	0.614822	-0.512946	-0.471295	-0.283302	0.111632	-0.278049	0.0287054	-0.416135	-0.506942	yellow
P25189	0.345813	-0.153202	0.0940887	-0.0788177	0.0921182	-0.0197044	-0.00689655	-0.15665	0.0950739	0.0305419	0.0344828	grey
O75912	0.232771	-0.437317	-0.129765	-0.0293255	-0.0777126	0.707111	0.544355	-0.0227273	0.336877	0.152493	0.0604839	magenta
P07741	0.763431	-0.466681	-0.128789	0.355072	0.0281212	0.0508808	-0.144327	-0.556407	0.0661998	0.159208	0.605646	red
Q6P1M0	-0.80075	0.586492	0.045591	-0.231332	0.097561	0.0542214	0.203002	0.699625	-0.117073	-0.196811	-0.46773	green
P50151	0.012758	-0.0986867	0.0011257	-0.0195122	-0.134334	-0.100375	-0.137711	0.219137	0.192683	0.171482	-0.102627	grey
Q96PC5	-0.0377566	0.229472	0.222874	-0.205279	0.0898094	-0.231672	-0.0150293	-0.114003	-0.157625	-0.220674	-0.22544	grey
Q9NRZ7	-0.0639775	0.57167	0.487242	-0.296248	-0.219512	-0.331707	0.170169	-0.305441	-0.433021	-0.653096	-0.393809	turquoise
Q08209	0.250657	-0.606942	-0.200375	-0.0180113	-0.285366	0.349343	0.122702	0.0849906	0.847092	0.668856	0.0744841	black
P62701	0.101689	0.509944	0.593996	-0.329268	-0.333583	-0.35666	0.0660413	-0.266604	-0.252345	-0.684053	-0.35985	yellow
Q9Y2E4	0.374296	0.315009	0.429644	-0.383677	-0.0981238	0.000938086	0.320075	-0.358724	0.0138837	-0.342214	-0.233021	grey
P05455	0.0979362	-0.240525	0.0298311	0.0217636	-0.296998	-0.275985	-0.267167	-0.167542	0.340525	0.287805	-0.0429644	grey
Q9UQ49	-0.333771	0.129831	0.141276	-0.160976	-0.103752	-0.0131332	0.35591	0.369794	0.0532833	-0.144653	-0.313508	grey
Q96AX2	0.187387	-0.0676963	0.239382	-0.0187902	-0.253797	-0.246075	-0.134878	-0.270013	0.122523	-0.132304	-0.0635779	grey
Q14697	-0.313696	-0.406754	-0.833959	0.723077	0.506942	0.208068	-0.383114	0.543902	0.0619137	0.709756	0.640713	brown
Q14139	-0.574672	0.261914	-0.38743	0.228518	0.35272	0.0354597	-0.032833	0.593809	-0.291932	0.0842401	0.0851782	grey
P20337	0.340909	-0.262032	0.292781	-0.131684	-0.192848	-0.434826	-0.341912	-0.364639	0.370989	0.105949	-0.122326	grey
O15075	-0.228518	0.33546	0.398311	-0.345028	-0.105066	-0.345216	0.0347092	-0.0463415	-0.402439	-0.407317	-0.390244	grey
P01876	0.236773	-0.199625	-0.181614	0.293996	-0.0682927	0.0181989	-0.179737	-0.064728	0.244465	0.22045	0.377486	grey
Q13685	-0.335647	-0.182739	-0.485741	0.55272	0.40788	0.0294559	-0.21651	0.312946	-0.0722326	0.388368	0.416886	grey
O95433	-0.0133208	-0.200563	-0.298687	0.0688555	-0.0125704	0.401689	0.137711	0.22045	0.330769	0.239587	0.181426	grey
O43402	0.411765	0.298797	0.198864	-0.114639	-0.000334225	-0.0868984	0.0675134	-0.383021	-0.0785428	-0.290107	0.0511364	grey
Q13884	0.16454	-0.402627	-0.486867	0.672233	0.581238	0.0166979	-0.378424	-0.137711	-0.201126	0.34878	0.711445	pink
Q8N9I9	0.00308203	0.269322	0.541489	-0.673305	-0.330963	-0.206022	0.184448	-0.205785	0.197961	-0.233286	-0.669512	yellow
P51151	-0.493433	-0.214822	-0.57167	0.478987	0.260413	0.229081	-0.126454	0.57167	0.135647	0.411445	0.275985	green
Q15172	-0.504482	0.102801	-0.243978	0.0207283	0.228571	0.20028	0.158824	0.57507	-0.0229692	0.0210084	-0.144538	green
P49902	-0.0230769	-0.430394	-0.667542	0.75197	0.495497	0.0459662	-0.5197	0.223077	0.0590994	0.598687	0.633583	blue
P18085	0.411445	0.0123827	0.402439	-0.244465	-0.104878	-0.16379	0.211069	-0.443152	-0.0930582	-0.398499	-0.0857411	grey
P61204	-0.079925	-0.427205	-0.217073	-0.0181989	0.0138837	0.617636	0.312195	0.288743	0.248593	0.233208	0.0454034	magenta
Q6P4A7	-0.0609294	0.485301	0.246325	0.0412518	0.421764	-0.214794	-0.027027	-0.142722	-0.536273	-0.432195	0.0045045	turquoise
P62805	0.0266417	-0.192871	-0.443152	0.708068	0.397749	-0.148968	-0.456848	-0.0140713	-0.41576	0.171295	0.635835	brown
Q9BZZ5	-0.0697936	-0.271107	-0.436023	0.0727955	0.217824	0.617261	0.185741	0.324953	0.179925	0.470356	0.161726	magenta
P51648	-0.36773	0.660038	0.141651	0.0938086	0.148405	-0.457598	-0.27636	0.0772983	-0.560788	-0.464728	-0.121388	turquoise
O75531	0.422874	0.369433	0.633401	-0.476923	-0.317004	-0.140081	0.303644	-0.585425	-0.156478	-0.581579	-0.321457	yellow
P60174	-0.107505	-0.576173	-0.321764	0.0380863	-0.234709	0.280675	-0.0245779	0.348593	0.835084	0.744653	0.0739212	blue
Q10567	0.357598	-0.281051	-0.130394	0.114634	0.0307692	-0.0921201	-0.187054	-0.159099	0.313133	0.209568	0.271482	grey
P62166	0.242777	0.116135	0.597186	-0.582176	-0.487242	0.156285	0.626454	-0.284615	0.0791745	-0.49212	-0.54409	yellow
P37235	0.141276	0.107317	0.630769	-0.592495	-0.60394	0.0532833	0.515572	-0.130206	0.389493	-0.342777	-0.633021	yellow
P84074	0.463602	-0.00712946	0.624765	-0.570169	-0.404128	-0.136773	0.253096	-0.409756	0.335647	-0.275047	-0.46773	yellow
Q9UBP4	0.374672	-0.421764	0.00731707	0.0429644	-0.286116	-0.0142589	-0.182927	-0.187242	0.562101	0.366417	0.154784	grey
Q6PJF5	-0.121739	-0.00956522	-0.113913	0.44087	0.188696	-0.115652	-0.347826	0.0330435	-0.325217	-0.14087	0.256522	brown
P28907	-0.142026	-0.206567	-0.0801126	-0.194184	-0.141463	0.333583	0.410882	0.221013	0.188743	0.155159	-0.215385	grey
P25713	0.154972	-0.366604	0.015197	-0.121951	-0.412195	0.194371	0.217636	-0.0268293	0.454221	0.202251	-0.0562852	grey
P07195	-0.225891	-0.549531	-0.577486	0.342402	0.0707317	0.238086	-0.256098	0.472608	0.610319	0.895872	0.281801	blue
Q13224	0.350301	0.180077	0.640394	-0.517789	-0.399562	-0.0908593	0.380405	-0.237001	0.272031	-0.319102	-0.412698	yellow
P10301	0.0692308	-0.422702	-0.560788	0.79212	0.200563	-0.073546	-0.522326	0.110319	-0.0358349	0.361538	0.71257	brown
Q8NFZ8	-0.041651	-0.441839	-0.42833	0.317448	0.142964	0.225516	0.120263	0.148593	-0.058349	0.336585	0.323827	grey
Q96K17	0.414597	0.0620418	0.0935551	0.189627	0.146077	-0.293796	-0.225955	-0.335376	-0.0850202	-0.163366	0.299923	grey
Q4V328	-0.132833	0.619887	0.442589	-0.469418	-0.0626642	-0.22439	0.20469	-0.0185741	-0.0534709	-0.409381	-0.46379	turquoise
P60953	0.372233	-0.488555	-0.0994371	0.278799	-0.0161351	-0.106567	-0.115572	-0.419137	0.00281426	0.154409	0.334897	grey
P09917	-0.0879011	0.346257	0.337233	-0.167781	-0.143717	-0.303476	-0.0441176	-0.15508	-0.210227	-0.400067	-0.265709	grey
P62760	0.168856	-0.049531	0.366041	-0.545966	-0.442777	0.530582	0.863977	-0.121576	0.247092	-0.27636	-0.459475	purple
Q9BX67	0.636398	-0.44878	-0.181238	0.114634	-0.0838649	0.537336	0.256473	-0.24878	0.326829	0.247092	0.371857	red
Q96SW2	-0.141935	0.208871	-0.168548	0.231048	0.377016	-0.263306	-0.295565	0.280242	-0.0995968	0.0560484	0.169355	grey
Q9NV96	0.294934	0.247655	0.794747	-0.418011	-0.41576	-0.645779	-0.0876173	-0.547655	-0.000750469	-0.539962	-0.468105	yellow
O00178	-0.234709	0.374109	0.249531	-0.269794	-0.266229	-0.0375235	0.169606	0.181989	-0.116886	-0.226079	-0.456473	grey
Q8TC07	-0.426642	-0.0193246	-0.560413	0.341839	0.25591	0.215197	-0.0472795	0.587242	-0.138462	0.215572	0.257036	grey
P23470	-0.216194	0.121457	0.22834	-0.244737	-0.161538	0.034413	0.160324	0.109717	0.190688	-0.0690283	-0.351215	grey
Q14BN4	-0.150469	0.0294559	-0.160976	0.233208	0.0803002	-0.146529	-0.184615	0.0326454	-0.285178	-0.0228893	0.123452	grey
Q9P0L2	0.181614	0.51257	0.787054	-0.613884	-0.320075	-0.306379	0.288743	-0.352158	0.0202627	-0.59212	-0.593058	yellow
P21926	0.348405	-0.570919	-0.373734	0.338462	0.0429644	0.566792	0.26848	-0.120638	0.0756098	0.334897	0.507692	magenta
Q6YN16	-0.298687	-0.471857	-0.683865	0.517448	0.476173	0.154034	-0.368105	0.369794	0.14878	0.740713	0.473921	blue
O75110	-0.0228893	0.487805	0.710507	-0.499812	-0.320826	-0.459662	0.141276	-0.241839	-0.0557223	-0.590056	-0.596623	yellow
P63244	0.186679	-0.343715	-0.363039	0.335835	0.0275797	0.177486	-0.238837	-0.0412758	0.00225141	0.288368	0.442026	grey
Q8N9R8	0.266229	0.522889	0.890432	-0.709568	-0.462101	-0.352158	0.278424	-0.445591	0.00994372	-0.727392	-0.661538	yellow
P47756	0.41576	-0.732645	-0.345028	0.257786	-0.107505	0.124578	-0.31576	-0.193621	0.481238	0.687054	0.39137	blue
Q14108	-0.206191	-0.143902	-0.325704	0.236398	0.125328	0.33227	0.126079	0.372045	0.129456	0.313321	0.146341	grey
Q5JSH3	0.492871	-0.421764	0.056848	0.00506567	-0.0688555	-0.0298311	-0.0729831	-0.370732	0.337148	0.179362	0.193809	grey
Q08AM6	0.112383	0.45666	0.780113	-0.730957	-0.456473	-0.284053	0.303377	-0.366604	-0.138837	-0.639212	-0.69212	yellow
Q92783	-0.436398	-0.181801	-0.229081	0.0557223	-0.0900563	0.101313	-0.133021	0.494559	0.366229	0.435647	-0.0666041	blue
O95865	-0.36773	-0.320075	-0.57955	0.396811	0.164353	0.0926829	-0.320826	0.495122	0.184615	0.612195	0.324953	blue
Q9H845	-0.103565	0.22364	-0.250281	0.415197	0.683865	-0.17242	-0.413133	-0.0675422	-0.462101	0.0412758	0.386492	pink
O75170	0.301313	-0.0482176	-0.0639775	0.0405253	0.1197	-0.113133	-0.151782	-0.297186	-0.0097561	0.0876173	0.195122	grey
Q93052	0.0388445	-0.548091	-0.670423	0.524674	0.17015	0.49141	0.0469417	0.197724	-0.0206806	0.386366	0.571507	brown
Q6ZVM7	0.221388	-0.186492	0.0722326	-0.332083	-0.356848	0.360413	0.442402	0.039212	0.596435	0.128705	-0.182364	grey
Q9NR50	-0.226392	0.0983696	0.0467228	0.0320604	0.145202	-0.210636	-0.0972754	0.137542	-0.111938	-0.0981508	-0.0559142	grey
Q9H3N1	-0.506379	0.611069	0.0106942	0.185178	0.300188	-0.243152	-0.161351	0.230019	-0.605629	-0.45985	-0.0427767	turquoise
Q13393	-0.0318949	0.278236	0.103377	-0.109568	-0.0150094	0.266979	0.337148	-0.00825516	-0.161914	-0.3606	-0.104315	grey
Q6PI78	0.17167	0.359662	0.125891	0.0943715	0.415385	-0.552345	-0.467355	-0.307129	-0.228518	-0.129081	0.146717	turquoise
O75475	-0.0651822	-0.303239	-0.148785	-0.139879	-0.197368	0.263563	-0.0133603	0.159312	0.451417	0.38502	-0.0617409	grey
P12236	-0.342105	0.715587	0.311741	-0.236032	-0.012753	-0.34919	0.0469636	0.241903	-0.256275	-0.478745	-0.392713	turquoise
Q9Y2D4	0.284053	0.241651	0.52439	-0.447092	-0.189118	-0.104315	0.268668	-0.377486	-0.00769231	-0.370919	-0.361163	grey
Q13838	-0.688368	0.222139	-0.272795	-0.0682927	0.175047	0.309944	0.0928705	0.799062	0.117448	0.235835	-0.224765	green
O95084	0.0487854	-0.162551	-0.250405	0.274089	0.0453441	0.309312	0.0856275	0.001417	-0.0595142	0.0273279	0.395344	grey
Q96PU5	0.717261	-0.20863	0.396435	-0.228893	-0.359287	-0.019137	0.232458	-0.599437	0.182739	-0.210319	-0.0302064	red
Q13332	0.0487805	0.237336	0.367355	-0.56379	-0.351782	0.228143	0.625328	0.00300188	0.301876	-0.206942	-0.549719	purple
O14939	0.109756	0.0281426	0.0666041	0.235835	0.132083	-0.212946	-0.0592871	-0.249343	-0.478987	-0.215385	0.137336	grey
Q8N6Q3	0.0215385	0.108376	-0.00102564	0.0769231	0.220513	0.0174359	-0.0276923	0.0755556	-0.0276923	-0.0297436	0.130256	grey
O15067	-0.0821764	-0.370732	-0.402439	0.187242	0.208255	0.21182	-0.182927	0.336023	0.512383	0.676548	0.230394	blue
P23284	-0.599625	-0.0718574	-0.463039	0.156848	0.117261	0.240338	-0.132645	0.811257	0.237523	0.490619	0.0270169	green
Q9Y3C6	0.0838649	-0.164353	-0.228893	0.234522	0.211632	0.160038	-0.116886	-0.0542214	-0.127767	0.131332	0.353846	grey
Q13418	0.263227	-0.11182	-0.339587	0.517448	0.280863	-0.0206379	-0.351782	-0.174484	-0.0840525	0.156473	0.572983	brown
Q8TCS8	0.00225141	0.1197	-0.467167	0.472045	0.770732	-0.0857411	-0.466229	0.0727955	-0.254972	0.287054	0.505441	pink
O75489	-0.55272	0.910694	0.30863	-0.333396	0.272233	-0.285929	0.102251	0.293058	-0.486492	-0.553283	-0.463227	turquoise
Q9Y6F6	-0.0815959	0.206178	-0.106306	0.246332	0.206178	-0.039897	-0.0921493	0.218275	-0.160875	0.0033462	0.221107	grey
O15173	0.684991	0.119137	0.262852	0.130394	-0.0562852	-0.363602	-0.20394	-0.72833	-0.3197	-0.370732	0.272233	grey
P62068	-0.303752	0.423077	0.413508	-0.509568	-0.307505	0.110319	0.524015	0.281051	0.0347092	-0.445403	-0.663227	turquoise
O15372	0.455159	-0.127017	-0.0654784	0.160788	0.253096	-0.238837	-0.272983	-0.497561	-0.0585366	0.0746717	0.382552	grey
P56134	-0.726829	0.553846	-0.0540338	-0.106567	0.171107	0.0547842	0.185929	0.739962	-0.187242	-0.165291	-0.333771	green
Q86Y82	-0.428143	-0.310882	-0.603752	0.480488	0.174859	-0.00243902	-0.40469	0.621201	0.178236	0.652908	0.30863	green
P05155	-0.324696	-0.111336	-0.550607	0.3083	0.269838	0.294939	-0.0949393	0.630364	0.316194	0.490486	0.286842	green
O00451	0.111969	-0.160875	-0.161647	0.249678	0.155985	-0.179665	-0.236036	-0.0414414	0.268726	0.228057	0.132304	grey
A2RTX5	-0.276115	-0.338227	-0.498588	0.288538	0.304348	0.345003	-0.0570299	0.239977	0.094297	0.361942	0.242236	grey
Q09470	0.378799	-0.0232645	0.187992	-0.281426	-0.261351	0.498311	0.689869	-0.203189	0.15272	-0.185929	-0.123452	purple
O00264	0.337523	0.321764	0.388555	-0.0195122	-0.164353	-0.446154	-0.198124	-0.372983	-0.149343	-0.426642	-0.0465291	turquoise
P30041	-0.0938086	-0.657974	-0.830394	0.721764	0.394559	0.28818	-0.363602	0.249719	0.0476548	0.76848	0.681989	blue
Q14240	-0.157974	-0.28818	-0.555159	0.27636	0.223265	0.587242	0.104878	0.375797	0.00863039	0.303189	0.36379	magenta
Q9Y4W6	-0.265666	0.709944	0.312758	-0.269606	0.160976	-0.420638	-0.189493	-0.0375235	-0.402439	-0.440901	-0.285929	turquoise
P49815	0.100938	0.306004	0.580675	-0.402814	-0.331895	-0.22045	0.192683	-0.188368	-0.0727955	-0.517261	-0.425516	grey
Q15126	0.360788	-0.0787993	0.108255	-0.0557223	0.0885553	-0.0923077	-0.0602251	-0.416323	-0.250657	-0.0131332	0.0983114	grey
P16435	0.140901	-0.150094	-0.470544	0.594184	0.491745	-0.0707317	-0.49212	0.0534709	-0.145216	0.272045	0.671857	brown
Q96S52	-0.078424	0.400563	0.334709	-0.351407	-0.412758	0.0457786	0.426454	0.00168856	-0.119887	-0.475422	-0.353471	grey
P30040	-0.600188	0.134897	-0.154034	-0.175985	-0.095122	0.148218	0.0701689	0.640525	0.29606	0.265291	-0.349906	green
O14576	0.342964	0.199062	0.557786	-0.484428	-0.556285	-0.0294559	0.430206	-0.309756	0.141088	-0.439962	-0.358912	yellow
P30101	-0.430769	-0.284803	-0.779362	0.649719	0.497749	0.118574	-0.465666	0.603377	-0.0108818	0.630394	0.560038	brown
Q14185	0.377861	0.289493	0.547467	-0.440713	-0.333583	-0.0155722	0.377674	-0.501876	-0.165291	-0.550469	-0.373734	yellow
Q92629	0.176548	-0.390432	-0.430769	0.738837	0.23546	-0.187054	-0.528518	0.00787992	-0.021576	0.35666	0.612008	brown
P51687	-0.222874	-0.178886	0.0714809	-0.150293	-0.243402	-0.0703812	0.0120968	0.250733	0.284091	0.142595	-0.316716	grey
P11047	-0.0189493	-0.229831	-0.531895	0.501876	0.275422	0.317261	-0.0476548	0.117824	-0.11651	0.218949	0.614259	grey
P01871	0.139024	0.0844278	-0.181051	0.360788	0.21257	-0.0626642	-0.287242	-0.132083	-0.136398	0.0242026	0.400563	grey
O75534	-0.112946	0.615572	0.59606	-0.678049	-0.303377	-0.257598	0.134146	-0.144465	-0.125704	-0.543715	-0.618574	turquoise
Q9Y5R8	0.348269	0.124229	0.511143	-0.568516	-0.477477	0.0637743	0.437174	-0.435989	0.0305832	-0.366761	-0.427928	grey
Q92614	-0.0157598	0.562289	0.540525	-0.458537	-0.355347	-0.0485929	0.390432	-0.135647	-0.25666	-0.6394	-0.512758	yellow
O43852	-0.21651	-0.178049	-0.583302	0.651032	0.396435	-0.20863	-0.637711	0.213133	-0.148968	0.451407	0.578236	brown
Q9NW15	-0.512946	0.400375	-0.129831	0.211069	0.288368	-0.0864916	-0.0938086	0.423077	-0.292683	-0.165291	-0.0242026	grey
P09382	-0.0842401	-0.541839	-0.714447	0.639587	0.242026	0.0701689	-0.480675	0.273546	0.120638	0.7803	0.601501	blue
P07602	-0.0857411	-0.580488	-0.734146	0.510882	0.351595	0.35197	-0.25122	0.32439	0.293996	0.823452	0.55122	blue
P33527	-0.361538	0.0819887	-0.313696	0.271857	0.390244	-0.0840525	-0.244653	0.356098	-0.163415	0.0322702	0.17561	grey
Q96JA1	0.0882353	0.0963585	0.0871148	-0.145938	0.00140056	0.215406	0.236415	0.0546218	0.0120448	-0.0361345	-0.128852	grey
P08754	0.0362101	-0.262852	-0.401689	0.597561	0.257786	-0.0679174	-0.301126	-0.0273921	-0.504878	0.0772983	0.499437	brown
O60928	0.247608	-0.181313	0.139933	0.102113	-0.268521	-0.0874305	-0.0816463	-0.0923248	0.0202447	-0.106563	0.0264739	grey
P19525	-0.410507	0.562289	0.310882	-0.220263	-0.00600375	-0.423827	-0.0551595	0.280113	-0.163415	-0.378049	-0.35985	turquoise
Q9Y282	0.326923	0.40081	0.360931	-0.303644	0.0546559	-0.172874	0.0491903	-0.507692	-0.187247	-0.370648	-0.143725	grey
Q9H2X9	-0.217448	0.58349	0.559099	-0.636961	-0.334709	-0.162289	0.412383	-0.0183865	-0.126829	-0.553659	-0.7	turquoise
Q9Y2I8	0.446717	0.188931	0.769043	-0.658349	-0.593621	-0.149156	0.376548	-0.56848	0.0572233	-0.578987	-0.519512	yellow
Q13017	-0.251067	0.0910384	-0.170934	0.315789	0.212897	-0.15505	-0.114983	0.199384	-0.119725	0.0791844	0.19156	grey
P45974	0.0637899	0.297936	0.338837	-0.346529	-0.276548	-0.124578	0.240525	-0.133771	-0.179362	-0.402814	-0.25197	grey
Q13228	-0.248218	-0.4197	-0.69137	0.682176	0.263039	-0.0500938	-0.572608	0.425891	0.157974	0.758349	0.554221	blue
Q8NBF2	-0.424953	-0.237523	-0.726642	0.594934	0.486867	0.345403	-0.131895	0.62758	0.0350844	0.503377	0.420826	brown
P11413	-0.166792	-0.519137	-0.675422	0.571857	0.296623	0.422889	-0.124765	0.42758	0.23227	0.558349	0.508818	brown
Q9UF11	-0.103565	-0.267542	-0.311257	-0.120263	-0.0724203	0.759287	0.458349	0.242964	0.292871	0.29137	0.00187617	magenta
Q13057	-0.358349	0.417448	-0.0690432	0.0581614	0.170732	-0.00375234	0.0658537	0.337148	-0.323265	-0.174296	-0.0363977	grey
O60884	0.421576	0.342589	0.666229	-0.47636	-0.45272	-0.246717	0.241276	-0.614071	-0.140713	-0.634334	-0.337148	yellow
Q07157	-0.213696	-0.393809	-0.566417	0.369418	0.207317	0.351595	0.0382739	0.458537	0.198124	0.536023	0.302627	blue
O94925	-0.270919	0.681426	0.418199	-0.665478	-0.000187617	-0.0964353	0.225516	0.153846	-0.0335835	-0.385741	-0.617636	turquoise
P22105	-0.559033	0.0169603	-0.273662	0.103841	0.135573	0.157895	0.0471605	0.622935	0.130977	0.278696	-0.0587592	green
Q92504	-0.110131	0.312195	0.136961	0.15272	0.0532833	-0.359287	-0.0971857	-0.0836773	-0.364916	-0.329268	0.0493433	grey
P51606	-0.113798	-0.45614	-0.677335	0.584637	0.434566	0.124467	-0.481982	0.21669	0.0481271	0.677098	0.602655	blue
Q8IYQ7	-0.492683	0.481426	-0.073546	-0.191557	0.367917	0.0611632	0.0958724	0.378049	-0.319512	-0.0947467	-0.235272	turquoise
Q9NUN5	0.282991	-0.143328	0.103372	0.0975073	-0.247434	-0.199047	-0.11217	-0.307918	0.0916422	0.0696481	0.0271261	grey
P35573	0.0846154	-0.70469	-0.54334	0.433959	0.0221388	0.385178	-0.133583	0.130206	0.407317	0.741839	0.437711	blue
P25685	-0.0136961	0.154034	0.249906	-0.114071	-0.205629	-0.219137	0.0482176	0.0153846	0.0896811	-0.265854	-0.197373	grey
Q9UDY4	0.0741088	0.364728	0.352533	-0.629081	-0.143715	0.0628518	0.32833	-0.072045	0.182364	-0.2394	-0.454034	grey
P09110	-0.177016	0.174194	-0.071371	0.00524193	0.186694	0.135484	0.0891129	0.210887	-0.189919	-0.0681452	-0.05	grey
Q07955	-0.119888	-0.131933	-0.217367	0.0851541	-0.0705882	0.195798	0.052381	0.192157	0.111485	0.229412	0.0778711	grey
P29350	-0.174672	0.109944	-0.386304	0.621576	0.542964	-0.216135	-0.330394	0.13621	-0.435272	0.0260788	0.496248	brown
P61586	-0.405253	-0.292308	-0.347092	0.230394	-0.106942	0.102064	-0.0277674	0.526079	0.149343	0.346529	0.0506567	green
O95631	0.275315	-0.328407	-0.0996169	0.0711549	-0.258347	-0.0804598	-0.0695129	-0.233169	0.175698	0.272031	0.165846	grey
[truncated: 2,093 more rows]
