# Supplementary material for: Unique lipid cargoes in APOE4 human brain-derived extracellular vesicles recruit cell adhesion molecules and promote tauopathy in Alzheimer’s disease
Source: Research Square preprint supplement (doi:10.21203/rs.3.rs-6508552/v1), 2025-05-26
Supplement: Supplementary file 5 [file f2a2303f6a92fa368ad0c592.xlsx]

## Sheet: all 40 samples
Accession.Number	Genes	Protein.Description	logFC	AveExpr	t	P.Value	adj.P.Val	B
tr|C9J0J7|C9J0J7_HUMAN	PFN2	Profilin OS=Homo sapiens OX=9606 GN=PFN2 PE=1 SV=1	0.94227	7.10883	4.26523	0.00010719	0.33868	0.6503
sp|Q9BZZ2|SN_HUMAN	SIGLEC1	Sialoadhesin OS=Homo sapiens OX=9606 GN=SIGLEC1 PE=1 SV=2	-0.604547	6.20747	-4.14527	0.000165533	0.33868	0.283261
sp|P31942|HNRH3_HUMAN	HNRNPH3	Heterogeneous nuclear ribonucleoprotein H3 OS=Homo sapiens OX=9606 GN=HNRNPH3 PE=1 SV=2	-0.449482	8.39522	-3.83422	0.00041502	0.37787	-0.363927
sp|Q96DD7|SHSA4_HUMAN	SHISA4	Protein shisa-4 OS=Homo sapiens OX=9606 GN=SHISA4 PE=1 SV=3	0.615715	7.59858	3.7864	0.000479072	0.37787	-0.469058
sp|Q9H9S4|CB39L_HUMAN	CAB39L	Calcium-binding protein 39-like OS=Homo sapiens OX=9606 GN=CAB39L PE=1 SV=3	0.491977	7.1177	3.69241	0.000621071	0.37787	-0.643863
sp|Q15056|IF4H_HUMAN	EIF4H	Eukaryotic translation initiation factor 4H OS=Homo sapiens OX=9606 GN=EIF4H PE=1 SV=5	0.398615	7.64219	3.61351	0.000784959	0.37787	-0.816678
sp|P63096|GNAI1_HUMAN	GNAI1	Guanine nucleotide-binding protein G(i) subunit alpha-1 OS=Homo sapiens OX=9606 GN=GNAI1 PE=1 SV=2	0.296772	11.1029	3.57775	0.000872228	0.37787	-0.894469
sp|Q6YP21|KAT3_HUMAN	KYAT3	Kynurenine--oxoglutarate transaminase 3 OS=Homo sapiens OX=9606 GN=KYAT3 PE=1 SV=1	0.396832	6.65216	3.56129	0.000915479	0.37787	-0.93018
sp|Q9BPX5|ARP5L_HUMAN	ARPC5L	Actin-related protein 2/3 complex subunit 5-like protein OS=Homo sapiens OX=9606 GN=ARPC5L PE=1 SV=1	0.393659	7.94311	3.55834	0.000923436	0.37787	-0.936565
sp|Q92526|TCPW_HUMAN	CCT6B	T-complex protein 1 subunit zeta-2 OS=Homo sapiens OX=9606 GN=CCT6B PE=1 SV=5	1.21048	8.84949	3.47314	0.00124831	0.447969	-1.19671
sp|P36405|ARL3_HUMAN	ARL3	ADP-ribosylation factor-like protein 3 OS=Homo sapiens OX=9606 GN=ARL3 PE=1 SV=2	0.399517	7.89049	3.41015	0.00142092	0.447969	-1.25445
sp|P30044|PRDX5_HUMAN	PRDX5	Peroxiredoxin-5, mitochondrial OS=Homo sapiens OX=9606 GN=PRDX5 PE=1 SV=4	0.404758	8.78141	3.37152	0.00158769	0.447969	-1.33627
sp|Q9HB21|PKHA1_HUMAN	PLEKHA1	Pleckstrin homology domain-containing family A member 1 OS=Homo sapiens OX=9606 GN=PLEKHA1 PE=1 SV=2	-0.816143	7.28109	-3.83417	0.00079678	0.37787	-1.37948
sp|P35030|TRY3_HUMAN	PRSS3	Trypsin-3 OS=Homo sapiens OX=9606 GN=PRSS3 PE=1 SV=2	0.489628	10.5473	3.3482	0.00169725	0.447969	-1.38545
sp|Q96IG2|FXL20_HUMAN	FBXL20	F-box/LRR-repeat protein 20 OS=Homo sapiens OX=9606 GN=FBXL20 PE=1 SV=2	0.524653	6.44984	3.35893	0.00175592	0.447969	-1.45681
sp|P51553|IDH3G_HUMAN	IDH3G	Isocitrate dehydrogenase [NAD] subunit gamma, mitochondrial OS=Homo sapiens OX=9606 GN=IDH3G PE=1 SV=1	0.321752	8.0299	3.31407	0.0018706	0.447969	-1.4571
sp|O00505|IMA4_HUMAN	KPNA3	Importin subunit alpha-4 OS=Homo sapiens OX=9606 GN=KPNA3 PE=1 SV=2	0.370426	6.84857	3.2897	0.00200457	0.447969	-1.50805
sp|P51452|DUS3_HUMAN	DUSP3	Dual specificity protein phosphatase 3 OS=Homo sapiens OX=9606 GN=DUSP3 PE=1 SV=1	0.289073	7.95168	3.28095	0.00205483	0.447969	-1.52628
sp|P22102|PUR2_HUMAN	GART	Trifunctional purine biosynthetic protein adenosine-3 OS=Homo sapiens OX=9606 GN=GART PE=1 SV=1	-0.257315	7.14804	-3.23432	0.00234363	0.447969	-1.62309
sp|Q9Y6R0|NUMBL_HUMAN	NUMBL	Numb-like protein OS=Homo sapiens OX=9606 GN=NUMBL PE=1 SV=1	0.336417	7.5474	3.22532	0.00243587	0.447969	-1.66031
sp|Q8NE35|CPEB3_HUMAN	CPEB3	Cytoplasmic polyadenylation element-binding protein 3 OS=Homo sapiens OX=9606 GN=CPEB3 PE=1 SV=2	0.482175	6.166	3.31021	0.00216545	0.447969	-1.66871
sp|P60033|CD81_HUMAN	CD81	CD81 antigen OS=Homo sapiens OX=9606 GN=CD81 PE=1 SV=1	0.583935	8.49292	3.19154	0.00264201	0.447969	-1.71126
sp|P50213|IDH3A_HUMAN	IDH3A	Isocitrate dehydrogenase [NAD] subunit alpha, mitochondrial OS=Homo sapiens OX=9606 GN=IDH3A PE=1 SV=1	0.356902	8.8351	3.19079	0.00264755	0.447969	-1.7128
sp|Q9Y2I1|NISCH_HUMAN	NISCH	Nischarin OS=Homo sapiens OX=9606 GN=NISCH PE=1 SV=3	0.333879	6.56694	3.15421	0.00293143	0.447969	-1.78769
sp|Q9NTX5|ECHD1_HUMAN	ECHDC1	Ethylmalonyl-CoA decarboxylase OS=Homo sapiens OX=9606 GN=ECHDC1 PE=1 SV=2	0.410451	7.8164	3.14547	0.00300334	0.447969	-1.8055
sp|Q08170|SRSF4_HUMAN	SRSF4	Serine/arginine-rich splicing factor 4 OS=Homo sapiens OX=9606 GN=SRSF4 PE=1 SV=2	-0.716178	6.48184	-3.27315	0.00254992	0.447969	-1.82421
sp|Q96DE0|NUD16_HUMAN	NUDT16	U8 snoRNA-decapping enzyme OS=Homo sapiens OX=9606 GN=NUDT16 PE=1 SV=2	0.493248	6.74201	3.11962	0.00326508	0.447969	-1.87438
sp|Q8NCA5|FA98A_HUMAN	FAM98A	Protein FAM98A OS=Homo sapiens OX=9606 GN=FAM98A PE=1 SV=2	0.586213	6.48442	3.10925	0.00335941	0.447969	-1.89517
sp|P61019|RAB2A_HUMAN	RAB2A	Ras-related protein Rab-2A OS=Homo sapiens OX=9606 GN=RAB2A PE=1 SV=1	0.240888	8.83462	3.0652	0.00374677	0.447969	-1.96793
sp|Q8N1G4|LRC47_HUMAN	LRRC47	Leucine-rich repeat-containing protein 47 OS=Homo sapiens OX=9606 GN=LRRC47 PE=1 SV=1	0.248284	7.02624	3.06395	0.0037596	0.447969	-1.97043
sp|P55209|NP1L1_HUMAN	NAP1L1	Nucleosome assembly protein 1-like 1 OS=Homo sapiens OX=9606 GN=NAP1L1 PE=1 SV=1	0.546459	6.85318	3.04107	0.00400216	0.447969	-2.0163
sp|Q96BJ3|AIDA_HUMAN	AIDA	Axin interactor, dorsalization-associated protein OS=Homo sapiens OX=9606 GN=AIDA PE=1 SV=1	-0.423855	6.62547	-3.0484	0.00396691	0.447969	-2.01643
sp|P24311|COX7B_HUMAN	COX7B	Cytochrome c oxidase subunit 7B, mitochondrial OS=Homo sapiens OX=9606 GN=COX7B PE=1 SV=2	-0.598273	9.27555	-3.03678	0.00404922	0.447969	-2.02487
sp|P14406|CX7A2_HUMAN	COX7A2	Cytochrome c oxidase subunit 7A2, mitochondrial OS=Homo sapiens OX=9606 GN=COX7A2 PE=1 SV=1	-1.08452	9.14626	-3.03458	0.0040735	0.447969	-2.02926
sp|Q13636|RAB31_HUMAN	RAB31	Ras-related protein Rab-31 OS=Homo sapiens OX=9606 GN=RAB31 PE=1 SV=1	0.35521	7.08467	3.03091	0.00411439	0.447969	-2.03658
sp|Q6PI48|SYDM_HUMAN	DARS2	Aspartate--tRNA ligase, mitochondrial OS=Homo sapiens OX=9606 GN=DARS2 PE=1 SV=1	0.480663	6.76414	3.04995	0.00404548	0.447969	-2.0471
sp|Q9UHY7|ENOPH_HUMAN	ENOPH1	Enolase-phosphatase E1 OS=Homo sapiens OX=9606 GN=ENOPH1 PE=1 SV=1	0.604287	8.17358	3.02117	0.00422494	0.447969	-2.05602
sp|Q9BSD7|NTPCR_HUMAN	NTPCR	Cancer-related nucleoside-triphosphatase OS=Homo sapiens OX=9606 GN=NTPCR PE=1 SV=1	0.364046	6.77615	3.03416	0.00417086	0.447969	-2.0604
sp|Q92575|UBXN4_HUMAN	UBXN4	UBX domain-containing protein 4 OS=Homo sapiens OX=9606 GN=UBXN4 PE=1 SV=2	-0.456089	6.53014	-3.01149	0.0044858	0.447969	-2.11949
sp|P16219|ACADS_HUMAN	ACADS	Short-chain specific acyl-CoA dehydrogenase, mitochondrial OS=Homo sapiens OX=9606 GN=ACADS PE=1 SV=1	0.463473	7.64212	2.97183	0.00482844	0.447969	-2.15384
sp|Q9NZJ9|NUDT4_HUMAN	NUDT4	Diphosphoinositol polyphosphate phosphohydrolase 2 OS=Homo sapiens OX=9606 GN=NUDT4 PE=1 SV=2	0.296526	7.41684	2.96843	0.00487288	0.447969	-2.16055
sp|P42892|ECE1_HUMAN	ECE1	Endothelin-converting enzyme 1 OS=Homo sapiens OX=9606 GN=ECE1 PE=1 SV=2	-0.354457	7.14387	-2.96692	0.00489279	0.447969	-2.16354
sp|Q9BRG1|VPS25_HUMAN	VPS25	Vacuolar protein-sorting-associated protein 25 OS=Homo sapiens OX=9606 GN=VPS25 PE=1 SV=1	-0.348144	7.43606	-2.95385	0.00506791	0.447969	-2.18928
sp|Q6L8Q7|PDE12_HUMAN	PDE12	2',5'-phosphodiesterase 12 OS=Homo sapiens OX=9606 GN=PDE12 PE=1 SV=2	0.401586	7.02112	2.95406	0.00528826	0.447969	-2.24532
sp|P48059|LIMS1_HUMAN	LIMS1	LIM and senescent cell antigen-like-containing domain protein 1 OS=Homo sapiens OX=9606 GN=LIMS1 PE=1 SV=4	-0.253442	7.34926	-2.92521	0.00547226	0.447969	-2.24544
sp|O75334|LIPA2_HUMAN	PPFIA2	Liprin-alpha-2 OS=Homo sapiens OX=9606 GN=PPFIA2 PE=1 SV=2	-0.356973	6.61407	-3.01795	0.00487007	0.447969	-2.24674
sp|Q9UNM6|PSD13_HUMAN	PSMD13	26S proteasome non-ATPase regulatory subunit 13 OS=Homo sapiens OX=9606 GN=PSMD13 PE=1 SV=2	-0.282108	7.71317	-2.9238	0.00549288	0.447969	-2.24819
sp|P04271|S100B_HUMAN	S100B	Protein S100-B OS=Homo sapiens OX=9606 GN=S100B PE=1 SV=2	1.14171	7.48369	2.93666	0.00541562	0.447969	-2.24853
sp|Q15223|NECT1_HUMAN	NECTIN1	Nectin-1 OS=Homo sapiens OX=9606 GN=NECTIN1 PE=1 SV=3	0.420061	7.3723	2.91564	0.00561392	0.447969	-2.26413
sp|P05067|A4_HUMAN	APP	Amyloid-beta precursor protein OS=Homo sapiens OX=9606 GN=APP PE=1 SV=3	0.354368	8.34274	2.89479	0.00593458	0.447969	-2.30472
sp|P60763|RAC3_HUMAN	RAC3	Ras-related C3 botulinum toxin substrate 3 OS=Homo sapiens OX=9606 GN=RAC3 PE=1 SV=1	0.470827	8.58318	2.89258	0.00596954	0.447969	-2.30902
sp|Q6AZY7|SCAR3_HUMAN	SCARA3	Scavenger receptor class A member 3 OS=Homo sapiens OX=9606 GN=SCARA3 PE=1 SV=1	-0.620626	6.27463	-3.02811	0.00501347	0.447969	-2.31316
sp|Q96EY1|DNJA3_HUMAN	DNAJA3	DnaJ homolog subfamily A member 3, mitochondrial OS=Homo sapiens OX=9606 GN=DNAJA3 PE=1 SV=2	0.415704	7.12267	2.88928	0.00602207	0.447969	-2.31542
sp|Q9Y3Z3|SAMH1_HUMAN	SAMHD1	Deoxynucleoside triphosphate triphosphohydrolase SAMHD1 OS=Homo sapiens OX=9606 GN=SAMHD1 PE=1 SV=2	-0.255815	6.83357	-2.88443	0.00610011	0.447969	-2.32482
sp|P41732|TSN7_HUMAN	TSPAN7	Tetraspanin-7 OS=Homo sapiens OX=9606 GN=TSPAN7 PE=1 SV=2	0.522054	8.01613	2.87235	0.00629869	0.447969	-2.34822
sp|Q9NX14|NDUBB_HUMAN	NDUFB11	NADH dehydrogenase [ubiquinone] 1 beta subcomplex subunit 11, mitochondrial OS=Homo sapiens OX=9606 GN=NDUFB11 PE=1 SV=1	0.687497	6.85159	2.85376	0.00661587	0.447969	-2.38408
sp|Q71U36|TBA1A_HUMAN	TUBA1A	Tubulin alpha-1A chain OS=Homo sapiens OX=9606 GN=TUBA1A PE=1 SV=1	0.656019	8.9043	2.8482	0.00671364	0.447969	-2.39479
sp|P11172|UMPS_HUMAN	UMPS	Uridine 5'-monophosphate synthase OS=Homo sapiens OX=9606 GN=UMPS PE=1 SV=1	-0.270277	6.57526	-2.84676	0.00673921	0.447969	-2.39756
sp|P35527|K1C9_HUMAN	KRT9	Keratin, type I cytoskeletal 9 OS=Homo sapiens OX=9606 GN=KRT9 PE=1 SV=3	-1.43901	8.38296	-2.88605	0.00646867	0.447969	-2.40259
sp|Q16822|PCKGM_HUMAN	PCK2	Phosphoenolpyruvate carboxykinase [GTP], mitochondrial OS=Homo sapiens OX=9606 GN=PCK2 PE=1 SV=4	-0.376078	7.13408	-2.83543	0.00700507	0.447969	-2.42997
sp|Q9UBQ5|EIF3K_HUMAN	EIF3K	Eukaryotic translation initiation factor 3 subunit K OS=Homo sapiens OX=9606 GN=EIF3K PE=1 SV=1	-0.387281	9.14458	-2.81673	0.00735628	0.447969	-2.46543
sp|P67870|CSK2B_HUMAN	CSNK2B	Casein kinase II subunit beta OS=Homo sapiens OX=9606 GN=CSNK2B PE=1 SV=1	0.371234	7.3873	2.79738	0.00767153	0.447969	-2.49202
sp|P63098|CANB1_HUMAN	PPP3R1	Calcineurin subunit B type 1 OS=Homo sapiens OX=9606 GN=PPP3R1 PE=1 SV=2	0.405132	8.44636	2.79698	0.00767938	0.447969	-2.49277
sp|P62068|UBP46_HUMAN	USP46	Ubiquitin carboxyl-terminal hydrolase 46 OS=Homo sapiens OX=9606 GN=USP46 PE=1 SV=1	0.297226	6.87555	2.78636	0.00789532	0.447969	-2.51296
sp|P62280|RS11_HUMAN	RPS11	40S ribosomal protein S11 OS=Homo sapiens OX=9606 GN=RPS11 PE=1 SV=3	-0.268203	8.23608	-2.78517	0.00791965	0.447969	-2.5152
sp|Q07021|C1QBP_HUMAN	C1QBP	Complement component 1 Q subcomponent-binding protein, mitochondrial OS=Homo sapiens OX=9606 GN=C1QBP PE=1 SV=1	0.473925	7.1225	2.771	0.0082171	0.447969	-2.54204
sp|P14543|NID1_HUMAN	NID1	Nidogen-1 OS=Homo sapiens OX=9606 GN=NID1 PE=1 SV=3	-0.310728	7.03456	-2.76645	0.00831482	0.447969	-2.55064
sp|Q05655|KPCD_HUMAN	PRKCD	Protein kinase C delta type OS=Homo sapiens OX=9606 GN=PRKCD PE=1 SV=2	-0.492684	7.01115	-2.86814	0.00747796	0.447969	-2.57436
sp|Q00005|2ABB_HUMAN	PPP2R2B	Serine/threonine-protein phosphatase 2A 55 kDa regulatory subunit B beta isoform OS=Homo sapiens OX=9606 GN=PPP2R2B PE=1 SV=1	-0.421946	6.86269	-2.79923	0.00817421	0.447969	-2.57439
sp|Q96S97|MYADM_HUMAN	MYADM	Myeloid-associated differentiation marker OS=Homo sapiens OX=9606 GN=MYADM PE=1 SV=2	0.509345	7.23506	2.76166	0.00856032	0.447969	-2.57868
sp|O15321|TM9S1_HUMAN	TM9SF1	Transmembrane 9 superfamily member 1 OS=Homo sapiens OX=9606 GN=TM9SF1 PE=2 SV=2	-0.46857	7.21214	-2.79946	0.00826582	0.447969	-2.58702
sp|P62244|RS15A_HUMAN	RPS15A	40S ribosomal protein S15a OS=Homo sapiens OX=9606 GN=RPS15A PE=1 SV=2	-0.350259	8.78373	-2.73686	0.00897694	0.447969	-2.60636
sp|P04216|THY1_HUMAN	THY1	Thy-1 membrane glycoprotein OS=Homo sapiens OX=9606 GN=THY1 PE=1 SV=2	0.303232	11.4954	2.72787	0.0091874	0.447969	-2.6232
sp|P31949|S10AB_HUMAN	S100A11	Protein S100-A11 OS=Homo sapiens OX=9606 GN=S100A11 PE=1 SV=2	-0.730211	9.18107	-2.71553	0.00948402	0.447969	-2.64628
sp|Q15334|L2GL1_HUMAN	LLGL1	Lethal(2) giant larvae protein homolog 1 OS=Homo sapiens OX=9606 GN=LLGL1 PE=1 SV=3	0.212571	7.74085	2.71279	0.0095509	0.447969	-2.65139
sp|Q8WWT9|S13A3_HUMAN	SLC13A3	Na(+)/dicarboxylate cotransporter 3 OS=Homo sapiens OX=9606 GN=SLC13A3 PE=1 SV=1	-0.651763	6.76146	-2.7176	0.00958408	0.447969	-2.66033
sp|Q9P2X3|IMPCT_HUMAN	IMPACT	Protein IMPACT OS=Homo sapiens OX=9606 GN=IMPACT PE=1 SV=2	-0.360562	7.12215	-2.79793	0.0087525	0.447969	-2.66324
sp|P54920|SNAA_HUMAN	NAPA	Alpha-soluble NSF attachment protein OS=Homo sapiens OX=9606 GN=NAPA PE=1 SV=3	0.278264	8.80572	2.70439	0.00975906	0.447969	-2.66704
sp|P46782|RS5_HUMAN	RPS5	40S ribosomal protein S5 OS=Homo sapiens OX=9606 GN=RPS5 PE=1 SV=4	-0.450842	8.5081	-2.69617	0.00996686	0.447969	-2.68233
sp|Q9UPY6|WASF3_HUMAN	WASF3	Actin-binding protein WASF3 OS=Homo sapiens OX=9606 GN=WASF3 PE=1 SV=2	-0.662924	7.88202	-2.69333	0.0100397	0.447969	-2.68762
sp|P01860|IGHG3_HUMAN	IGHG3	Immunoglobulin heavy constant gamma 3 OS=Homo sapiens OX=9606 GN=IGHG3 PE=1 SV=2	-0.493702	8.62273	-2.68972	0.0101329	0.447969	-2.69432
sp|P62266|RS23_HUMAN	RPS23	40S ribosomal protein S23 OS=Homo sapiens OX=9606 GN=RPS23 PE=1 SV=3	-0.259797	8.54898	-2.68887	0.0101548	0.447969	-2.69588
sp|Q9H2H9|S38A1_HUMAN	SLC38A1	Sodium-coupled neutral amino acid symporter 1 OS=Homo sapiens OX=9606 GN=SLC38A1 PE=1 SV=1	-0.430837	8.73951	-2.69775	0.0100812	0.447969	-2.69614
sp|P47755|CAZA2_HUMAN	CAPZA2	F-actin-capping protein subunit alpha-2 OS=Homo sapiens OX=9606 GN=CAPZA2 PE=1 SV=3	0.260315	7.87836	2.68809	0.010175	0.447969	-2.69733
sp|P49760|CLK2_HUMAN	CLK2	Dual specificity protein kinase CLK2 OS=Homo sapiens OX=9606 GN=CLK2 PE=1 SV=1	0.312152	7.78543	2.68411	0.010279	0.447969	-2.7047
sp|Q8NAT1|PMGT2_HUMAN	POMGNT2	Protein O-linked-mannose beta-1,4-N-acetylglucosaminyltransferase 2 OS=Homo sapiens OX=9606 GN=POMGNT2 PE=1 SV=1	-0.423451	6.97027	-2.68388	0.0102852	0.447969	-2.70514
sp|P20339|RAB5A_HUMAN	RAB5A	Ras-related protein Rab-5A OS=Homo sapiens OX=9606 GN=RAB5A PE=1 SV=2	0.331715	8.60258	2.68369	0.0102903	0.447969	-2.7055
sp|P12277|KCRB_HUMAN	CKB	Creatine kinase B-type OS=Homo sapiens OX=9606 GN=CKB PE=1 SV=1	0.315166	10.6747	2.67841	0.0104298	0.447969	-2.71527
sp|P62140|PP1B_HUMAN	PPP1CB	Serine/threonine-protein phosphatase PP1-beta catalytic subunit OS=Homo sapiens OX=9606 GN=PPP1CB PE=1 SV=3	0.146381	8.25998	2.67759	0.0104517	0.447969	-2.71679
sp|P61513|RL37A_HUMAN	RPL37A	60S ribosomal protein L37a OS=Homo sapiens OX=9606 GN=RPL37A PE=1 SV=2	-0.375436	7.4451	-2.67564	0.0105038	0.447969	-2.72039
sp|P56134|ATPK_HUMAN	ATP5MF	ATP synthase subunit f, mitochondrial OS=Homo sapiens OX=9606 GN=ATP5MF PE=1 SV=3	1.03113	8.44362	2.67516	0.0105165	0.447969	-2.72127
sp|P18621|RL17_HUMAN	RPL17	60S ribosomal protein L17 OS=Homo sapiens OX=9606 GN=RPL17 PE=1 SV=3	-0.209968	7.77705	-2.67342	0.0105634	0.447969	-2.72449
sp|P61247|RS3A_HUMAN	RPS3A	40S ribosomal protein S3a OS=Homo sapiens OX=9606 GN=RPS3A PE=1 SV=2	-0.25872	7.791	-2.67209	0.0105991	0.447969	-2.72694
sp|O00154|BACH_HUMAN	ACOT7	Cytosolic acyl coenzyme A thioester hydrolase OS=Homo sapiens OX=9606 GN=ACOT7 PE=1 SV=3	0.273344	8.51013	2.67167	0.0106107	0.447969	-2.72773
sp|O60271|JIP4_HUMAN	SPAG9	C-Jun-amino-terminal kinase-interacting protein 4 OS=Homo sapiens OX=9606 GN=SPAG9 PE=1 SV=4	-0.266648	6.82569	-2.65804	0.0109849	0.447969	-2.75285
sp|Q9UIA9|XPO7_HUMAN	XPO7	Exportin-7 OS=Homo sapiens OX=9606 GN=XPO7 PE=1 SV=3	-0.20277	7.27736	-2.65782	0.0109911	0.447969	-2.75326
sp|P35754|GLRX1_HUMAN	GLRX	Glutaredoxin-1 OS=Homo sapiens OX=9606 GN=GLRX PE=1 SV=2	0.601835	6.55922	2.66494	0.0109557	0.447969	-2.75579
sp|Q02246|CNTN2_HUMAN	CNTN2	Contactin-2 OS=Homo sapiens OX=9606 GN=CNTN2 PE=1 SV=1	0.330317	7.54199	2.65632	0.011033	0.447969	-2.75602
sp|Q9Y426|C2CD2_HUMAN	C2CD2	C2 domain-containing protein 2 OS=Homo sapiens OX=9606 GN=C2CD2 PE=1 SV=2	0.439035	6.67298	2.64971	0.01122	0.447969	-2.76819
sp|P98160|PGBM_HUMAN	HSPG2	Basement membrane-specific heparan sulfate proteoglycan core protein OS=Homo sapiens OX=9606 GN=HSPG2 PE=1 SV=4	-0.251951	7.28737	-2.64557	0.0113382	0.447969	-2.77578
sp|P61225|RAP2B_HUMAN	RAP2B	Ras-related protein Rap-2b OS=Homo sapiens OX=9606 GN=RAP2B PE=1 SV=1	-0.442043	7.98802	-2.64203	0.0114405	0.447969	-2.78228
sp|Q5SYC1|CLVS2_HUMAN	CLVS2	Clavesin-2 OS=Homo sapiens OX=9606 GN=CLVS2 PE=1 SV=1	0.396948	7.61599	2.6393	0.0115198	0.447969	-2.78728
sp|O43837|IDH3B_HUMAN	IDH3B	Isocitrate dehydrogenase [NAD] subunit beta, mitochondrial OS=Homo sapiens OX=9606 GN=IDH3B PE=1 SV=2	0.248207	8.18122	2.62014	0.0120911	0.447969	-2.8223
sp|Q7LBR1|CHM1B_HUMAN	CHMP1B	Charged multivesicular body protein 1b OS=Homo sapiens OX=9606 GN=CHMP1B PE=1 SV=1	-0.298502	7.94166	-2.61816	0.0121515	0.447969	-2.82591
sp|P62841|RS15_HUMAN	RPS15	40S ribosomal protein S15 OS=Homo sapiens OX=9606 GN=RPS15 PE=1 SV=2	-0.338895	7.11379	-2.61739	0.0121752	0.447969	-2.82732
sp|Q9HA72|CAHM2_HUMAN	CALHM2	Calcium homeostasis modulator protein 2 OS=Homo sapiens OX=9606 GN=CALHM2 PE=1 SV=1	-0.343892	6.84027	-2.64594	0.0119937	0.447969	-2.83824
sp|P10619|PPGB_HUMAN	CTSA	Lysosomal protective protein OS=Homo sapiens OX=9606 GN=CTSA PE=1 SV=2	0.492179	7.61473	2.71032	0.0111575	0.447969	-2.8498
sp|P39687|AN32A_HUMAN	ANP32A	Acidic leucine-rich nuclear phosphoprotein 32 family member A OS=Homo sapiens OX=9606 GN=ANP32A PE=1 SV=1	-0.394273	7.94303	-2.60348	0.0126089	0.447969	-2.85262
sp|Q6PL24|TMED8_HUMAN	TMED8	Protein TMED8 OS=Homo sapiens OX=9606 GN=TMED8 PE=1 SV=1	-0.382581	7.19399	-2.6379	0.0123536	0.447969	-2.86418
sp|P63218|GBG5_HUMAN	GNG5	Guanine nucleotide-binding protein G(I)/G(S)/G(O) subunit gamma-5 OS=Homo sapiens OX=9606 GN=GNG5 PE=1 SV=3	-0.494649	9.99085	-2.59654	0.0128303	0.447969	-2.8652
sp|Q9H9A6|LRC40_HUMAN	LRRC40	Leucine-rich repeat-containing protein 40 OS=Homo sapiens OX=9606 GN=LRRC40 PE=1 SV=1	0.353149	6.77823	2.60325	0.0127912	0.447969	-2.86699
sp|P07741|APT_HUMAN	APRT	Adenine phosphoribosyltransferase OS=Homo sapiens OX=9606 GN=APRT PE=1 SV=2	-0.628226	7.82774	-2.60238	0.012819	0.447969	-2.86818
sp|P03886|NU1M_HUMAN	MT-ND1	NADH-ubiquinone oxidoreductase chain 1 OS=Homo sapiens OX=9606 GN=MT-ND1 PE=1 SV=1	-0.605414	7.27279	-2.72674	0.0110835	0.447969	-2.87245
sp|Q9BRX8|PXL2A_HUMAN	PRXL2A	Peroxiredoxin-like 2A OS=Homo sapiens OX=9606 GN=PRXL2A PE=1 SV=3	-0.271451	7.51872	-2.59049	0.0130264	0.447969	-2.87616
sp|O43493|TGON2_HUMAN	TGOLN2	Trans-Golgi network integral membrane protein 2 OS=Homo sapiens OX=9606 GN=TGOLN2 PE=1 SV=4	-0.474004	6.67336	-2.58151	0.0133228	0.451194	-2.8924
sp|P02462|CO4A1_HUMAN	COL4A1	Collagen alpha-1(IV) chain OS=Homo sapiens OX=9606 GN=COL4A1 PE=1 SV=4	-0.347402	7.9175	-2.58634	0.0133417	0.451194	-2.89707
sp|Q8TEV9|SMCR8_HUMAN	SMCR8	Guanine nucleotide exchange protein SMCR8 OS=Homo sapiens OX=9606 GN=SMCR8 PE=1 SV=2	-0.395032	6.81727	-2.6617	0.0123578	0.447969	-2.89878
sp|Q9H082|RB33B_HUMAN	RAB33B	Ras-related protein Rab-33B OS=Homo sapiens OX=9606 GN=RAB33B PE=1 SV=1	-0.365135	6.96594	-2.6207	0.0130144	0.447969	-2.90449
sp|O00142|KITM_HUMAN	TK2	Thymidine kinase 2, mitochondrial OS=Homo sapiens OX=9606 GN=TK2 PE=1 SV=4	0.338508	7.36935	2.57307	0.0136952	0.451198	-2.91376
sp|P20645|MPRD_HUMAN	M6PR	Cation-dependent mannose-6-phosphate receptor OS=Homo sapiens OX=9606 GN=M6PR PE=1 SV=1	-0.472827	8.47232	-2.56617	0.0139323	0.452467	-2.92608
sp|Q4V9L6|TM119_HUMAN	TMEM119	Transmembrane protein 119 OS=Homo sapiens OX=9606 GN=TMEM119 PE=1 SV=1	-0.373675	8.04293	-2.58793	0.0137076	0.451198	-2.92718
sp|P49406|RM19_HUMAN	MRPL19	39S ribosomal protein L19, mitochondrial OS=Homo sapiens OX=9606 GN=MRPL19 PE=1 SV=2	0.390757	7.05444	2.65573	0.0127094	0.447969	-2.94282
sp|Q765P7|MTSS2_HUMAN	MTSS2	Protein MTSS 2 OS=Homo sapiens OX=9606 GN=MTSS2 PE=1 SV=1	-0.409577	7.93361	-2.55178	0.0143475	0.460831	-2.94586
sp|P49207|RL34_HUMAN	RPL34	60S ribosomal protein L34 OS=Homo sapiens OX=9606 GN=RPL34 PE=1 SV=3	-0.453331	7.38248	-2.55411	0.014451	0.460831	-2.95402
sp|Q9Y484|WIPI4_HUMAN	WDR45	WD repeat domain phosphoinositide-interacting protein 4 OS=Homo sapiens OX=9606 GN=WDR45 PE=1 SV=1	0.302552	6.78994	2.54831	0.0145633	0.460831	-2.95784
sp|P30050|RL12_HUMAN	RPL12	60S ribosomal protein L12 OS=Homo sapiens OX=9606 GN=RPL12 PE=1 SV=1	-0.244435	7.85874	-2.5364	0.0149054	0.460831	-2.97335
sp|P03891|NU2M_HUMAN	MT-ND2	NADH-ubiquinone oxidoreductase chain 2 OS=Homo sapiens OX=9606 GN=MT-ND2 PE=1 SV=2	0.741525	7.03832	2.55831	0.0147358	0.460831	-2.97689
sp|Q96AJ9|VTI1A_HUMAN	VTI1A	Vesicle transport through interaction with t-SNAREs homolog 1A OS=Homo sapiens OX=9606 GN=VTI1A PE=1 SV=2	-0.452997	6.83984	-2.54963	0.0149316	0.460831	-2.98331
tr|A0A1B0GTW6|A0A1B0GTW6_HUMAN	EPB41L1	Erythrocyte membrane protein band 4.1 like 1 OS=Homo sapiens OX=9606 GN=EPB41L1 PE=1 SV=2	0.473246	6.01966	2.54527	0.0149781	0.460831	-2.98335
sp|P55160|NCKPL_HUMAN	NCKAP1L	Nck-associated protein 1-like OS=Homo sapiens OX=9606 GN=NCKAP1L PE=1 SV=3	-0.243992	6.81684	-2.52783	0.0152247	0.464742	-2.98861
tr|A0A8I5KQ21|A0A8I5KQ21_HUMAN	KRAS	KRAS proto-oncogene, GTPase OS=Homo sapiens OX=9606 GN=KRAS PE=1 SV=1	0.598024	8.82271	2.52498	0.0153324	0.464742	-2.99369
sp|P36873|PP1G_HUMAN	PPP1CC	Serine/threonine-protein phosphatase PP1-gamma catalytic subunit OS=Homo sapiens OX=9606 GN=PPP1CC PE=1 SV=1	0.176236	7.92951	2.52152	0.0154642	0.46529	-2.99985
sp|P81605|DCD_HUMAN	DCD	Dermcidin OS=Homo sapiens OX=9606 GN=DCD PE=1 SV=2	-1.19608	8.70326	-2.64214	0.013745	0.451198	-3.01549
sp|Q969L2|MAL2_HUMAN	MAL2	Protein MAL2 OS=Homo sapiens OX=9606 GN=MAL2 PE=1 SV=1	0.490955	11.1243	2.50696	0.016029	0.472403	-3.02565
sp|P02743|SAMP_HUMAN	APCS	Serum amyloid P-component OS=Homo sapiens OX=9606 GN=APCS PE=1 SV=2	-0.59387	7.95167	-2.51269	0.0160003	0.472403	-3.02651
sp|Q10471|GALT2_HUMAN	GALNT2	Polypeptide N-acetylgalactosaminyltransferase 2 OS=Homo sapiens OX=9606 GN=GALNT2 PE=1 SV=1	-0.330293	7.59021	-2.51703	0.0160469	0.472403	-3.03144
sp|P20648|ATP4A_HUMAN	ATP4A	Potassium-transporting ATPase alpha chain 1 OS=Homo sapiens OX=9606 GN=ATP4A PE=1 SV=5	0.448055	11.0253	2.50118	0.0162585	0.475212	-3.03588
sp|O60262|GBG7_HUMAN	GNG7	Guanine nucleotide-binding protein G(I)/G(S)/G(O) subunit gamma-7 OS=Homo sapiens OX=9606 GN=GNG7 PE=1 SV=1	0.257903	10.9387	2.49689	0.0164305	0.476834	-3.04344
sp|Q9H0A8|COMD4_HUMAN	COMMD4	COMM domain-containing protein 4 OS=Homo sapiens OX=9606 GN=COMMD4 PE=1 SV=1	0.616863	5.89808	2.65681	0.0137829	0.451198	-3.04816
sp|Q96GW7|PGCB_HUMAN	BCAN	Brevican core protein OS=Homo sapiens OX=9606 GN=BCAN PE=1 SV=2	0.278254	8.1376	2.49118	0.0166626	0.480164	-3.05352
tr|A0A669KB77|A0A669KB77_HUMAN	MAP2	Microtubule-associated protein OS=Homo sapiens OX=9606 GN=MAP2 PE=1 SV=1	0.486791	6.2708	2.68149	0.0130274	0.447969	-3.05405
sp|Q12931|TRAP1_HUMAN	TRAP1	Heat shock protein 75 kDa, mitochondrial OS=Homo sapiens OX=9606 GN=TRAP1 PE=1 SV=3	0.292421	8.46643	2.4865	0.0168546	0.480686	-3.06175
sp|P46783|RS10_HUMAN	RPS10	40S ribosomal protein S10 OS=Homo sapiens OX=9606 GN=RPS10 PE=1 SV=1	-0.381593	7.84237	-2.47947	0.0171471	0.480686	-3.07411
sp|Q9NUJ1|ABHDA_HUMAN	ABHD10	Palmitoyl-protein thioesterase ABHD10, mitochondrial OS=Homo sapiens OX=9606 GN=ABHD10 PE=1 SV=1	0.335143	6.99035	2.47703	0.0172495	0.480686	-3.07839
tr|A2AAZ0|A2AAZ0_HUMAN	HLA-DQB1	Major histocompatibility complex, class II, DQ beta 1 OS=Homo sapiens OX=9606 GN=HLA-DQB1 PE=1 SV=1	0.682846	7.10547	2.72331	0.012387	0.447969	-3.08207
sp|Q99442|SEC62_HUMAN	SEC62	Translocation protein SEC62 OS=Homo sapiens OX=9606 GN=SEC62 PE=1 SV=1	-0.248453	7.5381	-2.47231	0.0174497	0.480686	-3.08667
sp|P33151|CADH5_HUMAN	CDH5	Cadherin-5 OS=Homo sapiens OX=9606 GN=CDH5 PE=1 SV=5	-0.344863	6.95819	-2.49726	0.0172155	0.480686	-3.0875
sp|Q13501|SQSTM_HUMAN	SQSTM1	Sequestosome-1 OS=Homo sapiens OX=9606 GN=SQSTM1 PE=1 SV=1	-0.470295	6.35506	-2.46914	0.0175851	0.480686	-3.09222
sp|Q9BV35|SCMC3_HUMAN	SLC25A23	Calcium-binding mitochondrial carrier protein SCaMC-3 OS=Homo sapiens OX=9606 GN=SLC25A23 PE=1 SV=2	-0.373369	7.25589	-2.47193	0.0176714	0.480686	-3.09686
sp|P62899|RL31_HUMAN	RPL31	60S ribosomal protein L31 OS=Homo sapiens OX=9606 GN=RPL31 PE=1 SV=1	-0.298118	8.34362	-2.46364	0.0178229	0.480686	-3.10186
sp|Q96MP8|KCTD7_HUMAN	KCTD7	BTB/POZ domain-containing protein KCTD7 OS=Homo sapiens OX=9606 GN=KCTD7 PE=1 SV=1	-0.38868	6.62768	-2.47939	0.0177015	0.480686	-3.1021
sp|Q96A65|EXOC4_HUMAN	EXOC4	Exocyst complex component 4 OS=Homo sapiens OX=9606 GN=EXOC4 PE=1 SV=1	-0.174646	6.97318	-2.46014	0.0179752	0.480686	-3.10796
sp|Q16643|DREB_HUMAN	DBN1	Drebrin OS=Homo sapiens OX=9606 GN=DBN1 PE=1 SV=4	0.37051	6.83611	2.45704	0.0181116	0.480686	-3.11338
sp|Q9H3Q1|BORG4_HUMAN	CDC42EP4	Cdc42 effector protein 4 OS=Homo sapiens OX=9606 GN=CDC42EP4 PE=1 SV=1	-0.399147	6.56432	-2.47283	0.0179829	0.480686	-3.1138
sp|P49257|LMAN1_HUMAN	LMAN1	Protein ERGIC-53 OS=Homo sapiens OX=9606 GN=LMAN1 PE=1 SV=2	-0.248587	7.5233	-2.45386	0.0182521	0.480686	-3.11893
sp|A5YM72|CRNS1_HUMAN	CARNS1	Carnosine synthase 1 OS=Homo sapiens OX=9606 GN=CARNS1 PE=1 SV=3	0.482766	7.36974	2.45132	0.0183651	0.480686	-3.12335
sp|Q13409|DC1I2_HUMAN	DYNC1I2	Cytoplasmic dynein 1 intermediate chain 2 OS=Homo sapiens OX=9606 GN=DYNC1I2 PE=1 SV=3	-0.223538	7.3797	-2.44771	0.0185268	0.480686	-3.12964
sp|Q9NP81|SYSM_HUMAN	SARS2	Serine--tRNA ligase, mitochondrial OS=Homo sapiens OX=9606 GN=SARS2 PE=1 SV=1	0.394453	6.25235	2.44299	0.0187402	0.480686	-3.13784
sp|Q9UHV9|PFD2_HUMAN	PFDN2	Prefoldin subunit 2 OS=Homo sapiens OX=9606 GN=PFDN2 PE=1 SV=1	0.372623	7.70751	2.44249	0.0187631	0.480686	-3.13872
sp|Q4U2R8|S22A6_HUMAN	SLC22A6	Solute carrier family 22 member 6 OS=Homo sapiens OX=9606 GN=SLC22A6 PE=1 SV=1	-0.433664	7.55461	-2.45077	0.0188327	0.480686	-3.14491
sp|P26373|RL13_HUMAN	RPL13	60S ribosomal protein L13 OS=Homo sapiens OX=9606 GN=RPL13 PE=1 SV=4	-0.203294	8.03119	-2.43206	0.0192432	0.480686	-3.15682
sp|O95674|CDS2_HUMAN	CDS2	Phosphatidate cytidylyltransferase 2 OS=Homo sapiens OX=9606 GN=CDS2 PE=1 SV=1	-0.395355	7.57112	-2.42961	0.0193572	0.480686	-3.16105
sp|P12532|KCRU_HUMAN	CKMT1A	Creatine kinase U-type, mitochondrial OS=Homo sapiens OX=9606 GN=CKMT1A PE=1 SV=1	0.344014	8.09041	2.42931	0.0193716	0.480686	-3.16158
sp|P23284|PPIB_HUMAN	PPIB	Peptidyl-prolyl cis-trans isomerase B OS=Homo sapiens OX=9606 GN=PPIB PE=1 SV=2	0.415219	7.81954	2.42532	0.019559	0.480686	-3.16847
sp|P07099|HYEP_HUMAN	EPHX1	Epoxide hydrolase 1 OS=Homo sapiens OX=9606 GN=EPHX1 PE=1 SV=1	-0.315156	8.83326	-2.4225	0.0196927	0.480686	-3.17335
sp|Q86TV6|TTC7B_HUMAN	TTC7B	Tetratricopeptide repeat protein 7B OS=Homo sapiens OX=9606 GN=TTC7B PE=1 SV=3	0.234002	7.45444	2.4209	0.019769	0.480686	-3.17612
sp|Q9UQ13|SHOC2_HUMAN	SHOC2	Leucine-rich repeat protein SHOC-2 OS=Homo sapiens OX=9606 GN=SHOC2 PE=1 SV=2	0.371228	6.30139	2.42859	0.0197371	0.480686	-3.17625
sp|P61601|NCALD_HUMAN	NCALD	Neurocalcin-delta OS=Homo sapiens OX=9606 GN=NCALD PE=1 SV=2	0.341244	7.98016	2.41915	0.0198524	0.480686	-3.17913
sp|P05387|RLA2_HUMAN	RPLP2	60S acidic ribosomal protein P2 OS=Homo sapiens OX=9606 GN=RPLP2 PE=1 SV=1	0.319489	8.75703	2.41365	0.0201173	0.482874	-3.18861
sp|Q12955|ANK3_HUMAN	ANK3	Ankyrin-3 OS=Homo sapiens OX=9606 GN=ANK3 PE=1 SV=3	0.273533	7.22546	2.41107	0.0202426	0.482874	-3.19305
sp|Q9H2W6|RM46_HUMAN	MRPL46	39S ribosomal protein L46, mitochondrial OS=Homo sapiens OX=9606 GN=MRPL46 PE=1 SV=1	0.293125	6.53943	2.42215	0.0202967	0.482874	-3.1973
sp|Q92859|NEO1_HUMAN	NEO1	Neogenin OS=Homo sapiens OX=9606 GN=NEO1 PE=1 SV=2	0.308402	6.22864	2.40296	0.0206414	0.483297	-3.207
sp|Q92621|NU205_HUMAN	NUP205	Nuclear pore complex protein Nup205 OS=Homo sapiens OX=9606 GN=NUP205 PE=1 SV=3	-0.236013	6.51751	-2.4024	0.0206693	0.483297	-3.20797
sp|Q13418|ILK_HUMAN	ILK	Integrin-linked protein kinase OS=Homo sapiens OX=9606 GN=ILK PE=1 SV=2	-0.19711	7.25228	-2.40046	0.0207661	0.483297	-3.21131
sp|P25942|TNR5_HUMAN	CD40	Tumor necrosis factor receptor superfamily member 5 OS=Homo sapiens OX=9606 GN=CD40 PE=1 SV=1	-0.408689	7.55485	-2.41789	0.020787	0.483297	-3.21685
sp|Q99614|TTC1_HUMAN	TTC1	Tetratricopeptide repeat protein 1 OS=Homo sapiens OX=9606 GN=TTC1 PE=1 SV=1	-0.383613	6.83052	-2.39653	0.0211861	0.489794	-3.22537
sp|P22732|GTR5_HUMAN	SLC2A5	Solute carrier family 2, facilitated glucose transporter member 5 OS=Homo sapiens OX=9606 GN=SLC2A5 PE=1 SV=1	-0.323152	7.73291	-2.38321	0.0216425	0.496316	-3.24084
sp|O15173|PGRC2_HUMAN	PGRMC2	Membrane-associated progesterone receptor component 2 OS=Homo sapiens OX=9606 GN=PGRMC2 PE=1 SV=1	-0.414136	7.76534	-2.3808	0.0217674	0.496316	-3.24494
sp|P62495|ERF1_HUMAN	ETF1	Eukaryotic peptide chain release factor subunit 1 OS=Homo sapiens OX=9606 GN=ETF1 PE=1 SV=3	0.168367	7.00824	2.37594	0.0220215	0.496316	-3.25323
sp|Q9GZM7|TINAL_HUMAN	TINAGL1	Tubulointerstitial nephritis antigen-like OS=Homo sapiens OX=9606 GN=TINAGL1 PE=1 SV=1	-0.356974	7.28232	-2.37263	0.022196	0.496316	-3.25886
sp|A0A075B6K4|LV310_HUMAN	IGLV3-10	Immunoglobulin lambda variable 3-10 OS=Homo sapiens OX=9606 GN=IGLV3-10 PE=3 SV=2	-0.490201	8.41731	-2.51758	0.0192053	0.480686	-3.26519
sp|Q8IYB4|PEX5R_HUMAN	PEX5L	PEX5-related protein OS=Homo sapiens OX=9606 GN=PEX5L PE=1 SV=2	0.28606	7.16659	2.36585	0.0226703	0.498157	-3.27347
sp|P26885|FKBP2_HUMAN	FKBP2	Peptidyl-prolyl cis-trans isomerase FKBP2 OS=Homo sapiens OX=9606 GN=FKBP2 PE=1 SV=2	0.548256	7.47645	2.36129	0.0228038	0.498157	-3.27813
sp|Q9ULP0|NDRG4_HUMAN	NDRG4	Protein NDRG4 OS=Homo sapiens OX=9606 GN=NDRG4 PE=1 SV=2	0.224671	8.21263	2.35959	0.0228963	0.498157	-3.28101
sp|P07093|GDN_HUMAN	SERPINE2	Glia-derived nexin OS=Homo sapiens OX=9606 GN=SERPINE2 PE=1 SV=1	-0.297512	6.97583	-2.3563	0.0230765	0.498157	-3.2866
sp|Q9Y584|TIM22_HUMAN	TIMM22	Mitochondrial import inner membrane translocase subunit Tim22 OS=Homo sapiens OX=9606 GN=TIMM22 PE=1 SV=2	0.704202	8.19151	2.35457	0.0231713	0.498157	-3.28952
sp|P51398|RT29_HUMAN	DAP3	28S ribosomal protein S29, mitochondrial OS=Homo sapiens OX=9606 GN=DAP3 PE=1 SV=1	0.462241	6.42396	2.38035	0.0232126	0.498157	-3.29811
sp|Q9Y2T2|AP3M1_HUMAN	AP3M1	AP-3 complex subunit mu-1 OS=Homo sapiens OX=9606 GN=AP3M1 PE=1 SV=1	-0.305401	6.76792	-2.34799	0.0235359	0.498157	-3.30064
sp|Q9NUQ9|CYRIB_HUMAN	CYRIB	CYFIP-related Rac1 interactor B OS=Homo sapiens OX=9606 GN=CYRIB PE=1 SV=1	0.243928	7.31998	2.3475	0.0235636	0.498157	-3.30148
sp|Q07075|AMPE_HUMAN	ENPEP	Glutamyl aminopeptidase OS=Homo sapiens OX=9606 GN=ENPEP PE=1 SV=3	-0.411604	6.61992	-2.35464	0.0236584	0.498157	-3.30316
sp|P22612|KAPCG_HUMAN	PRKACG	cAMP-dependent protein kinase catalytic subunit gamma OS=Homo sapiens OX=9606 GN=PRKACG PE=1 SV=3	0.484213	7.63626	2.35268	0.0237676	0.498157	-3.30653
sp|P08174|DAF_HUMAN	CD55	Complement decay-accelerating factor OS=Homo sapiens OX=9606 GN=CD55 PE=1 SV=4	-0.305399	7.84195	-2.34364	0.02378	0.498157	-3.30799
sp|Q15052|ARHG6_HUMAN	ARHGEF6	Rho guanine nucleotide exchange factor 6 OS=Homo sapiens OX=9606 GN=ARHGEF6 PE=1 SV=2	-0.368316	7.06464	-2.34424	0.0238609	0.498157	-3.30975
sp|P61086|UBE2K_HUMAN	UBE2K	Ubiquitin-conjugating enzyme E2 K OS=Homo sapiens OX=9606 GN=UBE2K PE=1 SV=3	0.28048	7.62502	2.33895	0.0240455	0.499297	-3.3159
sp|P46977|STT3A_HUMAN	STT3A	Dolichyl-diphosphooligosaccharide--protein glycosyltransferase subunit STT3A OS=Homo sapiens OX=9606 GN=STT3A PE=1 SV=2	-0.335834	7.71336	-2.33695	0.0241595	0.499297	-3.31927
sp|O14498|ISLR_HUMAN	ISLR	Immunoglobulin superfamily containing leucine-rich repeat protein OS=Homo sapiens OX=9606 GN=ISLR PE=2 SV=1	0.317361	6.48119	2.42939	0.0220334	0.496316	-3.32116
sp|Q5ZPR3|CD276_HUMAN	CD276	CD276 antigen OS=Homo sapiens OX=9606 GN=CD276 PE=1 SV=1	-0.324075	7.37137	-2.33418	0.0244341	0.500803	-3.32656
sp|P02689|MYP2_HUMAN	PMP2	Myelin P2 protein OS=Homo sapiens OX=9606 GN=PMP2 PE=1 SV=3	0.509742	7.71015	2.33063	0.0245229	0.500803	-3.32989
sp|O43819|SCO2_HUMAN	SCO2	Protein SCO2 homolog, mitochondrial OS=Homo sapiens OX=9606 GN=SCO2 PE=1 SV=3	0.362041	7.33185	2.44496	0.0221772	0.496316	-3.33008
sp|P61204|ARF3_HUMAN	ARF3	ADP-ribosylation factor 3 OS=Homo sapiens OX=9606 GN=ARF3 PE=1 SV=2	0.242535	10.6062	2.32931	0.0245996	0.500803	-3.33211
tr|H0Y972|H0Y972_HUMAN	GRIA2	Glutamate ionotropic receptor AMPA type subunit 2 (Fragment) OS=Homo sapiens OX=9606 GN=GRIA2 PE=1 SV=1	-0.457293	7.30198	-2.39818	0.0236331	0.498157	-3.33692
sp|Q96HD1|CREL1_HUMAN	CRELD1	Protein disulfide isomerase CRELD1 OS=Homo sapiens OX=9606 GN=CRELD1 PE=1 SV=3	-0.359337	6.38749	-2.32584	0.024802	0.50121	-3.33794
sp|Q9NYU2|UGGG1_HUMAN	UGGT1	UDP-glucose:glycoprotein glucosyltransferase 1 OS=Homo sapiens OX=9606 GN=UGGT1 PE=1 SV=3	0.215649	7.24018	2.32269	0.024987	0.50121	-3.34322
sp|P14923|PLAK_HUMAN	JUP	Junction plakoglobin OS=Homo sapiens OX=9606 GN=JUP PE=1 SV=3	-0.345431	6.66273	-2.33475	0.0252378	0.501856	-3.3494
sp|Q9UM00|TMCO1_HUMAN	TMCO1	Calcium load-activated calcium channel OS=Homo sapiens OX=9606 GN=TMCO1 PE=1 SV=2	-0.265674	8.40103	-2.31998	0.0252645	0.501856	-3.3502
sp|P01714|LV319_HUMAN	IGLV3-19	Immunoglobulin lambda variable 3-19 OS=Homo sapiens OX=9606 GN=IGLV3-19 PE=1 SV=2	-0.595373	7.14108	-2.36553	0.0248859	0.50121	-3.35809
sp|P78536|ADA17_HUMAN	ADAM17	Disintegrin and metalloproteinase domain-containing protein 17 OS=Homo sapiens OX=9606 GN=ADAM17 PE=1 SV=1	-0.370487	7.17457	-2.31576	0.0256406	0.506866	-3.35991
sp|Q92752|TENR_HUMAN	TNR	Tenascin-R OS=Homo sapiens OX=9606 GN=TNR PE=1 SV=3	0.263556	8.68688	2.30648	0.0259578	0.510669	-3.37031
sp|Q6GQQ9|OTU7B_HUMAN	OTUD7B	OTU domain-containing protein 7B OS=Homo sapiens OX=9606 GN=OTUD7B PE=1 SV=1	0.293528	7.12645	2.308	0.0265259	0.51653	-3.38264
sp|P62072|TIM10_HUMAN	TIMM10	Mitochondrial import inner membrane translocase subunit Tim10 OS=Homo sapiens OX=9606 GN=TIMM10 PE=1 SV=1	-0.304678	8.23355	-2.29633	0.0267034	0.51653	-3.38934
sp|O76003|GLRX3_HUMAN	GLRX3	Glutaredoxin-3 OS=Homo sapiens OX=9606 GN=GLRX3 PE=1 SV=2	0.235027	7.73684	2.29349	0.0267606	0.51653	-3.39193
sp|Q15526|SURF1_HUMAN	SURF1	Surfeit locus protein 1 OS=Homo sapiens OX=9606 GN=SURF1 PE=1 SV=1	-0.399767	7.38003	-2.28969	0.0273819	0.524399	-3.40532
sp|Q9BQB6|VKOR1_HUMAN	VKORC1	Vitamin K epoxide reductase complex subunit 1 OS=Homo sapiens OX=9606 GN=VKORC1 PE=1 SV=1	0.488677	8.10797	2.28581	0.0274946	0.524399	-3.40898
sp|Q8TEA7|TBCK_HUMAN	TBCK	TBC domain-containing protein kinase-like protein OS=Homo sapiens OX=9606 GN=TBCK PE=1 SV=4	-0.39805	6.4664	-2.36441	0.0261077	0.511162	-3.41303
sp|P39019|RS19_HUMAN	RPS19	40S ribosomal protein S19 OS=Homo sapiens OX=9606 GN=RPS19 PE=1 SV=2	-0.364376	9.17485	-2.27982	0.0276286	0.524399	-3.41457
sp|O75351|VPS4B_HUMAN	VPS4B	Vacuolar protein sorting-associated protein 4B OS=Homo sapiens OX=9606 GN=VPS4B PE=1 SV=2	0.253768	7.45381	2.27901	0.0276809	0.524399	-3.41591
sp|P53708|ITA8_HUMAN	ITGA8	Integrin alpha-8 OS=Homo sapiens OX=9606 GN=ITGA8 PE=1 SV=3	-0.286636	7.20944	-2.28662	0.0278672	0.524733	-3.41665
sp|Q8NFW9|MYRIP_HUMAN	MYRIP	Rab effector MyRIP OS=Homo sapiens OX=9606 GN=MYRIP PE=1 SV=2	-0.311729	7.16653	-2.29274	0.0281591	0.524733	-3.4254
sp|Q9UKR5|ERG28_HUMAN	ERG28	Ergosterol biosynthetic protein 28 homolog OS=Homo sapiens OX=9606 GN=ERG28 PE=1 SV=1	-0.401065	7.26908	-2.28903	0.0282115	0.524733	-3.42593
sp|Q7Z2W4|ZCCHV_HUMAN	ZC3HAV1	Zinc finger CCCH-type antiviral protein 1 OS=Homo sapiens OX=9606 GN=ZC3HAV1 PE=1 SV=3	0.219987	6.83501	2.27139	0.0281768	0.524733	-3.42849
sp|Q8NFX7|STXB6_HUMAN	STXBP6	Syntaxin-binding protein 6 OS=Homo sapiens OX=9606 GN=STXBP6 PE=1 SV=2	-0.25359	6.9825	-2.26734	0.0284433	0.525052	-3.43516
sp|Q9NZ32|ARP10_HUMAN	ACTR10	Actin-related protein 10 OS=Homo sapiens OX=9606 GN=ACTR10 PE=1 SV=1	0.207809	7.15001	2.26671	0.0284852	0.525052	-3.43621
sp|P49758|RGS6_HUMAN	RGS6	Regulator of G-protein signaling 6 OS=Homo sapiens OX=9606 GN=RGS6 PE=1 SV=5	0.180617	7.36368	2.26256	0.0287613	0.527176	-3.44303
sp|Q16537|2A5E_HUMAN	PPP2R5E	Serine/threonine-protein phosphatase 2A 56 kDa regulatory subunit epsilon isoform OS=Homo sapiens OX=9606 GN=PPP2R5E PE=1 SV=1	0.204156	7.44749	2.26057	0.0288944	0.527176	-3.4463
sp|P61966|AP1S1_HUMAN	AP1S1	AP-1 complex subunit sigma-1A OS=Homo sapiens OX=9606 GN=AP1S1 PE=1 SV=1	-0.452318	6.87811	-2.27561	0.0290864	0.527176	-3.4465
sp|Q14738|2A5D_HUMAN	PPP2R5D	Serine/threonine-protein phosphatase 2A 56 kDa regulatory subunit delta isoform OS=Homo sapiens OX=9606 GN=PPP2R5D PE=1 SV=1	0.24953	7.05335	2.2567	0.029155	0.527176	-3.45266
sp|P01871|IGHM_HUMAN	IGHM	Immunoglobulin heavy constant mu OS=Homo sapiens OX=9606 GN=IGHM PE=1 SV=4	-0.859486	8.32192	-2.25485	0.0292801	0.527176	-3.45569
sp|P05026|AT1B1_HUMAN	ATP1B1	Sodium/potassium-transporting ATPase subunit beta-1 OS=Homo sapiens OX=9606 GN=ATP1B1 PE=1 SV=1	0.197965	11.2937	2.25348	0.0293734	0.527176	-3.45794
sp|Q9UBG0|MRC2_HUMAN	MRC2	C-type mannose receptor 2 OS=Homo sapiens OX=9606 GN=MRC2 PE=1 SV=2	-0.40588	6.79817	-2.24878	0.0296946	0.530613	-3.46563
sp|Q96BY6|DOC10_HUMAN	DOCK10	Dedicator of cytokinesis protein 10 OS=Homo sapiens OX=9606 GN=DOCK10 PE=1 SV=3	0.242466	6.58634	2.24375	0.0301682	0.534408	-3.47529
sp|P80748|LV321_HUMAN	IGLV3-21	Immunoglobulin lambda variable 3-21 OS=Homo sapiens OX=9606 GN=IGLV3-21 PE=1 SV=2	-0.563397	6.98108	-2.24548	0.0304668	0.537371	-3.47876
sp|Q9P2E7|PCD10_HUMAN	PCDH10	Protocadherin-10 OS=Homo sapiens OX=9606 GN=PCDH10 PE=1 SV=2	-0.42931	7.2151	-2.27593	0.0301359	0.534408	-3.48146
sp|Q9NUN5|LMBD1_HUMAN	LMBRD1	Lysosomal cobalamin transport escort protein LMBD1 OS=Homo sapiens OX=9606 GN=LMBRD1 PE=1 SV=1	-0.425706	6.81113	-2.25106	0.03075	0.540039	-3.48392
sp|Q8NI60|COQ8A_HUMAN	COQ8A	Atypical kinase COQ8A, mitochondrial OS=Homo sapiens OX=9606 GN=COQ8A PE=1 SV=1	0.356085	7.2674	2.22833	0.0312577	0.540259	-3.50023
sp|Q8TD55|PKHO2_HUMAN	PLEKHO2	Pleckstrin homology domain-containing family O member 2 OS=Homo sapiens OX=9606 GN=PLEKHO2 PE=1 SV=1	-0.261577	7.50049	-2.22452	0.0315324	0.540259	-3.50637
sp|Q9Y3U8|RL36_HUMAN	RPL36	60S ribosomal protein L36 OS=Homo sapiens OX=9606 GN=RPL36 PE=1 SV=3	-0.191145	7.65741	-2.22261	0.0315417	0.540259	-3.50826
sp|Q13885|TBB2A_HUMAN	TUBB2A	Tubulin beta-2A chain OS=Homo sapiens OX=9606 GN=TUBB2A PE=1 SV=1	0.339938	11.2711	2.22243	0.0315547	0.540259	-3.50855
sp|Q96NT5|PCFT_HUMAN	SLC46A1	Proton-coupled folate transporter OS=Homo sapiens OX=9606 GN=SLC46A1 PE=1 SV=1	0.278074	7.03305	2.22216	0.0319809	0.543011	-3.51336
sp|Q92734|TFG_HUMAN	TFG	Protein TFG OS=Homo sapiens OX=9606 GN=TFG PE=1 SV=2	-0.373634	7.85184	-2.21969	0.0318836	0.543011	-3.51415
sp|Q9NXG2|THUM1_HUMAN	THUMPD1	THUMP domain-containing protein 1 OS=Homo sapiens OX=9606 GN=THUMPD1 PE=1 SV=2	0.504892	5.49738	2.27118	0.0312989	0.540259	-3.51616
sp|Q9UHD9|UBQL2_HUMAN	UBQLN2	Ubiquilin-2 OS=Homo sapiens OX=9606 GN=UBQLN2 PE=1 SV=2	-0.38731	5.98836	-2.21417	0.0325681	0.547333	-3.52601
sp|Q9UIB8|SLAF5_HUMAN	CD84	SLAM family member 5 OS=Homo sapiens OX=9606 GN=CD84 PE=1 SV=1	-0.579313	6.1983	-2.21528	0.0326367	0.547333	-3.52624
sp|P51784|UBP11_HUMAN	USP11	Ubiquitin carboxyl-terminal hydrolase 11 OS=Homo sapiens OX=9606 GN=USP11 PE=1 SV=3	0.364694	6.07145	2.2863	0.0309498	0.540259	-3.53076
sp|Q9H6K4|OPA3_HUMAN	OPA3	Optic atrophy 3 protein OS=Homo sapiens OX=9606 GN=OPA3 PE=1 SV=1	-0.365601	7.77041	-2.20738	0.0330751	0.550177	-3.53673
sp|Q9BY44|EIF2A_HUMAN	EIF2A	Eukaryotic translation initiation factor 2A OS=Homo sapiens OX=9606 GN=EIF2A PE=1 SV=3	0.387374	6.55148	2.20052	0.0335941	0.551505	-3.54752
sp|Q9NXU5|ARL15_HUMAN	ARL15	ADP-ribosylation factor-like protein 15 OS=Homo sapiens OX=9606 GN=ARL15 PE=1 SV=1	0.32149	7.23156	2.19755	0.0334056	0.551505	-3.54874
sp|O15230|LAMA5_HUMAN	LAMA5	Laminin subunit alpha-5 OS=Homo sapiens OX=9606 GN=LAMA5 PE=1 SV=8	-0.239688	6.84322	-2.19716	0.0334354	0.551505	-3.54937
sp|P48454|PP2BC_HUMAN	PPP3CC	Serine/threonine-protein phosphatase 2B catalytic subunit gamma isoform OS=Homo sapiens OX=9606 GN=PPP3CC PE=1 SV=3	-0.610562	7.43375	-2.25184	0.0329771	0.550177	-3.55141
sp|Q96FJ2|DYL2_HUMAN	DYNLL2	Dynein light chain 2, cytoplasmic OS=Homo sapiens OX=9606 GN=DYNLL2 PE=1 SV=1	0.474013	8.30586	2.19455	0.0337672	0.551505	-3.55439
sp|Q99816|TS101_HUMAN	TSG101	Tumor susceptibility gene 101 protein OS=Homo sapiens OX=9606 GN=TSG101 PE=1 SV=2	-0.291795	7.31362	-2.19375	0.0338289	0.551505	-3.55567
sp|Q9NVT9|ARMC1_HUMAN	ARMC1	Armadillo repeat-containing protein 1 OS=Homo sapiens OX=9606 GN=ARMC1 PE=1 SV=1	-0.363078	7.17677	-2.19236	0.0342206	0.551932	-3.56032
sp|Q92504|S39A7_HUMAN	SLC39A7	Zinc transporter SLC39A7 OS=Homo sapiens OX=9606 GN=SLC39A7 PE=1 SV=2	-0.473936	7.00397	-2.18855	0.0340987	0.551932	-3.5632
sp|Q96TA1|NIBA2_HUMAN	NIBAN2	Protein Niban 2 OS=Homo sapiens OX=9606 GN=NIBAN2 PE=1 SV=3	-0.214329	6.87018	-2.18571	0.0343199	0.551932	-3.56775
sp|Q13144|EI2BE_HUMAN	EIF2B5	Translation initiation factor eIF-2B subunit epsilon OS=Homo sapiens OX=9606 GN=EIF2B5 PE=1 SV=3	0.313373	7.02668	2.18467	0.0345344	0.551932	-3.57012
sp|Q13637|RAB32_HUMAN	RAB32	Ras-related protein Rab-32 OS=Homo sapiens OX=9606 GN=RAB32 PE=1 SV=3	-0.279645	6.66883	-2.18297	0.0345347	0.551932	-3.57214
sp|O15371|EIF3D_HUMAN	EIF3D	Eukaryotic translation initiation factor 3 subunit D OS=Homo sapiens OX=9606 GN=EIF3D PE=1 SV=1	0.444789	6.52154	2.21259	0.0349333	0.552312	-3.57414
sp|Q6P1M0|S27A4_HUMAN	SLC27A4	Long-chain fatty acid transport protein 4 OS=Homo sapiens OX=9606 GN=SLC27A4 PE=1 SV=1	0.361156	7.11244	2.18132	0.0346644	0.551932	-3.57477
sp|P83731|RL24_HUMAN	RPL24	60S ribosomal protein L24 OS=Homo sapiens OX=9606 GN=RPL24 PE=1 SV=1	-0.253108	7.77287	-2.1749	0.0351738	0.553426	-3.58503
sp|Q9UHQ9|NB5R1_HUMAN	CYB5R1	NADH-cytochrome b5 reductase 1 OS=Homo sapiens OX=9606 GN=CYB5R1 PE=1 SV=1	-0.308646	8.62063	-2.17333	0.0352992	0.553426	-3.58753
sp|P62820|RAB1A_HUMAN	RAB1A	Ras-related protein Rab-1A OS=Homo sapiens OX=9606 GN=RAB1A PE=1 SV=3	-0.366358	9.02887	-2.17028	0.0355443	0.555143	-3.59239
sp|Q9NZJ4|SACS_HUMAN	SACS	Sacsin OS=Homo sapiens OX=9606 GN=SACS PE=1 SV=2	0.32246	6.76559	2.20971	0.0361068	0.561783	-3.60439
sp|Q9NX08|COMD8_HUMAN	COMMD8	COMM domain-containing protein 8 OS=Homo sapiens OX=9606 GN=COMMD8 PE=1 SV=1	0.424086	6.15314	2.19109	0.0366063	0.564902	-3.60928
sp|P09488|GSTM1_HUMAN	GSTM1	Glutathione S-transferase Mu 1 OS=Homo sapiens OX=9606 GN=GSTM1 PE=1 SV=3	0.622198	7.55398	2.24708	0.0349582	0.552312	-3.61065
sp|P57105|SYJ2B_HUMAN	SYNJ2BP	Synaptojanin-2-binding protein OS=Homo sapiens OX=9606 GN=SYNJ2BP PE=1 SV=2	-0.292479	7.48601	-2.15828	0.0365228	0.564902	-3.61147
sp|O95139|NDUB6_HUMAN	NDUFB6	NADH dehydrogenase [ubiquinone] 1 beta subcomplex subunit 6 OS=Homo sapiens OX=9606 GN=NDUFB6 PE=1 SV=3	-0.405311	8.02615	-2.15588	0.0367214	0.564902	-3.61527
sp|P54707|AT12A_HUMAN	ATP12A	Potassium-transporting ATPase alpha chain 2 OS=Homo sapiens OX=9606 GN=ATP12A PE=1 SV=3	0.353405	6.95051	2.15344	0.037513	0.572774	-3.62207
sp|Q15582|BGH3_HUMAN	TGFBI	Transforming growth factor-beta-induced protein ig-h3 OS=Homo sapiens OX=9606 GN=TGFBI PE=1 SV=1	-0.292471	6.85068	-2.15173	0.0374982	0.572774	-3.6234
sp|Q8TF74|WIPF2_HUMAN	WIPF2	WAS/WASL-interacting protein family member 2 OS=Homo sapiens OX=9606 GN=WIPF2 PE=1 SV=1	-0.56608	5.83917	-2.27613	0.0324334	0.547333	-3.628
sp|Q13574|DGKZ_HUMAN	DGKZ	Diacylglycerol kinase zeta OS=Homo sapiens OX=9606 GN=DGKZ PE=1 SV=4	-0.272037	6.94488	-2.1498	0.0381632	0.57625	-3.6307
sp|Q9BZ71|PITM3_HUMAN	PITPNM3	Membrane-associated phosphatidylinositol transfer protein 3 OS=Homo sapiens OX=9606 GN=PITPNM3 PE=1 SV=2	0.338601	6.23629	2.14841	0.0386648	0.579547	-3.63751
sp|O75153|CLU_HUMAN	CLUH	Clustered mitochondria protein homolog OS=Homo sapiens OX=9606 GN=CLUH PE=1 SV=2	0.223875	6.89476	2.14042	0.0380232	0.57625	-3.6397
sp|P19623|SPEE_HUMAN	SRM	Spermidine synthase OS=Homo sapiens OX=9606 GN=SRM PE=1 SV=1	0.257801	7.50896	2.13969	0.0380857	0.57625	-3.64085
sp|O94910|AGRL1_HUMAN	ADGRL1	Adhesion G protein-coupled receptor L1 OS=Homo sapiens OX=9606 GN=ADGRL1 PE=1 SV=1	0.278944	7.14739	2.1359	0.0384113	0.577864	-3.64682
sp|O75064|DEN4B_HUMAN	DENND4B	DENN domain-containing protein 4B OS=Homo sapiens OX=9606 GN=DENND4B PE=1 SV=4	0.236616	6.87637	2.13051	0.0391638	0.582691	-3.65558
sp|P53582|MAP11_HUMAN	METAP1	Methionine aminopeptidase 1 OS=Homo sapiens OX=9606 GN=METAP1 PE=1 SV=2	-0.310689	6.36311	-2.13063	0.0396379	0.582691	-3.658
sp|O15244|S22A2_HUMAN	SLC22A2	Solute carrier family 22 member 2 OS=Homo sapiens OX=9606 GN=SLC22A2 PE=1 SV=2	-0.565713	6.81297	-2.12919	0.039594	0.582691	-3.65876
sp|P61970|NTF2_HUMAN	NUTF2	Nuclear transport factor 2 OS=Homo sapiens OX=9606 GN=NUTF2 PE=1 SV=1	-0.394795	7.85478	-2.13934	0.0401167	0.582784	-3.6601
sp|Q86T65|DAAM2_HUMAN	DAAM2	Disheveled-associated activator of morphogenesis 2 OS=Homo sapiens OX=9606 GN=DAAM2 PE=1 SV=3	0.243776	7.15058	2.12569	0.0393015	0.582691	-3.66286
sp|P34741|SDC2_HUMAN	SDC2	Syndecan-2 OS=Homo sapiens OX=9606 GN=SDC2 PE=1 SV=2	-0.391909	6.89666	-2.122	0.0397679	0.582691	-3.66861
sp|P62851|RS25_HUMAN	RPS25	40S ribosomal protein S25 OS=Homo sapiens OX=9606 GN=RPS25 PE=1 SV=1	-0.486556	10.3777	-2.12172	0.0396521	0.582691	-3.66908
sp|Q9UI10|EI2BD_HUMAN	EIF2B4	Translation initiation factor eIF-2B subunit delta OS=Homo sapiens OX=9606 GN=EIF2B4 PE=1 SV=2	-0.408846	6.92193	-2.11926	0.0398714	0.582691	-3.67293
sp|P46781|RS9_HUMAN	RPS9	40S ribosomal protein S9 OS=Homo sapiens OX=9606 GN=RPS9 PE=1 SV=3	-0.183937	8.27439	-2.11461	0.0402874	0.582784	-3.68019
sp|Q9Y3D6|FIS1_HUMAN	FIS1	Mitochondrial fission 1 protein OS=Homo sapiens OX=9606 GN=FIS1 PE=1 SV=2	0.233123	8.49454	2.11442	0.0403049	0.582784	-3.6805
sp|P10515|ODP2_HUMAN	DLAT	Dihydrolipoyllysine-residue acetyltransferase component of pyruvate dehydrogenase complex, mitochondrial OS=Homo sapiens OX=9606 GN=DLAT PE=1 SV=3	0.318023	7.21297	2.10852	0.0408392	0.588429	-3.6897
sp|P50225|ST1A1_HUMAN	SULT1A1	Sulfotransferase 1A1 OS=Homo sapiens OX=9606 GN=SULT1A1 PE=1 SV=3	-0.351086	7.569	-2.10509	0.0411525	0.590864	-3.69504
sp|O76062|ERG24_HUMAN	TM7SF2	Delta(14)-sterol reductase TM7SF2 OS=Homo sapiens OX=9606 GN=TM7SF2 PE=1 SV=3	-0.448453	8.49827	-2.09906	0.041851	0.596705	-3.70411
sp|Q13564|ULA1_HUMAN	NAE1	NEDD8-activating enzyme E1 regulatory subunit OS=Homo sapiens OX=9606 GN=NAE1 PE=1 SV=1	-0.316302	7.61457	-2.09815	0.0417933	0.596705	-3.70583
sp|Q9NQT4|EXOS5_HUMAN	EXOSC5	Exosome complex component RRP46 OS=Homo sapiens OX=9606 GN=EXOSC5 PE=1 SV=1	0.481765	5.45692	2.09168	0.0428484	0.599812	-3.71511
sp|Q9UBV8|PEF1_HUMAN	PEF1	Peflin OS=Homo sapiens OX=9606 GN=PEF1 PE=1 SV=1	-0.27026	8.29483	-2.09125	0.0424389	0.599812	-3.71653
sp|Q9UF11|PKHB1_HUMAN	PLEKHB1	Pleckstrin homology domain-containing family B member 1 OS=Homo sapiens OX=9606 GN=PLEKHB1 PE=1 SV=1	0.285485	7.64753	2.09102	0.04246	0.599812	-3.71688
sp|Q9NX47|MARH5_HUMAN	MARCHF5	E3 ubiquitin-protein ligase MARCHF5 OS=Homo sapiens OX=9606 GN=MARCHF5 PE=1 SV=1	0.309227	7.29476	2.09213	0.0435254	0.603749	-3.71747
sp|Q9HD42|CHM1A_HUMAN	CHMP1A	Charged multivesicular body protein 1a OS=Homo sapiens OX=9606 GN=CHMP1A PE=1 SV=1	-0.252994	8.04647	-2.08944	0.0427522	0.599812	-3.7189
sp|Q9Y224|RTRAF_HUMAN	RTRAF	RNA transcription, translation and transport factor protein OS=Homo sapiens OX=9606 GN=RTRAF PE=1 SV=1	0.248413	7.54402	2.08783	0.0427614	0.599812	-3.72181
sp|Q15388|TOM20_HUMAN	TOMM20	Mitochondrial import receptor subunit TOM20 homolog OS=Homo sapiens OX=9606 GN=TOMM20 PE=1 SV=1	-0.519743	9.21907	-2.08633	0.0430474	0.599812	-3.72367
sp|Q8IZR5|CKLF4_HUMAN	CMTM4	CKLF-like MARVEL transmembrane domain-containing protein 4 OS=Homo sapiens OX=9606 GN=CMTM4 PE=1 SV=1	-0.276761	7.62496	-2.08433	0.043095	0.599812	-3.72723
sp|P26447|S10A4_HUMAN	S100A4	Protein S100-A4 OS=Homo sapiens OX=9606 GN=S100A4 PE=1 SV=1	-0.246144	7.4285	-2.08237	0.0439021	0.604324	-3.72956
sp|Q9UJW0|DCTN4_HUMAN	DCTN4	Dynactin subunit 4 OS=Homo sapiens OX=9606 GN=DCTN4 PE=1 SV=1	0.175872	7.53527	2.0758	0.0439153	0.604324	-3.74037
sp|Q9HCH3|CPNE5_HUMAN	CPNE5	Copine-5 OS=Homo sapiens OX=9606 GN=CPNE5 PE=1 SV=2	0.292641	7.97126	2.07483	0.0440099	0.604324	-3.74187
sp|Q8N3P4|VPS8_HUMAN	VPS8	Vacuolar protein sorting-associated protein 8 homolog OS=Homo sapiens OX=9606 GN=VPS8 PE=1 SV=3	-0.161174	6.72079	-2.07189	0.0442964	0.605277	-3.74639
sp|Q9GZZ1|NAA50_HUMAN	NAA50	N-alpha-acetyltransferase 50 OS=Homo sapiens OX=9606 GN=NAA50 PE=1 SV=1	-0.238862	7.23712	-2.07088	0.0443947	0.605277	-3.74793
sp|P53805|RCAN1_HUMAN	RCAN1	Calcipressin-1 OS=Homo sapiens OX=9606 GN=RCAN1 PE=1 SV=4	0.376125	7.12679	2.06933	0.0448449	0.607634	-3.74931
sp|Q99584|S10AD_HUMAN	S100A13	Protein S100-A13 OS=Homo sapiens OX=9606 GN=S100A13 PE=1 SV=1	0.281708	8.95165	2.06958	0.0445231	0.605277	-3.74994
sp|P00533|EGFR_HUMAN	EGFR	Epidermal growth factor receptor OS=Homo sapiens OX=9606 GN=EGFR PE=1 SV=2	-0.215825	7.49381	-2.06461	0.0450131	0.607899	-3.75756
sp|Q8N468|MFD4A_HUMAN	MFSD4A	Major facilitator superfamily domain-containing protein 4A OS=Homo sapiens OX=9606 GN=MFSD4A PE=2 SV=3	-0.607938	7.96038	-2.06036	0.0462447	0.616395	-3.76262
sp|P62195|PRS8_HUMAN	PSMC5	26S proteasome regulatory subunit 8 OS=Homo sapiens OX=9606 GN=PSMC5 PE=1 SV=1	-0.148533	7.72619	-2.05928	0.0455441	0.613047	-3.76572
sp|Q9H1K0|RBNS5_HUMAN	RBSN	Rabenosyn-5 OS=Homo sapiens OX=9606 GN=RBSN PE=1 SV=2	0.364104	6.75064	2.05907	0.0474319	0.619618	-3.76998
sp|Q9Y277|VDAC3_HUMAN	VDAC3	Voltage-dependent anion-selective channel protein 3 OS=Homo sapiens OX=9606 GN=VDAC3 PE=1 SV=1	0.398501	9.8493	2.05507	0.0459674	0.615261	-3.77215
sp|O14773|TPP1_HUMAN	TPP1	Tripeptidyl-peptidase 1 OS=Homo sapiens OX=9606 GN=TPP1 PE=1 SV=2	0.166999	9.02138	2.05466	0.0460092	0.615261	-3.77278
sp|O15197|EPHB6_HUMAN	EPHB6	Ephrin type-B receptor 6 OS=Homo sapiens OX=9606 GN=EPHB6 PE=1 SV=4	0.313736	6.52848	2.0502	0.0470962	0.619618	-3.77753
sp|Q13838|DX39B_HUMAN	DDX39B	Spliceosome RNA helicase DDX39B OS=Homo sapiens OX=9606 GN=DDX39B PE=1 SV=1	0.214908	7.324	2.05032	0.0464494	0.617113	-3.7794
sp|Q9BWD1|THIC_HUMAN	ACAT2	Acetyl-CoA acetyltransferase, cytosolic OS=Homo sapiens OX=9606 GN=ACAT2 PE=1 SV=2	-0.348825	7.63816	-2.04866	0.0466192	0.617366	-3.78194
sp|Q15311|RBP1_HUMAN	RALBP1	RalA-binding protein 1 OS=Homo sapiens OX=9606 GN=RALBP1 PE=1 SV=3	-0.239464	7.19023	-2.04625	0.047682	0.619618	-3.78331
sp|P51687|SUOX_HUMAN	SUOX	Sulfite oxidase, mitochondrial OS=Homo sapiens OX=9606 GN=SUOX PE=1 SV=2	0.371941	6.2128	2.04076	0.0488568	0.624756	-3.7927
sp|Q14161|GIT2_HUMAN	GIT2	ARF GTPase-activating protein GIT2 OS=Homo sapiens OX=9606 GN=GIT2 PE=1 SV=2	-0.226434	6.86085	-2.0397	0.0476911	0.619618	-3.79458
sp|P53779|MK10_HUMAN	MAPK10	Mitogen-activated protein kinase 10 OS=Homo sapiens OX=9606 GN=MAPK10 PE=1 SV=2	0.193704	7.31561	2.03998	0.0475138	0.619618	-3.79514
sp|Q8IUA7|ABCA9_HUMAN	ABCA9	ATP-binding cassette sub-family A member 9 OS=Homo sapiens OX=9606 GN=ABCA9 PE=1 SV=1	-0.253273	7.56589	-2.03821	0.0476979	0.619618	-3.79782
sp|Q92633|LPAR1_HUMAN	LPAR1	Lysophosphatidic acid receptor 1 OS=Homo sapiens OX=9606 GN=LPAR1 PE=1 SV=3	-0.724697	6.47677	-2.03417	0.048589	0.62328	-3.80149
sp|Q6PUV4|CPLX2_HUMAN	CPLX2	Complexin-2 OS=Homo sapiens OX=9606 GN=CPLX2 PE=1 SV=2	0.238634	7.59119	2.03503	0.0480305	0.621964	-3.80264
sp|O96013|PAK4_HUMAN	PAK4	Serine/threonine-protein kinase PAK 4 OS=Homo sapiens OX=9606 GN=PAK4 PE=1 SV=1	-0.319456	6.69156	-2.03173	0.0500368	0.628069	-3.80653
sp|Q7L5N7|PCAT2_HUMAN	LPCAT2	Lysophosphatidylcholine acyltransferase 2 OS=Homo sapiens OX=9606 GN=LPCAT2 PE=1 SV=1	-0.37727	6.91626	-2.03229	0.0483192	0.622051	-3.8068
sp|O95336|6PGL_HUMAN	PGLS	6-phosphogluconolactonase OS=Homo sapiens OX=9606 GN=PGLS PE=1 SV=2	0.293302	7.38398	2.03208	0.0483412	0.622051	-3.80711
sp|O43739|CYH3_HUMAN	CYTH3	Cytohesin-3 OS=Homo sapiens OX=9606 GN=CYTH3 PE=1 SV=2	-0.372764	6.33089	-2.0291	0.0503176	0.628958	-3.80955
sp|Q9H0U3|MAGT1_HUMAN	MAGT1	Magnesium transporter protein 1 OS=Homo sapiens OX=9606 GN=MAGT1 PE=1 SV=1	-0.295979	7.75238	-2.0271	0.0493393	0.625066	-3.81194
sp|P22105|TENX_HUMAN	TNXB	Tenascin-X OS=Homo sapiens OX=9606 GN=TNXB PE=1 SV=5	0.281058	7.75885	2.02741	0.0491414	0.625066	-3.81201
sp|Q9C040|TRIM2_HUMAN	TRIM2	Tripartite motif-containing protein 2 OS=Homo sapiens OX=9606 GN=TRIM2 PE=1 SV=1	0.156651	7.51803	2.02302	0.0493057	0.625066	-3.82081
sp|Q96MW1|CCD43_HUMAN	CCDC43	Coiled-coil domain-containing protein 43 OS=Homo sapiens OX=9606 GN=CCDC43 PE=1 SV=2	-0.369679	5.74674	-2.01919	0.0513894	0.628958	-3.82318
sp|Q71UM5|RS27L_HUMAN	RPS27L	40S ribosomal protein S27-like OS=Homo sapiens OX=9606 GN=RPS27L PE=1 SV=3	-0.330348	7.9986	-2.01868	0.0512166	0.628958	-3.82385
sp|P61254|RL26_HUMAN	RPL26	60S ribosomal protein L26 OS=Homo sapiens OX=9606 GN=RPL26 PE=1 SV=1	-0.160068	8.02463	-2.01901	0.0497373	0.628069	-3.82685
sp|Q96FW1|OTUB1_HUMAN	OTUB1	Ubiquitin thioesterase OTUB1 OS=Homo sapiens OX=9606 GN=OTUB1 PE=1 SV=2	0.161603	8.11735	2.0172	0.0499333	0.628069	-3.82957
sp|Q969Q0|RL36L_HUMAN	RPL36AL	60S ribosomal protein L36a-like OS=Homo sapiens OX=9606 GN=RPL36AL PE=1 SV=3	-0.245238	8.30176	-2.01248	0.0505986	0.628958	-3.83539
sp|Q9Y2C4|EXOG_HUMAN	EXOG	Nuclease EXOG, mitochondrial OS=Homo sapiens OX=9606 GN=EXOG PE=1 SV=2	-0.320447	6.74668	-2.01227	0.0504712	0.628958	-3.83699
sp|P48509|CD151_HUMAN	CD151	CD151 antigen OS=Homo sapiens OX=9606 GN=CD151 PE=1 SV=3	-0.529367	8.87152	-2.00903	0.0511362	0.628958	-3.8395
sp|Q8WZA9|IRGQ_HUMAN	IRGQ	Immunity-related GTPase family Q protein OS=Homo sapiens OX=9606 GN=IRGQ PE=1 SV=1	-0.188707	7.4707	-2.00943	0.0507825	0.628958	-3.84124
sp|Q9BSA9|TM175_HUMAN	TMEM175	Endosomal/lysosomal proton channel TMEM175 OS=Homo sapiens OX=9606 GN=TMEM175 PE=1 SV=1	0.38141	6.59172	2.00287	0.053702	0.631462	-3.84872
sp|Q9NZZ3|CHMP5_HUMAN	CHMP5	Charged multivesicular body protein 5 OS=Homo sapiens OX=9606 GN=CHMP5 PE=1 SV=1	-0.568359	6.81356	-2.00093	0.0534159	0.631164	-3.84909
sp|Q7L099|RUFY3_HUMAN	RUFY3	Protein RUFY3 OS=Homo sapiens OX=9606 GN=RUFY3 PE=1 SV=1	0.150033	8.07991	2.00386	0.0513991	0.628958	-3.84959
sp|P35813|PPM1A_HUMAN	PPM1A	Protein phosphatase 1A OS=Homo sapiens OX=9606 GN=PPM1A PE=1 SV=1	0.123127	7.44949	2.00304	0.0514909	0.628958	-3.85083
sp|P60903|S10AA_HUMAN	S100A10	Protein S100-A10 OS=Homo sapiens OX=9606 GN=S100A10 PE=1 SV=2	-0.544659	9.62418	-1.99928	0.0519113	0.631164	-3.85645
tr|A0A087WTZ8|A0A087WTZ8_HUMAN	NSMCE2	NSE2 (MMS21) homolog, SMC5-SMC6 complex SUMO ligase OS=Homo sapiens OX=9606 GN=NSMCE2 PE=1 SV=1	0.322745	6.93778	1.99651	0.0523749	0.631164	-3.85913
sp|P55060|XPO2_HUMAN	CSE1L	Exportin-2 OS=Homo sapiens OX=9606 GN=CSE1L PE=1 SV=3	-0.150237	7.37605	-1.99668	0.0522038	0.631164	-3.86033
sp|Q969Q5|RAB24_HUMAN	RAB24	Ras-related protein Rab-24 OS=Homo sapiens OX=9606 GN=RAB24 PE=1 SV=1	-0.211039	7.10451	-1.99392	0.0525161	0.631164	-3.86445
sp|P46779|RL28_HUMAN	RPL28	60S ribosomal protein L28 OS=Homo sapiens OX=9606 GN=RPL28 PE=1 SV=3	-0.181365	8.82658	-1.9933	0.0525857	0.631164	-3.86536
sp|P63244|RACK1_HUMAN	RACK1	Receptor of activated protein C kinase 1 OS=Homo sapiens OX=9606 GN=RACK1 PE=1 SV=3	-0.213453	7.7271	-1.99314	0.0526042	0.631164	-3.86561
sp|Q9UH62|ARMX3_HUMAN	ARMCX3	Armadillo repeat-containing X-linked protein 3 OS=Homo sapiens OX=9606 GN=ARMCX3 PE=1 SV=1	-0.158156	6.70158	-1.99159	0.05278	0.631164	-3.86791
sp|Q9Y3D7|TIM16_HUMAN	PAM16	Mitochondrial import inner membrane translocase subunit TIM16 OS=Homo sapiens OX=9606 GN=PAM16 PE=1 SV=2	-0.251682	7.50883	-1.98328	0.054987	0.632235	-3.87304
sp|P19397|CD53_HUMAN	CD53	Leukocyte surface antigen CD53 OS=Homo sapiens OX=9606 GN=CD53 PE=1 SV=1	-0.319442	11.4729	-1.98644	0.0535225	0.631164	-3.87402
sp|P30040|ERP29_HUMAN	ERP29	Endoplasmic reticulum resident protein 29 OS=Homo sapiens OX=9606 GN=ERP29 PE=1 SV=4	0.340541	7.07604	1.98735	0.0532656	0.631164	-3.87423
sp|P61353|RL27_HUMAN	RPL27	60S ribosomal protein L27 OS=Homo sapiens OX=9606 GN=RPL27 PE=1 SV=2	-0.18091	8.95976	-1.98604	0.0534157	0.631164	-3.87618
sp|Q16774|KGUA_HUMAN	GUK1	Guanylate kinase OS=Homo sapiens OX=9606 GN=GUK1 PE=1 SV=2	0.172001	7.79079	1.98598	0.0534229	0.631164	-3.87627
sp|P82932|RT06_HUMAN	MRPS6	28S ribosomal protein S6, mitochondrial OS=Homo sapiens OX=9606 GN=MRPS6 PE=1 SV=3	0.271883	6.69204	1.97823	0.0560329	0.633389	-3.88056
sp|P55268|LAMB2_HUMAN	LAMB2	Laminin subunit beta-2 OS=Homo sapiens OX=9606 GN=LAMB2 PE=1 SV=2	-0.211703	7.22506	-1.9821	0.0538705	0.631628	-3.88203
sp|P22413|ENPP1_HUMAN	ENPP1	Ectonucleotide pyrophosphatase/phosphodiesterase family member 1 OS=Homo sapiens OX=9606 GN=ENPP1 PE=1 SV=2	-0.345936	6.89067	-1.97269	0.0560217	0.633389	-3.88876
sp|P35222|CTNB1_HUMAN	CTNNB1	Catenin beta-1 OS=Homo sapiens OX=9606 GN=CTNNB1 PE=1 SV=1	0.158988	7.43552	1.97645	0.0545292	0.632235	-3.89041
sp|P29966|MARCS_HUMAN	MARCKS	Myristoylated alanine-rich C-kinase substrate OS=Homo sapiens OX=9606 GN=MARCKS PE=1 SV=4	-0.329816	8.67084	-1.97383	0.0548365	0.632235	-3.89428
sp|Q96GC9|VMP1_HUMAN	VMP1	Vacuole membrane protein 1 OS=Homo sapiens OX=9606 GN=VMP1 PE=1 SV=1	-0.277029	6.68385	-1.96989	0.0557888	0.633389	-3.89552
sp|P80723|BASP1_HUMAN	BASP1	Brain acid soluble protein 1 OS=Homo sapiens OX=9606 GN=BASP1 PE=1 SV=2	-0.350777	10.3268	-1.97177	0.0550794	0.632235	-3.89733
sp|Q8IU85|KCC1D_HUMAN	CAMK1D	Calcium/calmodulin-dependent protein kinase type 1D OS=Homo sapiens OX=9606 GN=CAMK1D PE=1 SV=1	0.2281	7.48736	1.97133	0.0551315	0.632235	-3.89798
sp|P02751|FINC_HUMAN	FN1	Fibronectin OS=Homo sapiens OX=9606 GN=FN1 PE=1 SV=5	-0.220884	6.81209	-1.97126	0.0551391	0.632235	-3.89807
sp|Q13613|MTMR1_HUMAN	MTMR1	Myotubularin-related protein 1 OS=Homo sapiens OX=9606 GN=MTMR1 PE=1 SV=4	-0.189704	7.26696	-1.97101	0.055169	0.632235	-3.89845
sp|P36578|RL4_HUMAN	RPL4	60S ribosomal protein L4 OS=Homo sapiens OX=9606 GN=RPL4 PE=1 SV=5	-0.166526	7.36633	-1.9706	0.055218	0.632235	-3.89906
sp|O14495|PLPP3_HUMAN	PLPP3	Phospholipid phosphatase 3 OS=Homo sapiens OX=9606 GN=PLPP3 PE=1 SV=1	-0.279872	7.99476	-1.9698	0.0553128	0.632235	-3.90024
sp|Q14696|MESD_HUMAN	MESD	LRP chaperone MESD OS=Homo sapiens OX=9606 GN=MESD PE=1 SV=2	0.331813	6.81869	1.9739	0.0590746	0.634747	-3.90248
sp|Q9Y287|ITM2B_HUMAN	ITM2B	Integral membrane protein 2B OS=Homo sapiens OX=9606 GN=ITM2B PE=1 SV=1	-0.418456	7.48566	-1.97801	0.0590136	0.634747	-3.90256
sp|O00230|CORT_HUMAN	CORT	Cortistatin OS=Homo sapiens OX=9606 GN=CORT PE=1 SV=1	0.392063	7.28478	1.97423	0.0594659	0.634747	-3.90707
sp|P06703|S10A6_HUMAN	S100A6	Protein S100-A6 OS=Homo sapiens OX=9606 GN=S100A6 PE=1 SV=1	-0.418422	8.92015	-1.96416	0.0559844	0.633389	-3.90855
sp|Q9UHW9|S12A6_HUMAN	SLC12A6	Solute carrier family 12 member 6 OS=Homo sapiens OX=9606 GN=SLC12A6 PE=1 SV=2	-0.326522	6.63305	-1.95564	0.0585093	0.634747	-3.91137
sp|O95631|NET1_HUMAN	NTN1	Netrin-1 OS=Homo sapiens OX=9606 GN=NTN1 PE=1 SV=2	-0.408037	7.18411	-1.95512	0.0596129	0.634747	-3.91354
sp|Q9UBU2|DKK2_HUMAN	DKK2	Dickkopf-related protein 2 OS=Homo sapiens OX=9606 GN=DKK2 PE=1 SV=1	-0.347662	6.32519	-1.95806	0.0570377	0.634747	-3.9141
sp|O75170|PP6R2_HUMAN	PPP6R2	Serine/threonine-protein phosphatase 6 regulatory subunit 2 OS=Homo sapiens OX=9606 GN=PPP6R2 PE=1 SV=2	-0.143769	6.82683	-1.95899	0.0566073	0.634747	-3.91617
sp|Q9BXW6|OSBL1_HUMAN	OSBPL1A	Oxysterol-binding protein-related protein 1 OS=Homo sapiens OX=9606 GN=OSBPL1A PE=1 SV=2	-0.165913	7.08834	-1.9571	0.0568358	0.634747	-3.91894
sp|Q6XQN6|PNCB_HUMAN	NAPRT	Nicotinate phosphoribosyltransferase OS=Homo sapiens OX=9606 GN=NAPRT PE=1 SV=2	-0.309345	6.88433	-1.95466	0.057289	0.634747	-3.92064
sp|P62937|PPIA_HUMAN	PPIA	Peptidyl-prolyl cis-trans isomerase A OS=Homo sapiens OX=9606 GN=PPIA PE=1 SV=2	0.19537	10.1418	1.95383	0.0572345	0.634747	-3.92375
sp|Q9UBQ6|EXTL2_HUMAN	EXTL2	Exostosin-like 2 OS=Homo sapiens OX=9606 GN=EXTL2 PE=1 SV=1	0.319872	6.64448	1.94879	0.0610267	0.634747	-3.92472
sp|P15529|MCP_HUMAN	CD46	Membrane cofactor protein OS=Homo sapiens OX=9606 GN=CD46 PE=1 SV=3	-0.200891	7.5478	-1.95175	0.0574881	0.634747	-3.92679
sp|P09543|CN37_HUMAN	CNP	2',3'-cyclic-nucleotide 3'-phosphodiesterase OS=Homo sapiens OX=9606 GN=CNP PE=1 SV=2	0.268153	11.6605	1.95133	0.0575398	0.634747	-3.92741
sp|Q9HB90|RRAGC_HUMAN	RRAGC	Ras-related GTP-binding protein C OS=Homo sapiens OX=9606 GN=RRAGC PE=1 SV=1	0.212699	7.96647	1.95092	0.0575906	0.634747	-3.92801
sp|Q9NQP4|PFD4_HUMAN	PFDN4	Prefoldin subunit 4 OS=Homo sapiens OX=9606 GN=PFDN4 PE=1 SV=1	0.312326	7.0831	1.95069	0.0576181	0.634747	-3.92834
sp|P49590|SYHM_HUMAN	HARS2	Histidine--tRNA ligase, mitochondrial OS=Homo sapiens OX=9606 GN=HARS2 PE=1 SV=1	0.394332	7.18732	1.94656	0.0586209	0.634747	-3.92906
sp|O15069|NACAD_HUMAN	NACAD	NAC-alpha domain-containing protein 1 OS=Homo sapiens OX=9606 GN=NACAD PE=1 SV=3	0.227758	6.93594	1.94412	0.0591055	0.634747	-3.93007
sp|Q5EBM0|CMPK2_HUMAN	CMPK2	UMP-CMP kinase 2, mitochondrial OS=Homo sapiens OX=9606 GN=CMPK2 PE=1 SV=3	0.349812	7.17051	1.95172	0.0622245	0.634747	-3.93345
sp|Q6ZTN6|AN13D_HUMAN	ANKRD13D	Ankyrin repeat domain-containing protein 13D OS=Homo sapiens OX=9606 GN=ANKRD13D PE=1 SV=3	0.242665	6.75746	1.94397	0.0623578	0.634747	-3.93719
sp|Q99435|NELL2_HUMAN	NELL2	Protein kinase C-binding protein NELL2 OS=Homo sapiens OX=9606 GN=NELL2 PE=1 SV=1	0.221546	6.76227	1.93574	0.0605517	0.634747	-3.94047
sp|P62917|RL8_HUMAN	RPL8	60S ribosomal protein L8 OS=Homo sapiens OX=9606 GN=RPL8 PE=1 SV=2	-0.211488	8.4019	-1.94238	0.0586468	0.634747	-3.9405
sp|P62913|RL11_HUMAN	RPL11	60S ribosomal protein L11 OS=Homo sapiens OX=9606 GN=RPL11 PE=1 SV=2	-0.314125	9.08912	-1.93966	0.0589863	0.634747	-3.94446
sp|Q9NPA0|EMC7_HUMAN	EMC7	ER membrane protein complex subunit 7 OS=Homo sapiens OX=9606 GN=EMC7 PE=1 SV=1	-0.279613	6.86164	-1.93595	0.0594534	0.634747	-3.94988
sp|P62745|RHOB_HUMAN	RHOB	Rho-related GTP-binding protein RhoB OS=Homo sapiens OX=9606 GN=RHOB PE=1 SV=1	0.159676	9.14201	1.93118	0.0600583	0.634747	-3.95682
sp|Q9UGM6|SYWM_HUMAN	WARS2	Tryptophan--tRNA ligase, mitochondrial OS=Homo sapiens OX=9606 GN=WARS2 PE=1 SV=1	0.271075	7.27945	1.92515	0.0613277	0.634747	-3.95897
sp|Q86WG5|MTMRD_HUMAN	SBF2	Myotubularin-related protein 13 OS=Homo sapiens OX=9606 GN=SBF2 PE=1 SV=1	-0.160509	6.71126	-1.92758	0.0606759	0.634747	-3.95988
sp|Q9Y3F4|STRAP_HUMAN	STRAP	Serine-threonine kinase receptor-associated protein OS=Homo sapiens OX=9606 GN=STRAP PE=1 SV=1	0.121926	7.07361	1.92701	0.0605899	0.634747	-3.96286
sp|Q53T59|H1BP3_HUMAN	HS1BP3	HCLS1-binding protein 3 OS=Homo sapiens OX=9606 GN=HS1BP3 PE=1 SV=1	-0.218506	6.79017	-1.92367	0.0613444	0.634747	-3.96328
sp|Q9UGT4|SUSD2_HUMAN	SUSD2	Sushi domain-containing protein 2 OS=Homo sapiens OX=9606 GN=SUSD2 PE=1 SV=1	-0.395547	8.59195	-1.92645	0.0606629	0.634747	-3.96369
sp|Q96NT1|NP1L5_HUMAN	NAP1L5	Nucleosome assembly protein 1-like 5 OS=Homo sapiens OX=9606 GN=NAP1L5 PE=1 SV=1	0.204296	7.13456	1.92448	0.0609156	0.634747	-3.96654
sp|Q16602|CALRL_HUMAN	CALCRL	Calcitonin gene-related peptide type 1 receptor OS=Homo sapiens OX=9606 GN=CALCRL PE=1 SV=3	-0.349374	6.56672	-1.91972	0.0620317	0.634747	-3.96666
sp|Q6ZT21|TMPPE_HUMAN	TMPPE	Transmembrane protein with metallophosphoesterase domain OS=Homo sapiens OX=9606 GN=TMPPE PE=1 SV=2	0.422406	6.84852	1.92245	0.0613367	0.634747	-3.96727
sp|Q7L8C5|SYT13_HUMAN	SYT13	Synaptotagmin-13 OS=Homo sapiens OX=9606 GN=SYT13 PE=1 SV=1	-0.302572	6.73395	-1.91257	0.0647671	0.644834	-3.96875
sp|Q15084|PDIA6_HUMAN	PDIA6	Protein disulfide-isomerase A6 OS=Homo sapiens OX=9606 GN=PDIA6 PE=1 SV=1	0.355015	7.08379	1.92216	0.0612155	0.634747	-3.9699
sp|O75832|PSD10_HUMAN	PSMD10	26S proteasome non-ATPase regulatory subunit 10 OS=Homo sapiens OX=9606 GN=PSMD10 PE=1 SV=1	-0.232654	7.21719	-1.92163	0.0612839	0.634747	-3.97067
sp|O75592|MYCB2_HUMAN	MYCBP2	E3 ubiquitin-protein ligase MYCBP2 OS=Homo sapiens OX=9606 GN=MYCBP2 PE=1 SV=4	-0.181788	6.75706	-1.92105	0.0613586	0.634747	-3.9715
sp|P51572|BAP31_HUMAN	BCAP31	B-cell receptor-associated protein 31 OS=Homo sapiens OX=9606 GN=BCAP31 PE=1 SV=3	-0.206317	7.71389	-1.92068	0.0614063	0.634747	-3.97203
sp|O75145|LIPA3_HUMAN	PPFIA3	Liprin-alpha-3 OS=Homo sapiens OX=9606 GN=PPFIA3 PE=1 SV=3	0.170677	7.19858	1.91956	0.0615524	0.634747	-3.97366
sp|P28907|CD38_HUMAN	CD38	ADP-ribosyl cyclase/cyclic ADP-ribose hydrolase 1 OS=Homo sapiens OX=9606 GN=CD38 PE=1 SV=2	0.227641	7.69424	1.91634	0.0619716	0.634747	-3.97831
sp|O43852|CALU_HUMAN	CALU	Calumenin OS=Homo sapiens OX=9606 GN=CALU PE=1 SV=2	-0.285084	7.91749	-1.91502	0.0621447	0.634747	-3.98022
sp|B9A064|IGLL5_HUMAN	IGLL5	Immunoglobulin lambda-like polypeptide 5 OS=Homo sapiens OX=9606 GN=IGLL5 PE=2 SV=2	-0.408923	7.66466	-1.9136	0.0623316	0.634747	-3.98228
sp|O00291|HIP1_HUMAN	HIP1	Huntingtin-interacting protein 1 OS=Homo sapiens OX=9606 GN=HIP1 PE=1 SV=5	0.222704	6.75739	1.91105	0.0628263	0.636349	-3.98362
sp|P05455|LA_HUMAN	SSB	Lupus La protein OS=Homo sapiens OX=9606 GN=SSB PE=1 SV=2	-0.194867	6.86955	-1.91073	0.0627094	0.636349	-3.98641
sp|Q96AX2|RAB37_HUMAN	RAB37	Ras-related protein Rab-37 OS=Homo sapiens OX=9606 GN=RAB37 PE=1 SV=3	-0.343793	7.20557	-1.90232	0.0645172	0.644834	-3.98962
sp|Q9BU23|LMF2_HUMAN	LMF2	Lipase maturation factor 2 OS=Homo sapiens OX=9606 GN=LMF2 PE=1 SV=2	-0.455633	7.74133	-1.89505	0.0671285	0.653703	-3.9911
sp|O15118|NPC1_HUMAN	NPC1	NPC intracellular cholesterol transporter 1 OS=Homo sapiens OX=9606 GN=NPC1 PE=1 SV=2	-0.146193	7.20698	-1.90628	0.0632997	0.638221	-3.99282
sp|Q08722|CD47_HUMAN	CD47	Leukocyte surface antigen CD47 OS=Homo sapiens OX=9606 GN=CD47 PE=1 SV=1	-0.443342	9.70596	-1.90545	0.0634101	0.638221	-3.99401
sp|Q8N0X7|SPART_HUMAN	SPART	Spartin OS=Homo sapiens OX=9606 GN=SPART PE=1 SV=1	-0.182833	6.76275	-1.90493	0.063479	0.638221	-3.99475
sp|O75077|ADA23_HUMAN	ADAM23	Disintegrin and metalloproteinase domain-containing protein 23 OS=Homo sapiens OX=9606 GN=ADAM23 PE=1 SV=1	0.308099	7.40641	1.9026	0.0637903	0.639779	-3.9981
sp|Q92743|HTRA1_HUMAN	HTRA1	Serine protease HTRA1 OS=Homo sapiens OX=9606 GN=HTRA1 PE=1 SV=1	0.265037	8.09918	1.89574	0.0647156	0.644834	-4.00794
sp|P42226|STAT6_HUMAN	STAT6	Signal transducer and activator of transcription 6 OS=Homo sapiens OX=9606 GN=STAT6 PE=1 SV=1	0.367294	6.20228	1.89653	0.0704759	0.653703	-4.00826
tr|D6R9P3|D6R9P3_HUMAN	HNRNPAB	Heterogeneous nuclear ribonucleoprotein A/B OS=Homo sapiens OX=9606 GN=HNRNPAB PE=1 SV=1	0.25885	7.09245	1.88259	0.068316	0.653703	-4.00864
sp|Q9NXR7|BABA2_HUMAN	BABAM2	BRISC and BRCA1-A complex member 2 OS=Homo sapiens OX=9606 GN=BABAM2 PE=1 SV=2	-0.230336	7.13776	-1.88825	0.0662457	0.653199	-4.01084
sp|Q01105|SET_HUMAN	SET	Protein SET OS=Homo sapiens OX=9606 GN=SET PE=1 SV=3	-0.228047	7.6406	-1.89294	0.0650972	0.646548	-4.01195
sp|Q99767|APBA2_HUMAN	APBA2	Amyloid-beta A4 precursor protein-binding family A member 2 OS=Homo sapiens OX=9606 GN=APBA2 PE=1 SV=3	0.177262	7.36118	1.88953	0.0655629	0.649596	-4.01682
sp|Q92947|GCDH_HUMAN	GCDH	Glutaryl-CoA dehydrogenase, mitochondrial OS=Homo sapiens OX=9606 GN=GCDH PE=1 SV=1	-0.239796	7.44118	-1.88339	0.0669186	0.653703	-4.01828
sp|O60884|DNJA2_HUMAN	DNAJA2	DnaJ homolog subfamily A member 2 OS=Homo sapiens OX=9606 GN=DNAJA2 PE=1 SV=1	-0.172754	8.48572	-1.88774	0.0658092	0.650462	-4.01937
sp|Q96C24|SYTL4_HUMAN	SYTL4	Synaptotagmin-like protein 4 OS=Homo sapiens OX=9606 GN=SYTL4 PE=1 SV=2	-0.298119	6.36919	-1.87187	0.06892	0.653703	-4.02992
sp|P04264|K2C1_HUMAN	KRT1	Keratin, type II cytoskeletal 1 OS=Homo sapiens OX=9606 GN=KRT1 PE=1 SV=6	-0.989381	8.21666	-1.8784	0.0672667	0.653703	-4.03001
sp|Q9NRL3|STRN4_HUMAN	STRN4	Striatin-4 OS=Homo sapiens OX=9606 GN=STRN4 PE=1 SV=2	-0.261996	7.12364	-1.86457	0.070172	0.653703	-4.03758
sp|Q9BUF5|TBB6_HUMAN	TUBB6	Tubulin beta-6 chain OS=Homo sapiens OX=9606 GN=TUBB6 PE=1 SV=1	0.223487	7.37874	1.87326	0.0678272	0.653703	-4.03996
sp|Q9GZS3|SKI8_HUMAN	SKIC8	SKI8 subunit of superkiller complex protein OS=Homo sapiens OX=9606 GN=SKIC8 PE=1 SV=1	0.200558	6.9592	1.87303	0.0678597	0.653703	-4.04029
sp|Q8N4T8|CBR4_HUMAN	CBR4	3-oxoacyl-[acyl-carrier-protein] reductase OS=Homo sapiens OX=9606 GN=CBR4 PE=1 SV=3	0.328166	7.16174	1.87108	0.068298	0.653703	-4.04033
sp|P27449|VATL_HUMAN	ATP6V0C	V-type proton ATPase 16 kDa proteolipid subunit c OS=Homo sapiens OX=9606 GN=ATP6V0C PE=1 SV=1	-0.553478	9.60581	-1.87092	0.0683205	0.653703	-4.04055
sp|Q9Y5S1|TRPV2_HUMAN	TRPV2	Transient receptor potential cation channel subfamily V member 2 OS=Homo sapiens OX=9606 GN=TRPV2 PE=1 SV=1	0.273148	7.05607	1.87262	0.067918	0.653703	-4.04087
sp|Q8NFQ8|TOIP2_HUMAN	TOR1AIP2	Torsin-1A-interacting protein 2 OS=Homo sapiens OX=9606 GN=TOR1AIP2 PE=1 SV=1	-0.382368	7.10449	-1.85394	0.0739175	0.653703	-4.04246
sp|P49754|VPS41_HUMAN	VPS41	Vacuolar protein sorting-associated protein 41 homolog OS=Homo sapiens OX=9606 GN=VPS41 PE=1 SV=3	-0.123021	6.96802	-1.8709	0.0681621	0.653703	-4.04331
sp|P62714|PP2AB_HUMAN	PPP2CB	Serine/threonine-protein phosphatase 2A catalytic subunit beta isoform OS=Homo sapiens OX=9606 GN=PPP2CB PE=1 SV=1	0.226688	7.50415	1.8706	0.068204	0.653703	-4.04373
sp|P55036|PSMD4_HUMAN	PSMD4	26S proteasome non-ATPase regulatory subunit 4 OS=Homo sapiens OX=9606 GN=PSMD4 PE=1 SV=1	0.181593	8.01803	1.86833	0.0685262	0.653703	-4.04694
sp|P15880|RS2_HUMAN	RPS2	40S ribosomal protein S2 OS=Homo sapiens OX=9606 GN=RPS2 PE=1 SV=2	-0.184479	7.76058	-1.86668	0.0687625	0.653703	-4.04928
sp|P08708|RS17_HUMAN	RPS17	40S ribosomal protein S17 OS=Homo sapiens OX=9606 GN=RPS17 PE=1 SV=2	-0.36671	7.92979	-1.86656	0.0687787	0.653703	-4.04944
sp|Q8IV01|SYT12_HUMAN	SYT12	Synaptotagmin-12 OS=Homo sapiens OX=9606 GN=SYT12 PE=1 SV=1	0.244046	7.15036	1.86331	0.0694085	0.653703	-4.05125
sp|P63092|GNAS2_HUMAN	GNAS	Guanine nucleotide-binding protein G(s) subunit alpha isoforms short OS=Homo sapiens OX=9606 GN=GNAS PE=1 SV=1	0.166305	9.32216	1.86474	0.0690402	0.653703	-4.05203
sp|Q15173|2A5B_HUMAN	PPP2R5B	Serine/threonine-protein phosphatase 2A 56 kDa regulatory subunit beta isoform OS=Homo sapiens OX=9606 GN=PPP2R5B PE=1 SV=1	0.279608	6.74635	1.85554	0.0712719	0.653703	-4.05213
sp|Q9UQ49|NEUR3_HUMAN	NEU3	Sialidase-3 OS=Homo sapiens OX=9606 GN=NEU3 PE=1 SV=1	0.227048	7.70235	1.8643	0.0691034	0.653703	-4.05265
sp|Q9NY65|TBA8_HUMAN	TUBA8	Tubulin alpha-8 chain OS=Homo sapiens OX=9606 GN=TUBA8 PE=1 SV=1	-0.315543	7.72009	-1.86175	0.0694689	0.653703	-4.05624
sp|Q562E7|WDR81_HUMAN	WDR81	WD repeat-containing protein 81 OS=Homo sapiens OX=9606 GN=WDR81 PE=1 SV=2	-0.185169	7.22894	-1.85841	0.070115	0.653703	-4.0581
sp|Q9BWH6|RPAP1_HUMAN	RPAP1	RNA polymerase II-associated protein 1 OS=Homo sapiens OX=9606 GN=RPAP1 PE=1 SV=3	-0.260874	6.40639	-1.85406	0.0710998	0.653703	-4.05818
sp|P62328|TYB4_HUMAN	TMSB4X	Thymosin beta-4 OS=Homo sapiens OX=9606 GN=TMSB4X PE=1 SV=2	0.326467	7.70416	1.86898	0.076285	0.657139	-4.06056
sp|Q96JC1|VPS39_HUMAN	VPS39	Vam6/Vps39-like protein OS=Homo sapiens OX=9606 GN=VPS39 PE=1 SV=2	0.175043	6.87744	1.85745	0.0700915	0.653703	-4.0623
sp|P02652|APOA2_HUMAN	APOA2	Apolipoprotein A-II OS=Homo sapiens OX=9606 GN=APOA2 PE=1 SV=1	-0.463372	7.92837	-1.84813	0.0721618	0.653703	-4.06427
sp|Q9UKU7|ACAD8_HUMAN	ACAD8	Isobutyryl-CoA dehydrogenase, mitochondrial OS=Homo sapiens OX=9606 GN=ACAD8 PE=1 SV=1	0.251772	7.35674	1.855	0.0704489	0.653703	-4.06576
sp|Q9UH03|SEPT3_HUMAN	SEPTIN3	Neuronal-specific septin-3 OS=Homo sapiens OX=9606 GN=SEPTIN3 PE=1 SV=3	0.217824	8.91961	1.85144	0.0709695	0.653703	-4.07076
sp|Q9BXS5|AP1M1_HUMAN	AP1M1	AP-1 complex subunit mu-1 OS=Homo sapiens OX=9606 GN=AP1M1 PE=1 SV=3	0.159084	7.63608	1.8511	0.0710185	0.653703	-4.07123
sp|P14735|IDE_HUMAN	IDE	Insulin-degrading enzyme OS=Homo sapiens OX=9606 GN=IDE PE=1 SV=4	0.368209	6.61012	1.82852	0.0781139	0.660417	-4.07294
sp|P05937|CALB1_HUMAN	CALB1	Calbindin OS=Homo sapiens OX=9606 GN=CALB1 PE=1 SV=2	-0.261437	7.01304	-1.83162	0.0760266	0.657139	-4.07424
sp|P62263|RS14_HUMAN	RPS14	40S ribosomal protein S14 OS=Homo sapiens OX=9606 GN=RPS14 PE=1 SV=3	-0.26634	9.43138	-1.84788	0.0714935	0.653703	-4.07575
sp|Q96T17|MA7D2_HUMAN	MAP7D2	MAP7 domain-containing protein 2 OS=Homo sapiens OX=9606 GN=MAP7D2 PE=1 SV=2	-0.383554	6.73476	-1.83899	0.0735247	0.653703	-4.07669
sp|P23142|FBLN1_HUMAN	FBLN1	Fibulin-1 OS=Homo sapiens OX=9606 GN=FBLN1 PE=1 SV=4	-0.163614	6.74279	-1.84624	0.0717353	0.653703	-4.07804
sp|P02749|APOH_HUMAN	APOH	Beta-2-glycoprotein 1 OS=Homo sapiens OX=9606 GN=APOH PE=1 SV=3	-0.440385	7.14582	-1.84473	0.0719591	0.653703	-4.08016
sp|P62829|RL23_HUMAN	RPL23	60S ribosomal protein L23 OS=Homo sapiens OX=9606 GN=RPL23 PE=1 SV=1	-0.344887	7.58012	-1.84439	0.0720104	0.653703	-4.08064
sp|P23396|RS3_HUMAN	RPS3	40S ribosomal protein S3 OS=Homo sapiens OX=9606 GN=RPS3 PE=1 SV=2	-0.335224	9.26904	-1.84271	0.0722594	0.653703	-4.08298
sp|Q9GZV7|HPLN2_HUMAN	HAPLN2	Hyaluronan and proteoglycan link protein 2 OS=Homo sapiens OX=9606 GN=HAPLN2 PE=1 SV=1	0.53587	9.73451	1.84192	0.0723775	0.653703	-4.08409
sp|Q15813|TBCE_HUMAN	TBCE	Tubulin-specific chaperone E OS=Homo sapiens OX=9606 GN=TBCE PE=1 SV=1	-0.178132	7.12064	-1.8377	0.0731746	0.653703	-4.08695
sp|Q9NVJ2|ARL8B_HUMAN	ARL8B	ADP-ribosylation factor-like protein 8B OS=Homo sapiens OX=9606 GN=ARL8B PE=1 SV=1	-0.165561	8.56657	-1.83934	0.0727636	0.653703	-4.0877
sp|Q16698|DECR_HUMAN	DECR1	2,4-dienoyl-CoA reductase [(3E)-enoyl-CoA-producing], mitochondrial OS=Homo sapiens OX=9606 GN=DECR1 PE=1 SV=1	-0.305896	7.98934	-1.83923	0.0727808	0.653703	-4.08786
sp|P10253|LYAG_HUMAN	GAA	Lysosomal alpha-glucosidase OS=Homo sapiens OX=9606 GN=GAA PE=1 SV=4	0.319049	7.11603	1.83917	0.0727897	0.653703	-4.08794
sp|O43236|SEPT4_HUMAN	SEPTIN4	Septin-4 OS=Homo sapiens OX=9606 GN=SEPTIN4 PE=1 SV=1	0.21338	7.64811	1.83576	0.0733016	0.653703	-4.09269
sp|Q9NP80|PLPL8_HUMAN	PNPLA8	Calcium-independent phospholipase A2-gamma OS=Homo sapiens OX=9606 GN=PNPLA8 PE=1 SV=1	-0.286875	7.35845	-1.83025	0.0744743	0.654584	-4.09404
sp|P46777|RL5_HUMAN	RPL5	60S ribosomal protein L5 OS=Homo sapiens OX=9606 GN=RPL5 PE=1 SV=3	-0.231444	6.93663	-1.83475	0.0734547	0.653703	-4.0941
sp|Q9Y3E7|CHMP3_HUMAN	CHMP3	Charged multivesicular body protein 3 OS=Homo sapiens OX=9606 GN=CHMP3 PE=1 SV=3	-0.244036	8.6003	-1.83247	0.0739649	0.653703	-4.09419
sp|P20073|ANXA7_HUMAN	ANXA7	Annexin A7 OS=Homo sapiens OX=9606 GN=ANXA7 PE=1 SV=3	-0.252223	8.56326	-1.83459	0.073478	0.653703	-4.09432
sp|O14818|PSA7_HUMAN	PSMA7	Proteasome subunit alpha type-7 OS=Homo sapiens OX=9606 GN=PSMA7 PE=1 SV=1	-0.35166	7.86402	-1.83412	0.0735495	0.653703	-4.09498
sp|P55039|DRG2_HUMAN	DRG2	Developmentally-regulated GTP-binding protein 2 OS=Homo sapiens OX=9606 GN=DRG2 PE=1 SV=1	0.215975	7.28683	1.8268	0.0751837	0.655974	-4.09543
sp|O76024|WFS1_HUMAN	WFS1	Wolframin OS=Homo sapiens OX=9606 GN=WFS1 PE=1 SV=2	-0.244472	7.74095	-1.83223	0.0738363	0.653703	-4.09761
sp|P55884|EIF3B_HUMAN	EIF3B	Eukaryotic translation initiation factor 3 subunit B OS=Homo sapiens OX=9606 GN=EIF3B PE=1 SV=3	0.175018	7.16655	1.83159	0.0739334	0.653703	-4.0985
sp|Q8WWZ7|ABCA5_HUMAN	ABCA5	Cholesterol transporter ABCA5 OS=Homo sapiens OX=9606 GN=ABCA5 PE=1 SV=2	0.214326	6.83447	1.82761	0.0747045	0.654584	-4.10089
sp|Q8NBJ9|SIDT2_HUMAN	SIDT2	SID1 transmembrane family member 2 OS=Homo sapiens OX=9606 GN=SIDT2 PE=1 SV=2	0.371962	6.55124	1.81814	0.0769168	0.657139	-4.10242
sp|P68366|TBA4A_HUMAN	TUBA4A	Tubulin alpha-4A chain OS=Homo sapiens OX=9606 GN=TUBA4A PE=1 SV=1	0.242747	10.7414	1.82824	0.0744437	0.654584	-4.10316
sp|Q9P016|THYN1_HUMAN	THYN1	Thymocyte nuclear protein 1 OS=Homo sapiens OX=9606 GN=THYN1 PE=1 SV=1	-0.230428	6.87602	-1.81568	0.0775139	0.659432	-4.10321
sp|P20916|MAG_HUMAN	MAG	Myelin-associated glycoprotein OS=Homo sapiens OX=9606 GN=MAG PE=1 SV=1	0.31697	8.51351	1.82667	0.0746838	0.654584	-4.10534
sp|O15212|PFD6_HUMAN	PFDN6	Prefoldin subunit 6 OS=Homo sapiens OX=9606 GN=PFDN6 PE=1 SV=1	0.180991	7.36426	1.82351	0.075169	0.655974	-4.10972
sp|Q7KZN9|COX15_HUMAN	COX15	Cytochrome c oxidase assembly protein COX15 homolog OS=Homo sapiens OX=9606 GN=COX15 PE=1 SV=1	-0.351194	6.87254	-1.79778	0.0829738	0.66248	-4.11062
sp|O60888|CUTA_HUMAN	CUTA	Protein CutA OS=Homo sapiens OX=9606 GN=CUTA PE=1 SV=2	0.833272	5.97488	1.79569	0.0841414	0.662543	-4.11204
sp|Q9Y3D9|RT23_HUMAN	MRPS23	28S ribosomal protein S23, mitochondrial OS=Homo sapiens OX=9606 GN=MRPS23 PE=1 SV=2	0.43186	6.33716	1.81575	0.0767124	0.657139	-4.11386
sp|Q6NUK1|SCMC1_HUMAN	SLC25A24	Calcium-binding mitochondrial carrier protein SCaMC-1 OS=Homo sapiens OX=9606 GN=SLC25A24 PE=1 SV=2	-0.298049	8.05771	-1.81761	0.0760831	0.657139	-4.1179
sp|P21266|GSTM3_HUMAN	GSTM3	Glutathione S-transferase Mu 3 OS=Homo sapiens OX=9606 GN=GSTM3 PE=1 SV=3	-0.257575	8.57705	-1.81527	0.0764484	0.657139	-4.12113
sp|Q07065|CKAP4_HUMAN	CKAP4	Cytoskeleton-associated protein 4 OS=Homo sapiens OX=9606 GN=CKAP4 PE=1 SV=2	-0.28187	7.71094	-1.81393	0.0766579	0.657139	-4.12298
sp|O60220|TIM8A_HUMAN	TIMM8A	Mitochondrial import inner membrane translocase subunit Tim8 A OS=Homo sapiens OX=9606 GN=TIMM8A PE=1 SV=1	0.196816	7.89951	1.81357	0.0767135	0.657139	-4.12347
sp|Q9NWS8|RMND1_HUMAN	RMND1	Required for meiotic nuclear division protein 1 homolog OS=Homo sapiens OX=9606 GN=RMND1 PE=1 SV=2	0.412772	6.82523	1.81323	0.0767676	0.657139	-4.12395
sp|P55010|IF5_HUMAN	EIF5	Eukaryotic translation initiation factor 5 OS=Homo sapiens OX=9606 GN=EIF5 PE=1 SV=2	-0.249075	6.80491	-1.81196	0.0769675	0.657139	-4.12571
sp|P62847|RS24_HUMAN	RPS24	40S ribosomal protein S24 OS=Homo sapiens OX=9606 GN=RPS24 PE=1 SV=1	-0.189187	7.09928	-1.81122	0.0770837	0.657139	-4.12673
sp|Q96H20|SNF8_HUMAN	SNF8	Vacuolar-sorting protein SNF8 OS=Homo sapiens OX=9606 GN=SNF8 PE=1 SV=1	0.256238	8.27792	1.80559	0.0779741	0.660417	-4.13448
sp|Q92930|RAB8B_HUMAN	RAB8B	Ras-related protein Rab-8B OS=Homo sapiens OX=9606 GN=RAB8B PE=1 SV=2	-0.201845	7.72439	-1.8049	0.0780827	0.660417	-4.13542
sp|Q13367|AP3B2_HUMAN	AP3B2	AP-3 complex subunit beta-2 OS=Homo sapiens OX=9606 GN=AP3B2 PE=1 SV=2	-0.158371	7.49932	-1.80348	0.0783096	0.660707	-4.13738
sp|Q96JB5|CK5P3_HUMAN	CDK5RAP3	CDK5 regulatory subunit-associated protein 3 OS=Homo sapiens OX=9606 GN=CDK5RAP3 PE=1 SV=2	-0.119987	6.76484	-1.79942	0.0789594	0.66248	-4.14295
sp|P51636|CAV2_HUMAN	CAV2	Caveolin-2 OS=Homo sapiens OX=9606 GN=CAV2 PE=1 SV=2	-0.621469	8.48266	-1.79689	0.0795339	0.66248	-4.143
sp|O75438|NDUB1_HUMAN	NDUFB1	NADH dehydrogenase [ubiquinone] 1 beta subcomplex subunit 1 OS=Homo sapiens OX=9606 GN=NDUFB1 PE=1 SV=1	-0.410214	9.28421	-1.79627	0.0796334	0.66248	-4.14384
sp|Q4J6C6|PPCEL_HUMAN	PREPL	Prolyl endopeptidase-like OS=Homo sapiens OX=9606 GN=PREPL PE=1 SV=1	0.188673	7.15823	1.79648	0.0794321	0.66248	-4.14697
sp|P07711|CATL1_HUMAN	CTSL	Procathepsin L OS=Homo sapiens OX=9606 GN=CTSL PE=1 SV=2	0.268924	6.70489	1.77733	0.0841864	0.662543	-4.14738
sp|O75558|STX11_HUMAN	STX11	Syntaxin-11 OS=Homo sapiens OX=9606 GN=STX11 PE=1 SV=1	-0.520714	6.53697	-1.76496	0.090253	0.66961	-4.14796
sp|O60502|OGA_HUMAN	OGA	Protein O-GlcNAcase OS=Homo sapiens OX=9606 GN=OGA PE=1 SV=2	-0.18329	7.47084	-1.79533	0.0796188	0.66248	-4.14855
sp|P78368|KC1G2_HUMAN	CSNK1G2	Casein kinase I isoform gamma-2 OS=Homo sapiens OX=9606 GN=CSNK1G2 PE=1 SV=1	0.267488	6.96656	1.7927	0.0802119	0.66248	-4.14869
sp|O95810|CAVN2_HUMAN	CAVIN2	Caveolae-associated protein 2 OS=Homo sapiens OX=9606 GN=CAVIN2 PE=1 SV=3	-0.266549	7.8615	-1.79517	0.0796435	0.66248	-4.14876
sp|P42330|AK1C3_HUMAN	AKR1C3	Aldo-keto reductase family 1 member C3 OS=Homo sapiens OX=9606 GN=AKR1C3 PE=1 SV=4	-0.283365	7.80069	-1.79482	0.0797007	0.66248	-4.14925
sp|Q9NUY8|TBC23_HUMAN	TBC1D23	TBC1 domain family member 23 OS=Homo sapiens OX=9606 GN=TBC1D23 PE=1 SV=3	0.274316	6.90978	1.76133	0.0894724	0.66961	-4.15253
sp|P36776|LONM_HUMAN	LONP1	Lon protease homolog, mitochondrial OS=Homo sapiens OX=9606 GN=LONP1 PE=1 SV=2	0.232116	7.21237	1.79089	0.08034	0.66248	-4.15463
sp|P14621|ACYP2_HUMAN	ACYP2	Acylphosphatase-2 OS=Homo sapiens OX=9606 GN=ACYP2 PE=1 SV=2	-0.20006	7.96879	-1.79086	0.080344	0.66248	-4.15466
sp|P16870|CBPE_HUMAN	CPE	Carboxypeptidase E OS=Homo sapiens OX=9606 GN=CPE PE=1 SV=1	0.248663	7.05997	1.78802	0.080976	0.66248	-4.15504
sp|Q9NZG7|NINJ2_HUMAN	NINJ2	Ninjurin-2 OS=Homo sapiens OX=9606 GN=NINJ2 PE=1 SV=1	0.300822	7.6916	1.78951	0.0805651	0.66248	-4.15651
sp|Q9H6L2|TM231_HUMAN	TMEM231	Transmembrane protein 231 OS=Homo sapiens OX=9606 GN=TMEM231 PE=1 SV=1	-0.500077	7.03054	-1.75704	0.0894376	0.66961	-4.15941
sp|P03905|NU4M_HUMAN	MT-ND4	NADH-ubiquinone oxidoreductase chain 4 OS=Homo sapiens OX=9606 GN=MT-ND4 PE=1 SV=1	-0.287917	8.54993	-1.78571	0.0811875	0.66248	-4.16169
sp|Q9UBP0|SPAST_HUMAN	SPAST	Spastin OS=Homo sapiens OX=9606 GN=SPAST PE=1 SV=1	0.466017	6.89015	1.74877	0.0912573	0.66961	-4.1617
sp|Q14376|GALE_HUMAN	GALE	UDP-glucose 4-epimerase OS=Homo sapiens OX=9606 GN=GALE PE=1 SV=2	-0.2614	6.29128	-1.78024	0.0824347	0.66248	-4.16227
sp|P15559|NQO1_HUMAN	NQO1	NAD(P)H dehydrogenase [quinone] 1 OS=Homo sapiens OX=9606 GN=NQO1 PE=1 SV=1	-0.378112	7.51893	-1.78263	0.0818617	0.66248	-4.16233
sp|Q92629|SGCD_HUMAN	SGCD	Delta-sarcoglycan OS=Homo sapiens OX=9606 GN=SGCD PE=1 SV=2	-0.256938	7.00888	-1.78479	0.0813386	0.66248	-4.16294
sp|P50416|CPT1A_HUMAN	CPT1A	Carnitine O-palmitoyltransferase 1, liver isoform OS=Homo sapiens OX=9606 GN=CPT1A PE=1 SV=2	-0.253568	7.951	-1.78322	0.0815967	0.66248	-4.16508
sp|P0C7P0|CISD3_HUMAN	CISD3	CDGSH iron-sulfur domain-containing protein 3, mitochondrial OS=Homo sapiens OX=9606 GN=CISD3 PE=1 SV=1	-0.310338	5.74222	-1.74813	0.0917723	0.66961	-4.16725
sp|Q8TAC9|SCAM5_HUMAN	SCAMP5	Secretory carrier-associated membrane protein 5 OS=Homo sapiens OX=9606 GN=SCAMP5 PE=1 SV=1	-0.455527	9.75774	-1.77835	0.0825719	0.66248	-4.16811
sp|O75348|VATG1_HUMAN	ATP6V1G1	V-type proton ATPase subunit G 1 OS=Homo sapiens OX=9606 GN=ATP6V1G1 PE=1 SV=3	0.256443	9.93481	1.78059	0.0820325	0.66248	-4.16866
sp|Q8N1F7|NUP93_HUMAN	NUP93	Nuclear pore complex protein Nup93 OS=Homo sapiens OX=9606 GN=NUP93 PE=1 SV=2	0.255732	7.41577	1.77746	0.0827202	0.66248	-4.16931
sp|P10301|RRAS_HUMAN	RRAS	Ras-related protein R-Ras OS=Homo sapiens OX=9606 GN=RRAS PE=1 SV=1	-0.258885	8.23054	-1.77914	0.0822731	0.66248	-4.17063
sp|P68371|TBB4B_HUMAN	TUBB4B	Tubulin beta-4B chain OS=Homo sapiens OX=9606 GN=TUBB4B PE=1 SV=1	0.203142	11.2769	1.77851	0.0823786	0.66248	-4.17149
sp|P07814|SYEP_HUMAN	EPRS1	Bifunctional glutamate/proline--tRNA ligase OS=Homo sapiens OX=9606 GN=EPRS1 PE=1 SV=5	-0.0983967	7.44084	-1.77755	0.0825371	0.66248	-4.17278
sp|Q8N357|S35F6_HUMAN	SLC35F6	Solute carrier family 35 member F6 OS=Homo sapiens OX=9606 GN=SLC35F6 PE=1 SV=1	-0.234927	7.63787	-1.77697	0.0826352	0.66248	-4.17358
sp|Q9NZL9|MAT2B_HUMAN	MAT2B	Methionine adenosyltransferase 2 subunit beta OS=Homo sapiens OX=9606 GN=MAT2B PE=1 SV=1	0.182762	7.86458	1.77691	0.0826454	0.66248	-4.17366
sp|P21757|MSRE_HUMAN	MSR1	Macrophage scavenger receptor types I and II OS=Homo sapiens OX=9606 GN=MSR1 PE=1 SV=1	-0.41839	6.3222	-1.74437	0.091658	0.66961	-4.17428
sp|Q8IVB4|SL9A9_HUMAN	SLC9A9	Sodium/hydrogen exchanger 9 OS=Homo sapiens OX=9606 GN=SLC9A9 PE=1 SV=1	-0.300596	6.88957	-1.76973	0.0841941	0.662543	-4.17632
sp|Q9BZ29|DOCK9_HUMAN	DOCK9	Dedicator of cytokinesis protein 9 OS=Homo sapiens OX=9606 GN=DOCK9 PE=1 SV=2	-0.132857	7.06879	-1.77433	0.0830758	0.66248	-4.17715
sp|P35268|RL22_HUMAN	RPL22	60S ribosomal protein L22 OS=Homo sapiens OX=9606 GN=RPL22 PE=1 SV=2	-0.243269	9.40246	-1.77328	0.0832521	0.66248	-4.17858
sp|Q8IWA5|CTL2_HUMAN	SLC44A2	Choline transporter-like protein 2 OS=Homo sapiens OX=9606 GN=SLC44A2 PE=1 SV=3	-0.207822	8.12581	-1.77325	0.0832573	0.66248	-4.17862
sp|P62736|ACTA_HUMAN	ACTA2	Actin, aortic smooth muscle OS=Homo sapiens OX=9606 GN=ACTA2 PE=1 SV=1	0.268647	9.03003	1.77254	0.0833766	0.66248	-4.17958
sp|O76082|OCTN2_HUMAN	SLC22A5	Organic cation/carnitine transporter 2 OS=Homo sapiens OX=9606 GN=SLC22A5 PE=1 SV=1	-0.268542	6.98218	-1.76914	0.0841188	0.662543	-4.18051
sp|O60449|LY75_HUMAN	LY75	Lymphocyte antigen 75 OS=Homo sapiens OX=9606 GN=LY75 PE=1 SV=3	-0.326294	6.51153	-1.73904	0.0922545	0.66961	-4.1828
sp|Q2M389|WASC4_HUMAN	WASHC4	WASH complex subunit 4 OS=Homo sapiens OX=9606 GN=WASHC4 PE=1 SV=2	-0.117631	7.43669	-1.76998	0.0838079	0.662543	-4.18305
sp|P78369|CLD10_HUMAN	CLDN10	Claudin-10 OS=Homo sapiens OX=9606 GN=CLDN10 PE=1 SV=2	-0.465951	6.97118	-1.76577	0.0845219	0.663696	-4.18874
sp|O75369|FLNB_HUMAN	FLNB	Filamin-B OS=Homo sapiens OX=9606 GN=FLNB PE=1 SV=2	-0.196107	6.9226	-1.76493	0.084665	0.663696	-4.18988
sp|O00501|CLD5_HUMAN	CLDN5	Claudin-5 OS=Homo sapiens OX=9606 GN=CLDN5 PE=1 SV=1	-0.372217	8.06346	-1.74434	0.0896143	0.66961	-4.19163
sp|P56817|BACE1_HUMAN	BACE1	Beta-secretase 1 OS=Homo sapiens OX=9606 GN=BACE1 PE=1 SV=3	-0.240933	7.43957	-1.75356	0.0871514	0.66961	-4.19327
sp|P08572|CO4A2_HUMAN	COL4A2	Collagen alpha-2(IV) chain OS=Homo sapiens OX=9606 GN=COL4A2 PE=1 SV=4	-0.225802	7.51892	-1.76089	0.0853542	0.666848	-4.19531
sp|O15127|SCAM2_HUMAN	SCAMP2	Secretory carrier-associated membrane protein 2 OS=Homo sapiens OX=9606 GN=SCAMP2 PE=1 SV=2	-0.226317	6.94529	-1.76067	0.0853931	0.666848	-4.19562
sp|Q8N9F0|NAT8L_HUMAN	NAT8L	N-acetylaspartate synthetase OS=Homo sapiens OX=9606 GN=NAT8L PE=1 SV=3	-0.313325	7.72197	-1.72466	0.094853	0.66961	-4.197
sp|P61106|RAB14_HUMAN	RAB14	Ras-related protein Rab-14 OS=Homo sapiens OX=9606 GN=RAB14 PE=1 SV=4	0.142872	8.54336	1.75854	0.0857584	0.668425	-4.19848
sp|Q99961|SH3G1_HUMAN	SH3GL1	Endophilin-A2 OS=Homo sapiens OX=9606 GN=SH3GL1 PE=1 SV=1	0.435791	6.78207	1.73449	0.0913684	0.66961	-4.19936
sp|Q9UHC6|CNTP2_HUMAN	CNTNAP2	Contactin-associated protein-like 2 OS=Homo sapiens OX=9606 GN=CNTNAP2 PE=1 SV=1	0.174064	7.5696	1.75719	0.0859914	0.668968	-4.2003
sp|Q14123|PDE1C_HUMAN	PDE1C	Dual specificity calcium/calmodulin-dependent 3',5'-cyclic nucleotide phosphodiesterase 1C OS=Homo sapiens OX=9606 GN=PDE1C PE=1 SV=1	0.225201	6.80901	1.75223	0.0868507	0.66961	-4.20696
sp|Q92777|SYN2_HUMAN	SYN2	Synapsin-2 OS=Homo sapiens OX=9606 GN=SYN2 PE=1 SV=4	0.209116	9.09624	1.75198	0.0868935	0.66961	-4.20729
sp|Q8IXJ6|SIR2_HUMAN	SIRT2	NAD-dependent protein deacetylase sirtuin-2 OS=Homo sapiens OX=9606 GN=SIRT2 PE=1 SV=2	0.276892	9.29343	1.75175	0.0869337	0.66961	-4.2076
sp|Q9UMS4|PRP19_HUMAN	PRPF19	Pre-mRNA-processing factor 19 OS=Homo sapiens OX=9606 GN=PRPF19 PE=1 SV=1	-0.268527	6.33019	-1.74829	0.0877072	0.66961	-4.20838
sp|P35908|K22E_HUMAN	KRT2	Keratin, type II cytoskeletal 2 epidermal OS=Homo sapiens OX=9606 GN=KRT2 PE=1 SV=2	-0.763784	8.27334	-1.73977	0.0897713	0.66961	-4.20873
sp|Q9H444|CHM4B_HUMAN	CHMP4B	Charged multivesicular body protein 4b OS=Homo sapiens OX=9606 GN=CHMP4B PE=1 SV=1	-0.19832	8.68747	-1.74575	0.0879835	0.66961	-4.21563
sp|Q9UPQ0|LIMC1_HUMAN	LIMCH1	LIM and calponin homology domains-containing protein 1 OS=Homo sapiens OX=9606 GN=LIMCH1 PE=1 SV=4	0.166128	6.96147	1.72987	0.0915448	0.66961	-4.21966
sp|O43809|CPSF5_HUMAN	NUDT21	Cleavage and polyadenylation specificity factor subunit 5 OS=Homo sapiens OX=9606 GN=NUDT21 PE=1 SV=1	0.250799	7.2947	1.74269	0.088523	0.66961	-4.21972
sp|P04843|RPN1_HUMAN	RPN1	Dolichyl-diphosphooligosaccharide--protein glycosyltransferase subunit 1 OS=Homo sapiens OX=9606 GN=RPN1 PE=1 SV=1	-0.226638	8.38163	-1.74206	0.0886337	0.66961	-4.22056
sp|P43307|SSRA_HUMAN	SSR1	Translocon-associated protein subunit alpha OS=Homo sapiens OX=9606 GN=SSR1 PE=1 SV=3	-0.436403	8.93525	-1.73504	0.090231	0.66961	-4.22225
tr|A0A1C7CYX9|A0A1C7CYX9_HUMAN	DPYSL2	Dihydropyrimidinase like 2 OS=Homo sapiens OX=9606 GN=DPYSL2 PE=1 SV=1	-0.254942	8.26087	-1.7403	0.0889464	0.66961	-4.22291
sp|Q15654|TRIP6_HUMAN	TRIP6	Thyroid receptor-interacting protein 6 OS=Homo sapiens OX=9606 GN=TRIP6 PE=1 SV=3	-0.165307	6.39411	-1.73846	0.0892731	0.66961	-4.22536
sp|O75781|PALM_HUMAN	PALM	Paralemmin-1 OS=Homo sapiens OX=9606 GN=PALM PE=1 SV=2	-0.219581	7.64329	-1.73805	0.089347	0.66961	-4.22592
sp|Q01064|PDE1B_HUMAN	PDE1B	Dual specificity calcium/calmodulin-dependent 3',5'-cyclic nucleotide phosphodiesterase 1B OS=Homo sapiens OX=9606 GN=PDE1B PE=1 SV=2	0.173625	7.63794	1.73633	0.0896528	0.66961	-4.2282
sp|Q8N1F8|S11IP_HUMAN	STK11IP	Serine/threonine-protein kinase 11-interacting protein OS=Homo sapiens OX=9606 GN=STK11IP PE=1 SV=4	-0.17253	7.04376	-1.73576	0.0897546	0.66961	-4.22896
sp|P04844|RPN2_HUMAN	RPN2	Dolichyl-diphosphooligosaccharide--protein glycosyltransferase subunit 2 OS=Homo sapiens OX=9606 GN=RPN2 PE=1 SV=3	-0.23163	7.87191	-1.7357	0.0897666	0.66961	-4.22905
sp|Q96BS2|CHP3_HUMAN	TESC	Calcineurin B homologous protein 3 OS=Homo sapiens OX=9606 GN=TESC PE=1 SV=3	0.202923	7.91221	1.73442	0.0899953	0.66961	-4.23074
sp|P53007|TXTP_HUMAN	SLC25A1	Tricarboxylate transport protein, mitochondrial OS=Homo sapiens OX=9606 GN=SLC25A1 PE=1 SV=2	-0.289106	8.24439	-1.73005	0.0907813	0.66961	-4.23655
sp|Q9Y2R0|COA3_HUMAN	COA3	Cytochrome c oxidase assembly factor 3 homolog, mitochondrial OS=Homo sapiens OX=9606 GN=COA3 PE=1 SV=1	-0.240664	7.37982	-1.72183	0.0926242	0.66961	-4.23908
sp|P35232|PHB1_HUMAN	PHB1	Prohibitin 1 OS=Homo sapiens OX=9606 GN=PHB1 PE=1 SV=1	-0.251825	9.68822	-1.7251	0.0916772	0.66961	-4.2431
sp|P22570|ADRO_HUMAN	FDXR	NADPH:adrenodoxin oxidoreductase, mitochondrial OS=Homo sapiens OX=9606 GN=FDXR PE=1 SV=3	0.202319	7.08899	1.7241	0.0918609	0.66961	-4.24444
sp|P39060|COIA1_HUMAN	COL18A1	Collagen alpha-1(XVIII) chain OS=Homo sapiens OX=9606 GN=COL18A1 PE=1 SV=5	-0.449192	7.47854	-1.71766	0.0933895	0.66961	-4.24451
sp|A6NGN9|IGLO5_HUMAN	IGLON5	IgLON family member 5 OS=Homo sapiens OX=9606 GN=IGLON5 PE=1 SV=4	-0.192655	8.21524	-1.7203	0.0927256	0.66961	-4.24536
sp|O14683|P5I11_HUMAN	TP53I11	Tumor protein p53-inducible protein 11 OS=Homo sapiens OX=9606 GN=TP53I11 PE=1 SV=2	-0.5017	7.43531	-1.71628	0.0934645	0.66961	-4.25062
sp|P26232|CTNA2_HUMAN	CTNNA2	Catenin alpha-2 OS=Homo sapiens OX=9606 GN=CTNNA2 PE=1 SV=5	0.117841	7.30889	1.71908	0.0927788	0.66961	-4.25106
sp|Q9Y5J6|T10B_HUMAN	TIMM10B	Mitochondrial import inner membrane translocase subunit Tim10 B OS=Homo sapiens OX=9606 GN=TIMM10B PE=1 SV=1	0.31552	7.59107	1.71377	0.0939292	0.66961	-4.2539
sp|P00492|HPRT_HUMAN	HPRT1	Hypoxanthine-guanine phosphoribosyltransferase OS=Homo sapiens OX=9606 GN=HPRT1 PE=1 SV=2	0.322353	8.26624	1.71688	0.0931842	0.66961	-4.25397
sp|Q9P0K1|ADA22_HUMAN	ADAM22	Disintegrin and metalloproteinase domain-containing protein 22 OS=Homo sapiens OX=9606 GN=ADAM22 PE=1 SV=1	0.218071	7.80862	1.71688	0.0931847	0.66961	-4.25397
sp|Q9BTU6|P4K2A_HUMAN	PI4K2A	Phosphatidylinositol 4-kinase type 2-alpha OS=Homo sapiens OX=9606 GN=PI4K2A PE=1 SV=1	-0.153068	7.36061	-1.71537	0.0934623	0.66961	-4.25595
sp|Q9Y230|RUVB2_HUMAN	RUVBL2	RuvB-like 2 OS=Homo sapiens OX=9606 GN=RUVBL2 PE=1 SV=3	-0.139841	8.03173	-1.71532	0.0934727	0.66961	-4.25603
sp|P54764|EPHA4_HUMAN	EPHA4	Ephrin type-A receptor 4 OS=Homo sapiens OX=9606 GN=EPHA4 PE=1 SV=1	0.151367	7.47298	1.71468	0.0935907	0.66961	-4.25687
sp|Q8N4L2|PP4P2_HUMAN	PIP4P2	Type 2 phosphatidylinositol 4,5-bisphosphate 4-phosphatase OS=Homo sapiens OX=9606 GN=PIP4P2 PE=1 SV=1	-0.186497	7.2543	-1.71138	0.0943746	0.66961	-4.25704
tr|J3QKL5|J3QKL5_HUMAN	MBP	Myelin basic protein (Fragment) OS=Homo sapiens OX=9606 GN=MBP PE=1 SV=1	0.297068	7.16677	1.71437	0.0936484	0.66961	-4.25728
sp|Q14112|NID2_HUMAN	NID2	Nidogen-2 OS=Homo sapiens OX=9606 GN=NID2 PE=1 SV=3	0.253242	6.71362	1.66253	0.108381	0.694823	-4.25786
sp|Q9Y6N7|ROBO1_HUMAN	ROBO1	Roundabout homolog 1 OS=Homo sapiens OX=9606 GN=ROBO1 PE=1 SV=1	0.378635	5.91015	1.68856	0.100175	0.684337	-4.25819
sp|Q9Y2Q3|GSTK1_HUMAN	GSTK1	Glutathione S-transferase kappa 1 OS=Homo sapiens OX=9606 GN=GSTK1 PE=1 SV=3	0.256042	6.90589	1.71356	0.0937987	0.66961	-4.25834
sp|O00483|NDUA4_HUMAN	NDUFA4	Cytochrome c oxidase subunit NDUFA4 OS=Homo sapiens OX=9606 GN=NDUFA4 PE=1 SV=1	-0.300352	9.34363	-1.71237	0.0940199	0.66961	-4.25991
sp|Q9BUB7|TMM70_HUMAN	TMEM70	Transmembrane protein 70, mitochondrial OS=Homo sapiens OX=9606 GN=TMEM70 PE=1 SV=2	-0.272268	7.54187	-1.70546	0.0956616	0.670286	-4.26081
sp|P53794|SC5A3_HUMAN	SLC5A3	Sodium/myo-inositol cotransporter OS=Homo sapiens OX=9606 GN=SLC5A3 PE=1 SV=3	-0.332013	7.4333	-1.7116	0.0941628	0.66961	-4.26092
sp|O75844|FACE1_HUMAN	ZMPSTE24	CAAX prenyl protease 1 homolog OS=Homo sapiens OX=9606 GN=ZMPSTE24 PE=1 SV=2	-0.207922	7.01956	-1.7115	0.0941802	0.66961	-4.26104
sp|Q9UID3|VPS51_HUMAN	VPS51	Vacuolar protein sorting-associated protein 51 homolog OS=Homo sapiens OX=9606 GN=VPS51 PE=1 SV=2	0.168854	6.8544	1.7114	0.0941996	0.66961	-4.26118
sp|Q9UDY2|ZO2_HUMAN	TJP2	Tight junction protein ZO-2 OS=Homo sapiens OX=9606 GN=TJP2 PE=1 SV=2	-0.162343	7.03835	-1.71036	0.0943939	0.66961	-4.26255
sp|P46721|SO1A2_HUMAN	SLCO1A2	Solute carrier organic anion transporter family member 1A2 OS=Homo sapiens OX=9606 GN=SLCO1A2 PE=1 SV=1	-0.277125	6.62785	-1.67884	0.102607	0.687182	-4.26322
sp|Q9Y2S7|PDIP2_HUMAN	POLDIP2	Polymerase delta-interacting protein 2 OS=Homo sapiens OX=9606 GN=POLDIP2 PE=1 SV=1	0.399856	6.28281	1.65146	0.111629	0.70078	-4.26616
sp|Q15847|ADIRF_HUMAN	ADIRF	Adipogenesis regulatory factor OS=Homo sapiens OX=9606 GN=ADIRF PE=1 SV=1	-0.365287	7.11773	-1.70741	0.0949447	0.66961	-4.26642
sp|P00414|COX3_HUMAN	MT-CO3	Cytochrome c oxidase subunit 3 OS=Homo sapiens OX=9606 GN=MT-CO3 PE=1 SV=2	-0.309617	8.34866	-1.70717	0.0949901	0.66961	-4.26674
sp|P60866|RS20_HUMAN	RPS20	40S ribosomal protein S20 OS=Homo sapiens OX=9606 GN=RPS20 PE=1 SV=1	-0.368781	10.6143	-1.70709	0.0950046	0.66961	-4.26684
sp|O60493|SNX3_HUMAN	SNX3	Sorting nexin-3 OS=Homo sapiens OX=9606 GN=SNX3 PE=1 SV=3	-0.13306	7.73804	-1.70665	0.0950872	0.66961	-4.26742
sp|O94832|MYO1D_HUMAN	MYO1D	Unconventional myosin-Id OS=Homo sapiens OX=9606 GN=MYO1D PE=1 SV=2	0.231023	7.61627	1.70638	0.0951382	0.66961	-4.26778
sp|Q9BXJ8|TACAN_HUMAN	TMEM120A	Ion channel TACAN OS=Homo sapiens OX=9606 GN=TMEM120A PE=1 SV=1	-0.231099	7.003	-1.70585	0.0952378	0.66961	-4.26847
sp|Q9UBR2|CATZ_HUMAN	CTSZ	Cathepsin Z OS=Homo sapiens OX=9606 GN=CTSZ PE=1 SV=1	0.221879	7.65335	1.69915	0.0968527	0.672871	-4.26896
tr|H7BYR8|H7BYR8_HUMAN	MBP	Myelin basic protein OS=Homo sapiens OX=9606 GN=MBP PE=1 SV=1	0.392205	10.17	1.70428	0.0955332	0.670286	-4.27053
sp|P27169|PON1_HUMAN	PON1	Serum paraoxonase/arylesterase 1 OS=Homo sapiens OX=9606 GN=PON1 PE=1 SV=3	0.464643	7.28454	1.6539	0.109696	0.694857	-4.27059
sp|Q16566|KCC4_HUMAN	CAMK4	Calcium/calmodulin-dependent protein kinase type IV OS=Homo sapiens OX=9606 GN=CAMK4 PE=1 SV=1	-0.296172	7.08964	-1.68408	0.100568	0.685875	-4.2714
sp|Q9H4B7|TBB1_HUMAN	TUBB1	Tubulin beta-1 chain OS=Homo sapiens OX=9606 GN=TUBB1 PE=1 SV=1	-0.469279	7.98297	-1.65042	0.11041	0.698294	-4.27162
sp|Q03154|ACY1_HUMAN	ACY1	Aminoacylase-1 OS=Homo sapiens OX=9606 GN=ACY1 PE=1 SV=1	-0.260222	6.74973	-1.6871	0.0997605	0.682642	-4.272
sp|P62269|RS18_HUMAN	RPS18	40S ribosomal protein S18 OS=Homo sapiens OX=9606 GN=RPS18 PE=1 SV=3	-0.317573	9.33343	-1.70016	0.0963113	0.672123	-4.27592
sp|Q9BQ69|MACD1_HUMAN	MACROD1	ADP-ribose glycohydrolase MACROD1 OS=Homo sapiens OX=9606 GN=MACROD1 PE=1 SV=2	0.26085	7.29536	1.69981	0.0963769	0.672123	-4.27637
sp|Q9NRS6|SNX15_HUMAN	SNX15	Sorting nexin-15 OS=Homo sapiens OX=9606 GN=SNX15 PE=1 SV=1	-0.210778	7.37438	-1.66958	0.104165	0.689285	-4.27672
sp|Q96PQ0|SORC2_HUMAN	SORCS2	VPS10 domain-containing receptor SorCS2 OS=Homo sapiens OX=9606 GN=SORCS2 PE=1 SV=3	-0.218243	7.39956	-1.699	0.0965305	0.672123	-4.27743
sp|Q07954|LRP1_HUMAN	LRP1	Prolow-density lipoprotein receptor-related protein 1 OS=Homo sapiens OX=9606 GN=LRP1 PE=1 SV=2	-0.199442	7.95746	-1.69874	0.0965808	0.672123	-4.27778
sp|P30273|FCERG_HUMAN	FCER1G	High affinity immunoglobulin epsilon receptor subunit gamma OS=Homo sapiens OX=9606 GN=FCER1G PE=1 SV=1	-0.348868	8.93549	-1.69542	0.0973851	0.674281	-4.2778
sp|O14531|DPYL4_HUMAN	DPYSL4	Dihydropyrimidinase-related protein 4 OS=Homo sapiens OX=9606 GN=DPYSL4 PE=1 SV=2	0.175858	8.39353	1.69543	0.0972113	0.674218	-4.2821
sp|Q8TAT6|NPL4_HUMAN	NPLOC4	Nuclear protein localization protein 4 homolog OS=Homo sapiens OX=9606 GN=NPLOC4 PE=1 SV=3	0.175938	6.60919	1.6851	0.0997421	0.682642	-4.28271
sp|Q9Y5U8|MPC1_HUMAN	MPC1	Mitochondrial pyruvate carrier 1 OS=Homo sapiens OX=9606 GN=MPC1 PE=1 SV=1	-0.447266	10.3243	-1.69129	0.0981771	0.677424	-4.28315
sp|Q92561|PHYIP_HUMAN	PHYHIP	Phytanoyl-CoA hydroxylase-interacting protein OS=Homo sapiens OX=9606 GN=PHYHIP PE=1 SV=1	0.158984	8.15915	1.6916	0.097946	0.677019	-4.28709
sp|Q96ID5|IGS21_HUMAN	IGSF21	Immunoglobulin superfamily member 21 OS=Homo sapiens OX=9606 GN=IGSF21 PE=2 SV=1	0.185685	8.81437	1.68957	0.0983358	0.677424	-4.28973
sp|Q6UVY6|MOXD1_HUMAN	MOXD1	DBH-like monooxygenase protein 1 OS=Homo sapiens OX=9606 GN=MOXD1 PE=1 SV=1	0.300125	6.28354	1.65323	0.107744	0.694823	-4.29302
sp|P07203|GPX1_HUMAN	GPX1	Glutathione peroxidase 1 OS=Homo sapiens OX=9606 GN=GPX1 PE=1 SV=4	0.222785	7.95331	1.68441	0.0993357	0.682642	-4.29643
sp|Q96GZ6|S41A3_HUMAN	SLC41A3	Solute carrier family 41 member 3 OS=Homo sapiens OX=9606 GN=SLC41A3 PE=1 SV=2	0.324393	7.49494	1.67615	0.101304	0.685944	-4.29846
sp|O95394|AGM1_HUMAN	PGM3	Phosphoacetylglucosamine mutase OS=Homo sapiens OX=9606 GN=PGM3 PE=1 SV=1	-0.211895	6.85103	-1.68226	0.0997553	0.682642	-4.29923
sp|Q9BW83|IFT27_HUMAN	IFT27	Intraflagellar transport protein 27 homolog OS=Homo sapiens OX=9606 GN=IFT27 PE=1 SV=1	-0.374164	6.46424	-1.63158	0.113936	0.705333	-4.30012
tr|A0A0A0MS29|A0A0A0MS29_HUMAN	MFF	Mitochondrial fission factor OS=Homo sapiens OX=9606 GN=MFF PE=1 SV=1	0.289645	6.97367	1.67791	0.100778	0.685944	-4.30039
sp|P62318|SMD3_HUMAN	SNRPD3	Small nuclear ribonucleoprotein Sm D3 OS=Homo sapiens OX=9606 GN=SNRPD3 PE=1 SV=1	-0.363492	7.3675	-1.67357	0.101634	0.685944	-4.30596
sp|Q9Y6G5|COMDA_HUMAN	COMMD10	COMM domain-containing protein 10 OS=Homo sapiens OX=9606 GN=COMMD10 PE=1 SV=1	-0.339171	6.14074	-1.63382	0.112387	0.70427	-4.30782
sp|Q96G23|CERS2_HUMAN	CERS2	Ceramide synthase 2 OS=Homo sapiens OX=9606 GN=CERS2 PE=1 SV=1	-0.236747	7.05428	-1.66144	0.104629	0.689285	-4.30842
sp|Q04206|TF65_HUMAN	RELA	Transcription factor p65 OS=Homo sapiens OX=9606 GN=RELA PE=1 SV=2	-0.169071	7.18069	-1.67088	0.102167	0.686484	-4.30941
sp|Q86Y39|NDUAB_HUMAN	NDUFA11	NADH dehydrogenase [ubiquinone] 1 alpha subcomplex subunit 11 OS=Homo sapiens OX=9606 GN=NDUFA11 PE=1 SV=3	0.432673	7.0907	1.67349	0.101478	0.685944	-4.31055
sp|Q13045|FLII_HUMAN	FLII	Protein flightless-1 homolog OS=Homo sapiens OX=9606 GN=FLII PE=1 SV=2	-0.150957	6.92819	-1.67286	0.101602	0.685944	-4.31137
sp|Q9H4A4|AMPB_HUMAN	RNPEP	Aminopeptidase B OS=Homo sapiens OX=9606 GN=RNPEP PE=1 SV=2	0.251831	7.19448	1.67229	0.101717	0.685944	-4.31211
sp|Q8N6N7|ACBD7_HUMAN	ACBD7	Acyl-CoA-binding domain-containing protein 7 OS=Homo sapiens OX=9606 GN=ACBD7 PE=1 SV=1	0.295154	7.95572	1.67211	0.101752	0.685944	-4.31234
sp|Q9HCJ6|VAT1L_HUMAN	VAT1L	Synaptic vesicle membrane protein VAT-1 homolog-like OS=Homo sapiens OX=9606 GN=VAT1L PE=1 SV=2	-0.188428	7.78699	-1.67047	0.102077	0.686484	-4.31445
sp|Q8IYB7|DI3L2_HUMAN	DIS3L2	DIS3-like exonuclease 2 OS=Homo sapiens OX=9606 GN=DIS3L2 PE=1 SV=4	0.409512	5.99211	1.60072	0.123652	0.711778	-4.31546
sp|P50990|TCPQ_HUMAN	CCT8	T-complex protein 1 subunit theta OS=Homo sapiens OX=9606 GN=CCT8 PE=1 SV=4	-0.111442	8.12889	-1.66788	0.102594	0.687182	-4.31779
sp|P46019|KPB2_HUMAN	PHKA2	Phosphorylase b kinase regulatory subunit alpha, liver isoform OS=Homo sapiens OX=9606 GN=PHKA2 PE=1 SV=1	0.200208	7.64299	1.65022	0.107123	0.693589	-4.31784
tr|A0A2R8Y566|A0A2R8Y566_HUMAN	RELCH	RAB11 binding and LisH domain, coiled-coil and HEAT repeat containing OS=Homo sapiens OX=9606 GN=RELCH PE=1 SV=1	-0.282967	7.90068	-1.65575	0.105582	0.689285	-4.31977
sp|O60936|NOL3_HUMAN	NOL3	Nucleolar protein 3 OS=Homo sapiens OX=9606 GN=NOL3 PE=1 SV=2	-0.218365	6.56564	-1.6554	0.105653	0.689285	-4.32021
sp|P52888|THOP1_HUMAN	THOP1	Thimet oligopeptidase OS=Homo sapiens OX=9606 GN=THOP1 PE=1 SV=2	0.213857	6.63889	1.66559	0.103052	0.688834	-4.32073
tr|A0A8I5KX57|A0A8I5KX57_HUMAN	BCAS1	Brain enriched myelin associated protein 1 OS=Homo sapiens OX=9606 GN=BCAS1 PE=1 SV=1	-0.256738	6.96978	-1.61761	0.115853	0.706682	-4.32109
sp|P21695|GPDA_HUMAN	GPD1	Glycerol-3-phosphate dehydrogenase [NAD(+)], cytoplasmic OS=Homo sapiens OX=9606 GN=GPD1 PE=1 SV=4	0.168859	7.299	1.6649	0.10319	0.688834	-4.32162
sp|P62701|RS4X_HUMAN	RPS4X	40S ribosomal protein S4, X isoform OS=Homo sapiens OX=9606 GN=RPS4X PE=1 SV=2	-0.171406	8.79315	-1.66245	0.103684	0.689285	-4.32476
sp|Q15286|RAB35_HUMAN	RAB35	Ras-related protein Rab-35 OS=Homo sapiens OX=9606 GN=RAB35 PE=1 SV=1	-0.173338	8.88674	-1.66186	0.103803	0.689285	-4.32552
sp|P84095|RHOG_HUMAN	RHOG	Rho-related GTP-binding protein RhoG OS=Homo sapiens OX=9606 GN=RHOG PE=1 SV=1	0.198339	9.04861	1.66046	0.104084	0.689285	-4.32731
sp|O00264|PGRC1_HUMAN	PGRMC1	Membrane-associated progesterone receptor component 1 OS=Homo sapiens OX=9606 GN=PGRMC1 PE=1 SV=3	-0.328749	8.4624	-1.65848	0.104485	0.689285	-4.32985
sp|P50135|HNMT_HUMAN	HNMT	Histamine N-methyltransferase OS=Homo sapiens OX=9606 GN=HNMT PE=1 SV=1	-0.210188	7.65435	-1.65739	0.104707	0.689285	-4.33124
sp|Q8TAF3|WDR48_HUMAN	WDR48	WD repeat-containing protein 48 OS=Homo sapiens OX=9606 GN=WDR48 PE=1 SV=1	0.12227	7.29205	1.65683	0.10482	0.689285	-4.33196
sp|O95881|TXD12_HUMAN	TXNDC12	Thioredoxin domain-containing protein 12 OS=Homo sapiens OX=9606 GN=TXNDC12 PE=1 SV=1	0.377919	6.61295	1.65627	0.104934	0.689285	-4.33267
sp|P00387|NB5R3_HUMAN	CYB5R3	NADH-cytochrome b5 reductase 3 OS=Homo sapiens OX=9606 GN=CYB5R3 PE=1 SV=3	-0.257689	9.13646	-1.65585	0.10502	0.689285	-4.33321
sp|P08865|RSSA_HUMAN	RPSA	40S ribosomal protein SA OS=Homo sapiens OX=9606 GN=RPSA PE=1 SV=4	-0.403676	8.72435	-1.65526	0.105141	0.689285	-4.33397
sp|P49795|RGS19_HUMAN	RGS19	Regulator of G-protein signaling 19 OS=Homo sapiens OX=9606 GN=RGS19 PE=1 SV=1	-0.401724	6.29096	-1.60522	0.118894	0.711278	-4.33525
sp|P48067|SC6A9_HUMAN	SLC6A9	Sodium- and chloride-dependent glycine transporter 1 OS=Homo sapiens OX=9606 GN=SLC6A9 PE=1 SV=3	0.212418	7.11865	1.63833	0.109381	0.694857	-4.33654
sp|Q9UHY1|NRBP_HUMAN	NRBP1	Nuclear receptor-binding protein OS=Homo sapiens OX=9606 GN=NRBP1 PE=1 SV=1	0.135127	7.45826	1.6532	0.10556	0.689285	-4.33659
sp|Q7Z2K8|GRIN1_HUMAN	GPRIN1	G protein-regulated inducer of neurite outgrowth 1 OS=Homo sapiens OX=9606 GN=GPRIN1 PE=1 SV=2	-0.218006	6.67073	-1.65211	0.105785	0.689285	-4.33799
sp|O14735|CDIPT_HUMAN	CDIPT	CDP-diacylglycerol--inositol 3-phosphatidyltransferase OS=Homo sapiens OX=9606 GN=CDIPT PE=1 SV=1	-0.229983	8.74733	-1.64796	0.106808	0.692647	-4.33857
sp|Q15005|SPCS2_HUMAN	SPCS2	Signal peptidase complex subunit 2 OS=Homo sapiens OX=9606 GN=SPCS2 PE=1 SV=3	-0.219522	8.18951	-1.6497	0.106279	0.691345	-4.34107
sp|Q5T440|CAF17_HUMAN	IBA57	Putative transferase CAF17, mitochondrial OS=Homo sapiens OX=9606 GN=IBA57 PE=1 SV=1	0.247222	7.02148	1.64892	0.106439	0.691345	-4.34205
sp|O75531|BAF_HUMAN	BANF1	Barrier-to-autointegration factor OS=Homo sapiens OX=9606 GN=BANF1 PE=1 SV=1	-0.233953	7.68802	-1.64286	0.107865	0.694823	-4.34502
sp|Q9NP97|DLRB1_HUMAN	DYNLRB1	Dynein light chain roadblock-type 1 OS=Homo sapiens OX=9606 GN=DYNLRB1 PE=1 SV=3	0.228651	7.60114	1.64125	0.108028	0.694823	-4.35181
sp|O00182|LEG9_HUMAN	LGALS9	Galectin-9 OS=Homo sapiens OX=9606 GN=LGALS9 PE=1 SV=2	0.227799	7.1693	1.64075	0.108132	0.694823	-4.35244
sp|O94776|MTA2_HUMAN	MTA2	Metastasis-associated protein MTA2 OS=Homo sapiens OX=9606 GN=MTA2 PE=1 SV=1	-0.324544	6.08853	-1.57856	0.126048	0.712418	-4.35379
sp|Q8N257|H2B3B_HUMAN	H2BC26	Histone H2B type 3-B OS=Homo sapiens OX=9606 GN=H2BC26 PE=1 SV=3	-0.420782	8.28164	-1.63733	0.108847	0.694823	-4.35678
sp|O75382|TRIM3_HUMAN	TRIM3	Tripartite motif-containing protein 3 OS=Homo sapiens OX=9606 GN=TRIM3 PE=1 SV=2	0.114753	7.11659	1.63672	0.108975	0.694823	-4.35754
sp|Q8N5M9|JAGN1_HUMAN	JAGN1	Protein jagunal homolog 1 OS=Homo sapiens OX=9606 GN=JAGN1 PE=1 SV=1	-0.263882	6.77059	-1.63635	0.109052	0.694823	-4.35801
sp|Q8NC96|NECP1_HUMAN	NECAP1	Adaptin ear-binding coat-associated protein 1 OS=Homo sapiens OX=9606 GN=NECAP1 PE=1 SV=2	0.167012	7.93026	1.63629	0.109065	0.694823	-4.35809
sp|P11215|ITAM_HUMAN	ITGAM	Integrin alpha-M OS=Homo sapiens OX=9606 GN=ITGAM PE=1 SV=2	-0.220692	7.94673	-1.63576	0.109177	0.694823	-4.35876
sp|P02747|C1QC_HUMAN	C1QC	Complement C1q subcomponent subunit C OS=Homo sapiens OX=9606 GN=C1QC PE=1 SV=3	-0.338228	7.91221	-1.63574	0.109182	0.694823	-4.35879
sp|O43866|CD5L_HUMAN	CD5L	CD5 antigen-like OS=Homo sapiens OX=9606 GN=CD5L PE=1 SV=1	-0.331721	7.16586	-1.61751	0.113814	0.705333	-4.36038
sp|Q8NFZ4|NLGN2_HUMAN	NLGN2	Neuroligin-2 OS=Homo sapiens OX=9606 GN=NLGN2 PE=1 SV=1	-0.26325	6.57865	-1.63335	0.109685	0.694857	-4.36181
tr|A0A1W2PNZ7|A0A1W2PNZ7_HUMAN	HLA-C	HLA class I histocompatibility antigen, C alpha chain OS=Homo sapiens OX=9606 GN=HLA-C PE=1 SV=1	-0.462175	6.8855	-1.56458	0.129735	0.713728	-4.36432
sp|Q9NPJ3|ACO13_HUMAN	ACOT13	Acyl-coenzyme A thioesterase 13 OS=Homo sapiens OX=9606 GN=ACOT13 PE=1 SV=1	0.381619	8.48825	1.61193	0.115026	0.706682	-4.36716
sp|P50995|ANX11_HUMAN	ANXA11	Annexin A11 OS=Homo sapiens OX=9606 GN=ANXA11 PE=1 SV=1	-0.228136	9.0403	-1.62882	0.110643	0.698628	-4.36752
sp|P48549|KCNJ3_HUMAN	KCNJ3	G protein-activated inward rectifier potassium channel 1 OS=Homo sapiens OX=9606 GN=KCNJ3 PE=1 SV=1	0.239696	7.89262	1.61699	0.113726	0.705333	-4.36787
sp|Q9Y4E8|UBP15_HUMAN	USP15	Ubiquitin carboxyl-terminal hydrolase 15 OS=Homo sapiens OX=9606 GN=USP15 PE=1 SV=3	-0.140918	6.65985	-1.62807	0.110804	0.698628	-4.36848
sp|Q16890|TPD53_HUMAN	TPD52L1	Tumor protein D53 OS=Homo sapiens OX=9606 GN=TPD52L1 PE=1 SV=1	-0.232075	7.64992	-1.56631	0.128479	0.713728	-4.36912
sp|Q9UEW8|STK39_HUMAN	STK39	STE20/SPS1-related proline-alanine-rich protein kinase OS=Homo sapiens OX=9606 GN=STK39 PE=1 SV=3	0.227355	7.74245	1.62409	0.111652	0.70078	-4.37348
sp|Q15366|PCBP2_HUMAN	PCBP2	Poly(rC)-binding protein 2 OS=Homo sapiens OX=9606 GN=PCBP2 PE=1 SV=1	0.117166	8.34039	1.62406	0.111659	0.70078	-4.37352
sp|Q03519|TAP2_HUMAN	TAP2	Antigen peptide transporter 2 OS=Homo sapiens OX=9606 GN=TAP2 PE=1 SV=1	-0.322693	8.56895	-1.5411	0.136895	0.726527	-4.37622
sp|Q9Y6M5|ZNT1_HUMAN	SLC30A1	Proton-coupled zinc antiporter SLC30A1 OS=Homo sapiens OX=9606 GN=SLC30A1 PE=1 SV=3	-0.196291	7.54747	-1.61878	0.112793	0.705333	-4.38014
sp|Q9BXM9|FSD1L_HUMAN	FSD1L	FSD1-like protein OS=Homo sapiens OX=9606 GN=FSD1L PE=1 SV=2	0.231317	7.26143	1.59378	0.119475	0.711631	-4.38101
sp|P62070|RRAS2_HUMAN	RRAS2	Ras-related protein R-Ras2 OS=Homo sapiens OX=9606 GN=RRAS2 PE=1 SV=1	-0.221943	6.65955	-1.61781	0.113004	0.705333	-4.38137
sp|Q9H270|VPS11_HUMAN	VPS11	Vacuolar protein sorting-associated protein 11 homolog OS=Homo sapiens OX=9606 GN=VPS11 PE=1 SV=1	-0.0965629	7.35241	-1.616	0.113394	0.705333	-4.38362
sp|Q9NX40|OCAD1_HUMAN	OCIAD1	OCIA domain-containing protein 1 OS=Homo sapiens OX=9606 GN=OCIAD1 PE=1 SV=1	-0.226326	7.62471	-1.61584	0.11343	0.705333	-4.38383
sp|P25098|ARBK1_HUMAN	GRK2	Beta-adrenergic receptor kinase 1 OS=Homo sapiens OX=9606 GN=GRK2 PE=1 SV=2	0.113063	7.1258	1.61406	0.113816	0.705333	-4.38605
sp|Q96KN2|CNDP1_HUMAN	CNDP1	Beta-Ala-His dipeptidase OS=Homo sapiens OX=9606 GN=CNDP1 PE=1 SV=5	0.286339	6.60718	1.59739	0.118234	0.711278	-4.38705
sp|O14521|DHSD_HUMAN	SDHD	Succinate dehydrogenase [ubiquinone] cytochrome b small subunit, mitochondrial OS=Homo sapiens OX=9606 GN=SDHD PE=1 SV=1	-0.262608	7.71439	-1.60824	0.11526	0.706682	-4.38831
sp|O75608|LYPA1_HUMAN	LYPLA1	Acyl-protein thioesterase 1 OS=Homo sapiens OX=9606 GN=LYPLA1 PE=1 SV=1	0.236714	8.11378	1.612	0.114264	0.706298	-4.38863
sp|O15162|PLS1_HUMAN	PLSCR1	Phospholipid scramblase 1 OS=Homo sapiens OX=9606 GN=PLSCR1 PE=1 SV=1	-0.323593	7.84156	-1.57254	0.125066	0.711778	-4.39158
sp|Q6IBS0|TWF2_HUMAN	TWF2	Twinfilin-2 OS=Homo sapiens OX=9606 GN=TWF2 PE=1 SV=2	0.325306	6.3325	1.5331	0.137771	0.726527	-4.39161
sp|Q7L523|RRAGA_HUMAN	RRAGA	Ras-related GTP-binding protein A OS=Homo sapiens OX=9606 GN=RRAGA PE=1 SV=1	0.141521	7.72187	1.60939	0.114836	0.706682	-4.39189
sp|Q8N8N7|PTGR2_HUMAN	PTGR2	Prostaglandin reductase 2 OS=Homo sapiens OX=9606 GN=PTGR2 PE=1 SV=1	-0.178336	7.23856	-1.60831	0.115072	0.706682	-4.39323
sp|Q9H299|SH3L3_HUMAN	SH3BGRL3	SH3 domain-binding glutamic acid-rich-like protein 3 OS=Homo sapiens OX=9606 GN=SH3BGRL3 PE=1 SV=1	-0.323383	9.0352	-1.60272	0.116477	0.709262	-4.39514
sp|P15056|BRAF_HUMAN	BRAF	Serine/threonine-protein kinase B-raf OS=Homo sapiens OX=9606 GN=BRAF PE=1 SV=4	-0.205465	7.36535	-1.60679	0.115408	0.706682	-4.39514
sp|Q32P44|EMAL3_HUMAN	EML3	Echinoderm microtubule-associated protein-like 3 OS=Homo sapiens OX=9606 GN=EML3 PE=1 SV=1	-0.312488	6.59956	-1.54421	0.133352	0.724669	-4.3957
sp|P13611|CSPG2_HUMAN	VCAN	Versican core protein OS=Homo sapiens OX=9606 GN=VCAN PE=1 SV=3	0.276366	9.08648	1.60492	0.115819	0.706682	-4.39746
sp|Q10589|BST2_HUMAN	BST2	Bone marrow stromal antigen 2 OS=Homo sapiens OX=9606 GN=BST2 PE=1 SV=1	-0.208812	10.5981	-1.60479	0.115848	0.706682	-4.39762
sp|Q02108|GCYA1_HUMAN	GUCY1A1	Guanylate cyclase soluble subunit alpha-1 OS=Homo sapiens OX=9606 GN=GUCY1A1 PE=1 SV=2	-0.160101	6.68062	-1.60464	0.115881	0.706682	-4.39781
sp|O15042|SR140_HUMAN	U2SURP	U2 snRNP-associated SURP motif-containing protein OS=Homo sapiens OX=9606 GN=U2SURP PE=1 SV=2	-0.336271	6.37054	-1.51778	0.142092	0.726527	-4.39794
sp|P98082|DAB2_HUMAN	DAB2	Disabled homolog 2 OS=Homo sapiens OX=9606 GN=DAB2 PE=1 SV=3	-0.282401	6.5142	-1.5684	0.125766	0.712418	-4.40144
sp|O14744|ANM5_HUMAN	PRMT5	Protein arginine N-methyltransferase 5 OS=Homo sapiens OX=9606 GN=PRMT5 PE=1 SV=4	-0.137609	6.86655	-1.60111	0.116661	0.709324	-4.40219
sp|P38435|VKGC_HUMAN	GGCX	Vitamin K-dependent gamma-carboxylase OS=Homo sapiens OX=9606 GN=GGCX PE=1 SV=2	-0.359785	6.66309	-1.49806	0.148279	0.73669	-4.4035
sp|Q86VB7|C163A_HUMAN	CD163	Scavenger receptor cysteine-rich type 1 protein M130 OS=Homo sapiens OX=9606 GN=CD163 PE=1 SV=2	-0.451305	8.49768	-1.59883	0.117168	0.711271	-4.40503
sp|Q15800|MSMO1_HUMAN	MSMO1	Methylsterol monooxygenase 1 OS=Homo sapiens OX=9606 GN=MSMO1 PE=1 SV=1	0.297395	7.14381	1.58115	0.121904	0.711778	-4.40657
sp|Q9UKY4|POMT2_HUMAN	POMT2	Protein O-mannosyl-transferase 2 OS=Homo sapiens OX=9606 GN=POMT2 PE=1 SV=2	-0.455868	8.0457	-1.51783	0.141088	0.726527	-4.40669
sp|P61923|COPZ1_HUMAN	COPZ1	Coatomer subunit zeta-1 OS=Homo sapiens OX=9606 GN=COPZ1 PE=1 SV=1	0.207468	7.36265	1.59221	0.118823	0.711278	-4.40808
sp|Q14257|RCN2_HUMAN	RCN2	Reticulocalbin-2 OS=Homo sapiens OX=9606 GN=RCN2 PE=1 SV=1	-0.204599	7.93229	-1.59619	0.117756	0.711271	-4.40829
sp|O60684|IMA7_HUMAN	KPNA6	Importin subunit alpha-7 OS=Homo sapiens OX=9606 GN=KPNA6 PE=1 SV=1	0.153532	7.05306	1.59601	0.117797	0.711271	-4.40852
sp|Q15018|ABRX2_HUMAN	ABRAXAS2	BRISC complex subunit Abraxas 2 OS=Homo sapiens OX=9606 GN=ABRAXAS2 PE=1 SV=2	-0.144115	6.80766	-1.59565	0.117878	0.711271	-4.40896
tr|E5RFP6|E5RFP6_HUMAN	VDAC3	Voltage dependent anion channel 3 OS=Homo sapiens OX=9606 GN=VDAC3 PE=1 SV=1	0.405117	8.69282	1.59554	0.117903	0.711271	-4.40911
sp|P46459|NSF_HUMAN	NSF	Vesicle-fusing ATPase OS=Homo sapiens OX=9606 GN=NSF PE=1 SV=3	0.143069	9.44539	1.595	0.118024	0.711271	-4.40977
sp|Q6YHK3|CD109_HUMAN	CD109	CD109 antigen OS=Homo sapiens OX=9606 GN=CD109 PE=1 SV=2	0.295442	6.37387	1.53117	0.135845	0.726527	-4.41041
sp|Q12797|ASPH_HUMAN	ASPH	Aspartyl/asparaginyl beta-hydroxylase OS=Homo sapiens OX=9606 GN=ASPH PE=1 SV=3	0.195252	6.8257	1.58989	0.119345	0.711631	-4.41093
sp|Q9NQX3|GEPH_HUMAN	GPHN	Gephyrin OS=Homo sapiens OX=9606 GN=GPHN PE=1 SV=1	0.154413	6.90586	1.5934	0.118382	0.711278	-4.41175
sp|Q8WW22|DNJA4_HUMAN	DNAJA4	DnaJ homolog subfamily A member 4 OS=Homo sapiens OX=9606 GN=DNAJA4 PE=1 SV=1	-0.148311	6.89166	-1.59258	0.118566	0.711278	-4.41276
sp|Q4G0X4|KCD21_HUMAN	KCTD21	BTB/POZ domain-containing protein KCTD21 OS=Homo sapiens OX=9606 GN=KCTD21 PE=1 SV=1	-0.235912	6.62938	-1.55488	0.128952	0.713728	-4.41422
sp|P10451|OSTP_HUMAN	SPP1	Osteopontin OS=Homo sapiens OX=9606 GN=SPP1 PE=1 SV=1	0.315664	6.17579	1.53568	0.134736	0.726527	-4.41478
sp|Q53TN4|CYBR1_HUMAN	CYBRD1	Plasma membrane ascorbate-dependent reductase CYBRD1 OS=Homo sapiens OX=9606 GN=CYBRD1 PE=1 SV=1	-0.427705	7.91035	-1.58911	0.119349	0.711631	-4.41705
sp|Q9UHA4|LTOR3_HUMAN	LAMTOR3	Ragulator complex protein LAMTOR3 OS=Homo sapiens OX=9606 GN=LAMTOR3 PE=1 SV=1	0.491569	7.23783	1.58041	0.121684	0.711778	-4.41759
sp|O95858|TSN15_HUMAN	TSPAN15	Tetraspanin-15 OS=Homo sapiens OX=9606 GN=TSPAN15 PE=1 SV=1	0.314073	7.54641	1.5711	0.124222	0.711778	-4.41797
sp|Q9BQ70|TCF25_HUMAN	TCF25	Transcription factor 25 OS=Homo sapiens OX=9606 GN=TCF25 PE=1 SV=1	-0.224156	6.5582	-1.57498	0.123124	0.711778	-4.41891
sp|Q13480|GAB1_HUMAN	GAB1	GRB2-associated-binding protein 1 OS=Homo sapiens OX=9606 GN=GAB1 PE=1 SV=2	0.198957	7.47943	1.54692	0.130858	0.715469	-4.42327
sp|P36021|MOT8_HUMAN	SLC16A2	Monocarboxylate transporter 8 OS=Homo sapiens OX=9606 GN=SLC16A2 PE=1 SV=2	-0.246033	7.7659	-1.57826	0.121995	0.711778	-4.42516
sp|P40926|MDHM_HUMAN	MDH2	Malate dehydrogenase, mitochondrial OS=Homo sapiens OX=9606 GN=MDH2 PE=1 SV=3	0.308826	8.97328	1.58221	0.120918	0.711778	-4.42555
sp|O95372|LYPA2_HUMAN	LYPLA2	Acyl-protein thioesterase 2 OS=Homo sapiens OX=9606 GN=LYPLA2 PE=1 SV=1	-0.134577	7.27878	-1.58202	0.12096	0.711778	-4.42578
sp|P41250|GARS_HUMAN	GARS1	Glycine--tRNA ligase OS=Homo sapiens OX=9606 GN=GARS1 PE=1 SV=3	-0.137755	7.67784	-1.582	0.120966	0.711778	-4.42581
sp|Q9UIQ6|LCAP_HUMAN	LNPEP	Leucyl-cystinyl aminopeptidase OS=Homo sapiens OX=9606 GN=LNPEP PE=1 SV=3	-0.15009	7.20352	-1.58161	0.121054	0.711778	-4.42629
sp|O95219|SNX4_HUMAN	SNX4	Sorting nexin-4 OS=Homo sapiens OX=9606 GN=SNX4 PE=1 SV=1	0.120801	7.42603	1.57949	0.121539	0.711778	-4.42889
sp|P59998|ARPC4_HUMAN	ARPC4	Actin-related protein 2/3 complex subunit 4 OS=Homo sapiens OX=9606 GN=ARPC4 PE=1 SV=3	0.142057	9.72942	1.57929	0.121584	0.711778	-4.42913
sp|Q9UGV2|NDRG3_HUMAN	NDRG3	Protein NDRG3 OS=Homo sapiens OX=9606 GN=NDRG3 PE=1 SV=2	0.167295	8.82768	1.57898	0.121656	0.711778	-4.42951
sp|P41586|PACR_HUMAN	ADCYAP1R1	Pituitary adenylate cyclase-activating polypeptide type I receptor OS=Homo sapiens OX=9606 GN=ADCYAP1R1 PE=1 SV=1	-0.254782	7.69859	-1.57407	0.12296	0.711778	-4.43025
sp|O43761|SNG3_HUMAN	SYNGR3	Synaptogyrin-3 OS=Homo sapiens OX=9606 GN=SYNGR3 PE=1 SV=2	-0.371617	11.6555	-1.57775	0.121939	0.711778	-4.43102
sp|Q9NZJ7|MTCH1_HUMAN	MTCH1	Mitochondrial carrier homolog 1 OS=Homo sapiens OX=9606 GN=MTCH1 PE=1 SV=1	-0.249587	7.62393	-1.57613	0.122312	0.711778	-4.43301
sp|Q96FN4|CPNE2_HUMAN	CPNE2	Copine-2 OS=Homo sapiens OX=9606 GN=CPNE2 PE=1 SV=3	-0.145299	6.83279	-1.57607	0.122326	0.711778	-4.43308
sp|Q7LG56|RIR2B_HUMAN	RRM2B	Ribonucleoside-diphosphate reductase subunit M2 B OS=Homo sapiens OX=9606 GN=RRM2B PE=1 SV=1	0.191433	8.27978	1.57603	0.122335	0.711778	-4.43313
sp|Q9HDC9|APMAP_HUMAN	APMAP	Adipocyte plasma membrane-associated protein OS=Homo sapiens OX=9606 GN=APMAP PE=1 SV=2	-0.178921	8.25924	-1.57572	0.122406	0.711778	-4.43351
sp|P55735|SEC13_HUMAN	SEC13	Protein SEC13 homolog OS=Homo sapiens OX=9606 GN=SEC13 PE=1 SV=3	0.226282	7.38213	1.57561	0.122433	0.711778	-4.43365
sp|P11047|LAMC1_HUMAN	LAMC1	Laminin subunit gamma-1 OS=Homo sapiens OX=9606 GN=LAMC1 PE=1 SV=3	-0.18936	7.10186	-1.57203	0.12326	0.711778	-4.43802
sp|P47985|UCRI_HUMAN	UQCRFS1	Cytochrome b-c1 complex subunit Rieske, mitochondrial OS=Homo sapiens OX=9606 GN=UQCRFS1 PE=1 SV=2	-0.232202	10.1554	-1.57136	0.123416	0.711778	-4.43885
sp|P18206|VINC_HUMAN	VCL	Vinculin OS=Homo sapiens OX=9606 GN=VCL PE=1 SV=4	-0.183308	7.65022	-1.57065	0.123581	0.711778	-4.43971
sp|Q96CN7|ISOC1_HUMAN	ISOC1	Isochorismatase domain-containing protein 1 OS=Homo sapiens OX=9606 GN=ISOC1 PE=1 SV=3	0.199513	7.46014	1.56556	0.124942	0.711778	-4.44058
sp|P62249|RS16_HUMAN	RPS16	40S ribosomal protein S16 OS=Homo sapiens OX=9606 GN=RPS16 PE=1 SV=2	-0.277049	9.80656	-1.56983	0.123772	0.711778	-4.44072
sp|Q9H9P8|L2HDH_HUMAN	L2HGDH	L-2-hydroxyglutarate dehydrogenase, mitochondrial OS=Homo sapiens OX=9606 GN=L2HGDH PE=1 SV=3	0.194705	6.93601	1.56838	0.124108	0.711778	-4.44248
sp|Q08828|ADCY1_HUMAN	ADCY1	Adenylate cyclase type 1 OS=Homo sapiens OX=9606 GN=ADCY1 PE=1 SV=2	0.315973	6.57329	1.50138	0.144039	0.729967	-4.44314
sp|O75380|NDUS6_HUMAN	NDUFS6	NADH dehydrogenase [ubiquinone] iron-sulfur protein 6, mitochondrial OS=Homo sapiens OX=9606 GN=NDUFS6 PE=1 SV=1	-0.27539	9.74704	-1.56686	0.124466	0.711778	-4.44434
sp|Q16773|KAT1_HUMAN	KYAT1	Kynurenine--oxoglutarate transaminase 1 OS=Homo sapiens OX=9606 GN=KYAT1 PE=1 SV=1	0.333171	8.07234	1.56683	0.124471	0.711778	-4.44437
sp|Q92692|NECT2_HUMAN	NECTIN2	Nectin-2 OS=Homo sapiens OX=9606 GN=NECTIN2 PE=1 SV=1	-0.187255	7.56762	-1.56128	0.125949	0.712418	-4.44576
sp|Q8WXG6|MADD_HUMAN	MADD	MAP kinase-activating death domain protein OS=Homo sapiens OX=9606 GN=MADD PE=1 SV=2	0.171677	7.10066	1.56544	0.124798	0.711778	-4.44607
sp|P62166|NCS1_HUMAN	NCS1	Neuronal calcium sensor 1 OS=Homo sapiens OX=9606 GN=NCS1 PE=1 SV=2	0.13718	9.31174	1.56516	0.124862	0.711778	-4.4464
sp|P11142|HSP7C_HUMAN	HSPA8	Heat shock cognate 71 kDa protein OS=Homo sapiens OX=9606 GN=HSPA8 PE=1 SV=1	0.192328	10.0664	1.56504	0.124891	0.711778	-4.44655
sp|Q07866|KLC1_HUMAN	KLC1	Kinesin light chain 1 OS=Homo sapiens OX=9606 GN=KLC1 PE=1 SV=2	-0.0917799	7.52055	-1.56316	0.125333	0.712311	-4.44885
sp|Q9H0R4|HDHD2_HUMAN	HDHD2	Haloacid dehalogenase-like hydrolase domain-containing protein 2 OS=Homo sapiens OX=9606 GN=HDHD2 PE=1 SV=1	0.222326	7.01428	1.56177	0.125659	0.712418	-4.45053
sp|O00519|FAAH1_HUMAN	FAAH	Fatty-acid amide hydrolase 1 OS=Homo sapiens OX=9606 GN=FAAH PE=1 SV=2	-0.174849	7.04208	-1.54688	0.129754	0.713728	-4.4524
sp|Q9P0J1|PDP1_HUMAN	PDP1	[Pyruvate dehydrogenase [acetyl-transferring]]-phosphatase 1, mitochondrial OS=Homo sapiens OX=9606 GN=PDP1 PE=1 SV=3	0.434466	7.31062	1.4694	0.153686	0.740981	-4.45414
sp|P68400|CSK21_HUMAN	CSNK2A1	Casein kinase II subunit alpha OS=Homo sapiens OX=9606 GN=CSNK2A1 PE=1 SV=1	0.137592	7.10244	1.55764	0.126635	0.713728	-4.45554
sp|Q5T447|HECD3_HUMAN	HECTD3	E3 ubiquitin-protein ligase HECTD3 OS=Homo sapiens OX=9606 GN=HECTD3 PE=1 SV=1	0.170489	7.06414	1.55686	0.12682	0.713728	-4.45648
sp|Q9Y2B0|CNPY2_HUMAN	CNPY2	Protein canopy homolog 2 OS=Homo sapiens OX=9606 GN=CNPY2 PE=1 SV=1	-0.191505	7.2327	-1.55646	0.126915	0.713728	-4.45697
sp|Q9UKF7|PITC1_HUMAN	PITPNC1	Cytoplasmic phosphatidylinositol transfer protein 1 OS=Homo sapiens OX=9606 GN=PITPNC1 PE=1 SV=3	-0.164826	7.37473	-1.55497	0.127269	0.713728	-4.45878
sp|O43592|XPOT_HUMAN	XPOT	Exportin-T OS=Homo sapiens OX=9606 GN=XPOT PE=1 SV=2	0.27152	7.06991	1.51748	0.138107	0.726527	-4.45926
sp|P30084|ECHM_HUMAN	ECHS1	Enoyl-CoA hydratase, mitochondrial OS=Homo sapiens OX=9606 GN=ECHS1 PE=1 SV=4	0.220329	7.60189	1.55438	0.127412	0.713728	-4.4595
sp|Q8NCG7|DGLB_HUMAN	DAGLB	Diacylglycerol lipase-beta OS=Homo sapiens OX=9606 GN=DAGLB PE=1 SV=2	-0.181264	7.18299	-1.55407	0.127484	0.713728	-4.45987
sp|Q8NB37|GALD1_HUMAN	GATD1	Glutamine amidotransferase-like class 1 domain-containing protein 1 OS=Homo sapiens OX=9606 GN=GATD1 PE=1 SV=1	0.148251	7.09732	1.55363	0.12759	0.713728	-4.4604
sp|Q7LDG7|GRP2_HUMAN	RASGRP2	RAS guanyl-releasing protein 2 OS=Homo sapiens OX=9606 GN=RASGRP2 PE=1 SV=1	-0.245822	5.98338	-1.48687	0.147126	0.735991	-4.46264
sp|Q9P253|VPS18_HUMAN	VPS18	Vacuolar protein sorting-associated protein 18 homolog OS=Homo sapiens OX=9606 GN=VPS18 PE=1 SV=2	-0.120812	7.20027	-1.55021	0.128408	0.713728	-4.46454
sp|P60484|PTEN_HUMAN	PTEN	Phosphatidylinositol 3,4,5-trisphosphate 3-phosphatase and dual-specificity protein phosphatase PTEN OS=Homo sapiens OX=9606 GN=PTEN PE=1 SV=1	0.223034	6.73461	1.49519	0.144639	0.729967	-4.46682
sp|P61313|RL15_HUMAN	RPL15	60S ribosomal protein L15 OS=Homo sapiens OX=9606 GN=RPL15 PE=1 SV=2	-0.124532	7.94787	-1.54829	0.12887	0.713728	-4.46686
sp|Q15257|PTPA_HUMAN	PTPA	Serine/threonine-protein phosphatase 2A activator OS=Homo sapiens OX=9606 GN=PTPA PE=1 SV=3	0.16575	8.42679	1.54813	0.128907	0.713728	-4.46704
sp|O95721|SNP29_HUMAN	SNAP29	Synaptosomal-associated protein 29 OS=Homo sapiens OX=9606 GN=SNAP29 PE=1 SV=1	-0.165836	7.6458	-1.54722	0.129126	0.713728	-4.46814
sp|P01019|ANGT_HUMAN	AGT	Angiotensinogen OS=Homo sapiens OX=9606 GN=AGT PE=1 SV=3	0.289311	6.99393	1.54669	0.129254	0.713728	-4.46878
sp|P05556|ITB1_HUMAN	ITGB1	Integrin beta-1 OS=Homo sapiens OX=9606 GN=ITGB1 PE=1 SV=2	-0.211639	8.76632	-1.5465	0.129299	0.713728	-4.46901
sp|Q9BRK0|REEP2_HUMAN	REEP2	Receptor expression-enhancing protein 2 OS=Homo sapiens OX=9606 GN=REEP2 PE=1 SV=2	-0.23763	8.19321	-1.47553	0.150816	0.740862	-4.46984
sp|P62760|VISL1_HUMAN	VSNL1	Visinin-like protein 1 OS=Homo sapiens OX=9606 GN=VSNL1 PE=1 SV=2	0.134407	10.5147	1.54556	0.129525	0.713728	-4.47014
sp|P00846|ATP6_HUMAN	MT-ATP6	ATP synthase subunit a OS=Homo sapiens OX=9606 GN=MT-ATP6 PE=1 SV=1	0.296803	7.91695	1.54545	0.129553	0.713728	-4.47028
sp|Q9NYB9|ABI2_HUMAN	ABI2	Abl interactor 2 OS=Homo sapiens OX=9606 GN=ABI2 PE=1 SV=1	0.193243	8.60103	1.54456	0.129769	0.713728	-4.47135
sp|P61769|B2MG_HUMAN	B2M	Beta-2-microglobulin OS=Homo sapiens OX=9606 GN=B2M PE=1 SV=1	-0.190511	11.7072	-1.54351	0.130022	0.714164	-4.47261
sp|P04350|TBB4A_HUMAN	TUBB4A	Tubulin beta-4A chain OS=Homo sapiens OX=9606 GN=TUBB4A PE=1 SV=2	0.183776	11.9487	1.54154	0.1305	0.715469	-4.47498
sp|Q13011|ECH1_HUMAN	ECH1	Delta(3,5)-Delta(2,4)-dienoyl-CoA isomerase, mitochondrial OS=Homo sapiens OX=9606 GN=ECH1 PE=1 SV=2	0.182088	7.45416	1.54061	0.130727	0.715469	-4.4761
sp|P00395|COX1_HUMAN	MT-CO1	Cytochrome c oxidase subunit 1 OS=Homo sapiens OX=9606 GN=MT-CO1 PE=1 SV=1	-0.264967	8.47956	-1.53965	0.130959	0.715469	-4.47725
sp|Q13576|IQGA2_HUMAN	IQGAP2	Ras GTPase-activating-like protein IQGAP2 OS=Homo sapiens OX=9606 GN=IQGAP2 PE=1 SV=4	-0.270138	6.4444	-1.52884	0.133968	0.725128	-4.47865
tr|Q5JXI8|Q5JXI8_HUMAN	FHL1	Four and a half LIM domains 1 (Fragment) OS=Homo sapiens OX=9606 GN=FHL1 PE=1 SV=1	-0.432429	9.0773	-1.52901	0.133927	0.725128	-4.47905
sp|Q92562|FIG4_HUMAN	FIG4	Polyphosphoinositide phosphatase OS=Homo sapiens OX=9606 GN=FIG4 PE=1 SV=1	-0.24121	7.61063	-1.45493	0.157183	0.740981	-4.47913
sp|Q8WWI1|LMO7_HUMAN	LMO7	LIM domain only protein 7 OS=Homo sapiens OX=9606 GN=LMO7 PE=1 SV=3	0.186824	7.65725	1.50689	0.140311	0.726527	-4.48235
sp|Q96I51|RCC1L_HUMAN	RCC1L	RCC1-like G exchanging factor-like protein OS=Homo sapiens OX=9606 GN=RCC1L PE=1 SV=3	0.40651	6.08815	1.45107	0.158247	0.740981	-4.48294
sp|Q04760|LGUL_HUMAN	GLO1	Lactoylglutathione lyase OS=Homo sapiens OX=9606 GN=GLO1 PE=1 SV=4	0.251735	8.3271	1.53443	0.132235	0.721477	-4.4835
sp|Q93100|KPBB_HUMAN	PHKB	Phosphorylase b kinase regulatory subunit beta OS=Homo sapiens OX=9606 GN=PHKB PE=1 SV=3	-0.136293	7.27819	-1.53358	0.132446	0.721663	-4.48453
sp|O95136|S1PR2_HUMAN	S1PR2	Sphingosine 1-phosphate receptor 2 OS=Homo sapiens OX=9606 GN=S1PR2 PE=1 SV=2	-0.397123	6.00567	-1.50889	0.139581	0.726527	-4.48556
sp|P20036|DPA1_HUMAN	HLA-DPA1	HLA class II histocompatibility antigen, DP alpha 1 chain OS=Homo sapiens OX=9606 GN=HLA-DPA1 PE=1 SV=1	-0.335628	8.0984	-1.53249	0.132714	0.722162	-4.48583
sp|O94811|TPPP_HUMAN	TPPP	Tubulin polymerization-promoting protein OS=Homo sapiens OX=9606 GN=TPPP PE=1 SV=1	-0.201305	9.84629	-1.52868	0.133653	0.725128	-4.49037
sp|Q9NNX6|CD209_HUMAN	CD209	CD209 antigen OS=Homo sapiens OX=9606 GN=CD209 PE=1 SV=1	-0.369049	7.50808	-1.51372	0.137943	0.726527	-4.49124
sp|O75787|RENR_HUMAN	ATP6AP2	Renin receptor OS=Homo sapiens OX=9606 GN=ATP6AP2 PE=1 SV=2	-0.245667	8.71469	-1.52505	0.134556	0.726527	-4.49471
sp|Q8IV08|PLD3_HUMAN	PLD3	5'-3' exonuclease PLD3 OS=Homo sapiens OX=9606 GN=PLD3 PE=1 SV=1	-0.14183	8.12654	-1.52407	0.1348	0.726527	-4.49587
sp|O95816|BAG2_HUMAN	BAG2	BAG family molecular chaperone regulator 2 OS=Homo sapiens OX=9606 GN=BAG2 PE=1 SV=1	0.168671	7.03602	1.49323	0.143838	0.729967	-4.49704
sp|Q7Z3J2|VP35L_HUMAN	VPS35L	VPS35 endosomal protein-sorting factor-like OS=Homo sapiens OX=9606 GN=VPS35L PE=1 SV=2	0.164538	6.77893	1.52289	0.135093	0.726527	-4.49727
sp|P58546|MTPN_HUMAN	MTPN	Myotrophin OS=Homo sapiens OX=9606 GN=MTPN PE=1 SV=2	0.182343	8.01339	1.52075	0.135628	0.726527	-4.49981
sp|Q9H6Z4|RANB3_HUMAN	RANBP3	Ran-binding protein 3 OS=Homo sapiens OX=9606 GN=RANBP3 PE=1 SV=1	0.278711	5.79331	1.45124	0.157062	0.740981	-4.50129
sp|P06132|DCUP_HUMAN	UROD	Uroporphyrinogen decarboxylase OS=Homo sapiens OX=9606 GN=UROD PE=1 SV=2	0.201842	7.30004	1.41795	0.168512	0.744658	-4.50287
sp|P48047|ATPO_HUMAN	ATP5PO	ATP synthase subunit O, mitochondrial OS=Homo sapiens OX=9606 GN=ATP5PO PE=1 SV=1	-0.278502	9.67264	-1.51803	0.136313	0.726527	-4.50304
sp|Q9Y296|TPPC4_HUMAN	TRAPPC4	Trafficking protein particle complex subunit 4 OS=Homo sapiens OX=9606 GN=TRAPPC4 PE=1 SV=1	-0.312055	6.55926	-1.41722	0.168724	0.744786	-4.50356
sp|Q5KU26|COL12_HUMAN	COLEC12	Collectin-12 OS=Homo sapiens OX=9606 GN=COLEC12 PE=1 SV=3	-0.243083	7.76102	-1.51703	0.136563	0.726527	-4.50422
sp|P62750|RL23A_HUMAN	RPL23A	60S ribosomal protein L23a OS=Homo sapiens OX=9606 GN=RPL23A PE=1 SV=1	-0.157477	7.93365	-1.51675	0.136636	0.726527	-4.50456
sp|P08962|CD63_HUMAN	CD63	CD63 antigen OS=Homo sapiens OX=9606 GN=CD63 PE=1 SV=2	-0.164778	7.88004	-1.51639	0.136726	0.726527	-4.50499
sp|O15068|MCF2L_HUMAN	MCF2L	Guanine nucleotide exchange factor DBS OS=Homo sapiens OX=9606 GN=MCF2L PE=1 SV=2	0.20593	6.61893	1.50104	0.141182	0.726527	-4.5059
tr|A0A8I5KXV5|A0A8I5KXV5_HUMAN	DNM3	dynamin GTPase OS=Homo sapiens OX=9606 GN=DNM3 PE=1 SV=1	-0.225137	10.0176	-1.50939	0.138671	0.726527	-4.5075
sp|O43617|TPPC3_HUMAN	TRAPPC3	Trafficking protein particle complex subunit 3 OS=Homo sapiens OX=9606 GN=TRAPPC3 PE=1 SV=1	-0.239081	8.35207	-1.50925	0.138709	0.726527	-4.50768
sp|Q96BM9|ARL8A_HUMAN	ARL8A	ADP-ribosylation factor-like protein 8A OS=Homo sapiens OX=9606 GN=ARL8A PE=1 SV=1	-0.376631	8.94874	-1.4924	0.143623	0.729967	-4.50956
sp|Q5XKL5|BTBD8_HUMAN	BTBD8	BTB/POZ domain-containing protein 8 OS=Homo sapiens OX=9606 GN=BTBD8 PE=1 SV=3	-0.242356	6.20291	-1.43076	0.163534	0.740981	-4.50972
sp|Q9H845|ACAD9_HUMAN	ACAD9	Complex I assembly factor ACAD9, mitochondrial OS=Homo sapiens OX=9606 GN=ACAD9 PE=1 SV=1	-0.137236	7.32276	-1.51187	0.13787	0.726527	-4.51033
sp|P23763|VAMP1_HUMAN	VAMP1	Vesicle-associated membrane protein 1 OS=Homo sapiens OX=9606 GN=VAMP1 PE=1 SV=1	0.355287	7.50487	1.51185	0.137875	0.726527	-4.51036
sp|Q09666|AHNK_HUMAN	AHNAK	Neuroblast differentiation-associated protein AHNAK OS=Homo sapiens OX=9606 GN=AHNAK PE=1 SV=2	-0.254472	7.48906	-1.50977	0.138403	0.726527	-4.51281
sp|P23515|OMGP_HUMAN	OMG	Oligodendrocyte-myelin glycoprotein OS=Homo sapiens OX=9606 GN=OMG PE=1 SV=2	0.223474	8.59069	1.5096	0.138445	0.726527	-4.51301
sp|P55001|MFAP2_HUMAN	MFAP2	Microfibrillar-associated protein 2 OS=Homo sapiens OX=9606 GN=MFAP2 PE=1 SV=1	-0.25206	6.85221	-1.49922	0.141463	0.726527	-4.51324
sp|Q9UNQ0|ABCG2_HUMAN	ABCG2	Broad substrate specificity ATP-binding cassette transporter ABCG2 OS=Homo sapiens OX=9606 GN=ABCG2 PE=1 SV=3	-0.205751	7.96002	-1.50878	0.138654	0.726527	-4.51397
sp|P12821|ACE_HUMAN	ACE	Angiotensin-converting enzyme OS=Homo sapiens OX=9606 GN=ACE PE=1 SV=1	-0.180392	7.18334	-1.5079	0.138878	0.726527	-4.51501
sp|Q13630|FCL_HUMAN	GFUS	GDP-L-fucose synthase OS=Homo sapiens OX=9606 GN=GFUS PE=1 SV=1	-0.262303	7.23405	-1.49821	0.141723	0.726527	-4.51503
sp|P52788|SPSY_HUMAN	SMS	Spermine synthase OS=Homo sapiens OX=9606 GN=SMS PE=1 SV=2	0.331977	7.20086	1.43545	0.161476	0.740981	-4.5155
sp|Q14332|FZD2_HUMAN	FZD2	Frizzled-2 OS=Homo sapiens OX=9606 GN=FZD2 PE=1 SV=1	-0.314743	7.5022	-1.42271	0.165836	0.741779	-4.51559
sp|P43405|KSYK_HUMAN	SYK	Tyrosine-protein kinase SYK OS=Homo sapiens OX=9606 GN=SYK PE=1 SV=1	-0.184929	7.03597	-1.50698	0.139114	0.726527	-4.51609
sp|Q8N163|CCAR2_HUMAN	CCAR2	Cell cycle and apoptosis regulator protein 2 OS=Homo sapiens OX=9606 GN=CCAR2 PE=1 SV=2	0.263759	6.81576	1.46978	0.150289	0.740336	-4.51624
sp|O94967|WDR47_HUMAN	WDR47	WD repeat-containing protein 47 OS=Homo sapiens OX=9606 GN=WDR47 PE=1 SV=1	0.130095	7.20555	1.50681	0.139159	0.726527	-4.5163
sp|O00461|GOLI4_HUMAN	GOLIM4	Golgi integral membrane protein 4 OS=Homo sapiens OX=9606 GN=GOLIM4 PE=1 SV=1	-0.164434	7.17946	-1.50619	0.139315	0.726527	-4.51702
sp|P09669|COX6C_HUMAN	COX6C	Cytochrome c oxidase subunit 6C OS=Homo sapiens OX=9606 GN=COX6C PE=1 SV=2	-0.218296	9.47935	-1.5038	0.13993	0.726527	-4.51984
sp|Q15819|UB2V2_HUMAN	UBE2V2	Ubiquitin-conjugating enzyme E2 variant 2 OS=Homo sapiens OX=9606 GN=UBE2V2 PE=1 SV=4	0.195632	8.06783	1.50316	0.140094	0.726527	-4.5206
sp|Q8NFZ8|CADM4_HUMAN	CADM4	Cell adhesion molecule 4 OS=Homo sapiens OX=9606 GN=CADM4 PE=1 SV=1	0.157569	8.66598	1.50163	0.140487	0.726527	-4.52239
sp|Q9Y3I0|RTCB_HUMAN	RTCB	RNA-splicing ligase RtcB homolog OS=Homo sapiens OX=9606 GN=RTCB PE=1 SV=1	0.108686	7.55174	1.50159	0.140497	0.726527	-4.52243
sp|Q8WUY1|THEM6_HUMAN	THEM6	Protein THEM6 OS=Homo sapiens OX=9606 GN=THEM6 PE=1 SV=2	-0.174998	7.1516	-1.49588	0.142148	0.726527	-4.52329
sp|P0DJI8|SAA1_HUMAN	SAA1	Serum amyloid A-1 protein OS=Homo sapiens OX=9606 GN=SAA1 PE=1 SV=1	-0.528418	7.19469	-1.40815	0.170463	0.747627	-4.52467
sp|P20851|C4BPB_HUMAN	C4BPB	C4b-binding protein beta chain OS=Homo sapiens OX=9606 GN=C4BPB PE=1 SV=1	-0.378079	7.23002	-1.48985	0.143902	0.729967	-4.52468
sp|O00303|EIF3F_HUMAN	EIF3F	Eukaryotic translation initiation factor 3 subunit F OS=Homo sapiens OX=9606 GN=EIF3F PE=1 SV=1	0.115402	7.28227	1.49859	0.141272	0.726527	-4.52595
sp|Q6PI78|TMM65_HUMAN	TMEM65	Transmembrane protein 65 OS=Homo sapiens OX=9606 GN=TMEM65 PE=1 SV=2	-0.206874	7.92716	-1.49818	0.141379	0.726527	-4.52644
sp|Q9UQ80|PA2G4_HUMAN	PA2G4	Proliferation-associated protein 2G4 OS=Homo sapiens OX=9606 GN=PA2G4 PE=1 SV=3	0.162836	7.37585	1.49789	0.141454	0.726527	-4.52678
sp|Q14139|UBE4A_HUMAN	UBE4A	Ubiquitin conjugation factor E4 A OS=Homo sapiens OX=9606 GN=UBE4A PE=1 SV=2	0.155156	7.04097	1.497	0.141686	0.726527	-4.52782
sp|O60939|SCN2B_HUMAN	SCN2B	Sodium channel subunit beta-2 OS=Homo sapiens OX=9606 GN=SCN2B PE=1 SV=1	0.181116	8.5414	1.49663	0.141781	0.726527	-4.52825
sp|P04632|CPNS1_HUMAN	CAPNS1	Calpain small subunit 1 OS=Homo sapiens OX=9606 GN=CAPNS1 PE=1 SV=1	-0.151428	8.32162	-1.49565	0.142036	0.726527	-4.5294
sp|Q8IY17|PLPL6_HUMAN	PNPLA6	Patatin-like phospholipase domain-containing protein 6 OS=Homo sapiens OX=9606 GN=PNPLA6 PE=1 SV=3	-0.170156	6.9801	-1.49538	0.142107	0.726527	-4.52972
sp|Q8WVM8|SCFD1_HUMAN	SCFD1	Sec1 family domain-containing protein 1 OS=Homo sapiens OX=9606 GN=SCFD1 PE=1 SV=4	0.276672	6.51098	1.48456	0.145295	0.729967	-4.53015
sp|Q99733|NP1L4_HUMAN	NAP1L4	Nucleosome assembly protein 1-like 4 OS=Homo sapiens OX=9606 GN=NAP1L4 PE=1 SV=1	0.151878	8.01769	1.49496	0.142216	0.726527	-4.53021
sp|O95847|UCP4_HUMAN	SLC25A27	Mitochondrial uncoupling protein 4 OS=Homo sapiens OX=9606 GN=SLC25A27 PE=2 SV=1	-0.3001	7.05006	-1.4462	0.156999	0.740981	-4.53668
sp|Q14643|ITPR1_HUMAN	ITPR1	Inositol 1,4,5-trisphosphate receptor type 1 OS=Homo sapiens OX=9606 GN=ITPR1 PE=1 SV=3	0.15153	7.26909	1.48818	0.143987	0.729967	-4.53812
sp|Q9NS69|TOM22_HUMAN	TOMM22	Mitochondrial import receptor subunit TOM22 homolog OS=Homo sapiens OX=9606 GN=TOMM22 PE=1 SV=3	0.281298	6.21728	1.44916	0.155929	0.740981	-4.53872
sp|Q9HBL0|TENS1_HUMAN	TNS1	Tensin-1 OS=Homo sapiens OX=9606 GN=TNS1 PE=1 SV=3	-0.161272	7.52889	-1.48709	0.144274	0.729967	-4.53939
sp|P05771|KPCB_HUMAN	PRKCB	Protein kinase C beta type OS=Homo sapiens OX=9606 GN=PRKCB PE=1 SV=4	0.150988	7.44893	1.48665	0.14439	0.729967	-4.5399
sp|Q9Y2R5|RT17_HUMAN	MRPS17	28S ribosomal protein S17, mitochondrial OS=Homo sapiens OX=9606 GN=MRPS17 PE=1 SV=1	0.237844	6.95547	1.44281	0.157945	0.740981	-4.54031
sp|P54289|CA2D1_HUMAN	CACNA2D1	Voltage-dependent calcium channel subunit alpha-2/delta-1 OS=Homo sapiens OX=9606 GN=CACNA2D1 PE=1 SV=3	0.117154	8.01393	1.4861	0.144536	0.729967	-4.54055
sp|O75396|SC22B_HUMAN	SEC22B	Vesicle-trafficking protein SEC22b OS=Homo sapiens OX=9606 GN=SEC22B PE=1 SV=5	-0.150128	7.69366	-1.48398	0.145094	0.729967	-4.543
sp|Q15382|RHEB_HUMAN	RHEB	GTP-binding protein Rheb OS=Homo sapiens OX=9606 GN=RHEB PE=1 SV=1	-0.149247	7.7019	-1.48338	0.145252	0.729967	-4.5437
sp|Q8N3E9|PLCD3_HUMAN	PLCD3	1-phosphatidylinositol 4,5-bisphosphate phosphodiesterase delta-3 OS=Homo sapiens OX=9606 GN=PLCD3 PE=1 SV=3	0.143414	7.5722	1.48331	0.145272	0.729967	-4.54379
sp|P49768|PSN1_HUMAN	PSEN1	Presenilin-1 OS=Homo sapiens OX=9606 GN=PSEN1 PE=1 SV=1	-0.274105	8.7804	-1.47239	0.148537	0.73669	-4.54407
sp|P19338|NUCL_HUMAN	NCL	Nucleolin OS=Homo sapiens OX=9606 GN=NCL PE=1 SV=3	-0.264956	7.31283	-1.48237	0.14552	0.729967	-4.54487
sp|Q66K14|TBC9B_HUMAN	TBC1D9B	TBC1 domain family member 9B OS=Homo sapiens OX=9606 GN=TBC1D9B PE=1 SV=3	-0.153435	7.01139	-1.4822	0.145565	0.729967	-4.54507
sp|P62341|SELT_HUMAN	SELENOT	Thioredoxin reductase-like selenoprotein T OS=Homo sapiens OX=9606 GN=SELENOT PE=1 SV=2	-0.278722	6.50855	-1.40142	0.171671	0.749512	-4.54529
sp|P10321|HLAC_HUMAN	HLA-C	HLA class I histocompatibility antigen, C alpha chain OS=Homo sapiens OX=9606 GN=HLA-C PE=1 SV=3	-0.427239	8.36822	-1.46786	0.149757	0.73921	-4.54922
sp|P13645|K1C10_HUMAN	KRT10	Keratin, type I cytoskeletal 10 OS=Homo sapiens OX=9606 GN=KRT10 PE=1 SV=6	-0.71099	8.58197	-1.47333	0.148104	0.73669	-4.54935
sp|P22033|MUTA_HUMAN	MMUT	Methylmalonyl-CoA mutase, mitochondrial OS=Homo sapiens OX=9606 GN=MMUT PE=1 SV=4	0.296165	7.12098	1.47772	0.146756	0.735039	-4.55027
sp|P52594|AGFG1_HUMAN	AGFG1	Arf-GAP domain and FG repeat-containing protein 1 OS=Homo sapiens OX=9606 GN=AGFG1 PE=1 SV=2	-0.14783	7.14082	-1.47074	0.148801	0.73669	-4.55232
sp|Q8N2F6|ARM10_HUMAN	ARMC10	Armadillo repeat-containing protein 10 OS=Homo sapiens OX=9606 GN=ARMC10 PE=1 SV=1	-0.202709	7.61405	-1.4752	0.147431	0.736615	-4.55319
tr|A0A590UK28|A0A590UK28_HUMAN	GNAS	GNAS complex locus OS=Homo sapiens OX=9606 GN=GNAS PE=1 SV=2	-0.274326	7.44925	-1.41031	0.16807	0.744658	-4.55396
sp|O14775|GNB5_HUMAN	GNB5	Guanine nucleotide-binding protein subunit beta-5 OS=Homo sapiens OX=9606 GN=GNB5 PE=1 SV=2	0.124371	7.84852	1.47372	0.147828	0.73669	-4.5549
sp|P04003|C4BPA_HUMAN	C4BPA	C4b-binding protein alpha chain OS=Homo sapiens OX=9606 GN=C4BPA PE=1 SV=2	-0.447535	8.65026	-1.47331	0.147938	0.73669	-4.55537
sp|Q8TCD5|NT5C_HUMAN	NT5C	5'(3')-deoxyribonucleotidase, cytosolic type OS=Homo sapiens OX=9606 GN=NT5C PE=1 SV=2	0.16546	8.31385	1.46095	0.151636	0.740981	-4.55706
sp|Q6UW02|CP20A_HUMAN	CYP20A1	Cytochrome P450 20A1 OS=Homo sapiens OX=9606 GN=CYP20A1 PE=1 SV=1	-0.165678	7.27348	-1.46097	0.151631	0.740981	-4.55768
sp|P13693|TCTP_HUMAN	TPT1	Translationally-controlled tumor protein OS=Homo sapiens OX=9606 GN=TPT1 PE=1 SV=1	0.208083	7.30453	1.47097	0.148566	0.73669	-4.55807
sp|Q96DB2|HDA11_HUMAN	HDAC11	Histone deacetylase 11 OS=Homo sapiens OX=9606 GN=HDAC11 PE=1 SV=1	0.173611	7.57924	1.46978	0.148886	0.73669	-4.55943
sp|Q9H0W9|CK054_HUMAN	C11orf54	Ester hydrolase C11orf54 OS=Homo sapiens OX=9606 GN=C11orf54 PE=1 SV=1	0.208889	6.63727	1.4246	0.163108	0.740981	-4.55971
sp|Q9NRF8|PYRG2_HUMAN	CTPS2	CTP synthase 2 OS=Homo sapiens OX=9606 GN=CTPS2 PE=1 SV=1	0.330516	5.99773	1.31958	0.200496	0.772386	-4.5619
sp|Q9NQ79|CRAC1_HUMAN	CRTAC1	Cartilage acidic protein 1 OS=Homo sapiens OX=9606 GN=CRTAC1 PE=1 SV=2	0.148706	6.8152	1.42401	0.163034	0.740981	-4.5626
sp|O95294|RASL1_HUMAN	RASAL1	RasGAP-activating-like protein 1 OS=Homo sapiens OX=9606 GN=RASAL1 PE=1 SV=3	-0.22744	7.20216	-1.46658	0.149754	0.73921	-4.56313
sp|Q8N697|S15A4_HUMAN	SLC15A4	Solute carrier family 15 member 4 OS=Homo sapiens OX=9606 GN=SLC15A4 PE=1 SV=1	-0.331812	7.74774	-1.46006	0.151699	0.740981	-4.56451
sp|Q04941|PLP2_HUMAN	PLP2	Proteolipid protein 2 OS=Homo sapiens OX=9606 GN=PLP2 PE=1 SV=1	-0.271611	11.8843	-1.45881	0.152044	0.740981	-4.56595
sp|P63215|GBG3_HUMAN	GNG3	Guanine nucleotide-binding protein G(I)/G(S)/G(O) subunit gamma-3 OS=Homo sapiens OX=9606 GN=GNG3 PE=1 SV=1	0.211189	9.78251	1.46401	0.15045	0.740336	-4.56608
sp|Q6KCM7|SCMC2_HUMAN	SLC25A25	Calcium-binding mitochondrial carrier protein SCaMC-2 OS=Homo sapiens OX=9606 GN=SLC25A25 PE=1 SV=1	-0.172232	7.32212	-1.46373	0.150528	0.740336	-4.5664
sp|P54829|PTN5_HUMAN	PTPN5	Tyrosine-protein phosphatase non-receptor type 5 OS=Homo sapiens OX=9606 GN=PTPN5 PE=1 SV=4	0.19805	6.14557	1.45744	0.152417	0.740981	-4.56749
sp|Q09028|RBBP4_HUMAN	RBBP4	Histone-binding protein RBBP4 OS=Homo sapiens OX=9606 GN=RBBP4 PE=1 SV=3	0.262041	7.23457	1.44997	0.154659	0.740981	-4.56944
tr|A0A140T9D4|A0A140T9D4_HUMAN	HLA-B	HLA class I histocompatibility antigen, B alpha chain (Fragment) OS=Homo sapiens OX=9606 GN=HLA-B PE=1 SV=1	-0.396364	7.37449	-1.36007	0.185024	0.763224	-4.5702
sp|Q8WVD5|RN141_HUMAN	RNF141	RING finger protein 141 OS=Homo sapiens OX=9606 GN=RNF141 PE=1 SV=1	0.199387	7.28715	1.38924	0.174329	0.7519	-4.57153
sp|Q08462|ADCY2_HUMAN	ADCY2	Adenylate cyclase type 2 OS=Homo sapiens OX=9606 GN=ADCY2 PE=1 SV=5	-0.162552	7.43504	-1.45806	0.152075	0.740981	-4.57289
sp|P61006|RAB8A_HUMAN	RAB8A	Ras-related protein Rab-8A OS=Homo sapiens OX=9606 GN=RAB8A PE=1 SV=1	-0.178023	7.22934	-1.45664	0.152466	0.740981	-4.57452
sp|Q9H269|VPS16_HUMAN	VPS16	Vacuolar protein sorting-associated protein 16 homolog OS=Homo sapiens OX=9606 GN=VPS16 PE=1 SV=2	0.12457	7.04111	1.45633	0.152551	0.740981	-4.57487
sp|Q969E4|TCAL3_HUMAN	TCEAL3	Transcription elongation factor A protein-like 3 OS=Homo sapiens OX=9606 GN=TCEAL3 PE=1 SV=1	-0.237697	7.45643	-1.4098	0.167405	0.743259	-4.57533
sp|Q8TEH3|DEN1A_HUMAN	DENND1A	DENN domain-containing protein 1A OS=Homo sapiens OX=9606 GN=DENND1A PE=1 SV=2	-0.289718	8.45118	-1.42177	0.163451	0.740981	-4.57631
sp|Q08431|MFGM_HUMAN	MFGE8	Lactadherin OS=Homo sapiens OX=9606 GN=MFGE8 PE=1 SV=3	-0.40639	8.86057	-1.45505	0.152904	0.740981	-4.57634
sp|P13798|ACPH_HUMAN	APEH	Acylamino-acid-releasing enzyme OS=Homo sapiens OX=9606 GN=APEH PE=1 SV=4	-0.166645	7.52972	-1.45503	0.15291	0.740981	-4.57636
sp|Q02218|ODO1_HUMAN	OGDH	2-oxoglutarate dehydrogenase complex component E1 OS=Homo sapiens OX=9606 GN=OGDH PE=1 SV=3	0.126435	7.52867	1.45369	0.153278	0.740981	-4.57788
sp|Q96JD6|AKCL2_HUMAN	AKR1E2	1,5-anhydro-D-fructose reductase OS=Homo sapiens OX=9606 GN=AKR1E2 PE=1 SV=2	-0.385689	10.3311	-1.4359	0.15879	0.740981	-4.57952
sp|Q9NVH0|EXD2_HUMAN	EXD2	Exonuclease 3'-5' domain-containing protein 2 OS=Homo sapiens OX=9606 GN=EXD2 PE=1 SV=2	0.209503	6.609	1.39223	0.173144	0.749741	-4.58024
sp|P05186|PPBT_HUMAN	ALPL	Alkaline phosphatase, tissue-nonspecific isozyme OS=Homo sapiens OX=9606 GN=ALPL PE=1 SV=4	-0.234545	7.87628	-1.45138	0.153917	0.740981	-4.58052
sp|P30085|KCY_HUMAN	CMPK1	UMP-CMP kinase OS=Homo sapiens OX=9606 GN=CMPK1 PE=1 SV=3	0.123334	7.54334	1.45138	0.153917	0.740981	-4.58052
sp|P24844|MYL9_HUMAN	MYL9	Myosin regulatory light polypeptide 9 OS=Homo sapiens OX=9606 GN=MYL9 PE=1 SV=4	-0.245828	9.33579	-1.45118	0.153975	0.740981	-4.58076
sp|P62753|RS6_HUMAN	RPS6	40S ribosomal protein S6 OS=Homo sapiens OX=9606 GN=RPS6 PE=1 SV=1	-0.146936	7.94217	-1.45096	0.154033	0.740981	-4.581
sp|Q63HR2|TENS2_HUMAN	TNS2	Tensin-2 OS=Homo sapiens OX=9606 GN=TNS2 PE=1 SV=2	-0.216069	6.84703	-1.44524	0.155798	0.740981	-4.58132
sp|O14490|DLGP1_HUMAN	DLGAP1	Disks large-associated protein 1 OS=Homo sapiens OX=9606 GN=DLGAP1 PE=1 SV=1	0.202655	6.46237	1.35536	0.186105	0.765292	-4.58259
sp|Q96D96|HVCN1_HUMAN	HVCN1	Voltage-gated hydrogen channel 1 OS=Homo sapiens OX=9606 GN=HVCN1 PE=1 SV=1	-0.218434	7.05307	-1.44945	0.154454	0.740981	-4.58272
sp|Q8IYQ7|THNS1_HUMAN	THNSL1	Threonine synthase-like 1 OS=Homo sapiens OX=9606 GN=THNSL1 PE=1 SV=2	0.170924	6.50899	1.44945	0.154454	0.740981	-4.58272
sp|P82675|RT05_HUMAN	MRPS5	28S ribosomal protein S5, mitochondrial OS=Homo sapiens OX=9606 GN=MRPS5 PE=1 SV=2	-0.255491	6.90727	-1.29201	0.209714	0.780976	-4.58424
sp|Q9C0H9|SRCN1_HUMAN	SRCIN1	SRC kinase signaling inhibitor 1 OS=Homo sapiens OX=9606 GN=SRCIN1 PE=1 SV=4	0.122953	6.97469	1.44762	0.154962	0.740981	-4.5848
sp|P47869|GBRA2_HUMAN	GABRA2	Gamma-aminobutyric acid receptor subunit alpha-2 OS=Homo sapiens OX=9606 GN=GABRA2 PE=1 SV=2	0.294363	8.71247	1.30242	0.206196	0.780099	-4.58547
sp|Q16653|MOG_HUMAN	MOG	Myelin-oligodendrocyte glycoprotein OS=Homo sapiens OX=9606 GN=MOG PE=1 SV=2	0.260125	9.9243	1.44656	0.155258	0.740981	-4.58601
sp|P62910|RL32_HUMAN	RPL32	60S ribosomal protein L32 OS=Homo sapiens OX=9606 GN=RPL32 PE=1 SV=2	-0.0949843	7.45926	-1.44582	0.155464	0.740981	-4.58685
sp|Q13336|UT1_HUMAN	SLC14A1	Urea transporter 1 OS=Homo sapiens OX=9606 GN=SLC14A1 PE=1 SV=2	-0.198494	8.84189	-1.44028	0.157188	0.740981	-4.58691
sp|Q86X55|CARM1_HUMAN	CARM1	Histone-arginine methyltransferase CARM1 OS=Homo sapiens OX=9606 GN=CARM1 PE=1 SV=3	0.120594	7.20107	1.44018	0.157215	0.740981	-4.58702
sp|P43007|SATT_HUMAN	SLC1A4	Neutral amino acid transporter A OS=Homo sapiens OX=9606 GN=SLC1A4 PE=1 SV=1	-0.250626	8.79721	-1.44518	0.155644	0.740981	-4.58758
sp|P62854|RS26_HUMAN	RPS26	40S ribosomal protein S26 OS=Homo sapiens OX=9606 GN=RPS26 PE=1 SV=3	0.229221	7.6685	1.42029	0.163454	0.740981	-4.58989
sp|P10768|ESTD_HUMAN	ESD	S-formylglutathione hydrolase OS=Homo sapiens OX=9606 GN=ESD PE=1 SV=2	-0.234655	8.29462	-1.44277	0.156316	0.740981	-4.5903
sp|P48444|COPD_HUMAN	ARCN1	Coatomer subunit delta OS=Homo sapiens OX=9606 GN=ARCN1 PE=1 SV=1	-0.119557	6.92598	-1.44187	0.15657	0.740981	-4.59133
sp|Q01432|AMPD3_HUMAN	AMPD3	AMP deaminase 3 OS=Homo sapiens OX=9606 GN=AMPD3 PE=1 SV=1	-0.131294	7.08151	-1.44107	0.156795	0.740981	-4.59223
sp|Q03135|CAV1_HUMAN	CAV1	Caveolin-1 OS=Homo sapiens OX=9606 GN=CAV1 PE=1 SV=4	-0.303628	8.55136	-1.44061	0.156924	0.740981	-4.59275
sp|P30533|AMRP_HUMAN	LRPAP1	Alpha-2-macroglobulin receptor-associated protein OS=Homo sapiens OX=9606 GN=LRPAP1 PE=1 SV=1	-0.153179	7.3993	-1.44003	0.157086	0.740981	-4.59341
sp|P55058|PLTP_HUMAN	PLTP	Phospholipid transfer protein OS=Homo sapiens OX=9606 GN=PLTP PE=1 SV=1	-0.201749	7.55163	-1.4333	0.159161	0.740981	-4.59474
sp|Q8IUR0|TPPC5_HUMAN	TRAPPC5	Trafficking protein particle complex subunit 5 OS=Homo sapiens OX=9606 GN=TRAPPC5 PE=1 SV=1	-0.240176	7.53052	-1.40973	0.166734	0.743219	-4.59547
sp|P35080|PROF2_HUMAN	PFN2	Profilin-2 OS=Homo sapiens OX=9606 GN=PFN2 PE=1 SV=3	0.135695	9.88062	1.43727	0.157866	0.740981	-4.59653
sp|P11234|RALB_HUMAN	RALB	Ras-related protein Ral-B OS=Homo sapiens OX=9606 GN=RALB PE=1 SV=1	-0.122682	8.83167	-1.43599	0.158227	0.740981	-4.59797
sp|Q9HBL8|NMRL1_HUMAN	NMRAL1	NmrA-like family domain-containing protein 1 OS=Homo sapiens OX=9606 GN=NMRAL1 PE=1 SV=1	0.231265	5.89511	1.28425	0.212367	0.782887	-4.60044
sp|Q9NX63|MIC19_HUMAN	CHCHD3	MICOS complex subunit MIC19 OS=Homo sapiens OX=9606 GN=CHCHD3 PE=1 SV=1	-0.202996	8.19984	-1.43347	0.158942	0.740981	-4.60082
sp|P41252|SYIC_HUMAN	IARS1	Isoleucine--tRNA ligase, cytoplasmic OS=Homo sapiens OX=9606 GN=IARS1 PE=1 SV=2	0.107143	7.24744	1.43297	0.159084	0.740981	-4.60138
sp|Q92973|TNPO1_HUMAN	TNPO1	Transportin-1 OS=Homo sapiens OX=9606 GN=TNPO1 PE=1 SV=2	0.181537	6.91373	1.43282	0.159128	0.740981	-4.60155
sp|Q8WXD9|CSKI1_HUMAN	CASKIN1	Caskin-1 OS=Homo sapiens OX=9606 GN=CASKIN1 PE=1 SV=1	0.161795	6.77135	1.43246	0.159229	0.740981	-4.60195
sp|Q86WK6|AMGO1_HUMAN	AMIGO1	Amphoterin-induced protein 1 OS=Homo sapiens OX=9606 GN=AMIGO1 PE=1 SV=1	-0.171213	7.37598	-1.37568	0.177895	0.758278	-4.6028
sp|Q9BR01|ST4A1_HUMAN	SULT4A1	Sulfotransferase 4A1 OS=Homo sapiens OX=9606 GN=SULT4A1 PE=1 SV=2	0.137663	7.2205	1.42939	0.160105	0.740981	-4.60541
sp|Q9UPQ3|AGAP1_HUMAN	AGAP1	Arf-GAP with GTPase, ANK repeat and PH domain-containing protein 1 OS=Homo sapiens OX=9606 GN=AGAP1 PE=1 SV=4	0.141288	6.91667	1.42855	0.160344	0.740981	-4.60635
sp|Q8NHS3|MFSD8_HUMAN	MFSD8	Major facilitator superfamily domain-containing protein 8 OS=Homo sapiens OX=9606 GN=MFSD8 PE=1 SV=1	0.214022	6.73676	1.4284	0.160387	0.740981	-4.60652
sp|P51116|FXR2_HUMAN	FXR2	RNA-binding protein FXR2 OS=Homo sapiens OX=9606 GN=FXR2 PE=1 SV=2	-0.156439	6.78868	-1.41716	0.163975	0.741423	-4.60663
sp|Q9H1U4|MEGF9_HUMAN	MEGF9	Multiple epidermal growth factor-like domains protein 9 OS=Homo sapiens OX=9606 GN=MEGF9 PE=2 SV=3	-0.168261	6.76566	-1.42802	0.160497	0.740981	-4.60695
sp|P13637|AT1A3_HUMAN	ATP1A3	Sodium/potassium-transporting ATPase subunit alpha-3 OS=Homo sapiens OX=9606 GN=ATP1A3 PE=1 SV=3	0.120739	10.8178	1.42799	0.160504	0.740981	-4.60698
sp|Q9BW92|SYTM_HUMAN	TARS2	Threonine--tRNA ligase, mitochondrial OS=Homo sapiens OX=9606 GN=TARS2 PE=1 SV=1	0.257389	6.26895	1.36564	0.181267	0.760465	-4.60714
sp|Q8WVC6|DCAKD_HUMAN	DCAKD	Dephospho-CoA kinase domain-containing protein OS=Homo sapiens OX=9606 GN=DCAKD PE=1 SV=1	-0.189117	7.625	-1.42777	0.160569	0.740981	-4.60723
sp|Q9HD26|GOPC_HUMAN	GOPC	Golgi-associated PDZ and coiled-coil motif-containing protein OS=Homo sapiens OX=9606 GN=GOPC PE=1 SV=1	-0.168967	6.62019	-1.42528	0.161281	0.740981	-4.61002
sp|P27701|CD82_HUMAN	CD82	CD82 antigen OS=Homo sapiens OX=9606 GN=CD82 PE=1 SV=1	-0.275202	8.43293	-1.4194	0.16315	0.740981	-4.61025
sp|Q9ULX7|CAH14_HUMAN	CA14	Carbonic anhydrase 14 OS=Homo sapiens OX=9606 GN=CA14 PE=1 SV=1	-0.215872	7.4697	-1.42446	0.161518	0.740981	-4.61095
sp|O43772|MCAT_HUMAN	SLC25A20	Mitochondrial carnitine/acylcarnitine carrier protein OS=Homo sapiens OX=9606 GN=SLC25A20 PE=1 SV=1	-0.19954	7.65656	-1.42426	0.161575	0.740981	-4.61116
sp|P09211|GSTP1_HUMAN	GSTP1	Glutathione S-transferase P OS=Homo sapiens OX=9606 GN=GSTP1 PE=1 SV=2	-0.215465	7.58381	-1.42411	0.161618	0.740981	-4.61133
sp|P53396|ACLY_HUMAN	ACLY	ATP-citrate synthase OS=Homo sapiens OX=9606 GN=ACLY PE=1 SV=3	0.107477	7.73983	1.42355	0.16178	0.740981	-4.61196
sp|Q14694|UBP10_HUMAN	USP10	Ubiquitin carboxyl-terminal hydrolase 10 OS=Homo sapiens OX=9606 GN=USP10 PE=1 SV=2	0.197698	6.53834	1.41781	0.163608	0.740981	-4.612
sp|Q16853|AOC3_HUMAN	AOC3	Membrane primary amine oxidase OS=Homo sapiens OX=9606 GN=AOC3 PE=1 SV=3	-0.33614	9.06903	-1.42324	0.161869	0.740981	-4.61231
sp|Q9NUQ2|PLCE_HUMAN	AGPAT5	1-acyl-sn-glycerol-3-phosphate acyltransferase epsilon OS=Homo sapiens OX=9606 GN=AGPAT5 PE=1 SV=3	-0.188544	7.49372	-1.4225	0.162082	0.740981	-4.61314
sp|O75352|MPU1_HUMAN	MPDU1	Mannose-P-dolichol utilization defect 1 protein OS=Homo sapiens OX=9606 GN=MPDU1 PE=1 SV=2	-0.507124	5.61054	-1.24942	0.223521	0.788829	-4.61338
sp|O95208|EPN2_HUMAN	EPN2	Epsin-2 OS=Homo sapiens OX=9606 GN=EPN2 PE=1 SV=3	0.171637	6.60163	1.33031	0.193416	0.768744	-4.61425
sp|Q9NZB2|F120A_HUMAN	FAM120A	Constitutive coactivator of PPAR-gamma-like protein 1 OS=Homo sapiens OX=9606 GN=FAM120A PE=1 SV=2	-0.115963	6.81035	-1.4207	0.162602	0.740981	-4.61515
sp|P48553|TPC10_HUMAN	TRAPPC10	Trafficking protein particle complex subunit 10 OS=Homo sapiens OX=9606 GN=TRAPPC10 PE=1 SV=2	-0.176977	5.82871	-1.41433	0.164622	0.741779	-4.61587
sp|Q8NBF2|NHLC2_HUMAN	NHLRC2	NHL repeat-containing protein 2 OS=Homo sapiens OX=9606 GN=NHLRC2 PE=1 SV=1	0.13913	6.94575	1.4198	0.162862	0.740981	-4.61615
sp|Q8WUK0|PTPM1_HUMAN	PTPMT1	Phosphatidylglycerophosphatase and protein-tyrosine phosphatase 1 OS=Homo sapiens OX=9606 GN=PTPMT1 PE=1 SV=1	-0.214082	7.37245	-1.41377	0.164784	0.741779	-4.61648
sp|O14924|RGS12_HUMAN	RGS12	Regulator of G-protein signaling 12 OS=Homo sapiens OX=9606 GN=RGS12 PE=1 SV=1	0.240965	6.66754	1.37001	0.17939	0.760463	-4.6166
sp|Q9UP95|S12A4_HUMAN	SLC12A4	Solute carrier family 12 member 4 OS=Homo sapiens OX=9606 GN=SLC12A4 PE=1 SV=2	-0.149833	7.32119	-1.41898	0.163101	0.740981	-4.61708
sp|Q9Y666|S12A7_HUMAN	SLC12A7	Solute carrier family 12 member 7 OS=Homo sapiens OX=9606 GN=SLC12A7 PE=1 SV=3	-0.235746	6.29645	-1.39559	0.170719	0.747948	-4.61734
sp|P00441|SODC_HUMAN	SOD1	Superoxide dismutase [Cu-Zn] OS=Homo sapiens OX=9606 GN=SOD1 PE=1 SV=2	0.231246	9.22081	1.41855	0.163225	0.740981	-4.61755
sp|P69892|HBG2_HUMAN	HBG2	Hemoglobin subunit gamma-2 OS=Homo sapiens OX=9606 GN=HBG2 PE=1 SV=2	-0.601894	8.15907	-1.39429	0.171106	0.74884	-4.61799
sp|P19440|GGT1_HUMAN	GGT1	Glutathione hydrolase 1 proenzyme OS=Homo sapiens OX=9606 GN=GGT1 PE=1 SV=2	-0.183009	8.24751	-1.41692	0.163697	0.740981	-4.61937
sp|Q86YR5|GPSM1_HUMAN	GPSM1	G-protein-signaling modulator 1 OS=Homo sapiens OX=9606 GN=GPSM1 PE=1 SV=2	-0.130695	6.7789	-1.41082	0.165647	0.741779	-4.61974
sp|P35270|SPRE_HUMAN	SPR	Sepiapterin reductase OS=Homo sapiens OX=9606 GN=SPR PE=1 SV=1	0.147862	7.93702	1.41057	0.16572	0.741779	-4.62002
sp|Q9UNN8|EPCR_HUMAN	PROCR	Endothelial protein C receptor OS=Homo sapiens OX=9606 GN=PROCR PE=1 SV=1	0.42308	6.82888	1.34813	0.186775	0.766585	-4.62173
sp|P02768|ALBU_HUMAN	ALB	Albumin OS=Homo sapiens OX=9606 GN=ALB PE=1 SV=2	-0.27519	9.51486	-1.41431	0.164457	0.741779	-4.62228
sp|Q9Y6K0|CEPT1_HUMAN	CEPT1	Choline/ethanolaminephosphotransferase 1 OS=Homo sapiens OX=9606 GN=CEPT1 PE=1 SV=1	0.35079	6.56505	1.33099	0.192876	0.768744	-4.62364
sp|Q96SU4|OSBL9_HUMAN	OSBPL9	Oxysterol-binding protein-related protein 9 OS=Homo sapiens OX=9606 GN=OSBPL9 PE=1 SV=2	-0.206164	6.55117	-1.35891	0.18285	0.761937	-4.62529
sp|Q9UBI6|GBG12_HUMAN	GNG12	Guanine nucleotide-binding protein G(I)/G(S)/G(O) subunit gamma-12 OS=Homo sapiens OX=9606 GN=GNG12 PE=1 SV=3	-0.202957	9.71237	-1.41053	0.165563	0.741779	-4.62648
sp|P54803|GALC_HUMAN	GALC	Galactocerebrosidase OS=Homo sapiens OX=9606 GN=GALC PE=1 SV=3	0.235108	8.24961	1.4099	0.165748	0.741779	-4.62718
sp|A0FGR8|ESYT2_HUMAN	ESYT2	Extended synaptotagmin-2 OS=Homo sapiens OX=9606 GN=ESYT2 PE=1 SV=1	-0.152501	7.77391	-1.4098	0.165779	0.741779	-4.6273
sp|Q96HS1|PGAM5_HUMAN	PGAM5	Serine/threonine-protein phosphatase PGAM5, mitochondrial OS=Homo sapiens OX=9606 GN=PGAM5 PE=1 SV=2	-0.159563	7.51614	-1.40935	0.16591	0.741779	-4.62779
sp|Q02153|GCYB1_HUMAN	GUCY1B1	Guanylate cyclase soluble subunit beta-1 OS=Homo sapiens OX=9606 GN=GUCY1B1 PE=1 SV=1	0.105154	7.29666	1.40888	0.166048	0.741779	-4.62832
sp|Q9BYD2|RM09_HUMAN	MRPL9	39S ribosomal protein L9, mitochondrial OS=Homo sapiens OX=9606 GN=MRPL9 PE=1 SV=2	0.276057	7.0707	1.39647	0.170073	0.746716	-4.62862
sp|P46379|BAG6_HUMAN	BAG6	Large proline-rich protein BAG6 OS=Homo sapiens OX=9606 GN=BAG6 PE=1 SV=2	0.178451	7.3197	1.40733	0.166505	0.743009	-4.63004
sp|Q05086|UBE3A_HUMAN	UBE3A	Ubiquitin-protein ligase E3A OS=Homo sapiens OX=9606 GN=UBE3A PE=1 SV=4	0.146372	7.00901	1.36919	0.179176	0.760463	-4.63115
sp|Q9Y624|JAM1_HUMAN	F11R	Junctional adhesion molecule A OS=Homo sapiens OX=9606 GN=F11R PE=1 SV=1	-0.172395	8.14833	-1.40581	0.166951	0.743259	-4.63171
sp|P13647|K2C5_HUMAN	KRT5	Keratin, type II cytoskeletal 5 OS=Homo sapiens OX=9606 GN=KRT5 PE=1 SV=3	-0.576894	8.09381	-1.33393	0.19162	0.768744	-4.63209
sp|Q9P2A4|ABI3_HUMAN	ABI3	ABI gene family member 3 OS=Homo sapiens OX=9606 GN=ABI3 PE=1 SV=2	-0.191356	7.56437	-1.3318	0.192313	0.768744	-4.63214
sp|P14174|MIF_HUMAN	MIF	Macrophage migration inhibitory factor OS=Homo sapiens OX=9606 GN=MIF PE=1 SV=4	0.2743	12.0278	1.40461	0.167306	0.743259	-4.63305
sp|Q9NRW1|RAB6B_HUMAN	RAB6B	Ras-related protein Rab-6B OS=Homo sapiens OX=9606 GN=RAB6B PE=1 SV=1	0.134179	9.10987	1.40406	0.16747	0.743259	-4.63366
sp|Q6P2E9|EDC4_HUMAN	EDC4	Enhancer of mRNA-decapping protein 4 OS=Homo sapiens OX=9606 GN=EDC4 PE=1 SV=1	-0.337509	6.2102	-1.31928	0.196414	0.770591	-4.63387
sp|Q9HCP6|HHATL_HUMAN	HHATL	Protein-cysteine N-palmitoyltransferase HHAT-like protein OS=Homo sapiens OX=9606 GN=HHATL PE=1 SV=1	-0.281979	8.31428	-1.40157	0.168208	0.744658	-4.63641
sp|P56537|IF6_HUMAN	EIF6	Eukaryotic translation initiation factor 6 OS=Homo sapiens OX=9606 GN=EIF6 PE=1 SV=1	-0.162116	6.84198	-1.38198	0.174633	0.7519	-4.63685
sp|P08134|RHOC_HUMAN	RHOC	Rho-related GTP-binding protein RhoC OS=Homo sapiens OX=9606 GN=RHOC PE=1 SV=1	0.287093	9.29236	1.40054	0.168513	0.744658	-4.63754
sp|P22314|UBA1_HUMAN	UBA1	Ubiquitin-like modifier-activating enzyme 1 OS=Homo sapiens OX=9606 GN=UBA1 PE=1 SV=3	0.106775	8.40271	1.39876	0.169044	0.744878	-4.63951
sp|Q9GZT8|NIF3L_HUMAN	NIF3L1	NIF3-like protein 1 OS=Homo sapiens OX=9606 GN=NIF3L1 PE=1 SV=2	-0.171643	7.46891	-1.39854	0.169108	0.744878	-4.63975
sp|P02786|TFR1_HUMAN	TFRC	Transferrin receptor protein 1 OS=Homo sapiens OX=9606 GN=TFRC PE=1 SV=2	-0.193347	7.65179	-1.39776	0.169342	0.745103	-4.64061
sp|O00555|CAC1A_HUMAN	CACNA1A	Voltage-dependent P/Q-type calcium channel subunit alpha-1A OS=Homo sapiens OX=9606 GN=CACNA1A PE=1 SV=3	0.256215	7.17265	1.25793	0.220004	0.786715	-4.64116
sp|P49327|FAS_HUMAN	FASN	Fatty acid synthase OS=Homo sapiens OX=9606 GN=FASN PE=1 SV=3	0.10953	7.63332	1.39663	0.169678	0.745782	-4.64185
sp|P35626|ARBK2_HUMAN	GRK3	Beta-adrenergic receptor kinase 2 OS=Homo sapiens OX=9606 GN=GRK3 PE=1 SV=2	0.234957	6.70059	1.26998	0.215306	0.784248	-4.64476
sp|Q10588|BST1_HUMAN	BST1	ADP-ribosyl cyclase/cyclic ADP-ribose hydrolase 2 OS=Homo sapiens OX=9606 GN=BST1 PE=1 SV=2	0.32027	6.61437	1.29547	0.205349	0.778046	-4.64501
sp|O43615|TIM44_HUMAN	TIMM44	Mitochondrial import inner membrane translocase subunit TIM44 OS=Homo sapiens OX=9606 GN=TIMM44 PE=1 SV=2	0.210682	6.79434	1.38688	0.172781	0.749512	-4.64598
sp|O15061|SYNEM_HUMAN	SYNM	Synemin OS=Homo sapiens OX=9606 GN=SYNM PE=1 SV=3	-0.149796	6.96015	-1.38668	0.172841	0.749512	-4.6462
sp|O60928|KCJ13_HUMAN	KCNJ13	Inward rectifier potassium channel 13 OS=Homo sapiens OX=9606 GN=KCNJ13 PE=1 SV=1	-0.352833	7.30543	-1.32619	0.193863	0.768744	-4.64624
sp|O96005|CLPT1_HUMAN	CLPTM1	Putative lipid scramblase CLPTM1 OS=Homo sapiens OX=9606 GN=CLPTM1 PE=1 SV=1	-0.20884	7.55962	-1.39042	0.171544	0.749512	-4.64868
sp|Q08AD1|CAMP2_HUMAN	CAMSAP2	Calmodulin-regulated spectrin-associated protein 2 OS=Homo sapiens OX=9606 GN=CAMSAP2 PE=1 SV=3	0.225775	6.3599	1.37811	0.175631	0.753952	-4.64916
sp|Q5U5X0|LYRM7_HUMAN	LYRM7	Complex III assembly factor LYRM7 OS=Homo sapiens OX=9606 GN=LYRM7 PE=1 SV=1	0.385512	7.46646	1.22281	0.234293	0.79894	-4.64978
sp|O00571|DDX3X_HUMAN	DDX3X	ATP-dependent RNA helicase DDX3X OS=Homo sapiens OX=9606 GN=DDX3X PE=1 SV=3	-0.101456	7.63494	-1.38834	0.172172	0.749512	-4.65096
sp|Q5T0F9|C2D1B_HUMAN	CC2D1B	Coiled-coil and C2 domain-containing protein 1B OS=Homo sapiens OX=9606 GN=CC2D1B PE=1 SV=1	-0.209321	6.97742	-1.26637	0.216167	0.784248	-4.65098
sp|Q9H061|T126A_HUMAN	TMEM126A	Transmembrane protein 126A OS=Homo sapiens OX=9606 GN=TMEM126A PE=1 SV=1	-0.217918	8.40019	-1.38827	0.172191	0.749512	-4.65103
sp|Q96JA1|LRIG1_HUMAN	LRIG1	Leucine-rich repeats and immunoglobulin-like domains protein 1 OS=Homo sapiens OX=9606 GN=LRIG1 PE=1 SV=2	0.230072	6.32008	1.35568	0.183188	0.762567	-4.65105
sp|Q9P1Z2|CACO1_HUMAN	CALCOCO1	Calcium-binding and coiled-coil domain-containing protein 1 OS=Homo sapiens OX=9606 GN=CALCOCO1 PE=1 SV=2	-0.164169	6.79521	-1.36278	0.180754	0.760463	-4.65144
sp|Q13263|TIF1B_HUMAN	TRIM28	Transcription intermediary factor 1-beta OS=Homo sapiens OX=9606 GN=TRIM28 PE=1 SV=5	0.482785	6.85565	1.28953	0.207042	0.780853	-4.65222
sp|Q92544|TM9S4_HUMAN	TM9SF4	Transmembrane 9 superfamily member 4 OS=Homo sapiens OX=9606 GN=TM9SF4 PE=1 SV=2	-0.173988	7.99057	-1.38707	0.172556	0.749512	-4.65235
sp|Q9UKK9|NUDT5_HUMAN	NUDT5	ADP-sugar pyrophosphatase OS=Homo sapiens OX=9606 GN=NUDT5 PE=1 SV=1	0.274057	6.61522	1.38701	0.172575	0.749512	-4.65242
sp|Q9GZU7|CTDS1_HUMAN	CTDSP1	Carboxy-terminal domain RNA polymerase II polypeptide A small phosphatase 1 OS=Homo sapiens OX=9606 GN=CTDSP1 PE=1 SV=1	-0.211568	7.1194	-1.36256	0.180824	0.760463	-4.65243
sp|Q92574|TSC1_HUMAN	TSC1	Hamartin OS=Homo sapiens OX=9606 GN=TSC1 PE=1 SV=2	-0.143771	6.97967	-1.38054	0.174711	0.7519	-4.65287
sp|Q9P2U8|VGLU2_HUMAN	SLC17A6	Vesicular glutamate transporter 2 OS=Homo sapiens OX=9606 GN=SLC17A6 PE=2 SV=1	-0.282563	7.85174	-1.38591	0.172908	0.749512	-4.65362
sp|O60841|IF2P_HUMAN	EIF5B	Eukaryotic translation initiation factor 5B OS=Homo sapiens OX=9606 GN=EIF5B PE=1 SV=4	0.179154	6.6049	1.37982	0.174929	0.7519	-4.65365
sp|Q93009|UBP7_HUMAN	USP7	Ubiquitin carboxyl-terminal hydrolase 7 OS=Homo sapiens OX=9606 GN=USP7 PE=1 SV=2	-0.0858497	7.07192	-1.38222	0.17403	0.7519	-4.65765
sp|P10606|COX5B_HUMAN	COX5B	Cytochrome c oxidase subunit 5B, mitochondrial OS=Homo sapiens OX=9606 GN=COX5B PE=1 SV=2	-0.256532	10.64	-1.37995	0.174721	0.7519	-4.66012
sp|Q9H244|P2Y12_HUMAN	P2RY12	P2Y purinoceptor 12 OS=Homo sapiens OX=9606 GN=P2RY12 PE=1 SV=1	-0.202773	9.30065	-1.37932	0.174914	0.7519	-4.6608
sp|Q969X5|ERGI1_HUMAN	ERGIC1	Endoplasmic reticulum-Golgi intermediate compartment protein 1 OS=Homo sapiens OX=9606 GN=ERGIC1 PE=1 SV=1	-0.185564	7.77723	-1.37652	0.175775	0.753952	-4.66386
sp|P62857|RS28_HUMAN	RPS28	40S ribosomal protein S28 OS=Homo sapiens OX=9606 GN=RPS28 PE=1 SV=1	0.230824	7.42469	1.30696	0.20024	0.772386	-4.66493
sp|P15151|PVR_HUMAN	PVR	Poliovirus receptor OS=Homo sapiens OX=9606 GN=PVR PE=1 SV=2	-0.187886	7.62106	-1.37506	0.176224	0.755087	-4.66544
sp|P00966|ASSY_HUMAN	ASS1	Argininosuccinate synthase OS=Homo sapiens OX=9606 GN=ASS1 PE=1 SV=2	-0.239102	7.71001	-1.37407	0.176526	0.755375	-4.66651
sp|Q7L5D6|GET4_HUMAN	GET4	Golgi to ER traffic protein 4 homolog OS=Homo sapiens OX=9606 GN=GET4 PE=1 SV=1	0.169802	7.3503	1.32821	0.192452	0.768744	-4.66671
sp|P13498|CY24A_HUMAN	CYBA	Cytochrome b-245 light chain OS=Homo sapiens OX=9606 GN=CYBA PE=1 SV=3	-0.238689	8.37269	-1.37364	0.17666	0.755375	-4.66698
tr|A0A4W8ZXM2|A0A4W8ZXM2_HUMAN	IGHV3-72	Immunoglobulin heavy variable 3-72 OS=Homo sapiens OX=9606 GN=IGHV3-72 PE=4 SV=1	0.565805	7.76958	1.37299	0.17686	0.755438	-4.66768
sp|Q9H993|ARMT1_HUMAN	ARMT1	Damage-control phosphatase ARMT1 OS=Homo sapiens OX=9606 GN=ARMT1 PE=1 SV=1	-0.11199	6.89547	-1.36527	0.179423	0.760463	-4.66933
sp|P23229|ITA6_HUMAN	ITGA6	Integrin alpha-6 OS=Homo sapiens OX=9606 GN=ITGA6 PE=1 SV=5	-0.139988	7.57963	-1.37053	0.177621	0.757899	-4.67035
sp|P13807|GYS1_HUMAN	GYS1	Glycogen [starch] synthase, muscle OS=Homo sapiens OX=9606 GN=GYS1 PE=1 SV=2	-0.133397	7.63117	-1.36768	0.178507	0.760093	-4.67344
sp|O00400|ACATN_HUMAN	SLC33A1	Acetyl-coenzyme A transporter 1 OS=Homo sapiens OX=9606 GN=SLC33A1 PE=1 SV=1	-0.165437	7.13664	-1.33525	0.189722	0.768744	-4.67371
sp|P10644|KAP0_HUMAN	PRKAR1A	cAMP-dependent protein kinase type I-alpha regulatory subunit OS=Homo sapiens OX=9606 GN=PRKAR1A PE=1 SV=1	-0.144706	7.44265	-1.36636	0.178915	0.760463	-4.67485
sp|Q96QR8|PURB_HUMAN	PURB	Transcriptional activator protein Pur-beta OS=Homo sapiens OX=9606 GN=PURB PE=1 SV=3	-0.134667	7.15114	-1.36314	0.179922	0.760463	-4.67833
sp|P30626|SORCN_HUMAN	SRI	Sorcin OS=Homo sapiens OX=9606 GN=SRI PE=1 SV=1	-0.237259	9.21484	-1.36299	0.179968	0.760463	-4.67849
sp|P48163|MAOX_HUMAN	ME1	NADP-dependent malic enzyme OS=Homo sapiens OX=9606 GN=ME1 PE=1 SV=1	-0.206873	7.79712	-1.36272	0.180054	0.760463	-4.67879
sp|O94766|B3GA3_HUMAN	B3GAT3	Galactosylgalactosylxylosylprotein 3-beta-glucuronosyltransferase 3 OS=Homo sapiens OX=9606 GN=B3GAT3 PE=1 SV=2	-0.186456	7.40892	-1.36209	0.180249	0.760463	-4.67946
sp|O00233|PSMD9_HUMAN	PSMD9	26S proteasome non-ATPase regulatory subunit 9 OS=Homo sapiens OX=9606 GN=PSMD9 PE=1 SV=3	-0.124137	7.58582	-1.36124	0.180515	0.760463	-4.68037
sp|Q01814|AT2B2_HUMAN	ATP2B2	Plasma membrane calcium-transporting ATPase 2 OS=Homo sapiens OX=9606 GN=ATP2B2 PE=1 SV=2	0.126315	9.20361	1.36064	0.180703	0.760463	-4.68102
sp|P63162|RSMN_HUMAN	SNRPN	Small nuclear ribonucleoprotein-associated protein N OS=Homo sapiens OX=9606 GN=SNRPN PE=1 SV=1	0.170524	6.93734	1.35873	0.181305	0.760465	-4.68308
sp|Q6ZN44|UNC5A_HUMAN	UNC5A	Netrin receptor UNC5A OS=Homo sapiens OX=9606 GN=UNC5A PE=1 SV=3	0.206753	6.56113	1.21506	0.235661	0.80027	-4.68317
sp|P14207|FOLR2_HUMAN	FOLR2	Folate receptor beta OS=Homo sapiens OX=9606 GN=FOLR2 PE=1 SV=4	-0.321344	8.35007	-1.35814	0.181489	0.760465	-4.6837
sp|P39023|RL3_HUMAN	RPL3	60S ribosomal protein L3 OS=Homo sapiens OX=9606 GN=RPL3 PE=1 SV=2	-0.100176	7.36152	-1.35732	0.181749	0.760465	-4.68459
sp|Q13596|SNX1_HUMAN	SNX1	Sorting nexin-1 OS=Homo sapiens OX=9606 GN=SNX1 PE=1 SV=3	0.0928825	7.71597	1.35695	0.181865	0.760465	-4.68498
sp|P11940|PABP1_HUMAN	PABPC1	Polyadenylate-binding protein 1 OS=Homo sapiens OX=9606 GN=PABPC1 PE=1 SV=2	0.133699	7.16421	1.35672	0.181939	0.760465	-4.68524
sp|Q8IZ81|ELMD2_HUMAN	ELMOD2	ELMO domain-containing protein 2 OS=Homo sapiens OX=9606 GN=ELMOD2 PE=1 SV=1	-0.204385	6.99528	-1.34416	0.186273	0.765292	-4.68527
sp|P21926|CD9_HUMAN	CD9	CD9 antigen OS=Homo sapiens OX=9606 GN=CD9 PE=1 SV=4	-0.187876	10.8327	-1.35543	0.182345	0.761382	-4.68661
sp|Q9Y4D1|DAAM1_HUMAN	DAAM1	Disheveled-associated activator of morphogenesis 1 OS=Homo sapiens OX=9606 GN=DAAM1 PE=1 SV=2	0.115828	7.40252	1.35467	0.182585	0.761609	-4.68743
sp|Q9BRA2|TXD17_HUMAN	TXNDC17	Thioredoxin domain-containing protein 17 OS=Homo sapiens OX=9606 GN=TXNDC17 PE=1 SV=1	0.229811	6.73294	1.32095	0.194402	0.768744	-4.68831
sp|Q5TC12|ATPF1_HUMAN	ATPAF1	ATP synthase mitochondrial F1 complex assembly factor 1 OS=Homo sapiens OX=9606 GN=ATPAF1 PE=1 SV=1	0.250253	6.63029	1.30187	0.201213	0.772386	-4.69117
sp|O43505|B4GA1_HUMAN	B4GAT1	Beta-1,4-glucuronyltransferase 1 OS=Homo sapiens OX=9606 GN=B4GAT1 PE=1 SV=1	-0.152291	7.78114	-1.35001	0.184062	0.763224	-4.69241
sp|Q9Y4G8|RPGF2_HUMAN	RAPGEF2	Rap guanine nucleotide exchange factor 2 OS=Homo sapiens OX=9606 GN=RAPGEF2 PE=1 SV=1	0.151974	6.80296	1.34929	0.184292	0.763224	-4.69318
sp|O94925|GLSK_HUMAN	GLS	Glutaminase kidney isoform, mitochondrial OS=Homo sapiens OX=9606 GN=GLS PE=1 SV=1	0.194685	7.84586	1.34828	0.184614	0.763224	-4.69426
sp|O60256|KPRB_HUMAN	PRPSAP2	Phosphoribosyl pyrophosphate synthase-associated protein 2 OS=Homo sapiens OX=9606 GN=PRPSAP2 PE=1 SV=1	-0.136333	7.61477	-1.34812	0.184666	0.763224	-4.69443
sp|P12314|FCGR1_HUMAN	FCGR1A	High affinity immunoglobulin gamma Fc receptor I OS=Homo sapiens OX=9606 GN=FCGR1A PE=1 SV=2	-0.186483	8.33628	-1.34802	0.184697	0.763224	-4.69453
sp|P20591|MX1_HUMAN	MX1	Interferon-induced GTP-binding protein Mx1 OS=Homo sapiens OX=9606 GN=MX1 PE=1 SV=4	0.265459	6.95559	1.34776	0.184782	0.763224	-4.69482
sp|Q96N66|MBOA7_HUMAN	MBOAT7	Lysophospholipid acyltransferase 7 OS=Homo sapiens OX=9606 GN=MBOAT7 PE=1 SV=2	-0.20212	8.36058	-1.34712	0.184987	0.763224	-4.6955
sp|P49591|SYSC_HUMAN	SARS1	Serine--tRNA ligase, cytoplasmic OS=Homo sapiens OX=9606 GN=SARS1 PE=1 SV=3	0.105271	7.48249	1.34707	0.185003	0.763224	-4.69555
sp|P53990|IST1_HUMAN	IST1	IST1 homolog OS=Homo sapiens OX=9606 GN=IST1 PE=1 SV=1	-0.115479	8.46127	-1.34447	0.185832	0.765292	-4.69831
sp|P50453|SPB9_HUMAN	SERPINB9	Serpin B9 OS=Homo sapiens OX=9606 GN=SERPINB9 PE=1 SV=1	0.182462	7.00909	1.3032	0.200542	0.772386	-4.69832
sp|P61619|S61A1_HUMAN	SEC61A1	Protein transport protein Sec61 subunit alpha isoform 1 OS=Homo sapiens OX=9606 GN=SEC61A1 PE=1 SV=2	-0.198907	8.23391	-1.33695	0.188421	0.768744	-4.69942
sp|Q9UEY8|ADDG_HUMAN	ADD3	Gamma-adducin OS=Homo sapiens OX=9606 GN=ADD3 PE=1 SV=1	0.135866	8.06504	1.34341	0.186173	0.765292	-4.69944
sp|P28062|PSB8_HUMAN	PSMB8	Proteasome subunit beta type-8 OS=Homo sapiens OX=9606 GN=PSMB8 PE=1 SV=3	-0.187278	7.70175	-1.33889	0.187629	0.768692	-4.70424
sp|P21359|NF1_HUMAN	NF1	Neurofibromin OS=Homo sapiens OX=9606 GN=NF1 PE=1 SV=2	0.131214	7.22935	1.33878	0.187665	0.768692	-4.70436
sp|Q9UN86|G3BP2_HUMAN	G3BP2	Ras GTPase-activating protein-binding protein 2 OS=Homo sapiens OX=9606 GN=G3BP2 PE=1 SV=2	0.150134	6.42933	1.33152	0.190186	0.768744	-4.70512
sp|P21333|FLNA_HUMAN	FLNA	Filamin-A OS=Homo sapiens OX=9606 GN=FLNA PE=1 SV=4	-0.176114	7.71315	-1.33804	0.187905	0.768744	-4.70515
sp|Q5T3F8|CSCL2_HUMAN	TMEM63B	CSC1-like protein 2 OS=Homo sapiens OX=9606 GN=TMEM63B PE=1 SV=1	-0.22055	6.6533	-1.31738	0.195192	0.768744	-4.70603
sp|P55809|SCOT1_HUMAN	OXCT1	Succinyl-CoA:3-ketoacid coenzyme A transferase 1, mitochondrial OS=Homo sapiens OX=9606 GN=OXCT1 PE=1 SV=1	0.167731	7.92536	1.33699	0.188243	0.768744	-4.70625
sp|Q9Y2X7|GIT1_HUMAN	GIT1	ARF GTPase-activating protein GIT1 OS=Homo sapiens OX=9606 GN=GIT1 PE=1 SV=2	-0.0916699	7.72537	-1.33607	0.188543	0.768744	-4.70723
sp|O75663|TIPRL_HUMAN	TIPRL	TIP41-like protein OS=Homo sapiens OX=9606 GN=TIPRL PE=1 SV=2	-0.165501	6.93112	-1.33321	0.189472	0.768744	-4.71025
sp|P62699|YPEL5_HUMAN	YPEL5	Protein yippee-like 5 OS=Homo sapiens OX=9606 GN=YPEL5 PE=1 SV=1	0.209413	6.61787	1.25924	0.216756	0.784248	-4.71026
sp|Q8TD08|MK15_HUMAN	MAPK15	Mitogen-activated protein kinase 15 OS=Homo sapiens OX=9606 GN=MAPK15 PE=1 SV=1	-0.341098	9.08143	-1.27442	0.210894	0.780976	-4.7115
sp|Q9NRW7|VPS45_HUMAN	VPS45	Vacuolar protein sorting-associated protein 45 OS=Homo sapiens OX=9606 GN=VPS45 PE=1 SV=1	-0.11353	7.12805	-1.33112	0.190151	0.768744	-4.71245
sp|P39656|OST48_HUMAN	DDOST	Dolichyl-diphosphooligosaccharide--protein glycosyltransferase 48 kDa subunit OS=Homo sapiens OX=9606 GN=DDOST PE=1 SV=4	-0.222656	8.17133	-1.33071	0.190286	0.768744	-4.71289
sp|Q6ZPD9|D19L3_HUMAN	DPY19L3	Probable C-mannosyltransferase DPY19L3 OS=Homo sapiens OX=9606 GN=DPY19L3 PE=1 SV=1	-0.213813	9.12721	-1.33019	0.190457	0.768744	-4.71344
sp|Q13938|CAYP1_HUMAN	CAPS	Calcyphosin OS=Homo sapiens OX=9606 GN=CAPS PE=1 SV=2	-0.386588	8.08256	-1.3301	0.190484	0.768744	-4.71353
sp|P19474|RO52_HUMAN	TRIM21	E3 ubiquitin-protein ligase TRIM21 OS=Homo sapiens OX=9606 GN=TRIM21 PE=1 SV=1	-0.286288	6.50099	-1.23908	0.224593	0.788829	-4.71374
sp|P60201|MYPR_HUMAN	PLP1	Myelin proteolipid protein OS=Homo sapiens OX=9606 GN=PLP1 PE=1 SV=2	0.220715	12.1176	1.32936	0.190725	0.768744	-4.71431
sp|P42677|RS27_HUMAN	RPS27	40S ribosomal protein S27 OS=Homo sapiens OX=9606 GN=RPS27 PE=1 SV=3	-0.197837	8.88323	-1.32908	0.190818	0.768744	-4.7146
sp|P45381|ACY2_HUMAN	ASPA	Aspartoacylase OS=Homo sapiens OX=9606 GN=ASPA PE=1 SV=1	0.13678	7.07884	1.32807	0.191148	0.768744	-4.71567
sp|P00325|ADH1B_HUMAN	ADH1B	All-trans-retinol dehydrogenase [NAD(+)] ADH1B OS=Homo sapiens OX=9606 GN=ADH1B PE=1 SV=3	-0.324169	7.51798	-1.32716	0.191446	0.768744	-4.71662
sp|Q5SRE7|PHYD1_HUMAN	PHYHD1	Phytanoyl-CoA dioxygenase domain-containing protein 1 OS=Homo sapiens OX=9606 GN=PHYHD1 PE=1 SV=2	0.28843	7.27427	1.32693	0.191524	0.768744	-4.71687
sp|Q99623|PHB2_HUMAN	PHB2	Prohibitin-2 OS=Homo sapiens OX=9606 GN=PHB2 PE=1 SV=2	-0.188255	9.94013	-1.32636	0.191709	0.768744	-4.71747
sp|Q13325|IFIT5_HUMAN	IFIT5	Interferon-induced protein with tetratricopeptide repeats 5 OS=Homo sapiens OX=9606 GN=IFIT5 PE=1 SV=1	0.144568	6.87317	1.32545	0.192008	0.768744	-4.71842
sp|Q9UH65|SWP70_HUMAN	SWAP70	Switch-associated protein 70 OS=Homo sapiens OX=9606 GN=SWAP70 PE=1 SV=1	0.131002	7.17144	1.29752	0.202059	0.773458	-4.71853
sp|P56199|ITA1_HUMAN	ITGA1	Integrin alpha-1 OS=Homo sapiens OX=9606 GN=ITGA1 PE=1 SV=2	-0.170123	7.86297	-1.32526	0.192073	0.768744	-4.71863
sp|O15260|SURF4_HUMAN	SURF4	Surfeit locus protein 4 OS=Homo sapiens OX=9606 GN=SURF4 PE=1 SV=3	-0.237232	9.40593	-1.31856	0.194448	0.768744	-4.71866
sp|Q9ULJ8|NEB1_HUMAN	PPP1R9A	Neurabin-1 OS=Homo sapiens OX=9606 GN=PPP1R9A PE=1 SV=2	-0.211494	6.73425	-1.31749	0.194805	0.768744	-4.71977
sp|Q6GMV2|SMYD5_HUMAN	SMYD5	Histone-lysine N-trimethyltransferase SMYD5 OS=Homo sapiens OX=9606 GN=SMYD5 PE=1 SV=2	0.164497	6.35899	1.3167	0.195065	0.768744	-4.72059
sp|O75912|DGKI_HUMAN	DGKI	Diacylglycerol kinase iota OS=Homo sapiens OX=9606 GN=DGKI PE=1 SV=1	0.189364	8.24227	1.25637	0.217283	0.784248	-4.72092
sp|Q99959|PKP2_HUMAN	PKP2	Plakophilin-2 OS=Homo sapiens OX=9606 GN=PKP2 PE=1 SV=2	-0.200488	6.84736	-1.3156	0.195432	0.768948	-4.72173
sp|P02686|MBP_HUMAN	MBP	Myelin basic protein OS=Homo sapiens OX=9606 GN=MBP PE=1 SV=3	0.215724	11.9929	1.32167	0.193253	0.768744	-4.72238
sp|P50151|GBG10_HUMAN	GNG10	Guanine nucleotide-binding protein G(I)/G(S)/G(O) subunit gamma-10 OS=Homo sapiens OX=9606 GN=GNG10 PE=1 SV=1	0.161988	7.31433	1.32127	0.193387	0.768744	-4.72281
sp|Q14247|SRC8_HUMAN	CTTN	Src substrate cortactin OS=Homo sapiens OX=9606 GN=CTTN PE=1 SV=2	-0.10113	7.01998	-1.32082	0.193534	0.768744	-4.72327
sp|Q3LXA3|TKFC_HUMAN	TKFC	Triokinase/FMN cyclase OS=Homo sapiens OX=9606 GN=TKFC PE=1 SV=2	-0.167032	6.38461	-1.32069	0.193578	0.768744	-4.72341
sp|O00401|WASL_HUMAN	WASL	Actin nucleation-promoting factor WASL OS=Homo sapiens OX=9606 GN=WASL PE=1 SV=2	-0.26225	7.02283	-1.12004	0.274735	0.832931	-4.72347
sp|Q8TDC3|BRSK1_HUMAN	BRSK1	Serine/threonine-protein kinase BRSK1 OS=Homo sapiens OX=9606 GN=BRSK1 PE=1 SV=2	-0.152978	6.78457	-1.31392	0.195991	0.770408	-4.72347
sp|Q92871|PMM1_HUMAN	PMM1	Phosphomannomutase 1 OS=Homo sapiens OX=9606 GN=PMM1 PE=1 SV=2	0.179581	6.73744	1.27736	0.209416	0.780976	-4.72382
sp|Q02952|AKA12_HUMAN	AKAP12	A-kinase anchor protein 12 OS=Homo sapiens OX=9606 GN=AKAP12 PE=1 SV=4	-0.144354	7.12826	-1.32001	0.193803	0.768744	-4.72413
sp|Q01085|TIAR_HUMAN	TIAL1	Nucleolysin TIAR OS=Homo sapiens OX=9606 GN=TIAL1 PE=1 SV=1	0.164681	6.99169	1.21446	0.234019	0.798671	-4.72449
sp|Q8NBJ4|GOLM1_HUMAN	GOLM1	Golgi membrane protein 1 OS=Homo sapiens OX=9606 GN=GOLM1 PE=1 SV=1	-0.216652	7.66598	-1.31961	0.193937	0.768744	-4.72455
sp|O95167|NDUA3_HUMAN	NDUFA3	NADH dehydrogenase [ubiquinone] 1 alpha subcomplex subunit 3 OS=Homo sapiens OX=9606 GN=NDUFA3 PE=1 SV=1	-0.216515	8.13899	-1.31952	0.193965	0.768744	-4.72464
sp|Q9UQB3|CTND2_HUMAN	CTNND2	Catenin delta-2 OS=Homo sapiens OX=9606 GN=CTNND2 PE=1 SV=3	0.119603	7.10979	1.31894	0.194157	0.768744	-4.72524
sp|Q5T8D3|ACBD5_HUMAN	ACBD5	Acyl-CoA-binding domain-containing protein 5 OS=Homo sapiens OX=9606 GN=ACBD5 PE=1 SV=1	0.227647	6.95925	1.30528	0.199061	0.772386	-4.72562
sp|Q15751|HERC1_HUMAN	HERC1	Probable E3 ubiquitin-protein ligase HERC1 OS=Homo sapiens OX=9606 GN=HERC1 PE=1 SV=2	-0.17817	6.63301	-1.17308	0.251366	0.81383	-4.72627
sp|O75533|SF3B1_HUMAN	SF3B1	Splicing factor 3B subunit 1 OS=Homo sapiens OX=9606 GN=SF3B1 PE=1 SV=3	-0.161264	6.92883	-1.311	0.196966	0.770729	-4.72649
sp|P04439|HLAA_HUMAN	HLA-A	HLA class I histocompatibility antigen, A alpha chain OS=Homo sapiens OX=9606 GN=HLA-A PE=1 SV=2	-0.17373	8.54433	-1.31774	0.194555	0.768744	-4.7265
sp|Q01082|SPTB2_HUMAN	SPTBN1	Spectrin beta chain, non-erythrocytic 1 OS=Homo sapiens OX=9606 GN=SPTBN1 PE=1 SV=2	0.100105	8.5512	1.31637	0.19501	0.768744	-4.72793
sp|P15924|DESP_HUMAN	DSP	Desmoplakin OS=Homo sapiens OX=9606 GN=DSP PE=1 SV=3	-0.164392	6.89956	-1.30823	0.197896	0.771372	-4.72935
sp|Q9GZY8|MFF_HUMAN	MFF	Mitochondrial fission factor OS=Homo sapiens OX=9606 GN=MFF PE=1 SV=1	-0.171053	7.20116	-1.30756	0.198121	0.771372	-4.73004
sp|Q13308|PTK7_HUMAN	PTK7	Inactive tyrosine-protein kinase 7 OS=Homo sapiens OX=9606 GN=PTK7 PE=1 SV=2	-0.262482	6.73404	-1.29236	0.203635	0.776583	-4.73149
sp|O43776|SYNC_HUMAN	NARS1	Asparagine--tRNA ligase, cytoplasmic OS=Homo sapiens OX=9606 GN=NARS1 PE=1 SV=1	0.155614	7.15994	1.31272	0.196229	0.770591	-4.73174
sp|Q13976|KGP1_HUMAN	PRKG1	cGMP-dependent protein kinase 1 OS=Homo sapiens OX=9606 GN=PRKG1 PE=1 SV=3	-0.174799	6.79675	-1.23537	0.225394	0.788829	-4.73346
sp|P17813|EGLN_HUMAN	ENG	Endoglin OS=Homo sapiens OX=9606 GN=ENG PE=1 SV=2	-0.20295	7.81214	-1.31073	0.196893	0.770729	-4.7338
sp|P09619|PGFRB_HUMAN	PDGFRB	Platelet-derived growth factor receptor beta OS=Homo sapiens OX=9606 GN=PDGFRB PE=1 SV=1	-0.234381	7.58686	-1.31037	0.197014	0.770729	-4.73418
sp|P28072|PSB6_HUMAN	PSMB6	Proteasome subunit beta type-6 OS=Homo sapiens OX=9606 GN=PSMB6 PE=1 SV=4	-0.185331	8.98596	-1.30218	0.199936	0.772386	-4.73558
sp|P04839|CY24B_HUMAN	CYBB	Cytochrome b-245 heavy chain OS=Homo sapiens OX=9606 GN=CYBB PE=1 SV=2	-0.228952	8.40314	-1.30878	0.197548	0.771372	-4.73583
sp|Q9UI15|TAGL3_HUMAN	TAGLN3	Transgelin-3 OS=Homo sapiens OX=9606 GN=TAGLN3 PE=1 SV=2	0.182725	7.36489	1.30854	0.197629	0.771372	-4.73608
sp|Q9HAD4|WDR41_HUMAN	WDR41	WD repeat-containing protein 41 OS=Homo sapiens OX=9606 GN=WDR41 PE=1 SV=3	-0.157291	7.60327	-1.30155	0.200152	0.772386	-4.73624
sp|Q14699|RFTN1_HUMAN	RFTN1	Raftlin OS=Homo sapiens OX=9606 GN=RFTN1 PE=1 SV=4	-0.136862	7.01348	-1.30715	0.198095	0.771372	-4.73752
sp|P30711|GSTT1_HUMAN	GSTT1	Glutathione S-transferase theta-1 OS=Homo sapiens OX=9606 GN=GSTT1 PE=1 SV=4	0.254556	8.30872	1.25489	0.21737	0.784248	-4.73841
sp|Q8TCC7|S22A8_HUMAN	SLC22A8	Organic anion transporter 3 OS=Homo sapiens OX=9606 GN=SLC22A8 PE=1 SV=1	-0.242698	7.08575	-1.21645	0.232689	0.796788	-4.73987
sp|O00562|PITM1_HUMAN	PITPNM1	Membrane-associated phosphatidylinositol transfer protein 1 OS=Homo sapiens OX=9606 GN=PITPNM1 PE=1 SV=4	-0.144042	6.61077	-1.29719	0.201633	0.773274	-4.74071
sp|Q5T1M5|FKB15_HUMAN	FKBP15	FK506-binding protein 15 OS=Homo sapiens OX=9606 GN=FKBP15 PE=1 SV=2	-0.358951	5.56262	-1.16522	0.254092	0.815261	-4.74087
sp|O95299|NDUAA_HUMAN	NDUFA10	NADH dehydrogenase [ubiquinone] 1 alpha subcomplex subunit 10, mitochondrial OS=Homo sapiens OX=9606 GN=NDUFA10 PE=1 SV=1	-0.20661	8.54737	-1.30316	0.199443	0.772386	-4.74166
sp|Q9UQN3|CHM2B_HUMAN	CHMP2B	Charged multivesicular body protein 2b OS=Homo sapiens OX=9606 GN=CHMP2B PE=1 SV=1	0.109366	6.99724	1.28215	0.207155	0.780853	-4.74175
sp|Q9BXP2|S12A9_HUMAN	SLC12A9	Solute carrier family 12 member 9 OS=Homo sapiens OX=9606 GN=SLC12A9 PE=1 SV=1	0.366603	6.02068	1.13328	0.267033	0.826443	-4.7424
sp|P02100|HBE_HUMAN	HBE1	Hemoglobin subunit epsilon OS=Homo sapiens OX=9606 GN=HBE1 PE=1 SV=2	-0.328044	7.19952	-1.29461	0.202514	0.774473	-4.74334
sp|P04275|VWF_HUMAN	VWF	von Willebrand factor OS=Homo sapiens OX=9606 GN=VWF PE=1 SV=4	-0.168025	6.60555	-1.30085	0.200226	0.772386	-4.74404
sp|P10915|HPLN1_HUMAN	HAPLN1	Hyaluronan and proteoglycan link protein 1 OS=Homo sapiens OX=9606 GN=HAPLN1 PE=2 SV=2	0.21545	8.14252	1.30026	0.200425	0.772386	-4.74465
sp|O75355|ENTP3_HUMAN	ENTPD3	Ectonucleoside triphosphate diphosphohydrolase 3 OS=Homo sapiens OX=9606 GN=ENTPD3 PE=1 SV=2	0.133722	6.93097	1.30017	0.200458	0.772386	-4.74475
sp|Q8TCT9|HM13_HUMAN	HM13	Minor histocompatibility antigen H13 OS=Homo sapiens OX=9606 GN=HM13 PE=1 SV=1	-0.191342	7.33688	-1.30014	0.200468	0.772386	-4.74478
sp|P04733|MT1F_HUMAN	MT1F	Metallothionein-1F OS=Homo sapiens OX=9606 GN=MT1F PE=1 SV=1	-0.374548	5.60626	-1.17773	0.248454	0.81334	-4.74478
sp|Q9Y216|MTMR7_HUMAN	MTMR7	Myotubularin-related protein 7 OS=Homo sapiens OX=9606 GN=MTMR7 PE=1 SV=3	0.25815	6.28791	1.12897	0.269595	0.827098	-4.7449
sp|Q96Q05|TPPC9_HUMAN	TRAPPC9	Trafficking protein particle complex subunit 9 OS=Homo sapiens OX=9606 GN=TRAPPC9 PE=1 SV=2	0.0897716	6.81681	1.29882	0.200915	0.772386	-4.74614
sp|P30825|CTR1_HUMAN	SLC7A1	High affinity cationic amino acid transporter 1 OS=Homo sapiens OX=9606 GN=SLC7A1 PE=1 SV=1	-0.216831	8.01478	-1.29844	0.201046	0.772386	-4.74653
sp|Q7RTP6|MICA3_HUMAN	MICAL3	[F-actin]-monooxygenase MICAL3 OS=Homo sapiens OX=9606 GN=MICAL3 PE=1 SV=2	0.125799	6.90785	1.29815	0.201143	0.772386	-4.74683
sp|P48058|GRIA4_HUMAN	GRIA4	Glutamate receptor 4 OS=Homo sapiens OX=9606 GN=GRIA4 PE=1 SV=2	0.208786	7.11647	1.12473	0.271353	0.831119	-4.74814
sp|Q6ZWB6|KCTD8_HUMAN	KCTD8	BTB/POZ domain-containing protein KCTD8 OS=Homo sapiens OX=9606 GN=KCTD8 PE=1 SV=1	0.159677	7.94569	1.29548	0.202054	0.773458	-4.74957
sp|P10155|RO60_HUMAN	RO60	RNA-binding protein RO60 OS=Homo sapiens OX=9606 GN=RO60 PE=1 SV=2	0.166225	6.7707	1.28751	0.204952	0.777983	-4.75058
sp|P23381|SYWC_HUMAN	WARS1	Tryptophan--tRNA ligase, cytoplasmic OS=Homo sapiens OX=9606 GN=WARS1 PE=1 SV=2	0.150828	7.29371	1.29297	0.202912	0.775156	-4.75215
sp|Q9H254|SPTN4_HUMAN	SPTBN4	Spectrin beta chain, non-erythrocytic 4 OS=Homo sapiens OX=9606 GN=SPTBN4 PE=1 SV=2	0.126825	6.93519	1.29251	0.203071	0.775156	-4.75263
sp|Q8N1S5|S39AB_HUMAN	SLC39A11	Zinc transporter ZIP11 OS=Homo sapiens OX=9606 GN=SLC39A11 PE=2 SV=3	-0.219814	7.11001	-1.24732	0.2201	0.786715	-4.75377
sp|O14979|HNRDL_HUMAN	HNRNPDL	Heterogeneous nuclear ribonucleoprotein D-like OS=Homo sapiens OX=9606 GN=HNRNPDL PE=1 SV=3	-0.19901	7.89069	-1.2837	0.206273	0.780099	-4.75446
tr|A0A087X1V2|A0A087X1V2_HUMAN	NCAM1	Neural cell adhesion molecule 1 (Fragment) OS=Homo sapiens OX=9606 GN=NCAM1 PE=1 SV=6	-0.20838	8.53192	-1.28946	0.204118	0.777123	-4.75575
sp|P48547|KCNC1_HUMAN	KCNC1	Potassium voltage-gated channel subfamily C member 1 OS=Homo sapiens OX=9606 GN=KCNC1 PE=1 SV=1	0.177517	7.18126	1.21862	0.231122	0.793738	-4.756
sp|P68402|PA1B2_HUMAN	PAFAH1B2	Platelet-activating factor acetylhydrolase IB subunit alpha2 OS=Homo sapiens OX=9606 GN=PAFAH1B2 PE=1 SV=1	0.194551	8.20605	1.28888	0.204318	0.777123	-4.75635
sp|Q16836|HCDH_HUMAN	HADH	Hydroxyacyl-coenzyme A dehydrogenase, mitochondrial OS=Homo sapiens OX=9606 GN=HADH PE=1 SV=3	0.19461	8.07122	1.2888	0.204346	0.777123	-4.75643
sp|Q14008|CKAP5_HUMAN	CKAP5	Cytoskeleton-associated protein 5 OS=Homo sapiens OX=9606 GN=CKAP5 PE=1 SV=3	0.0799027	7.29019	1.28817	0.204565	0.777231	-4.75708
sp|Q9NQ88|TIGAR_HUMAN	TIGAR	Fructose-2,6-bisphosphatase TIGAR OS=Homo sapiens OX=9606 GN=TIGAR PE=1 SV=1	-0.202463	6.52402	-1.14684	0.26049	0.821336	-4.75764
sp|Q9Y289|SC5A6_HUMAN	SLC5A6	Sodium-dependent multivitamin transporter OS=Homo sapiens OX=9606 GN=SLC5A6 PE=1 SV=2	0.38574	5.53315	1.13425	0.266279	0.826099	-4.75838
sp|P67812|SC11A_HUMAN	SEC11A	Signal peptidase complex catalytic subunit SEC11A OS=Homo sapiens OX=9606 GN=SEC11A PE=1 SV=1	-0.213386	7.84977	-1.27983	0.207617	0.780853	-4.75838
sp|Q12907|LMAN2_HUMAN	LMAN2	Vesicular integral-membrane protein VIP36 OS=Homo sapiens OX=9606 GN=LMAN2 PE=1 SV=1	-0.168122	8.39043	-1.2864	0.205174	0.778046	-4.75888
sp|O60518|RNBP6_HUMAN	RANBP6	Ran-binding protein 6 OS=Homo sapiens OX=9606 GN=RANBP6 PE=1 SV=2	0.142151	6.65819	1.2791	0.20787	0.780976	-4.75911
sp|Q8N3R9|PALS1_HUMAN	PALS1	Protein PALS1 OS=Homo sapiens OX=9606 GN=PALS1 PE=1 SV=3	0.226681	6.01754	1.14207	0.263424	0.825158	-4.75963
sp|P09525|ANXA4_HUMAN	ANXA4	Annexin A4 OS=Homo sapiens OX=9606 GN=ANXA4 PE=1 SV=4	-0.203474	8.3751	-1.28216	0.206644	0.780784	-4.76322
sp|Q9BRT2|UQCC2_HUMAN	UQCC2	Ubiquinol-cytochrome-c reductase complex assembly factor 2 OS=Homo sapiens OX=9606 GN=UQCC2 PE=1 SV=1	0.263811	6.71206	1.1695	0.251388	0.81383	-4.76328
sp|P61952|GBG11_HUMAN	GNG11	Guanine nucleotide-binding protein G(I)/G(S)/G(O) subunit gamma-11 OS=Homo sapiens OX=9606 GN=GNG11 PE=1 SV=1	-0.179629	7.1827	-1.27392	0.209684	0.780976	-4.76435
sp|P07954|FUMH_HUMAN	FH	Fumarate hydratase, mitochondrial OS=Homo sapiens OX=9606 GN=FH PE=1 SV=3	0.169643	8.04002	1.28029	0.207295	0.780853	-4.76512
sp|Q9BWH2|FUND2_HUMAN	FUNDC2	FUN14 domain-containing protein 2 OS=Homo sapiens OX=9606 GN=FUNDC2 PE=1 SV=2	-0.125755	7.92251	-1.27962	0.207528	0.780853	-4.7658
sp|P32942|ICAM3_HUMAN	ICAM3	Intercellular adhesion molecule 3 OS=Homo sapiens OX=9606 GN=ICAM3 PE=1 SV=2	0.318495	6.90499	1.19973	0.238768	0.803444	-4.76583
sp|Q9UKG1|DP13A_HUMAN	APPL1	DCC-interacting protein 13-alpha OS=Homo sapiens OX=9606 GN=APPL1 PE=1 SV=1	-0.0806864	7.3594	-1.27718	0.208381	0.780976	-4.76828
sp|Q96JH7|VCIP1_HUMAN	VCPIP1	Deubiquitinating protein VCPIP1 OS=Homo sapiens OX=9606 GN=VCPIP1 PE=1 SV=2	0.131973	6.15077	1.27712	0.208402	0.780976	-4.76834
sp|Q8N668|COMD1_HUMAN	COMMD1	COMM domain-containing protein 1 OS=Homo sapiens OX=9606 GN=COMMD1 PE=1 SV=1	-0.202526	5.95196	-1.2229	0.229294	0.791791	-4.76884
sp|Q8N5S9|KKCC1_HUMAN	CAMKK1	Calcium/calmodulin-dependent protein kinase kinase 1 OS=Homo sapiens OX=9606 GN=CAMKK1 PE=1 SV=2	-0.123879	7.39701	-1.27637	0.208662	0.780976	-4.7691
sp|O15498|YKT6_HUMAN	YKT6	Synaptobrevin homolog YKT6 OS=Homo sapiens OX=9606 GN=YKT6 PE=1 SV=1	-0.129172	7.92586	-1.27598	0.208799	0.780976	-4.76949
sp|P05230|FGF1_HUMAN	FGF1	Fibroblast growth factor 1 OS=Homo sapiens OX=9606 GN=FGF1 PE=1 SV=1	0.225118	8.88165	1.26877	0.211497	0.782502	-4.76952
sp|Q96EK5|KBP_HUMAN	KIFBP	KIF-binding protein OS=Homo sapiens OX=9606 GN=KIFBP PE=1 SV=1	0.0983121	7.25435	1.2752	0.209073	0.780976	-4.77029
sp|Q9NRK6|ABCBA_HUMAN	ABCB10	ATP-binding cassette sub-family B member 10, mitochondrial OS=Homo sapiens OX=9606 GN=ABCB10 PE=1 SV=2	0.254771	6.38407	1.15123	0.259015	0.81908	-4.7711
sp|Q9Y376|CAB39_HUMAN	CAB39	Calcium-binding protein 39 OS=Homo sapiens OX=9606 GN=CAB39 PE=1 SV=1	0.134652	7.49739	1.27387	0.209538	0.780976	-4.77163
sp|Q8N183|NDUF2_HUMAN	NDUFAF2	NADH dehydrogenase [ubiquinone] 1 alpha subcomplex assembly factor 2 OS=Homo sapiens OX=9606 GN=NDUFAF2 PE=1 SV=1	-0.225638	6.05021	-1.22817	0.227122	0.78895	-4.77199
sp|Q9NUT2|MITOS_HUMAN	ABCB8	Mitochondrial potassium channel ATP-binding subunit OS=Homo sapiens OX=9606 GN=ABCB8 PE=1 SV=3	-0.159863	7.76925	-1.27113	0.210502	0.780976	-4.77441
sp|Q9HC56|PCDH9_HUMAN	PCDH9	Protocadherin-9 OS=Homo sapiens OX=9606 GN=PCDH9 PE=1 SV=2	0.135485	7.36672	1.2711	0.210515	0.780976	-4.77444
sp|Q9BTV4|TMM43_HUMAN	TMEM43	Transmembrane protein 43 OS=Homo sapiens OX=9606 GN=TMEM43 PE=1 SV=1	-0.170576	7.82961	-1.27102	0.21054	0.780976	-4.77451
sp|Q9H6V9|LDAH_HUMAN	LDAH	Lipid droplet-associated hydrolase OS=Homo sapiens OX=9606 GN=LDAH PE=1 SV=1	-0.268012	5.9365	-1.26375	0.213276	0.783575	-4.77455
sp|Q8N6T3|ARFG1_HUMAN	ARFGAP1	ADP-ribosylation factor GTPase-activating protein 1 OS=Homo sapiens OX=9606 GN=ARFGAP1 PE=1 SV=2	-0.172635	7.13286	-1.27065	0.210673	0.780976	-4.77489
sp|Q9Y5K5|UCHL5_HUMAN	UCHL5	Ubiquitin carboxyl-terminal hydrolase isozyme L5 OS=Homo sapiens OX=9606 GN=UCHL5 PE=1 SV=3	-0.140725	7.12684	-1.27064	0.210676	0.780976	-4.7749
sp|P13797|PLST_HUMAN	PLS3	Plastin-3 OS=Homo sapiens OX=9606 GN=PLS3 PE=1 SV=4	0.132053	6.96216	1.27032	0.210788	0.780976	-4.77522
sp|P32856|STX2_HUMAN	STX2	Syntaxin-2 OS=Homo sapiens OX=9606 GN=STX2 PE=1 SV=3	-0.1354	7.27663	-1.26726	0.21187	0.782832	-4.77831
sp|P78357|CNTP1_HUMAN	CNTNAP1	Contactin-associated protein 1 OS=Homo sapiens OX=9606 GN=CNTNAP1 PE=1 SV=1	0.178108	8.99549	1.26698	0.211969	0.782832	-4.7786
sp|Q12974|TP4A2_HUMAN	PTP4A2	Protein tyrosine phosphatase type IVA 2 OS=Homo sapiens OX=9606 GN=PTP4A2 PE=1 SV=1	-0.113932	6.94767	-1.26632	0.212202	0.782887	-4.77926
sp|Q63HN8|RN213_HUMAN	RNF213	E3 ubiquitin-protein ligase RNF213 OS=Homo sapiens OX=9606 GN=RNF213 PE=1 SV=3	0.12504	6.79907	1.2355	0.224022	0.788829	-4.77954
sp|Q13671|RIN1_HUMAN	RIN1	Ras and Rab interactor 1 OS=Homo sapiens OX=9606 GN=RIN1 PE=1 SV=4	-0.148817	6.8067	-1.24982	0.21844	0.785277	-4.78056
sp|Q8N2K0|ABD12_HUMAN	ABHD12	Lysophosphatidylserine lipase ABHD12 OS=Homo sapiens OX=9606 GN=ABHD12 PE=1 SV=2	0.149005	7.57294	1.26421	0.212951	0.783575	-4.78138
sp|Q92599|SEPT8_HUMAN	SEPTIN8	Septin-8 OS=Homo sapiens OX=9606 GN=SEPTIN8 PE=1 SV=4	0.151492	8.59741	1.26349	0.213209	0.783575	-4.78211
sp|O75379|VAMP4_HUMAN	VAMP4	Vesicle-associated membrane protein 4 OS=Homo sapiens OX=9606 GN=VAMP4 PE=1 SV=2	0.231523	6.46235	1.25602	0.216038	0.784248	-4.78226
sp|Q9BY11|PACN1_HUMAN	PACSIN1	Protein kinase C and casein kinase substrate in neurons protein 1 OS=Homo sapiens OX=9606 GN=PACSIN1 PE=1 SV=1	-0.196441	10.2332	-1.2628	0.213453	0.783575	-4.7828
sp|O14639|ABLM1_HUMAN	ABLIM1	Actin-binding LIM protein 1 OS=Homo sapiens OX=9606 GN=ABLIM1 PE=1 SV=3	0.127814	7.01931	1.26222	0.21366	0.783575	-4.78339
sp|P13861|KAP2_HUMAN	PRKAR2A	cAMP-dependent protein kinase type II-alpha regulatory subunit OS=Homo sapiens OX=9606 GN=PRKAR2A PE=1 SV=2	-0.128315	7.87558	-1.2621	0.213702	0.783575	-4.78351
sp|P62079|TSN5_HUMAN	TSPAN5	Tetraspanin-5 OS=Homo sapiens OX=9606 GN=TSPAN5 PE=1 SV=1	-0.157668	6.34976	-1.23094	0.225703	0.788829	-4.78392
sp|A6NE02|BTBDH_HUMAN	BTBD17	BTB/POZ domain-containing protein 17 OS=Homo sapiens OX=9606 GN=BTBD17 PE=3 SV=1	-0.241502	6.50384	-1.22353	0.228647	0.791791	-4.78393
sp|Q16864|VATF_HUMAN	ATP6V1F	V-type proton ATPase subunit F OS=Homo sapiens OX=9606 GN=ATP6V1F PE=1 SV=2	0.229621	9.03084	1.26116	0.214038	0.784105	-4.78445
sp|Q08380|LG3BP_HUMAN	LGALS3BP	Galectin-3-binding protein OS=Homo sapiens OX=9606 GN=LGALS3BP PE=1 SV=1	-0.146972	6.98967	-1.25929	0.214707	0.784248	-4.78633
sp|P49915|GUAA_HUMAN	GMPS	GMP synthase [glutamine-hydrolyzing] OS=Homo sapiens OX=9606 GN=GMPS PE=1 SV=1	0.109063	6.95394	1.25902	0.214802	0.784248	-4.7866
sp|P30622|CLIP1_HUMAN	CLIP1	CAP-Gly domain-containing linker protein 1 OS=Homo sapiens OX=9606 GN=CLIP1 PE=1 SV=2	0.173701	6.25491	1.2202	0.229891	0.792665	-4.78708
sp|Q16799|RTN1_HUMAN	RTN1	Reticulon-1 OS=Homo sapiens OX=9606 GN=RTN1 PE=1 SV=1	0.132581	7.87277	1.25819	0.215099	0.784248	-4.78743
sp|Q8TDW0|LRC8C_HUMAN	LRRC8C	Volume-regulated anion channel subunit LRRC8C OS=Homo sapiens OX=9606 GN=LRRC8C PE=1 SV=2	-0.163044	6.69829	-1.2424	0.221133	0.787534	-4.78783
sp|Q4KMP7|TB10B_HUMAN	TBC1D10B	TBC1 domain family member 10B OS=Homo sapiens OX=9606 GN=TBC1D10B PE=1 SV=3	-0.22202	6.70626	-1.23531	0.223909	0.788829	-4.78789
sp|Q9BVC6|TM109_HUMAN	TMEM109	Transmembrane protein 109 OS=Homo sapiens OX=9606 GN=TMEM109 PE=1 SV=1	0.229676	8.0514	1.25722	0.215449	0.784248	-4.7884
sp|O95466|FMNL1_HUMAN	FMNL1	Formin-like protein 1 OS=Homo sapiens OX=9606 GN=FMNL1 PE=1 SV=3	-0.1899	6.85837	-1.21544	0.231681	0.794321	-4.7898
sp|Q6P4E1|GOLM2_HUMAN	GOLM2	Protein GOLM2 OS=Homo sapiens OX=9606 GN=GOLM2 PE=1 SV=2	-0.159435	7.04357	-1.25545	0.216082	0.784248	-4.79017
sp|O75935|DCTN3_HUMAN	DCTN3	Dynactin subunit 3 OS=Homo sapiens OX=9606 GN=DCTN3 PE=1 SV=1	-0.154058	7.77849	-1.24726	0.219199	0.786715	-4.79094
sp|P54750|PDE1A_HUMAN	PDE1A	Dual specificity calcium/calmodulin-dependent 3',5'-cyclic nucleotide phosphodiesterase 1A OS=Homo sapiens OX=9606 GN=PDE1A PE=1 SV=2	0.113552	7.87931	1.25437	0.216471	0.784248	-4.79125
sp|Q9H1C7|CYTM1_HUMAN	CYSTM1	Cysteine-rich and transmembrane domain-containing protein 1 OS=Homo sapiens OX=9606 GN=CYSTM1 PE=1 SV=1	-0.140381	8.25367	-1.25422	0.216526	0.784248	-4.7914
sp|Q99829|CPNE1_HUMAN	CPNE1	Copine-1 OS=Homo sapiens OX=9606 GN=CPNE1 PE=1 SV=1	-0.193113	7.81346	-1.25375	0.216695	0.784248	-4.79187
sp|O00487|PSDE_HUMAN	PSMD14	26S proteasome non-ATPase regulatory subunit 14 OS=Homo sapiens OX=9606 GN=PSMD14 PE=1 SV=1	0.130126	7.80549	1.25332	0.216847	0.784248	-4.79229
sp|Q13526|PIN1_HUMAN	PIN1	Peptidyl-prolyl cis-trans isomerase NIMA-interacting 1 OS=Homo sapiens OX=9606 GN=PIN1 PE=1 SV=1	0.139228	7.52021	1.25326	0.21687	0.784248	-4.79236
sp|Q96FL8|S47A1_HUMAN	SLC47A1	Multidrug and toxin extrusion protein 1 OS=Homo sapiens OX=9606 GN=SLC47A1 PE=1 SV=1	-0.281727	6.66255	-1.17841	0.246795	0.811152	-4.793
sp|Q96Q42|ALS2_HUMAN	ALS2	Alsin OS=Homo sapiens OX=9606 GN=ALS2 PE=1 SV=2	-0.145034	6.68932	-1.23702	0.223106	0.788829	-4.79309
sp|Q8IUR7|ARMC8_HUMAN	ARMC8	Armadillo repeat-containing protein 8 OS=Homo sapiens OX=9606 GN=ARMC8 PE=1 SV=2	0.148552	7.08372	1.25163	0.217459	0.784248	-4.79399
sp|O15511|ARPC5_HUMAN	ARPC5	Actin-related protein 2/3 complex subunit 5 OS=Homo sapiens OX=9606 GN=ARPC5 PE=1 SV=3	-0.15067	7.56595	-1.24342	0.220596	0.786715	-4.79473
sp|P04233|HG2A_HUMAN	CD74	HLA class II histocompatibility antigen gamma chain OS=Homo sapiens OX=9606 GN=CD74 PE=1 SV=3	0.207595	7.82971	1.23609	0.223446	0.788829	-4.79477
sp|Q8TDZ2|MICA1_HUMAN	MICAL1	[F-actin]-monooxygenase MICAL1 OS=Homo sapiens OX=9606 GN=MICAL1 PE=1 SV=2	-0.160946	6.69268	-1.24333	0.220631	0.786715	-4.79483
sp|Q9H2V7|SPNS1_HUMAN	SPNS1	Protein spinster homolog 1 OS=Homo sapiens OX=9606 GN=SPNS1 PE=1 SV=1	0.222265	7.80324	1.24311	0.220711	0.786715	-4.79504
sp|P07305|H10_HUMAN	H1-0	Histone H1.0 OS=Homo sapiens OX=9606 GN=H1-0 PE=1 SV=3	-0.287514	8.06275	-1.25048	0.217874	0.784248	-4.79513
sp|P46060|RAGP1_HUMAN	RANGAP1	Ran GTPase-activating protein 1 OS=Homo sapiens OX=9606 GN=RANGAP1 PE=1 SV=1	0.144434	6.80025	1.2504	0.217904	0.784248	-4.79521
sp|Q92736|RYR2_HUMAN	RYR2	Ryanodine receptor 2 OS=Homo sapiens OX=9606 GN=RYR2 PE=1 SV=3	0.15913	7.04155	1.25038	0.21791	0.784248	-4.79523
sp|Q16816|PHKG1_HUMAN	PHKG1	Phosphorylase b kinase gamma catalytic chain, skeletal muscle/heart isoform OS=Homo sapiens OX=9606 GN=PHKG1 PE=2 SV=3	-0.167495	7.60889	-1.14406	0.261334	0.821336	-4.7968
sp|P08575|PTPRC_HUMAN	PTPRC	Receptor-type tyrosine-protein phosphatase C OS=Homo sapiens OX=9606 GN=PTPRC PE=1 SV=3	-0.177091	7.80959	-1.24853	0.21858	0.785277	-4.79707
sp|Q9H8M5|CNNM2_HUMAN	CNNM2	Metal transporter CNNM2 OS=Homo sapiens OX=9606 GN=CNNM2 PE=1 SV=2	0.160075	7.25095	1.19849	0.238332	0.803444	-4.79879
sp|Q99798|ACON_HUMAN	ACO2	Aconitate hydratase, mitochondrial OS=Homo sapiens OX=9606 GN=ACO2 PE=1 SV=2	0.189407	8.35043	1.24593	0.219522	0.786715	-4.79965
sp|Q92911|SC5A5_HUMAN	SLC5A5	Sodium/iodide cotransporter OS=Homo sapiens OX=9606 GN=SLC5A5 PE=1 SV=1	-0.391268	7.5466	-1.15846	0.25497	0.815261	-4.80108
sp|P23246|SFPQ_HUMAN	SFPQ	Splicing factor, proline- and glutamine-rich OS=Homo sapiens OX=9606 GN=SFPQ PE=1 SV=2	0.13524	7.27951	1.24341	0.22044	0.786715	-4.80215
sp|P20338|RAB4A_HUMAN	RAB4A	Ras-related protein Rab-4A OS=Homo sapiens OX=9606 GN=RAB4A PE=1 SV=3	0.163361	7.39865	1.24287	0.220639	0.786715	-4.80269
sp|Q15738|NSDHL_HUMAN	NSDHL	Sterol-4-alpha-carboxylate 3-dehydrogenase, decarboxylating OS=Homo sapiens OX=9606 GN=NSDHL PE=1 SV=2	-0.20266	7.07733	-1.23464	0.223814	0.788829	-4.80335
tr|E9PMV2|E9PMV2_HUMAN	HLA-DQA1	Major histocompatibility complex, class II, DQ alpha 1 (Fragment) OS=Homo sapiens OX=9606 GN=HLA-DQA1 PE=1 SV=1	0.302668	7.52156	1.02546	0.315775	0.846183	-4.80426
sp|P28845|DHI1_HUMAN	HSD11B1	11-beta-hydroxysteroid dehydrogenase 1 OS=Homo sapiens OX=9606 GN=HSD11B1 PE=1 SV=3	-0.264538	6.60031	-1.20052	0.237351	0.802678	-4.80555
sp|Q92538|GBF1_HUMAN	GBF1	Golgi-specific brefeldin A-resistance guanine nucleotide exchange factor 1 OS=Homo sapiens OX=9606 GN=GBF1 PE=1 SV=2	-0.232332	6.49608	-1.14108	0.262283	0.823054	-4.80557
sp|Q8NDA8|MROH1_HUMAN	MROH1	Maestro heat-like repeat-containing protein family member 1 OS=Homo sapiens OX=9606 GN=MROH1 PE=2 SV=3	-0.13759	7.14683	-1.23944	0.221891	0.788829	-4.80608
sp|Q96N67|DOCK7_HUMAN	DOCK7	Dedicator of cytokinesis protein 7 OS=Homo sapiens OX=9606 GN=DOCK7 PE=1 SV=4	-0.124587	7.35158	-1.19149	0.241033	0.805148	-4.80617
sp|Q16891|MIC60_HUMAN	IMMT	MICOS complex subunit MIC60 OS=Homo sapiens OX=9606 GN=IMMT PE=1 SV=1	-0.157134	7.93039	-1.23832	0.222305	0.788829	-4.80719
sp|Q6SZW1|SARM1_HUMAN	SARM1	NAD(+) hydrolase SARM1 OS=Homo sapiens OX=9606 GN=SARM1 PE=1 SV=1	0.150079	6.22359	1.10611	0.277748	0.835395	-4.80784
sp|Q9UBW8|CSN7A_HUMAN	COPS7A	COP9 signalosome complex subunit 7a OS=Homo sapiens OX=9606 GN=COPS7A PE=1 SV=1	0.103077	7.31275	1.23436	0.223758	0.788829	-4.81109
sp|P24666|PPAC_HUMAN	ACP1	Low molecular weight phosphotyrosine protein phosphatase OS=Homo sapiens OX=9606 GN=ACP1 PE=1 SV=3	-0.14484	7.18956	-1.23393	0.223917	0.788829	-4.81151
sp|Q15293|RCN1_HUMAN	RCN1	Reticulocalbin-1 OS=Homo sapiens OX=9606 GN=RCN1 PE=1 SV=1	-0.234438	8.36195	-1.23371	0.224	0.788829	-4.81173
sp|Q15172|2A5A_HUMAN	PPP2R5A	Serine/threonine-protein phosphatase 2A 56 kDa regulatory subunit alpha isoform OS=Homo sapiens OX=9606 GN=PPP2R5A PE=1 SV=1	0.119324	6.59624	1.19153	0.240819	0.805148	-4.81209
sp|Q9P2R7|SUCB1_HUMAN	SUCLA2	Succinate--CoA ligase [ADP-forming] subunit beta, mitochondrial OS=Homo sapiens OX=9606 GN=SUCLA2 PE=1 SV=3	0.14614	8.70909	1.23291	0.224294	0.788829	-4.81251
sp|Q8IYB5|SMAP1_HUMAN	SMAP1	Stromal membrane-associated protein 1 OS=Homo sapiens OX=9606 GN=SMAP1 PE=1 SV=2	0.124721	7.7063	1.23277	0.224347	0.788829	-4.81265
sp|P07225|PROS_HUMAN	PROS1	Vitamin K-dependent protein S OS=Homo sapiens OX=9606 GN=PROS1 PE=1 SV=1	-0.308747	7.38598	-1.23147	0.224826	0.788829	-4.81393
sp|P15882|CHIN_HUMAN	CHN1	N-chimaerin OS=Homo sapiens OX=9606 GN=CHN1 PE=1 SV=3	0.256717	6.39744	1.17138	0.249124	0.813581	-4.81404
sp|P48065|S6A12_HUMAN	SLC6A12	Sodium- and chloride-dependent betaine transporter OS=Homo sapiens OX=9606 GN=SLC6A12 PE=1 SV=2	-0.182739	7.7895	-1.23127	0.224901	0.788829	-4.81413
sp|P05107|ITB2_HUMAN	ITGB2	Integrin beta-2 OS=Homo sapiens OX=9606 GN=ITGB2 PE=1 SV=2	-0.187735	8.92905	-1.22955	0.225539	0.788829	-4.81582
sp|O15372|EIF3H_HUMAN	EIF3H	Eukaryotic translation initiation factor 3 subunit H OS=Homo sapiens OX=9606 GN=EIF3H PE=1 SV=1	-0.0915841	7.36957	-1.22895	0.225763	0.788829	-4.81641
sp|P20472|PRVA_HUMAN	PVALB	Parvalbumin alpha OS=Homo sapiens OX=9606 GN=PVALB PE=1 SV=2	-0.259439	6.4988	-1.0938	0.28245	0.836666	-4.81659
sp|Q68DH5|LMBD2_HUMAN	LMBRD2	G-protein coupled receptor-associated protein LMBRD2 OS=Homo sapiens OX=9606 GN=LMBRD2 PE=1 SV=1	-0.217893	7.63097	-1.22862	0.225884	0.788829	-4.81673
sp|P60953|CDC42_HUMAN	CDC42	Cell division control protein 42 homolog OS=Homo sapiens OX=9606 GN=CDC42 PE=1 SV=2	-0.108104	9.79893	-1.22858	0.225899	0.788829	-4.81677
sp|Q8NFP9|NBEA_HUMAN	NBEA	Neurobeachin OS=Homo sapiens OX=9606 GN=NBEA PE=1 SV=3	0.135297	7.26739	1.22747	0.226312	0.788829	-4.81786
sp|Q9H008|LHPP_HUMAN	LHPP	Phospholysine phosphohistidine inorganic pyrophosphate phosphatase OS=Homo sapiens OX=9606 GN=LHPP PE=1 SV=2	-0.177519	7.44596	-1.22718	0.226421	0.788829	-4.81814
sp|O15143|ARC1B_HUMAN	ARPC1B	Actin-related protein 2/3 complex subunit 1B OS=Homo sapiens OX=9606 GN=ARPC1B PE=1 SV=3	-0.139175	7.3208	-1.22705	0.226467	0.788829	-4.81826
sp|Q9NQ48|LZTL1_HUMAN	LZTFL1	Leucine zipper transcription factor-like protein 1 OS=Homo sapiens OX=9606 GN=LZTFL1 PE=1 SV=1	0.1048	7.14436	1.22694	0.226509	0.788829	-4.81837
tr|F5H459|F5H459_HUMAN	AP3S1	AP complex subunit sigma OS=Homo sapiens OX=9606 GN=AP3S1 PE=1 SV=1	-0.23603	9.06344	-1.20286	0.236089	0.800766	-4.81893
sp|O96011|PX11B_HUMAN	PEX11B	Peroxisomal membrane protein 11B OS=Homo sapiens OX=9606 GN=PEX11B PE=1 SV=1	0.125767	7.00328	1.22622	0.226778	0.78895	-4.81908
sp|O43402|EMC8_HUMAN	EMC8	ER membrane protein complex subunit 8 OS=Homo sapiens OX=9606 GN=EMC8 PE=1 SV=1	-0.187618	7.35323	-1.16761	0.250624	0.81383	-4.81942
sp|O14936|CSKP_HUMAN	CASK	Peripheral plasma membrane protein CASK OS=Homo sapiens OX=9606 GN=CASK PE=1 SV=3	0.0985101	7.2739	1.22554	0.227031	0.78895	-4.81975
sp|O15239|NDUA1_HUMAN	NDUFA1	NADH dehydrogenase [ubiquinone] 1 alpha subcomplex subunit 1 OS=Homo sapiens OX=9606 GN=NDUFA1 PE=1 SV=1	0.309055	7.1614	0.97288	0.3407	0.856139	-4.8203
sp|P26599|PTBP1_HUMAN	PTBP1	Polypyrimidine tract-binding protein 1 OS=Homo sapiens OX=9606 GN=PTBP1 PE=1 SV=2	-0.153906	7.04283	-1.21682	0.230455	0.793121	-4.82069
sp|Q14542|S29A2_HUMAN	SLC29A2	Equilibrative nucleoside transporter 2 OS=Homo sapiens OX=9606 GN=SLC29A2 PE=1 SV=3	-0.260521	5.6596	-1.11378	0.273915	0.832735	-4.82071
sp|P03928|ATP8_HUMAN	MT-ATP8	ATP synthase protein 8 OS=Homo sapiens OX=9606 GN=MT-ATP8 PE=1 SV=1	-0.157216	8.01103	-1.22445	0.227438	0.789376	-4.82081
sp|Q9BZG1|RAB34_HUMAN	RAB34	Ras-related protein Rab-34 OS=Homo sapiens OX=9606 GN=RAB34 PE=1 SV=1	-0.177009	6.51936	-1.0829	0.287751	0.836666	-4.82171
sp|Q9HCD6|TANC2_HUMAN	TANC2	Protein TANC2 OS=Homo sapiens OX=9606 GN=TANC2 PE=1 SV=3	0.113686	6.88043	1.22227	0.228251	0.791527	-4.82293
sp|P02675|FIBB_HUMAN	FGB	Fibrinogen beta chain OS=Homo sapiens OX=9606 GN=FGB PE=1 SV=2	-0.293822	8.31106	-1.22066	0.228854	0.791791	-4.8245
tr|A0A8V8TQK7|A0A8V8TQK7_HUMAN	CLTC	Clathrin heavy chain (Fragment) OS=Homo sapiens OX=9606 GN=CLTC PE=1 SV=1	0.28247	9.02461	1.18791	0.242038	0.80653	-4.8245
sp|Q8IZS8|CA2D3_HUMAN	CACNA2D3	Voltage-dependent calcium channel subunit alpha-2/delta-3 OS=Homo sapiens OX=9606 GN=CACNA2D3 PE=1 SV=1	-0.115058	6.79706	-1.21997	0.229113	0.791791	-4.82518
sp|Q9NZN4|EHD2_HUMAN	EHD2	EH domain-containing protein 2 OS=Homo sapiens OX=9606 GN=EHD2 PE=1 SV=2	-0.141525	7.65919	-1.21964	0.229238	0.791791	-4.8255
sp|P24557|THAS_HUMAN	TBXAS1	Thromboxane-A synthase OS=Homo sapiens OX=9606 GN=TBXAS1 PE=1 SV=3	0.21339	7.19203	1.2177	0.229967	0.792665	-4.82739
sp|P51790|CLCN3_HUMAN	CLCN3	H(+)/Cl(-) exchange transporter 3 OS=Homo sapiens OX=9606 GN=CLCN3 PE=1 SV=2	-0.150883	7.52053	-1.20949	0.233226	0.797293	-4.82775
sp|Q03001|DYST_HUMAN	DST	Dystonin OS=Homo sapiens OX=9606 GN=DST PE=1 SV=4	0.0822492	6.66331	1.21727	0.230129	0.792665	-4.8278
sp|Q13310|PABP4_HUMAN	PABPC4	Polyadenylate-binding protein 4 OS=Homo sapiens OX=9606 GN=PABPC4 PE=1 SV=1	-0.154063	6.99022	-1.15792	0.254503	0.815261	-4.82806
tr|A0A087WUF9|A0A087WUF9_HUMAN	SLC1A7	Amino acid transporter OS=Homo sapiens OX=9606 GN=SLC1A7 PE=1 SV=1	-0.502151	8.20981	-1.17498	0.2473	0.811508	-4.82911
sp|O15488|GLYG2_HUMAN	GYG2	Glycogenin-2 OS=Homo sapiens OX=9606 GN=GYG2 PE=1 SV=2	-0.167063	7.20437	-1.06346	0.296633	0.838616	-4.82916
sp|Q5VW38|GP107_HUMAN	GPR107	Protein GPR107 OS=Homo sapiens OX=9606 GN=GPR107 PE=1 SV=1	-0.177534	8.24768	-1.21518	0.230917	0.793738	-4.82983
sp|Q92900|RENT1_HUMAN	UPF1	Regulator of nonsense transcripts 1 OS=Homo sapiens OX=9606 GN=UPF1 PE=1 SV=2	0.0776043	7.39642	1.21438	0.231216	0.793738	-4.8306
sp|Q5T4B2|GT253_HUMAN	CERCAM	Inactive glycosyltransferase 25 family member 3 OS=Homo sapiens OX=9606 GN=CERCAM PE=1 SV=1	-0.388575	7.81778	-1.0321	0.311501	0.846183	-4.831
sp|P16112|PGCA_HUMAN	ACAN	Aggrecan core protein OS=Homo sapiens OX=9606 GN=ACAN PE=1 SV=3	0.290691	7.42405	1.2059	0.234594	0.7993	-4.83119
sp|Q9UGQ3|GTR6_HUMAN	SLC2A6	Solute carrier family 2, facilitated glucose transporter member 6 OS=Homo sapiens OX=9606 GN=SLC2A6 PE=1 SV=2	-0.174207	6.28847	-1.05994	0.298204	0.839539	-4.83184
sp|P52272|HNRPM_HUMAN	HNRNPM	Heterogeneous nuclear ribonucleoprotein M OS=Homo sapiens OX=9606 GN=HNRNPM PE=1 SV=3	-0.201992	7.32887	-1.21291	0.231774	0.794321	-4.83203
sp|Q14644|RASA3_HUMAN	RASA3	Ras GTPase-activating protein 3 OS=Homo sapiens OX=9606 GN=RASA3 PE=1 SV=3	0.160151	6.2058	1.13177	0.265407	0.826099	-4.833
sp|Q9NZ01|TECR_HUMAN	TECR	Very-long-chain enoyl-CoA reductase OS=Homo sapiens OX=9606 GN=TECR PE=1 SV=1	-0.177058	8.09704	-1.20977	0.232966	0.79707	-4.83507
sp|O60683|PEX10_HUMAN	PEX10	Peroxisome biogenesis factor 10 OS=Homo sapiens OX=9606 GN=PEX10 PE=1 SV=1	-0.265225	5.71628	-0.966645	0.343743	0.856139	-4.83645
sp|Q7Z6G8|ANS1B_HUMAN	ANKS1B	Ankyrin repeat and sterile alpha motif domain-containing protein 1B OS=Homo sapiens OX=9606 GN=ANKS1B PE=1 SV=2	0.166138	7.70722	1.20737	0.233877	0.798671	-4.83739
sp|Q6P1A2|MBOA5_HUMAN	LPCAT3	Lysophospholipid acyltransferase 5 OS=Homo sapiens OX=9606 GN=LPCAT3 PE=1 SV=1	-0.195601	8.03446	-1.04381	0.305479	0.844338	-4.8374
sp|Q92888|ARHG1_HUMAN	ARHGEF1	Rho guanine nucleotide exchange factor 1 OS=Homo sapiens OX=9606 GN=ARHGEF1 PE=1 SV=2	-0.24087	6.65736	-1.08256	0.287606	0.836666	-4.8374
sp|P07108|ACBP_HUMAN	DBI	Acyl-CoA-binding protein OS=Homo sapiens OX=9606 GN=DBI PE=1 SV=2	0.219769	8.13251	1.20374	0.235263	0.80019	-4.84088
sp|P14927|QCR7_HUMAN	UQCRB	Cytochrome b-c1 complex subunit 7 OS=Homo sapiens OX=9606 GN=UQCRB PE=1 SV=2	-0.175204	9.0455	-1.20338	0.2354	0.80019	-4.84123
sp|O43681|GET3_HUMAN	GET3	ATPase GET3 OS=Homo sapiens OX=9606 GN=GET3 PE=1 SV=2	0.097638	7.76684	1.20327	0.235442	0.80019	-4.84133
sp|O00165|HAX1_HUMAN	HAX1	HCLS1-associated protein X-1 OS=Homo sapiens OX=9606 GN=HAX1 PE=1 SV=2	-0.163717	6.66823	-1.09174	0.283079	0.836666	-4.84139
sp|P04424|ARLY_HUMAN	ASL	Argininosuccinate lyase OS=Homo sapiens OX=9606 GN=ASL PE=1 SV=4	-0.198116	6.89184	-1.05323	0.300624	0.839539	-4.84271
sp|Q6F5E8|CARL2_HUMAN	CARMIL2	Capping protein, Arp2/3 and myosin-I linker protein 2 OS=Homo sapiens OX=9606 GN=CARMIL2 PE=1 SV=2	0.193915	6.33312	1.08142	0.28783	0.836666	-4.84287
sp|Q9UM47|NOTC3_HUMAN	NOTCH3	Neurogenic locus notch homolog protein 3 OS=Homo sapiens OX=9606 GN=NOTCH3 PE=1 SV=2	-0.186572	6.71811	-1.16758	0.250052	0.81383	-4.84323
sp|Q5T2E6|ARMD3_HUMAN	ARMH3	Armadillo-like helical domain-containing protein 3 OS=Homo sapiens OX=9606 GN=ARMH3 PE=1 SV=1	-0.214766	6.48888	-0.913725	0.36992	0.859967	-4.84336
sp|Q9HD20|AT131_HUMAN	ATP13A1	Endoplasmic reticulum transmembrane helix translocase OS=Homo sapiens OX=9606 GN=ATP13A1 PE=1 SV=2	-0.156288	6.98926	-1.20093	0.23634	0.800766	-4.84358
sp|Q9BTV5|FSD1_HUMAN	FSD1	Fibronectin type III and SPRY domain-containing protein 1 OS=Homo sapiens OX=9606 GN=FSD1 PE=1 SV=1	0.113499	7.15538	1.20079	0.236394	0.800766	-4.84372
sp|O75129|ASTN2_HUMAN	ASTN2	Astrotactin-2 OS=Homo sapiens OX=9606 GN=ASTN2 PE=1 SV=2	-0.149583	6.84275	-0.856456	0.400551	0.870919	-4.84536
sp|Q9UHI5|LAT2_HUMAN	SLC7A8	Large neutral amino acids transporter small subunit 2 OS=Homo sapiens OX=9606 GN=SLC7A8 PE=1 SV=1	-0.153586	7.08769	-1.16616	0.250616	0.81383	-4.8454
sp|P11166|GTR1_HUMAN	SLC2A1	Solute carrier family 2, facilitated glucose transporter member 1 OS=Homo sapiens OX=9606 GN=SLC2A1 PE=1 SV=2	0.210005	9.27099	1.19834	0.237336	0.802678	-4.84606
sp|Q9NY25|CLC5A_HUMAN	CLEC5A	C-type lectin domain family 5 member A OS=Homo sapiens OX=9606 GN=CLEC5A PE=1 SV=1	-0.263861	7.22262	-1.07604	0.290192	0.836666	-4.84715
sp|P08648|ITA5_HUMAN	ITGA5	Integrin alpha-5 OS=Homo sapiens OX=9606 GN=ITGA5 PE=1 SV=2	-0.16982	7.55159	-1.19608	0.238207	0.803444	-4.84823
sp|O94905|ERLN2_HUMAN	ERLIN2	Erlin-2 OS=Homo sapiens OX=9606 GN=ERLIN2 PE=1 SV=1	-0.173675	8.24696	-1.1955	0.23843	0.803444	-4.84878
sp|Q6GTX8|LAIR1_HUMAN	LAIR1	Leukocyte-associated immunoglobulin-like receptor 1 OS=Homo sapiens OX=9606 GN=LAIR1 PE=1 SV=2	-0.205752	7.39688	-1.15274	0.256204	0.815458	-4.84924
sp|P23743|DGKA_HUMAN	DGKA	Diacylglycerol kinase alpha OS=Homo sapiens OX=9606 GN=DGKA PE=1 SV=3	0.189551	6.77786	1.12288	0.269116	0.827098	-4.8493
sp|P17677|NEUM_HUMAN	GAP43	Neuromodulin OS=Homo sapiens OX=9606 GN=GAP43 PE=1 SV=1	-0.222932	8.95278	-1.19484	0.238687	0.803444	-4.84941
sp|Q9Y6E0|STK24_HUMAN	STK24	Serine/threonine-protein kinase 24 OS=Homo sapiens OX=9606 GN=STK24 PE=1 SV=1	-0.101749	6.55041	-1.19457	0.238791	0.803444	-4.84967
sp|P05023|AT1A1_HUMAN	ATP1A1	Sodium/potassium-transporting ATPase subunit alpha-1 OS=Homo sapiens OX=9606 GN=ATP1A1 PE=1 SV=1	0.10188	11.4569	1.19364	0.23915	0.803444	-4.85055
sp|P18564|ITB6_HUMAN	ITGB6	Integrin beta-6 OS=Homo sapiens OX=9606 GN=ITGB6 PE=1 SV=2	-0.289696	11.8045	-1.06535	0.295194	0.838616	-4.85096
sp|O95182|NDUA7_HUMAN	NDUFA7	NADH dehydrogenase [ubiquinone] 1 alpha subcomplex subunit 7 OS=Homo sapiens OX=9606 GN=NDUFA7 PE=1 SV=3	-0.200839	8.17819	-1.19296	0.239415	0.803444	-4.85121
sp|O60741|HCN1_HUMAN	HCN1	Potassium/sodium hyperpolarization-activated cyclic nucleotide-gated channel 1 OS=Homo sapiens OX=9606 GN=HCN1 PE=1 SV=3	-0.158275	6.38802	-1.1928	0.239475	0.803444	-4.85135
sp|P07355|ANXA2_HUMAN	ANXA2	Annexin A2 OS=Homo sapiens OX=9606 GN=ANXA2 PE=1 SV=2	-0.22571	10.5913	-1.19263	0.239541	0.803444	-4.85152
sp|Q05682|CALD1_HUMAN	CALD1	Caldesmon OS=Homo sapiens OX=9606 GN=CALD1 PE=1 SV=3	-0.168488	6.57524	-1.18345	0.243276	0.808294	-4.85252
sp|P11717|MPRI_HUMAN	IGF2R	Cation-independent mannose-6-phosphate receptor OS=Homo sapiens OX=9606 GN=IGF2R PE=1 SV=3	-0.104806	7.22806	-1.18981	0.240636	0.805148	-4.8542
sp|Q9NRZ7|PLCC_HUMAN	AGPAT3	1-acyl-sn-glycerol-3-phosphate acyltransferase gamma OS=Homo sapiens OX=9606 GN=AGPAT3 PE=1 SV=1	-0.129484	7.38564	-1.18961	0.240714	0.805148	-4.8544
sp|P30046|DOPD_HUMAN	DDT	D-dopachrome decarboxylase OS=Homo sapiens OX=9606 GN=DDT PE=1 SV=3	0.224551	8.2517	1.18902	0.240943	0.805148	-4.85495
sp|Q86W47|KCMB4_HUMAN	KCNMB4	Calcium-activated potassium channel subunit beta-4 OS=Homo sapiens OX=9606 GN=KCNMB4 PE=1 SV=2	-0.181399	6.97684	-0.998395	0.327262	0.851073	-4.85498
sp|Q9NPF4|OSGEP_HUMAN	OSGEP	tRNA N6-adenosine threonylcarbamoyltransferase OS=Homo sapiens OX=9606 GN=OSGEP PE=1 SV=1	0.156051	6.88752	1.14312	0.260124	0.821319	-4.85597
sp|P29992|GNA11_HUMAN	GNA11	Guanine nucleotide-binding protein subunit alpha-11 OS=Homo sapiens OX=9606 GN=GNA11 PE=1 SV=2	-0.152259	8.1244	-1.18765	0.241478	0.805976	-4.85626
tr|A0A2U3TZI3|A0A2U3TZI3_HUMAN	ATP2B2	Calcium-transporting ATPase OS=Homo sapiens OX=9606 GN=ATP2B2 PE=1 SV=1	0.208779	8.5331	1.18695	0.241752	0.806234	-4.85693
sp|P17540|KCRS_HUMAN	CKMT2	Creatine kinase S-type, mitochondrial OS=Homo sapiens OX=9606 GN=CKMT2 PE=1 SV=2	0.231644	7.17298	1.11268	0.273412	0.832735	-4.858
sp|P32119|PRDX2_HUMAN	PRDX2	Peroxiredoxin-2 OS=Homo sapiens OX=9606 GN=PRDX2 PE=1 SV=5	-0.14587	10.4002	-1.18513	0.242464	0.807293	-4.85865
sp|Q9H7M9|VISTA_HUMAN	VSIR	V-type immunoglobulin domain-containing suppressor of T-cell activation OS=Homo sapiens OX=9606 GN=VSIR PE=1 SV=3	-0.148236	7.97227	-1.03413	0.309599	0.845003	-4.85901
sp|P28068|DMB_HUMAN	HLA-DMB	HLA class II histocompatibility antigen, DM beta chain OS=Homo sapiens OX=9606 GN=HLA-DMB PE=1 SV=2	-0.249706	6.95978	-1.18425	0.242808	0.807781	-4.85949
sp|Q99536|VAT1_HUMAN	VAT1	Synaptic vesicle membrane protein VAT-1 homolog OS=Homo sapiens OX=9606 GN=VAT1 PE=1 SV=2	0.133021	8.52924	1.18285	0.243357	0.808294	-4.86081
sp|Q9P2P5|HECW2_HUMAN	HECW2	E3 ubiquitin-protein ligase HECW2 OS=Homo sapiens OX=9606 GN=HECW2 PE=1 SV=2	0.186047	5.85377	1.13576	0.263154	0.825155	-4.8625
sp|Q9NW15|ANO10_HUMAN	ANO10	Anoctamin-10 OS=Homo sapiens OX=9606 GN=ANO10 PE=1 SV=2	0.150662	6.96779	1.17967	0.244607	0.811075	-4.86382
sp|P27694|RFA1_HUMAN	RPA1	Replication protein A 70 kDa DNA-binding subunit OS=Homo sapiens OX=9606 GN=RPA1 PE=1 SV=2	0.186748	6.90044	0.935334	0.358903	0.859043	-4.86411
sp|Q03113|GNA12_HUMAN	GNA12	Guanine nucleotide-binding protein subunit alpha-12 OS=Homo sapiens OX=9606 GN=GNA12 PE=1 SV=4	0.127688	7.12121	1.16893	0.249011	0.813581	-4.86611
sp|Q9BS26|ERP44_HUMAN	ERP44	Endoplasmic reticulum resident protein 44 OS=Homo sapiens OX=9606 GN=ERP44 PE=1 SV=1	-0.122805	7.13619	-1.17682	0.245728	0.811075	-4.8665
sp|P62979|RS27A_HUMAN	RPS27A	Ubiquitin-40S ribosomal protein S27a OS=Homo sapiens OX=9606 GN=RPS27A PE=1 SV=2	-0.13374	12.1831	-1.17669	0.245782	0.811075	-4.86663
sp|Q7KYR7|BT2A1_HUMAN	BTN2A1	Butyrophilin subfamily 2 member A1 OS=Homo sapiens OX=9606 GN=BTN2A1 PE=1 SV=3	0.132425	6.81176	1.17657	0.245829	0.811075	-4.86674
sp|Q8WUW1|BRK1_HUMAN	BRK1	Protein BRICK1 OS=Homo sapiens OX=9606 GN=BRK1 PE=1 SV=1	0.125131	7.79846	1.17621	0.24597	0.811075	-4.86708
sp|O00533|NCHL1_HUMAN	CHL1	Neural cell adhesion molecule L1-like protein OS=Homo sapiens OX=9606 GN=CHL1 PE=1 SV=4	0.123374	7.25632	1.17611	0.246009	0.811075	-4.86717
sp|P40227|TCPZ_HUMAN	CCT6A	T-complex protein 1 subunit zeta OS=Homo sapiens OX=9606 GN=CCT6A PE=1 SV=3	-0.0793012	8.11633	-1.17596	0.24607	0.811075	-4.86731
sp|P78371|TCPB_HUMAN	CCT2	T-complex protein 1 subunit beta OS=Homo sapiens OX=9606 GN=CCT2 PE=1 SV=4	-0.0794976	8.09795	-1.17594	0.246078	0.811075	-4.86733
sp|O43760|SNG2_HUMAN	SYNGR2	Synaptogyrin-2 OS=Homo sapiens OX=9606 GN=SYNGR2 PE=1 SV=1	-0.205715	7.43706	-1.14081	0.260893	0.821336	-4.86742
sp|Q96HN2|SAHH3_HUMAN	AHCYL2	Adenosylhomocysteinase 3 OS=Homo sapiens OX=9606 GN=AHCYL2 PE=1 SV=1	-0.163928	7.48157	-1.17565	0.24619	0.811075	-4.8676
sp|Q16348|S15A2_HUMAN	SLC15A2	Solute carrier family 15 member 2 OS=Homo sapiens OX=9606 GN=SLC15A2 PE=1 SV=2	-0.163625	7.96743	-1.1753	0.24633	0.811075	-4.86793
sp|P08183|MDR1_HUMAN	ABCB1	ATP-dependent translocase ABCB1 OS=Homo sapiens OX=9606 GN=ABCB1 PE=1 SV=3	-0.152301	8.21358	-1.17519	0.246375	0.811075	-4.86804
sp|Q02878|RL6_HUMAN	RPL6	60S ribosomal protein L6 OS=Homo sapiens OX=9606 GN=RPL6 PE=1 SV=3	-0.102865	8.38588	-1.17438	0.246696	0.811152	-4.8688
sp|O14964|HGS_HUMAN	HGS	Hepatocyte growth factor-regulated tyrosine kinase substrate OS=Homo sapiens OX=9606 GN=HGS PE=1 SV=1	0.081616	7.35693	1.17355	0.247023	0.811252	-4.86958
sp|P82914|RT15_HUMAN	MRPS15	28S ribosomal protein S15, mitochondrial OS=Homo sapiens OX=9606 GN=MRPS15 PE=1 SV=1	-0.144309	6.94658	-0.90746	0.373962	0.859967	-4.87015
sp|O94921|CDK14_HUMAN	CDK14	Cyclin-dependent kinase 14 OS=Homo sapiens OX=9606 GN=CDK14 PE=1 SV=3	-0.124798	7.15443	-1.01814	0.317009	0.846183	-4.8709
sp|Q7L2E3|DHX30_HUMAN	DHX30	ATP-dependent RNA helicase DHX30 OS=Homo sapiens OX=9606 GN=DHX30 PE=1 SV=1	0.150865	6.95798	1.17111	0.247992	0.813094	-4.87187
sp|Q9BV81|EMC6_HUMAN	EMC6	ER membrane protein complex subunit 6 OS=Homo sapiens OX=9606 GN=EMC6 PE=1 SV=1	-0.197517	8.28182	-1.17064	0.248181	0.813094	-4.87231
sp|P61916|NPC2_HUMAN	NPC2	NPC intracellular cholesterol transporter 2 OS=Homo sapiens OX=9606 GN=NPC2 PE=1 SV=1	0.310159	6.83647	1.16141	0.25202	0.814585	-4.87309
sp|O76095|JTB_HUMAN	JTB	Protein JTB OS=Homo sapiens OX=9606 GN=JTB PE=1 SV=1	-0.137163	7.23686	-1.16083	0.252256	0.814705	-4.87363
sp|P61803|DAD1_HUMAN	DAD1	Dolichyl-diphosphooligosaccharide--protein glycosyltransferase subunit DAD1 OS=Homo sapiens OX=9606 GN=DAD1 PE=1 SV=3	-0.17417	9.35812	-1.16902	0.248824	0.813581	-4.87383
sp|Q9NWB1|RFOX1_HUMAN	RBFOX1	RNA binding protein fox-1 homolog 1 OS=Homo sapiens OX=9606 GN=RBFOX1 PE=1 SV=2	0.150605	7.00018	0.958409	0.346658	0.85766	-4.87452
sp|P10523|ARRS_HUMAN	SAG	S-arrestin OS=Homo sapiens OX=9606 GN=SAG PE=1 SV=3	-0.209633	7.77442	-1.15873	0.2531	0.815261	-4.87557
sp|P26038|MOES_HUMAN	MSN	Moesin OS=Homo sapiens OX=9606 GN=MSN PE=1 SV=3	-0.139838	8.60896	-1.16683	0.249696	0.81383	-4.87587
sp|Q96P48|ARAP1_HUMAN	ARAP1	Arf-GAP with Rho-GAP domain, ANK repeat and PH domain-containing protein 1 OS=Homo sapiens OX=9606 GN=ARAP1 PE=1 SV=3	0.222056	6.09877	1.13082	0.265022	0.825949	-4.87631
sp|Q96K19|RN170_HUMAN	RNF170	E3 ubiquitin-protein ligase RNF170 OS=Homo sapiens OX=9606 GN=RNF170 PE=1 SV=2	-0.167601	7.01556	-1.16516	0.250366	0.81383	-4.87744
sp|P20674|COX5A_HUMAN	COX5A	Cytochrome c oxidase subunit 5A, mitochondrial OS=Homo sapiens OX=9606 GN=COX5A PE=1 SV=2	0.197225	10.7965	1.16408	0.250798	0.81383	-4.87844
sp|O00217|NDUS8_HUMAN	NDUFS8	NADH dehydrogenase [ubiquinone] iron-sulfur protein 8, mitochondrial OS=Homo sapiens OX=9606 GN=NDUFS8 PE=1 SV=1	-0.167405	7.84448	-1.1633	0.25111	0.81383	-4.87917
sp|Q14088|RB33A_HUMAN	RAB33A	Ras-related protein Rab-33A OS=Homo sapiens OX=9606 GN=RAB33A PE=1 SV=2	0.105708	7.71289	1.16313	0.251178	0.81383	-4.87933
sp|Q5SQI0|ATAT_HUMAN	ATAT1	Alpha-tubulin N-acetyltransferase 1 OS=Homo sapiens OX=9606 GN=ATAT1 PE=1 SV=1	0.0934502	7.22323	1.16259	0.251398	0.81383	-4.87983
sp|Q96S06|LMF1_HUMAN	LMF1	Lipase maturation factor 1 OS=Homo sapiens OX=9606 GN=LMF1 PE=1 SV=1	-0.248519	5.99932	-0.994429	0.328507	0.851073	-4.88017
sp|O00186|STXB3_HUMAN	STXBP3	Syntaxin-binding protein 3 OS=Homo sapiens OX=9606 GN=STXBP3 PE=1 SV=2	-0.0960214	7.45063	-1.16211	0.251587	0.81383	-4.88027
sp|P35749|MYH11_HUMAN	MYH11	Myosin-11 OS=Homo sapiens OX=9606 GN=MYH11 PE=1 SV=3	-0.194808	7.36276	-1.15784	0.25331	0.815261	-4.88425
sp|Q5JY77|GASP1_HUMAN	GPRASP1	G-protein coupled receptor-associated sorting protein 1 OS=Homo sapiens OX=9606 GN=GPRASP1 PE=1 SV=3	-0.167899	6.98386	-0.865864	0.395477	0.870919	-4.88514
sp|Q9NTI2|AT8A2_HUMAN	ATP8A2	Phospholipid-transporting ATPase IB OS=Homo sapiens OX=9606 GN=ATP8A2 PE=1 SV=3	-0.128713	6.88372	-1.15655	0.253828	0.815261	-4.88544
sp|Q5VUB5|F1711_HUMAN	FAM171A1	Protein FAM171A1 OS=Homo sapiens OX=9606 GN=FAM171A1 PE=1 SV=1	0.101011	6.88014	1.15654	0.253834	0.815261	-4.88545
sp|Q05329|DCE2_HUMAN	GAD2	Glutamate decarboxylase 2 OS=Homo sapiens OX=9606 GN=GAD2 PE=1 SV=1	0.146145	6.9474	1.15508	0.254424	0.815261	-4.8868
sp|O00241|SIRB1_HUMAN	SIRPB1	Signal-regulatory protein beta-1 OS=Homo sapiens OX=9606 GN=SIRPB1 PE=1 SV=5	0.226517	10.0666	1.10033	0.278279	0.835676	-4.88699
sp|Q8IXI2|MIRO1_HUMAN	RHOT1	Mitochondrial Rho GTPase 1 OS=Homo sapiens OX=9606 GN=RHOT1 PE=1 SV=2	0.150805	7.2547	1.15426	0.254758	0.815261	-4.88756
sp|P05106|ITB3_HUMAN	ITGB3	Integrin beta-3 OS=Homo sapiens OX=9606 GN=ITGB3 PE=1 SV=2	-0.294893	7.51081	-1.1538	0.254943	0.815261	-4.88799
sp|Q8NFF2|NCKX4_HUMAN	SLC24A4	Sodium/potassium/calcium exchanger 4 OS=Homo sapiens OX=9606 GN=SLC24A4 PE=1 SV=2	0.213916	7.45392	1.03931	0.306431	0.844338	-4.88823
sp|Q96MM6|HS12B_HUMAN	HSPA12B	Heat shock 70 kDa protein 12B OS=Homo sapiens OX=9606 GN=HSPA12B PE=1 SV=2	-0.131014	7.67939	-1.1534	0.255106	0.815261	-4.88836
sp|Q86V88|MGDP1_HUMAN	MDP1	Magnesium-dependent phosphatase 1 OS=Homo sapiens OX=9606 GN=MDP1 PE=1 SV=1	0.148774	7.33947	1.04873	0.301905	0.839539	-4.88838
sp|Q9NPD7|NRN1_HUMAN	NRN1	Neuritin OS=Homo sapiens OX=9606 GN=NRN1 PE=2 SV=1	0.245218	7.37808	1.15327	0.255159	0.815261	-4.88848
sp|Q86YM7|HOME1_HUMAN	HOMER1	Homer protein homolog 1 OS=Homo sapiens OX=9606 GN=HOMER1 PE=1 SV=2	-0.144275	6.34156	-1.15317	0.2552	0.815261	-4.88857
sp|P35579|MYH9_HUMAN	MYH9	Myosin-9 OS=Homo sapiens OX=9606 GN=MYH9 PE=1 SV=4	-0.12619	8.43507	-1.15313	0.255217	0.815261	-4.88861
sp|Q9UJD0|RIMS3_HUMAN	RIMS3	Regulating synaptic membrane exocytosis protein 3 OS=Homo sapiens OX=9606 GN=RIMS3 PE=1 SV=1	0.126792	7.45189	1.12454	0.267474	0.826665	-4.88898
tr|A0A140T997|A0A140T997_HUMAN	HLA-B	HLA class I histocompatibility antigen, B alpha chain (Fragment) OS=Homo sapiens OX=9606 GN=HLA-B PE=1 SV=1	-0.277979	8.42355	-0.936485	0.357616	0.859043	-4.88903
sp|P25189|MYP0_HUMAN	MPZ	Myelin protein P0 OS=Homo sapiens OX=9606 GN=MPZ PE=1 SV=1	0.403707	8.37734	1.04139	0.305481	0.844338	-4.88926
sp|O95292|VAPB_HUMAN	VAPB	Vesicle-associated membrane protein-associated protein B/C OS=Homo sapiens OX=9606 GN=VAPB PE=1 SV=3	0.0914393	7.02692	1.15191	0.255712	0.815458	-4.88974
sp|P19652|A1AG2_HUMAN	ORM2	Alpha-1-acid glycoprotein 2 OS=Homo sapiens OX=9606 GN=ORM2 PE=1 SV=2	0.218535	6.88911	1.09694	0.279739	0.835676	-4.88989
sp|P49418|AMPH_HUMAN	AMPH	Amphiphysin OS=Homo sapiens OX=9606 GN=AMPH PE=1 SV=1	0.134309	8.31937	1.15157	0.25585	0.815458	-4.89005
sp|Q9UDR5|AASS_HUMAN	AASS	Alpha-aminoadipic semialdehyde synthase, mitochondrial OS=Homo sapiens OX=9606 GN=AASS PE=1 SV=1	-0.174126	6.35241	-1.0831	0.285951	0.836666	-4.89046
sp|Q92845|KIFA3_HUMAN	KIFAP3	Kinesin-associated protein 3 OS=Homo sapiens OX=9606 GN=KIFAP3 PE=1 SV=2	0.149678	6.4634	1.15108	0.256049	0.815458	-4.8905
sp|P51665|PSMD7_HUMAN	PSMD7	26S proteasome non-ATPase regulatory subunit 7 OS=Homo sapiens OX=9606 GN=PSMD7 PE=1 SV=2	-0.0860431	8.04014	-1.14948	0.256702	0.815458	-4.89198
sp|Q13509|TBB3_HUMAN	TUBB3	Tubulin beta-3 chain OS=Homo sapiens OX=9606 GN=TUBB3 PE=1 SV=2	0.160613	11.51	1.14927	0.256784	0.815458	-4.89216
sp|O60613|SEP15_HUMAN	SELENOF	Selenoprotein F OS=Homo sapiens OX=9606 GN=SELENOF PE=1 SV=4	0.156567	6.59482	1.14912	0.256849	0.815458	-4.89231
sp|Q9H0I9|TKTL2_HUMAN	TKTL2	Transketolase-like protein 2 OS=Homo sapiens OX=9606 GN=TKTL2 PE=2 SV=1	-0.210716	10.3152	-1.04851	0.302004	0.839539	-4.89232
sp|Q8IWT6|LRC8A_HUMAN	LRRC8A	Volume-regulated anion channel subunit LRRC8A OS=Homo sapiens OX=9606 GN=LRRC8A PE=1 SV=1	-0.11442	7.48298	-1.14906	0.256873	0.815458	-4.89237
sp|P30153|2AAA_HUMAN	PPP2R1A	Serine/threonine-protein phosphatase 2A 65 kDa regulatory subunit A alpha isoform OS=Homo sapiens OX=9606 GN=PPP2R1A PE=1 SV=4	0.0812914	8.23976	1.14749	0.257513	0.816855	-4.89381
sp|O14594|NCAN_HUMAN	NCAN	Neurocan core protein OS=Homo sapiens OX=9606 GN=NCAN PE=1 SV=3	0.146174	8.49447	1.14672	0.257829	0.817223	-4.89452
sp|P17600|SYN1_HUMAN	SYN1	Synapsin-1 OS=Homo sapiens OX=9606 GN=SYN1 PE=1 SV=3	0.129095	9.07108	1.14497	0.258544	0.818855	-4.89612
sp|Q99569|PKP4_HUMAN	PKP4	Plakophilin-4 OS=Homo sapiens OX=9606 GN=PKP4 PE=1 SV=2	-0.147014	7.25437	-1.12718	0.266209	0.826099	-4.89662
sp|Q86VP6|CAND1_HUMAN	CAND1	Cullin-associated NEDD8-dissociated protein 1 OS=Homo sapiens OX=9606 GN=CAND1 PE=1 SV=2	0.135289	8.3314	1.14391	0.258976	0.81908	-4.89709
sp|P40616|ARL1_HUMAN	ARL1	ADP-ribosylation factor-like protein 1 OS=Homo sapiens OX=9606 GN=ARL1 PE=1 SV=1	0.132554	7.78399	1.14248	0.259565	0.820185	-4.89841
sp|Q9NZJ6|COQ3_HUMAN	COQ3	Ubiquinone biosynthesis O-methyltransferase, mitochondrial OS=Homo sapiens OX=9606 GN=COQ3 PE=1 SV=3	0.180763	6.18886	0.83442	0.413401	0.876043	-4.89963
sp|Q8TEQ6|GEMI5_HUMAN	GEMIN5	Gem-associated protein 5 OS=Homo sapiens OX=9606 GN=GEMIN5 PE=1 SV=3	0.138216	6.9334	0.916526	0.368121	0.859967	-4.90064
sp|Q9NXS2|QPCTL_HUMAN	QPCTL	Glutaminyl-peptide cyclotransferase-like protein OS=Homo sapiens OX=9606 GN=QPCTL PE=1 SV=2	0.166309	7.20626	0.89173	0.381363	0.865443	-4.90075
sp|Q5TBA9|FRY_HUMAN	FRY	Protein furry homolog OS=Homo sapiens OX=9606 GN=FRY PE=1 SV=1	-0.142102	6.96617	-1.09167	0.28184	0.836666	-4.90078
sp|Q9NY33|DPP3_HUMAN	DPP3	Dipeptidyl peptidase 3 OS=Homo sapiens OX=9606 GN=DPP3 PE=1 SV=2	0.158789	7.01183	1.13927	0.260888	0.821336	-4.90135
sp|Q9P0M2|AKA7G_HUMAN	AKAP7	A-kinase anchor protein 7 isoform gamma OS=Homo sapiens OX=9606 GN=AKAP7 PE=1 SV=2	-0.139953	8.87509	-1.13899	0.261002	0.821336	-4.9016
sp|Q96EQ0|SGTB_HUMAN	SGTB	Small glutamine-rich tetratricopeptide repeat-containing protein beta OS=Homo sapiens OX=9606 GN=SGTB PE=1 SV=1	0.155316	7.32681	1.13841	0.26124	0.821336	-4.90213
sp|Q9Y6Y8|S23IP_HUMAN	SEC23IP	SEC23-interacting protein OS=Homo sapiens OX=9606 GN=SEC23IP PE=1 SV=1	0.0787254	7.04169	1.10999	0.273619	0.832735	-4.90356
sp|Q4G176|ACSF3_HUMAN	ACSF3	Malonate--CoA ligase ACSF3, mitochondrial OS=Homo sapiens OX=9606 GN=ACSF3 PE=1 SV=3	0.131603	6.76031	1.13659	0.261992	0.822772	-4.90379
sp|Q13043|STK4_HUMAN	STK4	Serine/threonine-protein kinase 4 OS=Homo sapiens OX=9606 GN=STK4 PE=1 SV=2	-0.145885	6.69521	-1.1274	0.265963	0.826099	-4.90414
sp|Q14714|SSPN_HUMAN	SSPN	Sarcospan OS=Homo sapiens OX=9606 GN=SSPN PE=2 SV=3	-0.184298	7.69725	-1.12549	0.266759	0.826328	-4.90585
sp|Q9Y5R8|TPPC1_HUMAN	TRAPPC1	Trafficking protein particle complex subunit 1 OS=Homo sapiens OX=9606 GN=TRAPPC1 PE=1 SV=1	-0.136001	7.36864	-1.10633	0.275179	0.832931	-4.90676
sp|P51570|GALK1_HUMAN	GALK1	Galactokinase OS=Homo sapiens OX=9606 GN=GALK1 PE=1 SV=1	-0.101776	7.5536	-1.13268	0.263616	0.825158	-4.90735
sp|Q8IZP0|ABI1_HUMAN	ABI1	Abl interactor 1 OS=Homo sapiens OX=9606 GN=ABI1 PE=1 SV=4	0.132406	8.35796	1.13233	0.26376	0.825158	-4.90767
sp|Q9UPW5|CBPC1_HUMAN	AGTPBP1	Cytosolic carboxypeptidase 1 OS=Homo sapiens OX=9606 GN=AGTPBP1 PE=1 SV=3	-0.143018	6.43864	-1.1135	0.271966	0.832373	-4.90879
sp|Q07157|ZO1_HUMAN	TJP1	Tight junction protein ZO-1 OS=Homo sapiens OX=9606 GN=TJP1 PE=1 SV=3	0.0907078	6.83146	1.13064	0.264463	0.825949	-4.9092
sp|Q9Y570|PPME1_HUMAN	PPME1	Protein phosphatase methylesterase 1 OS=Homo sapiens OX=9606 GN=PPME1 PE=1 SV=3	0.0893249	6.98878	1.13029	0.264607	0.825949	-4.90952
sp|Q9NRV9|HEBP1_HUMAN	HEBP1	Heme-binding protein 1 OS=Homo sapiens OX=9606 GN=HEBP1 PE=1 SV=1	-0.181515	8.27038	-1.13005	0.264709	0.825949	-4.90974
sp|Q9BSJ8|ESYT1_HUMAN	ESYT1	Extended synaptotagmin-1 OS=Homo sapiens OX=9606 GN=ESYT1 PE=1 SV=1	0.104831	7.96587	1.12967	0.264867	0.825949	-4.91008
sp|Q9Y282|ERGI3_HUMAN	ERGIC3	Endoplasmic reticulum-Golgi intermediate compartment protein 3 OS=Homo sapiens OX=9606 GN=ERGIC3 PE=1 SV=1	-0.163618	7.21122	-1.12063	0.268803	0.827098	-4.91021
sp|O43264|ZW10_HUMAN	ZW10	Centromere/kinetochore protein zw10 homolog OS=Homo sapiens OX=9606 GN=ZW10 PE=1 SV=3	0.144833	6.95031	0.9395	0.35578	0.85897	-4.91119
sp|Q8N5V2|NGEF_HUMAN	NGEF	Ephexin-1 OS=Homo sapiens OX=9606 GN=NGEF PE=1 SV=2	-0.258435	5.59559	-0.856442	0.400197	0.870919	-4.91216
sp|Q14166|TTL12_HUMAN	TTLL12	Tubulin--tyrosine ligase-like protein 12 OS=Homo sapiens OX=9606 GN=TTLL12 PE=1 SV=2	0.128853	7.06095	1.12719	0.2659	0.826099	-4.91233
sp|P53609|PGTB1_HUMAN	PGGT1B	Geranylgeranyl transferase type-1 subunit beta OS=Homo sapiens OX=9606 GN=PGGT1B PE=1 SV=2	0.160169	6.6249	0.886925	0.383546	0.865905	-4.91264
sp|Q8N111|CEND_HUMAN	CEND1	Cell cycle exit and neuronal differentiation protein 1 OS=Homo sapiens OX=9606 GN=CEND1 PE=1 SV=1	-0.173058	8.86531	-1.12628	0.266282	0.826099	-4.91315
sp|P21589|5NTD_HUMAN	NT5E	5'-nucleotidase OS=Homo sapiens OX=9606 GN=NT5E PE=1 SV=1	-0.154605	8.49712	-1.12563	0.266555	0.826321	-4.91374
sp|Q8IYS2|K2013_HUMAN	KIAA2013	Uncharacterized protein KIAA2013 OS=Homo sapiens OX=9606 GN=KIAA2013 PE=1 SV=1	-0.145304	7.197	-1.10772	0.274427	0.832931	-4.9139
sp|P07998|RNAS1_HUMAN	RNASE1	Ribonuclease pancreatic OS=Homo sapiens OX=9606 GN=RNASE1 PE=1 SV=4	-0.179448	6.80913	-1.04412	0.303574	0.842757	-4.91463
sp|P07237|PDIA1_HUMAN	P4HB	Protein disulfide-isomerase OS=Homo sapiens OX=9606 GN=P4HB PE=1 SV=3	0.168597	7.34596	1.12409	0.2672	0.826443	-4.91513
sp|Q13554|KCC2B_HUMAN	CAMK2B	Calcium/calmodulin-dependent protein kinase type II subunit beta OS=Homo sapiens OX=9606 GN=CAMK2B PE=1 SV=3	0.0966096	8.67367	1.12276	0.26776	0.826924	-4.91633
sp|P20042|IF2B_HUMAN	EIF2S2	Eukaryotic translation initiation factor 2 subunit 2 OS=Homo sapiens OX=9606 GN=EIF2S2 PE=1 SV=2	-0.0913151	7.51343	-1.12225	0.267971	0.826953	-4.91679
sp|O76070|SYUG_HUMAN	SNCG	Gamma-synuclein OS=Homo sapiens OX=9606 GN=SNCG PE=1 SV=2	0.139987	8.71141	1.12154	0.268273	0.827098	-4.91743
sp|Q9Y3C8|UFC1_HUMAN	UFC1	Ubiquitin-fold modifier-conjugating enzyme 1 OS=Homo sapiens OX=9606 GN=UFC1 PE=1 SV=3	0.135869	7.17363	1.05278	0.299443	0.839539	-4.9176
sp|Q8WX93|PALLD_HUMAN	PALLD	Palladin OS=Homo sapiens OX=9606 GN=PALLD PE=1 SV=3	0.141353	6.97364	1.07331	0.289886	0.836666	-4.91825
sp|Q7L1I2|SV2B_HUMAN	SV2B	Synaptic vesicle glycoprotein 2B OS=Homo sapiens OX=9606 GN=SV2B PE=1 SV=1	-0.242261	9.34428	-1.12052	0.268702	0.827098	-4.91835
sp|P98172|EFNB1_HUMAN	EFNB1	Ephrin-B1 OS=Homo sapiens OX=9606 GN=EFNB1 PE=1 SV=1	0.204918	6.11903	0.869722	0.39304	0.870919	-4.91893
sp|Q9Y6G9|DC1L1_HUMAN	DYNC1LI1	Cytoplasmic dynein 1 light intermediate chain 1 OS=Homo sapiens OX=9606 GN=DYNC1LI1 PE=1 SV=3	0.0751861	7.35332	1.11924	0.269239	0.827098	-4.9195
sp|Q99490|AGAP2_HUMAN	AGAP2	Arf-GAP with GTPase, ANK repeat and PH domain-containing protein 2 OS=Homo sapiens OX=9606 GN=AGAP2 PE=1 SV=2	0.163962	5.98736	0.95011	0.349887	0.85897	-4.91958
tr|B1APF7|B1APF7_HUMAN	PRKACB	Protein kinase cAMP-activated catalytic subunit beta (Fragment) OS=Homo sapiens OX=9606 GN=PRKACB PE=1 SV=1	0.253181	6.02612	1.11846	0.26957	0.827098	-4.9202
sp|Q9H1E5|TMX4_HUMAN	TMX4	Thioredoxin-related transmembrane protein 4 OS=Homo sapiens OX=9606 GN=TMX4 PE=1 SV=1	-0.21088	9.64378	-1.11816	0.269695	0.827098	-4.92047
sp|P28288|ABCD3_HUMAN	ABCD3	ATP-binding cassette sub-family D member 3 OS=Homo sapiens OX=9606 GN=ABCD3 PE=1 SV=1	0.112357	6.58189	1.11782	0.269838	0.827098	-4.92077
sp|P52569|CTR2_HUMAN	SLC7A2	Cationic amino acid transporter 2 OS=Homo sapiens OX=9606 GN=SLC7A2 PE=1 SV=2	-0.177986	7.11594	-1.07942	0.287018	0.836666	-4.92094
sp|P62861|RS30_HUMAN	FAU	FAU ubiquitin-like and ribosomal protein S30 OS=Homo sapiens OX=9606 GN=FAU PE=1 SV=2	0.167821	7.04763	1.02417	0.312968	0.846183	-4.92192
sp|Q96CW5|GCP3_HUMAN	TUBGCP3	Gamma-tubulin complex component 3 OS=Homo sapiens OX=9606 GN=TUBGCP3 PE=1 SV=2	0.147127	7.38475	0.987588	0.330745	0.851073	-4.922
sp|Q13428|TCOF_HUMAN	TCOF1	Treacle protein OS=Homo sapiens OX=9606 GN=TCOF1 PE=1 SV=3	0.219163	6.4098	0.930107	0.360244	0.859043	-4.92488
sp|Q9HCE6|ARGAL_HUMAN	ARHGEF10L	Rho guanine nucleotide exchange factor 10-like protein OS=Homo sapiens OX=9606 GN=ARHGEF10L PE=1 SV=4	-0.20203	6.46733	-0.979075	0.335103	0.851887	-4.92527
sp|P16930|FAAA_HUMAN	FAH	Fumarylacetoacetase OS=Homo sapiens OX=9606 GN=FAH PE=1 SV=2	-0.160204	7.11539	-1.11224	0.272205	0.832483	-4.92578
sp|O95749|GGPPS_HUMAN	GGPS1	Geranylgeranyl pyrophosphate synthase OS=Homo sapiens OX=9606 GN=GGPS1 PE=1 SV=1	0.226191	6.26258	1.00576	0.321831	0.849087	-4.92683
sp|Q96FE5|LIGO1_HUMAN	LINGO1	Leucine-rich repeat and immunoglobulin-like domain-containing nogo receptor-interacting protein 1 OS=Homo sapiens OX=9606 GN=LINGO1 PE=1 SV=2	0.115718	7.02809	1.10183	0.276799	0.834893	-4.92691
sp|Q9Y315|DEOC_HUMAN	DERA	Deoxyribose-phosphate aldolase OS=Homo sapiens OX=9606 GN=DERA PE=1 SV=2	-0.156361	6.72059	-1.11078	0.272824	0.832735	-4.92708
sp|P53365|ARFP2_HUMAN	ARFIP2	Arfaptin-2 OS=Homo sapiens OX=9606 GN=ARFIP2 PE=1 SV=1	0.117619	7.60868	1.10128	0.277037	0.834893	-4.9274
sp|Q9BV23|ABHD6_HUMAN	ABHD6	Monoacylglycerol lipase ABHD6 OS=Homo sapiens OX=9606 GN=ABHD6 PE=1 SV=1	0.13469	7.34282	0.876058	0.389313	0.869678	-4.92829
sp|Q9UIW2|PLXA1_HUMAN	PLXNA1	Plexin-A1 OS=Homo sapiens OX=9606 GN=PLXNA1 PE=1 SV=3	-0.11541	7.38853	-1.10939	0.273417	0.832735	-4.92832
sp|O95622|ADCY5_HUMAN	ADCY5	Adenylate cyclase type 5 OS=Homo sapiens OX=9606 GN=ADCY5 PE=1 SV=3	0.154026	7.79067	1.10937	0.273425	0.832735	-4.92833
sp|Q9UIK5|TEFF2_HUMAN	TMEFF2	Tomoregulin-2 OS=Homo sapiens OX=9606 GN=TMEFF2 PE=1 SV=1	0.165827	7.14175	1.0704	0.291008	0.836666	-4.92858
sp|P11279|LAMP1_HUMAN	LAMP1	Lysosome-associated membrane glycoprotein 1 OS=Homo sapiens OX=9606 GN=LAMP1 PE=1 SV=3	-0.111832	9.58161	-1.10874	0.273695	0.832735	-4.9289
sp|Q86YS7|C2CD5_HUMAN	C2CD5	C2 domain-containing protein 5 OS=Homo sapiens OX=9606 GN=C2CD5 PE=1 SV=1	-0.10137	7.46348	-1.10853	0.273783	0.832735	-4.92908
sp|Q9Y2V2|CHSP1_HUMAN	CARHSP1	Calcium-regulated heat-stable protein 1 OS=Homo sapiens OX=9606 GN=CARHSP1 PE=1 SV=2	-0.152013	6.61045	-0.935839	0.357063	0.85897	-4.9294
sp|Q93045|STMN2_HUMAN	STMN2	Stathmin-2 OS=Homo sapiens OX=9606 GN=STMN2 PE=1 SV=3	-0.310556	11.2184	-0.908343	0.371711	0.859967	-4.92998
sp|A1A5C7|S22AN_HUMAN	SLC22A23	Solute carrier family 22 member 23 OS=Homo sapiens OX=9606 GN=SLC22A23 PE=1 SV=2	0.0986975	7.43689	1.09791	0.278487	0.835676	-4.93036
sp|Q17R89|RHG44_HUMAN	ARHGAP44	Rho GTPase-activating protein 44 OS=Homo sapiens OX=9606 GN=ARHGAP44 PE=1 SV=1	-0.114877	6.62748	-1.10696	0.274453	0.832931	-4.93048
sp|P61026|RAB10_HUMAN	RAB10	Ras-related protein Rab-10 OS=Homo sapiens OX=9606 GN=RAB10 PE=1 SV=1	-0.133881	9.36454	-1.10582	0.274941	0.832931	-4.93149
sp|Q86UD5|SL9B2_HUMAN	SLC9B2	Sodium/hydrogen exchanger 9B2 OS=Homo sapiens OX=9606 GN=SLC9B2 PE=1 SV=2	-0.15168	6.38849	-1.0242	0.312752	0.846183	-4.9316
sp|O43581|SYT7_HUMAN	SYT7	Synaptotagmin-7 OS=Homo sapiens OX=9606 GN=SYT7 PE=1 SV=3	0.116085	8.23141	1.10521	0.275201	0.832931	-4.93203
sp|P51991|ROA3_HUMAN	HNRNPA3	Heterogeneous nuclear ribonucleoprotein A3 OS=Homo sapiens OX=9606 GN=HNRNPA3 PE=1 SV=2	-0.102584	7.18151	-1.10357	0.275907	0.834053	-4.9335
sp|Q9UBP4|DKK3_HUMAN	DKK3	Dickkopf-related protein 3 OS=Homo sapiens OX=9606 GN=DKK3 PE=1 SV=2	-0.163955	6.57142	-1.1034	0.27598	0.834053	-4.93364
sp|O43504|LTOR5_HUMAN	LAMTOR5	Ragulator complex protein LAMTOR5 OS=Homo sapiens OX=9606 GN=LAMTOR5 PE=1 SV=1	0.19407	7.78973	1.0747	0.288936	0.836666	-4.93407
sp|Q9H4L5|OSBL3_HUMAN	OSBPL3	Oxysterol-binding protein-related protein 3 OS=Homo sapiens OX=9606 GN=OSBPL3 PE=1 SV=1	0.150924	6.88537	0.862906	0.396366	0.870919	-4.9341
sp|P56181|NDUV3_HUMAN	NDUFV3	NADH dehydrogenase [ubiquinone] flavoprotein 3, mitochondrial OS=Homo sapiens OX=9606 GN=NDUFV3 PE=1 SV=2	-0.342696	8.22661	-1.10096	0.27703	0.834893	-4.93581
sp|Q5SSJ5|HP1B3_HUMAN	HP1BP3	Heterochromatin protein 1-binding protein 3 OS=Homo sapiens OX=9606 GN=HP1BP3 PE=1 SV=1	-0.131118	7.57464	-1.10076	0.277113	0.834893	-4.93598
sp|P49407|ARRB1_HUMAN	ARRB1	Beta-arrestin-1 OS=Homo sapiens OX=9606 GN=ARRB1 PE=1 SV=2	0.113896	7.86716	1.10038	0.277277	0.834893	-4.93632
sp|Q9UNW9|NOVA2_HUMAN	NOVA2	RNA-binding protein Nova-2 OS=Homo sapiens OX=9606 GN=NOVA2 PE=1 SV=1	-0.111432	7.29561	-1.0908	0.281568	0.836666	-4.93658
sp|Q8WTR4|GDPD5_HUMAN	GDPD5	Glycerophosphodiester phosphodiesterase domain-containing protein 5 OS=Homo sapiens OX=9606 GN=GDPD5 PE=1 SV=2	-0.156706	6.86774	-1.08155	0.28576	0.836666	-4.93669
sp|Q6PIU2|NCEH1_HUMAN	NCEH1	Neutral cholesterol ester hydrolase 1 OS=Homo sapiens OX=9606 GN=NCEH1 PE=1 SV=3	0.139158	7.89704	1.09905	0.277852	0.835395	-4.9375
sp|A2RTX5|SYTC2_HUMAN	TARS3	Threonine--tRNA ligase 2, cytoplasmic OS=Homo sapiens OX=9606 GN=TARS3 PE=1 SV=1	-0.204921	6.80576	-0.860717	0.397549	0.870919	-4.93768
sp|Q15773|MLF2_HUMAN	MLF2	Myeloid leukemia factor 2 OS=Homo sapiens OX=9606 GN=MLF2 PE=1 SV=1	0.142468	7.44982	1.09597	0.279181	0.835676	-4.94021
sp|Q8IUS5|EPHX4_HUMAN	EPHX4	Epoxide hydrolase 4 OS=Homo sapiens OX=9606 GN=EPHX4 PE=1 SV=2	0.218469	7.08116	0.952169	0.348358	0.85897	-4.94021
sp|Q6UXN9|WDR82_HUMAN	WDR82	WD repeat-containing protein 82 OS=Homo sapiens OX=9606 GN=WDR82 PE=1 SV=1	0.080407	7.31756	1.09509	0.27956	0.835676	-4.94098
sp|O95817|BAG3_HUMAN	BAG3	BAG family molecular chaperone regulator 3 OS=Homo sapiens OX=9606 GN=BAG3 PE=1 SV=3	0.172098	6.97128	0.960825	0.343827	0.856139	-4.94151
sp|Q5TH69|BIG3_HUMAN	ARFGEF3	Brefeldin A-inhibited guanine nucleotide-exchange protein 3 OS=Homo sapiens OX=9606 GN=ARFGEF3 PE=1 SV=3	0.0982897	6.77408	1.0944	0.279862	0.835676	-4.9416
sp|Q9GZP4|PITH1_HUMAN	PITHD1	PITH domain-containing protein 1 OS=Homo sapiens OX=9606 GN=PITHD1 PE=1 SV=1	-0.10437	7.26299	-1.09416	0.279964	0.835676	-4.9418
sp|Q96S19|MTL26_HUMAN	METTL26	Methyltransferase-like 26 OS=Homo sapiens OX=9606 GN=METTL26 PE=1 SV=2	0.10861	6.93752	1.09408	0.280002	0.835676	-4.94188
sp|Q8N126|CADM3_HUMAN	CADM3	Cell adhesion molecule 3 OS=Homo sapiens OX=9606 GN=CADM3 PE=1 SV=1	0.14969	8.33485	1.09399	0.280037	0.835676	-4.94195
sp|Q15042|RB3GP_HUMAN	RAB3GAP1	Rab3 GTPase-activating protein catalytic subunit OS=Homo sapiens OX=9606 GN=RAB3GAP1 PE=1 SV=3	0.0813948	6.53575	1.09373	0.280152	0.835676	-4.94219
sp|Q15700|DLG2_HUMAN	DLG2	Disks large homolog 2 OS=Homo sapiens OX=9606 GN=DLG2 PE=1 SV=3	-0.0801857	7.07767	-1.09364	0.280192	0.835676	-4.94227
sp|Q15843|NEDD8_HUMAN	NEDD8	NEDD8 OS=Homo sapiens OX=9606 GN=NEDD8 PE=1 SV=1	-0.183532	6.87048	-0.981715	0.333366	0.851073	-4.94367
sp|Q9NZD2|GLTP_HUMAN	GLTP	Glycolipid transfer protein OS=Homo sapiens OX=9606 GN=GLTP PE=1 SV=3	0.166398	8.45079	1.09154	0.281103	0.836666	-4.94411
sp|Q6NZI2|CAVN1_HUMAN	CAVIN1	Caveolae-associated protein 1 OS=Homo sapiens OX=9606 GN=CAVIN1 PE=1 SV=1	-0.16771	7.3324	-1.0912	0.281252	0.836666	-4.94441
sp|P02741|CRP_HUMAN	CRP	C-reactive protein OS=Homo sapiens OX=9606 GN=CRP PE=1 SV=1	0.400422	7.12243	0.885779	0.383535	0.865905	-4.94454
sp|P63173|RL38_HUMAN	RPL38	60S ribosomal protein L38 OS=Homo sapiens OX=9606 GN=RPL38 PE=1 SV=2	-0.293425	7.79613	-1.08914	0.282149	0.836666	-4.94622
sp|P54646|AAPK2_HUMAN	PRKAA2	5'-AMP-activated protein kinase catalytic subunit alpha-2 OS=Homo sapiens OX=9606 GN=PRKAA2 PE=1 SV=2	-0.159337	6.95091	-1.0038	0.322349	0.849357	-4.94637
sp|Q9UI40|NCKX2_HUMAN	SLC24A2	Sodium/potassium/calcium exchanger 2 OS=Homo sapiens OX=9606 GN=SLC24A2 PE=1 SV=1	-0.166011	7.24237	-1.08851	0.282421	0.836666	-4.94677
sp|P60468|SC61B_HUMAN	SEC61B	Protein transport protein Sec61 subunit beta OS=Homo sapiens OX=9606 GN=SEC61B PE=1 SV=2	-0.15938	7.73878	-1.07881	0.286816	0.836666	-4.94699
sp|Q92769|HDAC2_HUMAN	HDAC2	Histone deacetylase 2 OS=Homo sapiens OX=9606 GN=HDAC2 PE=1 SV=2	-0.112921	6.63166	-0.950475	0.349205	0.85897	-4.94735
sp|P19634|SL9A1_HUMAN	SLC9A1	Sodium/hydrogen exchanger 1 OS=Homo sapiens OX=9606 GN=SLC9A1 PE=1 SV=2	0.129495	6.78701	1.07813	0.287117	0.836666	-4.94758
sp|Q8N983|RM43_HUMAN	MRPL43	39S ribosomal protein L43, mitochondrial OS=Homo sapiens OX=9606 GN=MRPL43 PE=1 SV=1	-0.138093	7.58669	-0.97763	0.335354	0.851887	-4.94801
sp|O00178|GTPB1_HUMAN	GTPBP1	GTP-binding protein 1 OS=Homo sapiens OX=9606 GN=GTPBP1 PE=1 SV=3	0.149229	6.78404	1.08661	0.283253	0.836666	-4.94843
sp|P42262|GRIA2_HUMAN	GRIA2	Glutamate receptor 2 OS=Homo sapiens OX=9606 GN=GRIA2 PE=1 SV=3	0.153713	7.68029	1.08596	0.283536	0.836666	-4.949
tr|A0A494C0X7|A0A494C0X7_HUMAN	ITGB2	Integrin beta OS=Homo sapiens OX=9606 GN=ITGB2 PE=1 SV=1	-0.376668	7.49736	-0.827893	0.414968	0.87884	-4.94912
sp|P07900|HS90A_HUMAN	HSP90AA1	Heat shock protein HSP 90-alpha OS=Homo sapiens OX=9606 GN=HSP90AA1 PE=1 SV=5	0.0986098	10.023	1.08562	0.283685	0.836666	-4.9493
sp|Q9BSF4|TIM29_HUMAN	TIMM29	Mitochondrial import inner membrane translocase subunit Tim29 OS=Homo sapiens OX=9606 GN=TIMM29 PE=1 SV=2	0.141602	7.36985	1.07614	0.287995	0.836666	-4.9493
sp|Q9BQ24|ZFY21_HUMAN	ZFYVE21	Zinc finger FYVE domain-containing protein 21 OS=Homo sapiens OX=9606 GN=ZFYVE21 PE=1 SV=1	0.157155	6.30765	1.00969	0.319366	0.848419	-4.94979
sp|Q96RT1|ERBIN_HUMAN	ERBIN	Erbin OS=Homo sapiens OX=9606 GN=ERBIN PE=1 SV=2	-0.166023	6.58894	-1.00951	0.319451	0.848419	-4.94993
sp|Q9NUV9|GIMA4_HUMAN	GIMAP4	GTPase IMAP family member 4 OS=Homo sapiens OX=9606 GN=GIMAP4 PE=1 SV=1	-0.111767	7.25939	-1.06467	0.293243	0.836666	-4.95113
sp|P13521|SCG2_HUMAN	SCG2	Secretogranin-2 OS=Homo sapiens OX=9606 GN=SCG2 PE=1 SV=2	0.253258	7.13044	0.83825	0.409809	0.873923	-4.95114
sp|Q92765|SFRP3_HUMAN	FRZB	Secreted frizzled-related protein 3 OS=Homo sapiens OX=9606 GN=FRZB PE=1 SV=2	-0.209614	7.3303	-1.0544	0.298014	0.839539	-4.9512
sp|Q14194|DPYL1_HUMAN	CRMP1	Dihydropyrimidinase-related protein 1 OS=Homo sapiens OX=9606 GN=CRMP1 PE=1 SV=1	-0.132043	8.74512	-1.08278	0.284932	0.836666	-4.95178
sp|P26006|ITA3_HUMAN	ITGA3	Integrin alpha-3 OS=Homo sapiens OX=9606 GN=ITGA3 PE=1 SV=5	-0.159784	7.49583	-1.08261	0.285006	0.836666	-4.95193
sp|Q9BYJ9|YTHD1_HUMAN	YTHDF1	YTH domain-containing family protein 1 OS=Homo sapiens OX=9606 GN=YTHDF1 PE=1 SV=1	-0.12066	6.99534	-1.07302	0.289377	0.836666	-4.95198
sp|Q9UPN7|PP6R1_HUMAN	PPP6R1	Serine/threonine-protein phosphatase 6 regulatory subunit 1 OS=Homo sapiens OX=9606 GN=PPP6R1 PE=1 SV=5	-0.13196	7.46428	-1.0727	0.289519	0.836666	-4.95226
sp|P01111|RASN_HUMAN	NRAS	GTPase NRas OS=Homo sapiens OX=9606 GN=NRAS PE=1 SV=1	-0.182058	6.78677	-0.876244	0.388333	0.869678	-4.95273
sp|P15144|AMPN_HUMAN	ANPEP	Aminopeptidase N OS=Homo sapiens OX=9606 GN=ANPEP PE=1 SV=4	-0.132047	7.28824	-1.08121	0.285618	0.836666	-4.95314
sp|O14880|MGST3_HUMAN	MGST3	Microsomal glutathione S-transferase 3 OS=Homo sapiens OX=9606 GN=MGST3 PE=1 SV=1	-0.202282	8.51812	-1.03733	0.305958	0.844338	-4.95318
sp|P21964|COMT_HUMAN	COMT	Catechol O-methyltransferase OS=Homo sapiens OX=9606 GN=COMT PE=1 SV=2	-0.135323	6.47898	-1.00779	0.320269	0.848569	-4.95351
sp|Q9H492|MLP3A_HUMAN	MAP1LC3A	Microtubule-associated proteins 1A/1B light chain 3A OS=Homo sapiens OX=9606 GN=MAP1LC3A PE=1 SV=2	-0.30088	8.37162	-1.03689	0.306162	0.844338	-4.95354
sp|P07585|PGS2_HUMAN	DCN	Decorin OS=Homo sapiens OX=9606 GN=DCN PE=1 SV=1	-0.1922	7.31333	-1.08069	0.285849	0.836666	-4.9536
sp|Q01628|IFM3_HUMAN	IFITM3	Interferon-induced transmembrane protein 3 OS=Homo sapiens OX=9606 GN=IFITM3 PE=1 SV=2	-0.288139	7.04106	-0.972616	0.337597	0.855321	-4.95376
sp|Q9Y6J0|CABIN_HUMAN	CABIN1	Calcineurin-binding protein cabin-1 OS=Homo sapiens OX=9606 GN=CABIN1 PE=1 SV=1	0.151799	7.52894	0.981681	0.333176	0.851073	-4.95451
sp|Q13618|CUL3_HUMAN	CUL3	Cullin-3 OS=Homo sapiens OX=9606 GN=CUL3 PE=1 SV=2	0.11046	7.32566	1.07943	0.286403	0.836666	-4.95469
sp|Q5VW32|BROX_HUMAN	BROX	BRO1 domain-containing protein BROX OS=Homo sapiens OX=9606 GN=BROX PE=1 SV=1	0.159545	7.07489	1.07933	0.286447	0.836666	-4.95478
sp|Q99807|COQ7_HUMAN	COQ7	5-demethoxyubiquinone hydroxylase, mitochondrial OS=Homo sapiens OX=9606 GN=COQ7 PE=1 SV=3	-0.146849	6.80673	-0.97081	0.338483	0.85604	-4.9551
sp|P22059|OSBP1_HUMAN	OSBP	Oxysterol-binding protein 1 OS=Homo sapiens OX=9606 GN=OSBP PE=1 SV=1	-0.102657	7.27085	-1.07893	0.286625	0.836666	-4.95513
sp|Q8IYB8|SUV3_HUMAN	SUPV3L1	ATP-dependent RNA helicase SUPV3L1, mitochondrial OS=Homo sapiens OX=9606 GN=SUPV3L1 PE=1 SV=1	0.140943	6.55394	1.06781	0.291694	0.836666	-4.95645
sp|P17980|PRS6A_HUMAN	PSMC3	26S proteasome regulatory subunit 6A OS=Homo sapiens OX=9606 GN=PSMC3 PE=1 SV=3	-0.069686	7.38596	-1.07718	0.287395	0.836666	-4.95664
sp|P08238|HS90B_HUMAN	HSP90AB1	Heat shock protein HSP 90-beta OS=Homo sapiens OX=9606 GN=HSP90AB1 PE=1 SV=4	0.0874059	10.0262	1.07716	0.287402	0.836666	-4.95666
sp|P53597|SUCA_HUMAN	SUCLG1	Succinate--CoA ligase [ADP/GDP-forming] subunit alpha, mitochondrial OS=Homo sapiens OX=9606 GN=SUCLG1 PE=1 SV=4	0.148325	8.15532	1.07585	0.287981	0.836666	-4.95779
sp|Q9NPB8|GPCP1_HUMAN	GPCPD1	Glycerophosphocholine phosphodiesterase GPCPD1 OS=Homo sapiens OX=9606 GN=GPCPD1 PE=1 SV=2	0.184889	6.55114	0.802164	0.430304	0.880793	-4.95823
sp|P08493|MGP_HUMAN	MGP	Matrix Gla protein OS=Homo sapiens OX=9606 GN=MGP PE=1 SV=2	-0.197513	7.55616	-1.035	0.307032	0.844338	-4.95891
sp|P28676|GRAN_HUMAN	GCA	Grancalcin OS=Homo sapiens OX=9606 GN=GCA PE=1 SV=2	0.164944	7.03509	1.07443	0.288612	0.836666	-4.95903
sp|P08195|4F2_HUMAN	SLC3A2	4F2 cell-surface antigen heavy chain OS=Homo sapiens OX=9606 GN=SLC3A2 PE=1 SV=3	0.101324	9.6294	1.07361	0.288975	0.836666	-4.95973
sp|P63027|VAMP2_HUMAN	VAMP2	Vesicle-associated membrane protein 2 OS=Homo sapiens OX=9606 GN=VAMP2 PE=1 SV=3	-0.158153	9.11835	-1.07249	0.289473	0.836666	-4.96071
sp|P09496|CLCA_HUMAN	CLTA	Clathrin light chain A OS=Homo sapiens OX=9606 GN=CLTA PE=1 SV=1	-0.153489	10.3279	-1.07202	0.289679	0.836666	-4.96111
sp|O14786|NRP1_HUMAN	NRP1	Neuropilin-1 OS=Homo sapiens OX=9606 GN=NRP1 PE=1 SV=3	-0.147876	6.84372	-0.972242	0.337781	0.855321	-4.96157
sp|P09104|ENOG_HUMAN	ENO2	Gamma-enolase OS=Homo sapiens OX=9606 GN=ENO2 PE=1 SV=3	0.175529	10.085	1.07141	0.289952	0.836666	-4.96164
sp|O95825|QORL1_HUMAN	CRYZL1	Quinone oxidoreductase-like protein 1 OS=Homo sapiens OX=9606 GN=CRYZL1 PE=1 SV=2	-0.109751	7.0756	-0.930081	0.359498	0.859043	-4.96172
sp|P62633|CNBP_HUMAN	CNBP	CCHC-type zinc finger nucleic acid binding protein OS=Homo sapiens OX=9606 GN=CNBP PE=1 SV=1	-0.150791	6.4051	-0.984796	0.331468	0.851073	-4.9621
sp|P43487|RANG_HUMAN	RANBP1	Ran-specific GTPase-activating protein OS=Homo sapiens OX=9606 GN=RANBP1 PE=1 SV=1	0.140055	8.32205	1.07063	0.290296	0.836666	-4.9623
sp|Q9UHJ6|SHPK_HUMAN	SHPK	Sedoheptulokinase OS=Homo sapiens OX=9606 GN=SHPK PE=1 SV=4	0.241511	5.90697	0.81792	0.421107	0.879437	-4.96304
sp|P25398|RS12_HUMAN	RPS12	40S ribosomal protein S12 OS=Homo sapiens OX=9606 GN=RPS12 PE=1 SV=3	-0.124137	7.92588	-1.06952	0.29079	0.836666	-4.96326
sp|O75363|BCAS1_HUMAN	BCAS1	Breast carcinoma-amplified sequence 1 OS=Homo sapiens OX=9606 GN=BCAS1 PE=1 SV=2	-0.186868	7.71254	-1.06916	0.290952	0.836666	-4.96357
sp|P07858|CATB_HUMAN	CTSB	Cathepsin B OS=Homo sapiens OX=9606 GN=CTSB PE=1 SV=3	0.119465	8.25691	1.06911	0.290975	0.836666	-4.96362
sp|Q969G6|RIFK_HUMAN	RFK	Riboflavin kinase OS=Homo sapiens OX=9606 GN=RFK PE=1 SV=2	0.173374	7.49398	1.00692	0.320499	0.848569	-4.96364
sp|Q6FI81|CPIN1_HUMAN	CIAPIN1	Anamorsin OS=Homo sapiens OX=9606 GN=CIAPIN1 PE=1 SV=2	-0.0901928	7.17605	-1.06865	0.29118	0.836666	-4.96401
sp|P55769|NH2L1_HUMAN	SNU13	NHP2-like protein 1 OS=Homo sapiens OX=9606 GN=SNU13 PE=1 SV=3	0.118299	7.19476	1.06836	0.291308	0.836666	-4.96426
sp|O75122|CLAP2_HUMAN	CLASP2	CLIP-associating protein 2 OS=Homo sapiens OX=9606 GN=CLASP2 PE=1 SV=3	0.0902079	7.07139	1.06835	0.291312	0.836666	-4.96427
sp|Q16401|PSMD5_HUMAN	PSMD5	26S proteasome non-ATPase regulatory subunit 5 OS=Homo sapiens OX=9606 GN=PSMD5 PE=1 SV=3	-0.0952006	7.0907	-1.06831	0.291331	0.836666	-4.96431
sp|Q13491|GPM6B_HUMAN	GPM6B	Neuronal membrane glycoprotein M6-b OS=Homo sapiens OX=9606 GN=GPM6B PE=1 SV=2	-0.163968	9.00208	-1.0679	0.291516	0.836666	-4.96466
sp|Q92896|GSLG1_HUMAN	GLG1	Golgi apparatus protein 1 OS=Homo sapiens OX=9606 GN=GLG1 PE=1 SV=2	-0.132859	7.71758	-1.06785	0.291537	0.836666	-4.9647
sp|P10599|THIO_HUMAN	TXN	Thioredoxin OS=Homo sapiens OX=9606 GN=TXN PE=1 SV=3	-0.130451	9.1194	-1.06778	0.291565	0.836666	-4.96476
sp|Q16762|THTR_HUMAN	TST	Thiosulfate sulfurtransferase OS=Homo sapiens OX=9606 GN=TST PE=1 SV=4	0.173233	6.88702	0.826085	0.415976	0.87884	-4.96498
sp|P24752|THIL_HUMAN	ACAT1	Acetyl-CoA acetyltransferase, mitochondrial OS=Homo sapiens OX=9606 GN=ACAT1 PE=1 SV=1	0.14738	7.2477	1.06752	0.291682	0.836666	-4.96498
sp|Q8ND76|CCNY_HUMAN	CCNY	Cyclin-Y OS=Homo sapiens OX=9606 GN=CCNY PE=1 SV=2	-0.196877	6.68743	-0.99004	0.328748	0.851073	-4.96502
sp|Q7Z4H3|HDDC2_HUMAN	HDDC2	5'-deoxynucleotidase HDDC2 OS=Homo sapiens OX=9606 GN=HDDC2 PE=1 SV=1	-0.227403	6.69582	-0.873525	0.389787	0.869678	-4.96562
sp|Q7Z7E8|UB2Q1_HUMAN	UBE2Q1	Ubiquitin-conjugating enzyme E2 Q1 OS=Homo sapiens OX=9606 GN=UBE2Q1 PE=1 SV=1	-0.132843	6.34015	-0.965351	0.340978	0.856139	-4.96591
sp|Q9BUL8|PDC10_HUMAN	PDCD10	Programmed cell death protein 10 OS=Homo sapiens OX=9606 GN=PDCD10 PE=1 SV=1	-0.136516	7.26763	-0.824098	0.417084	0.87884	-4.96615
sp|Q9BT88|SYT11_HUMAN	SYT11	Synaptotagmin-11 OS=Homo sapiens OX=9606 GN=SYT11 PE=1 SV=2	0.103521	7.06624	1.06529	0.29268	0.836666	-4.9669
sp|Q9HAV7|GRPE1_HUMAN	GRPEL1	GrpE protein homolog 1, mitochondrial OS=Homo sapiens OX=9606 GN=GRPEL1 PE=1 SV=2	0.186689	6.63725	1.06515	0.292743	0.836666	-4.96702
sp|Q8NHL6|LIRB1_HUMAN	LILRB1	Leukocyte immunoglobulin-like receptor subfamily B member 1 OS=Homo sapiens OX=9606 GN=LILRB1 PE=1 SV=1	-0.134729	6.58899	-1.0551	0.297399	0.838702	-4.96727
sp|Q9NQW6|ANLN_HUMAN	ANLN	Anillin OS=Homo sapiens OX=9606 GN=ANLN PE=1 SV=2	0.153097	7.56138	1.06476	0.292916	0.836666	-4.96736
sp|O14994|SYN3_HUMAN	SYN3	Synapsin-3 OS=Homo sapiens OX=9606 GN=SYN3 PE=1 SV=2	0.109596	7.57254	1.06462	0.292979	0.836666	-4.96748
sp|P42766|RL35_HUMAN	RPL35	60S ribosomal protein L35 OS=Homo sapiens OX=9606 GN=RPL35 PE=1 SV=2	-0.150462	8.63805	-1.06458	0.292995	0.836666	-4.96751
sp|Q8IYI6|EXOC8_HUMAN	EXOC8	Exocyst complex component 8 OS=Homo sapiens OX=9606 GN=EXOC8 PE=1 SV=2	-0.0857358	6.87805	-1.06458	0.292997	0.836666	-4.96751
sp|Q63HM9|PLCX3_HUMAN	PLCXD3	PI-PLC X domain-containing protein 3 OS=Homo sapiens OX=9606 GN=PLCXD3 PE=1 SV=2	0.326991	5.96813	0.805179	0.427482	0.879926	-4.96782
tr|A0A8I5KZ38|A0A8I5KZ38_HUMAN	MYH10	Myosin heavy chain 10 OS=Homo sapiens OX=9606 GN=MYH10 PE=1 SV=1	-0.159321	7.91027	-1.06397	0.293272	0.836666	-4.96804
sp|O43556|SGCE_HUMAN	SGCE	Epsilon-sarcoglycan OS=Homo sapiens OX=9606 GN=SGCE PE=1 SV=6	-0.154524	6.85568	-1.06367	0.293406	0.836666	-4.96829
sp|O14949|QCR8_HUMAN	UQCRQ	Cytochrome b-c1 complex subunit 8 OS=Homo sapiens OX=9606 GN=UQCRQ PE=1 SV=4	-0.158786	8.83653	-1.0623	0.294019	0.83759	-4.96946
sp|Q9Y2E4|DIP2C_HUMAN	DIP2C	Disco-interacting protein 2 homolog C OS=Homo sapiens OX=9606 GN=DIP2C PE=1 SV=2	-0.0917915	7.08672	-1.06173	0.294274	0.83759	-4.96995
sp|P62834|RAP1A_HUMAN	RAP1A	Ras-related protein Rap-1A OS=Homo sapiens OX=9606 GN=RAP1A PE=1 SV=1	0.0824955	8.90916	1.06113	0.294545	0.83759	-4.97047
sp|O14548|COX7R_HUMAN	COX7A2L	Cytochrome c oxidase subunit 7A-related protein, mitochondrial OS=Homo sapiens OX=9606 GN=COX7A2L PE=1 SV=2	-0.170049	8.69278	-1.06112	0.294548	0.83759	-4.97047
sp|A7KAX9|RHG32_HUMAN	ARHGAP32	Rho GTPase-activating protein 32 OS=Homo sapiens OX=9606 GN=ARHGAP32 PE=1 SV=1	0.199138	7.41519	1.02863	0.309824	0.845003	-4.97067
sp|Q13277|STX3_HUMAN	STX3	Syntaxin-3 OS=Homo sapiens OX=9606 GN=STX3 PE=1 SV=3	-0.126297	6.65733	-0.946423	0.350796	0.85897	-4.97086
sp|P00352|AL1A1_HUMAN	ALDH1A1	Aldehyde dehydrogenase 1A1 OS=Homo sapiens OX=9606 GN=ALDH1A1 PE=1 SV=2	0.167718	7.6207	1.05913	0.295444	0.838616	-4.97217
sp|Q96LJ7|DHRS1_HUMAN	DHRS1	Dehydrogenase/reductase SDR family member 1 OS=Homo sapiens OX=9606 GN=DHRS1 PE=1 SV=1	-0.211067	6.60246	-1.01845	0.314729	0.846183	-4.97233
sp|Q14642|I5P1_HUMAN	INPP5A	Inositol polyphosphate-5-phosphatase A OS=Homo sapiens OX=9606 GN=INPP5A PE=1 SV=1	-0.0970823	7.49596	-1.05892	0.29554	0.838616	-4.97236
sp|Q9NR28|DBLOH_HUMAN	DIABLO	Diablo IAP-binding mitochondrial protein OS=Homo sapiens OX=9606 GN=DIABLO PE=1 SV=1	0.12754	7.48787	1.04876	0.300277	0.839539	-4.97262
sp|Q92882|OSTF1_HUMAN	OSTF1	Osteoclast-stimulating factor 1 OS=Homo sapiens OX=9606 GN=OSTF1 PE=1 SV=2	-0.106568	7.28168	-0.911803	0.368891	0.859967	-4.97283
sp|O43707|ACTN4_HUMAN	ACTN4	Alpha-actinin-4 OS=Homo sapiens OX=9606 GN=ACTN4 PE=1 SV=2	0.136985	7.79265	1.05808	0.295918	0.838616	-4.97307
sp|Q9Y2H9|MAST1_HUMAN	MAST1	Microtubule-associated serine/threonine-protein kinase 1 OS=Homo sapiens OX=9606 GN=MAST1 PE=1 SV=2	-0.126897	7.48955	-0.811812	0.423978	0.879437	-4.9733
sp|Q13148|TADBP_HUMAN	TARDBP	TAR DNA-binding protein 43 OS=Homo sapiens OX=9606 GN=TARDBP PE=1 SV=1	-0.106115	7.26361	-1.0473	0.300941	0.839539	-4.97385
sp|O95352|ATG7_HUMAN	ATG7	Ubiquitin-like modifier-activating enzyme ATG7 OS=Homo sapiens OX=9606 GN=ATG7 PE=1 SV=1	0.0866975	7.15325	1.05688	0.296458	0.838616	-4.9741
sp|Q99598|TSNAX_HUMAN	TSNAX	Translin-associated protein X OS=Homo sapiens OX=9606 GN=TSNAX PE=1 SV=1	0.155967	6.38599	0.991632	0.327804	0.851073	-4.97452
sp|O75976|CBPD_HUMAN	CPD	Carboxypeptidase D OS=Homo sapiens OX=9606 GN=CPD PE=1 SV=2	0.142692	7.13966	1.05633	0.296703	0.838616	-4.97456
sp|P30740|ILEU_HUMAN	SERPINB1	Leukocyte elastase inhibitor OS=Homo sapiens OX=9606 GN=SERPINB1 PE=1 SV=1	0.104395	7.21151	1.05628	0.296727	0.838616	-4.9746
sp|P08247|SYPH_HUMAN	SYP	Synaptophysin OS=Homo sapiens OX=9606 GN=SYP PE=1 SV=3	-0.240124	10.9138	-1.05622	0.296754	0.838616	-4.97465
sp|Q08357|S20A2_HUMAN	SLC20A2	Sodium-dependent phosphate transporter 2 OS=Homo sapiens OX=9606 GN=SLC20A2 PE=1 SV=1	-0.142464	7.8781	-1.04577	0.301636	0.839539	-4.97513
sp|Q14108|SCRB2_HUMAN	SCARB2	Lysosome membrane protein 2 OS=Homo sapiens OX=9606 GN=SCARB2 PE=1 SV=2	0.107945	9.49062	1.05558	0.297046	0.838702	-4.9752
sp|O95490|AGRL2_HUMAN	ADGRL2	Adhesion G protein-coupled receptor L2 OS=Homo sapiens OX=9606 GN=ADGRL2 PE=1 SV=2	-0.158842	6.39071	-0.9604	0.343427	0.856139	-4.97563
sp|Q9BVJ7|DUS23_HUMAN	DUSP23	Dual specificity protein phosphatase 23 OS=Homo sapiens OX=9606 GN=DUSP23 PE=1 SV=1	-0.132296	7.61522	-1.02468	0.311661	0.846183	-4.97573
sp|Q9NXD2|MTMRA_HUMAN	MTMR10	Myotubularin-related protein 10 OS=Homo sapiens OX=9606 GN=MTMR10 PE=1 SV=3	0.134932	6.59427	1.04498	0.301996	0.839539	-4.97579
sp|P12429|ANXA3_HUMAN	ANXA3	Annexin A3 OS=Homo sapiens OX=9606 GN=ANXA3 PE=1 SV=3	-0.163998	7.93365	-1.05488	0.297361	0.838702	-4.9758
sp|Q8WZA2|RPGF4_HUMAN	RAPGEF4	Rap guanine nucleotide exchange factor 4 OS=Homo sapiens OX=9606 GN=RAPGEF4 PE=1 SV=1	-0.16308	6.56544	-0.969339	0.33883	0.856139	-4.97618
sp|Q15165|PON2_HUMAN	PON2	Serum paraoxonase/arylesterase 2 OS=Homo sapiens OX=9606 GN=PON2 PE=1 SV=4	0.164457	8.69205	1.05193	0.298698	0.839539	-4.9783
sp|Q13451|FKBP5_HUMAN	FKBP5	Peptidyl-prolyl cis-trans isomerase FKBP5 OS=Homo sapiens OX=9606 GN=FKBP5 PE=1 SV=2	-0.119339	6.68461	-1.05186	0.298726	0.839539	-4.97836
sp|P21953|ODBB_HUMAN	BCKDHB	2-oxoisovalerate dehydrogenase subunit beta, mitochondrial OS=Homo sapiens OX=9606 GN=BCKDHB PE=1 SV=2	0.192025	6.86636	0.971925	0.337559	0.855321	-4.97881
sp|P11021|BIP_HUMAN	HSPA5	Endoplasmic reticulum chaperone BiP OS=Homo sapiens OX=9606 GN=HSPA5 PE=1 SV=2	0.165427	7.68444	1.05059	0.299305	0.839539	-4.97944
sp|P63220|RS21_HUMAN	RPS21	40S ribosomal protein S21 OS=Homo sapiens OX=9606 GN=RPS21 PE=1 SV=1	-0.212722	8.12647	-1.01765	0.314946	0.846183	-4.97958
sp|Q01484|ANK2_HUMAN	ANK2	Ankyrin-2 OS=Homo sapiens OX=9606 GN=ANK2 PE=1 SV=4	0.0721423	8.06129	1.05016	0.2995	0.839539	-4.9798
sp|P14209|CD99_HUMAN	CD99	CD99 antigen OS=Homo sapiens OX=9606 GN=CD99 PE=1 SV=1	-0.331486	8.32356	-1.0501	0.299526	0.839539	-4.97985
sp|P22694|KAPCB_HUMAN	PRKACB	cAMP-dependent protein kinase catalytic subunit beta OS=Homo sapiens OX=9606 GN=PRKACB PE=1 SV=2	-0.0608448	8.19312	-1.04935	0.299868	0.839539	-4.98049
sp|Q9BZL1|UBL5_HUMAN	UBL5	Ubiquitin-like protein 5 OS=Homo sapiens OX=9606 GN=UBL5 PE=1 SV=1	-0.111133	6.88057	-0.983665	0.331656	0.851073	-4.98067
sp|Q13424|SNTA1_HUMAN	SNTA1	Alpha-1-syntrophin OS=Homo sapiens OX=9606 GN=SNTA1 PE=1 SV=1	0.110697	7.93976	1.04806	0.300456	0.839539	-4.98158
sp|Q14242|SELPL_HUMAN	SELPLG	P-selectin glycoprotein ligand 1 OS=Homo sapiens OX=9606 GN=SELPLG PE=1 SV=1	-0.270501	8.97427	-1.02757	0.310165	0.845003	-4.98211
sp|Q9NZM1|MYOF_HUMAN	MYOF	Myoferlin OS=Homo sapiens OX=9606 GN=MYOF PE=1 SV=1	-0.175787	7.7243	-1.04734	0.300784	0.839539	-4.98219
sp|Q9NVH6|TMLH_HUMAN	TMLHE	Trimethyllysine dioxygenase, mitochondrial OS=Homo sapiens OX=9606 GN=TMLHE PE=1 SV=1	0.136512	6.94133	1.00558	0.320805	0.848569	-4.98263
sp|O75317|UBP12_HUMAN	USP12	Ubiquitin carboxyl-terminal hydrolase 12 OS=Homo sapiens OX=9606 GN=USP12 PE=1 SV=2	0.129246	5.89956	1.00476	0.321192	0.848618	-4.98328
sp|P51808|DYLT3_HUMAN	DYNLT3	Dynein light chain Tctex-type 3 OS=Homo sapiens OX=9606 GN=DYNLT3 PE=1 SV=1	-0.0972765	8.70926	-1.04577	0.301499	0.839539	-4.98351
sp|Q9BTX7|TTPAL_HUMAN	TTPAL	Alpha-tocopherol transfer protein-like OS=Homo sapiens OX=9606 GN=TTPAL PE=1 SV=2	0.193687	6.10284	0.803699	0.428836	0.880793	-4.98355
sp|P25788|PSA3_HUMAN	PSMA3	Proteasome subunit alpha type-3 OS=Homo sapiens OX=9606 GN=PSMA3 PE=1 SV=2	-0.137082	8.32177	-1.04547	0.301637	0.839539	-4.98376
sp|Q13393|PLD1_HUMAN	PLD1	Phospholipase D1 OS=Homo sapiens OX=9606 GN=PLD1 PE=1 SV=1	0.14519	6.90781	1.04543	0.301654	0.839539	-4.9838
sp|Q9Y286|SIGL7_HUMAN	SIGLEC7	Sialic acid-binding Ig-like lectin 7 OS=Homo sapiens OX=9606 GN=SIGLEC7 PE=1 SV=1	0.195248	7.47408	0.81034	0.424809	0.879437	-4.98458
sp|Q16581|C3AR_HUMAN	C3AR1	C3a anaphylatoxin chemotactic receptor OS=Homo sapiens OX=9606 GN=C3AR1 PE=1 SV=2	-0.244239	6.36078	-0.939879	0.353894	0.85897	-4.98531
sp|P31321|KAP1_HUMAN	PRKAR1B	cAMP-dependent protein kinase type I-beta regulatory subunit OS=Homo sapiens OX=9606 GN=PRKAR1B PE=1 SV=4	0.133733	7.05808	1.02347	0.312076	0.846183	-4.98547
sp|P09486|SPRC_HUMAN	SPARC	SPARC OS=Homo sapiens OX=9606 GN=SPARC PE=1 SV=1	-0.199908	7.70993	-1.04258	0.302958	0.841618	-4.9862
sp|Q9Y6T7|DGKB_HUMAN	DGKB	Diacylglycerol kinase beta OS=Homo sapiens OX=9606 GN=DGKB PE=1 SV=2	-0.135534	6.73442	-0.904366	0.372543	0.859967	-4.98684
sp|Q6UX71|PXDC2_HUMAN	PLXDC2	Plexin domain-containing protein 2 OS=Homo sapiens OX=9606 GN=PLXDC2 PE=1 SV=1	-0.136575	6.98704	-1.04021	0.304046	0.843495	-4.98819
sp|O95376|ARI2_HUMAN	ARIH2	E3 ubiquitin-protein ligase ARIH2 OS=Homo sapiens OX=9606 GN=ARIH2 PE=1 SV=1	-0.159679	6.35383	-0.985401	0.330647	0.851073	-4.98929
sp|Q9P0K9|FRS1L_HUMAN	FRRS1L	DOMON domain-containing protein FRRS1L OS=Homo sapiens OX=9606 GN=FRRS1L PE=1 SV=3	-0.159802	7.3493	-1.03763	0.305232	0.844338	-4.99035
sp|Q9Y3P9|RBGP1_HUMAN	RABGAP1	Rab GTPase-activating protein 1 OS=Homo sapiens OX=9606 GN=RABGAP1 PE=1 SV=3	-0.0708887	7.09559	-1.03725	0.305405	0.844338	-4.99067
sp|Q9UBS4|DJB11_HUMAN	DNAJB11	DnaJ homolog subfamily B member 11 OS=Homo sapiens OX=9606 GN=DNAJB11 PE=1 SV=1	-0.120005	7.24112	-1.02676	0.310402	0.845086	-4.99095
sp|O75489|NDUS3_HUMAN	NDUFS3	NADH dehydrogenase [ubiquinone] iron-sulfur protein 3, mitochondrial OS=Homo sapiens OX=9606 GN=NDUFS3 PE=1 SV=1	0.175893	8.47335	1.03553	0.3062	0.844338	-4.99211
sp|Q15120|PDK3_HUMAN	PDK3	[Pyruvate dehydrogenase (acetyl-transferring)] kinase isozyme 3, mitochondrial OS=Homo sapiens OX=9606 GN=PDK3 PE=1 SV=1	-0.126536	6.81839	-1.03493	0.306475	0.844338	-4.99261
sp|Q9HBL7|PLRKT_HUMAN	PLGRKT	Plasminogen receptor (KT) OS=Homo sapiens OX=9606 GN=PLGRKT PE=1 SV=1	-0.170656	7.32833	-1.01424	0.316404	0.846183	-4.99299
sp|P10909|CLUS_HUMAN	CLU	Clusterin OS=Homo sapiens OX=9606 GN=CLU PE=1 SV=1	-0.1075	9.66473	-1.03441	0.306716	0.844338	-4.99304
sp|P43378|PTN9_HUMAN	PTPN9	Tyrosine-protein phosphatase non-receptor type 9 OS=Homo sapiens OX=9606 GN=PTPN9 PE=1 SV=1	-0.141279	6.9685	-1.03412	0.306849	0.844338	-4.99328
sp|Q9C0D0|PHAR1_HUMAN	PHACTR1	Phosphatase and actin regulator 1 OS=Homo sapiens OX=9606 GN=PHACTR1 PE=1 SV=3	-0.123766	7.47746	-1.03374	0.307028	0.844338	-4.99361
sp|P09038|FGF2_HUMAN	FGF2	Fibroblast growth factor 2 OS=Homo sapiens OX=9606 GN=FGF2 PE=1 SV=3	-0.125091	7.42027	-0.991091	0.327738	0.851073	-4.99408
sp|O75477|ERLN1_HUMAN	ERLIN1	Erlin-1 OS=Homo sapiens OX=9606 GN=ERLIN1 PE=1 SV=2	-0.156991	6.96834	-1.03273	0.307492	0.845003	-4.99444
sp|P11274|BCR_HUMAN	BCR	Breakpoint cluster region protein OS=Homo sapiens OX=9606 GN=BCR PE=1 SV=2	0.212899	6.79982	0.990531	0.328008	0.851073	-4.99452
tr|A0A5S8K798|A0A5S8K798_HUMAN	HLA-DRB1	HLA class II histocompatibility antigen, DRB1 beta chain (Fragment) OS=Homo sapiens OX=9606 GN=HLA-DRB1 PE=1 SV=1	-0.240401	8.09571	-0.629794	0.535293	0.916891	-4.99497
sp|P03897|NU3M_HUMAN	MT-ND3	NADH-ubiquinone oxidoreductase chain 3 OS=Homo sapiens OX=9606 GN=MT-ND3 PE=1 SV=1	-0.201532	6.38926	-0.96616	0.340224	0.856139	-4.9951
sp|Q9P2T1|GMPR2_HUMAN	GMPR2	GMP reductase 2 OS=Homo sapiens OX=9606 GN=GMPR2 PE=1 SV=1	-0.124204	7.47518	-1.03174	0.307951	0.845003	-4.99527
sp|Q8TAM6|ERMIN_HUMAN	ERMN	Ermin OS=Homo sapiens OX=9606 GN=ERMN PE=1 SV=1	0.134971	7.03782	1.03145	0.308086	0.845003	-4.99551
sp|P09972|ALDOC_HUMAN	ALDOC	Fructose-bisphosphate aldolase C OS=Homo sapiens OX=9606 GN=ALDOC PE=1 SV=2	-0.134232	10.1346	-1.03141	0.308103	0.845003	-4.99554
sp|Q16718|NDUA5_HUMAN	NDUFA5	NADH dehydrogenase [ubiquinone] 1 alpha subcomplex subunit 5 OS=Homo sapiens OX=9606 GN=NDUFA5 PE=1 SV=3	-0.166805	9.41021	-1.03018	0.308674	0.845003	-4.99657
sp|P28331|NDUS1_HUMAN	NDUFS1	NADH-ubiquinone oxidoreductase 75 kDa subunit, mitochondrial OS=Homo sapiens OX=9606 GN=NDUFS1 PE=1 SV=3	-0.159678	8.84417	-1.02995	0.308782	0.845003	-4.99676
sp|Q06323|PSME1_HUMAN	PSME1	Proteasome activator complex subunit 1 OS=Homo sapiens OX=9606 GN=PSME1 PE=1 SV=1	0.117357	7.42626	1.02983	0.308838	0.845003	-4.99686
sp|Q07812|BAX_HUMAN	BAX	Apoptosis regulator BAX OS=Homo sapiens OX=9606 GN=BAX PE=1 SV=1	0.138181	6.95707	1.01901	0.314023	0.846183	-4.99732
sp|Q14240|IF4A2_HUMAN	EIF4A2	Eukaryotic initiation factor 4A-II OS=Homo sapiens OX=9606 GN=EIF4A2 PE=1 SV=2	0.0705815	8.46585	1.02889	0.309274	0.845003	-4.99764
sp|O00194|RB27B_HUMAN	RAB27B	Ras-related protein Rab-27B OS=Homo sapiens OX=9606 GN=RAB27B PE=1 SV=4	-0.212013	7.55206	-1.0186	0.314215	0.846183	-4.99765
sp|Q9BTE6|AASD1_HUMAN	AARSD1	Alanyl-tRNA editing protein Aarsd1 OS=Homo sapiens OX=9606 GN=AARSD1 PE=1 SV=2	0.143075	7.53853	1.02854	0.309435	0.845003	-4.99793
sp|P23469|PTPRE_HUMAN	PTPRE	Receptor-type tyrosine-protein phosphatase epsilon OS=Homo sapiens OX=9606 GN=PTPRE PE=1 SV=1	0.12608	7.07732	1.02737	0.309979	0.845003	-4.9989
sp|O94985|CSTN1_HUMAN	CLSTN1	Calsyntenin-1 OS=Homo sapiens OX=9606 GN=CLSTN1 PE=1 SV=1	-0.0896695	7.38644	-1.02726	0.310033	0.845003	-4.999
sp|Q9UJX3|APC7_HUMAN	ANAPC7	Anaphase-promoting complex subunit 7 OS=Homo sapiens OX=9606 GN=ANAPC7 PE=1 SV=5	-0.13982	6.05496	-0.903407	0.372842	0.859967	-4.99984
sp|Q6P1X6|CH082_HUMAN	C8orf82	UPF0598 protein C8orf82 OS=Homo sapiens OX=9606 GN=C8orf82 PE=1 SV=2	0.181927	6.77899	0.915795	0.36621	0.859967	-4.9999
sp|O60477|BRNP1_HUMAN	BRINP1	BMP/retinoic acid-inducible neural-specific protein 1 OS=Homo sapiens OX=9606 GN=BRINP1 PE=1 SV=2	-0.118882	7.49062	-0.798045	0.431788	0.880793	-4.99997
sp|Q9NQ34|TMM9B_HUMAN	TMEM9B	Transmembrane protein 9B OS=Homo sapiens OX=9606 GN=TMEM9B PE=1 SV=1	-0.130482	8.11403	-1.0157	0.315576	0.846183	-5.00002
sp|Q08379|GOGA2_HUMAN	GOLGA2	Golgin subfamily A member 2 OS=Homo sapiens OX=9606 GN=GOLGA2 PE=1 SV=3	-0.213451	5.10727	-0.809433	0.425073	0.879437	-5.00126
sp|P16150|LEUK_HUMAN	SPN	Leukosialin OS=Homo sapiens OX=9606 GN=SPN PE=1 SV=1	-0.222753	6.9947	-0.86819	0.391946	0.870919	-5.00197
sp|Q96BW9|TAM41_HUMAN	TAMM41	Phosphatidate cytidylyltransferase, mitochondrial OS=Homo sapiens OX=9606 GN=TAMM41 PE=1 SV=2	0.142224	6.16076	0.965642	0.340316	0.856139	-5.0024
sp|Q96PE5|OPALI_HUMAN	OPALIN	Opalin OS=Homo sapiens OX=9606 GN=OPALIN PE=2 SV=1	0.18212	7.69187	1.02228	0.312357	0.846183	-5.00312
sp|Q8N6C5|IGSF1_HUMAN	IGSF1	Immunoglobulin superfamily member 1 OS=Homo sapiens OX=9606 GN=IGSF1 PE=1 SV=3	0.140268	7.23947	1.02223	0.312377	0.846183	-5.00315
sp|Q9Y3D3|RT16_HUMAN	MRPS16	28S ribosomal protein S16, mitochondrial OS=Homo sapiens OX=9606 GN=MRPS16 PE=1 SV=1	0.127046	5.64701	0.585667	0.564318	0.918772	-5.00336
sp|Q8NDH3|PEPL1_HUMAN	NPEPL1	Probable aminopeptidase NPEPL1 OS=Homo sapiens OX=9606 GN=NPEPL1 PE=1 SV=3	-0.119209	6.96068	-0.95359	0.346467	0.85766	-5.00346
sp|P04181|OAT_HUMAN	OAT	Ornithine aminotransferase, mitochondrial OS=Homo sapiens OX=9606 GN=OAT PE=1 SV=1	0.106031	7.16902	1.02128	0.312822	0.846183	-5.00394
sp|Q96LD4|TRI47_HUMAN	TRIM47	E3 ubiquitin-protein ligase TRIM47 OS=Homo sapiens OX=9606 GN=TRIM47 PE=1 SV=2	0.16885	6.94077	1.02112	0.312898	0.846183	-5.00407
sp|P48960|AGRE5_HUMAN	ADGRE5	Adhesion G protein-coupled receptor E5 OS=Homo sapiens OX=9606 GN=ADGRE5 PE=1 SV=4	-0.197729	6.78485	-1.02066	0.313115	0.846183	-5.00445
sp|Q96B54|ZN428_HUMAN	ZNF428	Zinc finger protein 428 OS=Homo sapiens OX=9606 GN=ZNF428 PE=1 SV=2	-0.138154	6.28835	-0.9124	0.367968	0.859967	-5.00487
sp|Q9UL25|RAB21_HUMAN	RAB21	Ras-related protein Rab-21 OS=Homo sapiens OX=9606 GN=RAB21 PE=1 SV=3	0.100419	7.64087	1.01927	0.313765	0.846183	-5.0056
sp|O75886|STAM2_HUMAN	STAM2	Signal transducing adapter molecule 2 OS=Homo sapiens OX=9606 GN=STAM2 PE=1 SV=1	-0.137794	6.60315	-0.896977	0.376213	0.859967	-5.00563
sp|P16452|EPB42_HUMAN	EPB42	Protein 4.2 OS=Homo sapiens OX=9606 GN=EPB42 PE=1 SV=3	-0.337183	9.3608	-1.01648	0.315074	0.846183	-5.00789
sp|O95183|VAMP5_HUMAN	VAMP5	Vesicle-associated membrane protein 5 OS=Homo sapiens OX=9606 GN=VAMP5 PE=1 SV=1	-0.235657	7.74967	-1.0164	0.315115	0.846183	-5.00796
sp|Q96RU3|FNBP1_HUMAN	FNBP1	Formin-binding protein 1 OS=Homo sapiens OX=9606 GN=FNBP1 PE=1 SV=2	0.103672	7.31957	0.983628	0.331199	0.851073	-5.00853
sp|Q7Z7H5|TMED4_HUMAN	TMED4	Transmembrane emp24 domain-containing protein 4 OS=Homo sapiens OX=9606 GN=TMED4 PE=1 SV=1	0.145559	8.66097	1.01566	0.31546	0.846183	-5.00856
sp|Q9H9C1|SPE39_HUMAN	VIPAS39	Spermatogenesis-defective protein 39 homolog OS=Homo sapiens OX=9606 GN=VIPAS39 PE=1 SV=1	-0.101959	7.20928	-1.01543	0.315569	0.846183	-5.00875
sp|Q9NVA2|SEP11_HUMAN	SEPTIN11	Septin-11 OS=Homo sapiens OX=9606 GN=SEPTIN11 PE=1 SV=3	0.123333	9.02179	1.01533	0.315615	0.846183	-5.00883
sp|Q9UHG2|PCS1N_HUMAN	PCSK1N	ProSAAS OS=Homo sapiens OX=9606 GN=PCSK1N PE=1 SV=1	0.248598	7.84941	1.01468	0.315925	0.846183	-5.00937
sp|Q9H4G0|E41L1_HUMAN	EPB41L1	Band 4.1-like protein 1 OS=Homo sapiens OX=9606 GN=EPB41L1 PE=1 SV=2	0.0787801	7.95529	1.01448	0.31602	0.846183	-5.00954
sp|P62081|RS7_HUMAN	RPS7	40S ribosomal protein S7 OS=Homo sapiens OX=9606 GN=RPS7 PE=1 SV=1	-0.107872	8.09062	-1.01409	0.316203	0.846183	-5.00985
sp|P28799|GRN_HUMAN	GRN	Progranulin OS=Homo sapiens OX=9606 GN=GRN PE=1 SV=2	-0.185421	6.78118	-1.00317	0.321513	0.848795	-5.01019
sp|Q13085|ACACA_HUMAN	ACACA	Acetyl-CoA carboxylase 1 OS=Homo sapiens OX=9606 GN=ACACA PE=1 SV=2	0.0728937	6.9394	1.01315	0.316645	0.846183	-5.01062
sp|Q52LD8|RFTN2_HUMAN	RFTN2	Raftlin-2 OS=Homo sapiens OX=9606 GN=RFTN2 PE=1 SV=3	0.116879	6.81649	1.01309	0.316673	0.846183	-5.01067
sp|P82930|RT34_HUMAN	MRPS34	28S ribosomal protein S34, mitochondrial OS=Homo sapiens OX=9606 GN=MRPS34 PE=1 SV=2	0.17725	7.55356	1.01282	0.316802	0.846183	-5.01089
sp|Q9UHQ4|BAP29_HUMAN	BCAP29	B-cell receptor-associated protein 29 OS=Homo sapiens OX=9606 GN=BCAP29 PE=1 SV=2	-0.134643	7.44631	-1.01169	0.317334	0.8465	-5.01181
sp|P78318|IGBP1_HUMAN	IGBP1	Immunoglobulin-binding protein 1 OS=Homo sapiens OX=9606 GN=IGBP1 PE=1 SV=1	-0.117333	7.18077	-0.817956	0.420035	0.879437	-5.0124
sp|Q00013|EM55_HUMAN	MPP1	55 kDa erythrocyte membrane protein OS=Homo sapiens OX=9606 GN=MPP1 PE=1 SV=2	-0.154923	7.53298	-1.01057	0.317867	0.84737	-5.01274
sp|Q96T83|SL9A7_HUMAN	SLC9A7	Sodium/hydrogen exchanger 7 OS=Homo sapiens OX=9606 GN=SLC9A7 PE=1 SV=1	-0.151406	7.31264	-0.989607	0.32816	0.851073	-5.01274
sp|Q9P232|CNTN3_HUMAN	CNTN3	Contactin-3 OS=Homo sapiens OX=9606 GN=CNTN3 PE=1 SV=3	-0.146864	6.01396	-0.8836	0.383289	0.865905	-5.01336
sp|Q9NR22|ANM8_HUMAN	PRMT8	Protein arginine N-methyltransferase 8 OS=Homo sapiens OX=9606 GN=PRMT8 PE=1 SV=2	-0.191498	6.85997	-0.787709	0.437241	0.886176	-5.01381
sp|P33402|GCYA2_HUMAN	GUCY1A2	Guanylate cyclase soluble subunit alpha-2 OS=Homo sapiens OX=9606 GN=GUCY1A2 PE=1 SV=1	0.0891547	6.87473	1.00863	0.318785	0.848419	-5.01432
sp|Q9UNH7|SNX6_HUMAN	SNX6	Sorting nexin-6 OS=Homo sapiens OX=9606 GN=SNX6 PE=1 SV=1	-0.087004	7.53104	-1.0085	0.318846	0.848419	-5.01442
sp|Q6P1Q0|LTMD1_HUMAN	LETMD1	LETM1 domain-containing protein 1 OS=Homo sapiens OX=9606 GN=LETMD1 PE=1 SV=1	0.143104	7.15114	0.997859	0.324052	0.851073	-5.01447
sp|Q9UBX3|DIC_HUMAN	SLC25A10	Mitochondrial dicarboxylate carrier OS=Homo sapiens OX=9606 GN=SLC25A10 PE=1 SV=2	-0.139017	7.19184	-1.00758	0.319281	0.848419	-5.01517
sp|P43034|LIS1_HUMAN	PAFAH1B1	Platelet-activating factor acetylhydrolase IB subunit beta OS=Homo sapiens OX=9606 GN=PAFAH1B1 PE=1 SV=2	0.0867859	8.24061	1.00668	0.319711	0.848419	-5.0159
sp|Q8IV38|ANKY2_HUMAN	ANKMY2	Ankyrin repeat and MYND domain-containing protein 2 OS=Homo sapiens OX=9606 GN=ANKMY2 PE=1 SV=1	-0.140259	6.83255	-1.00668	0.319712	0.848419	-5.01591
sp|P30837|AL1B1_HUMAN	ALDH1B1	Aldehyde dehydrogenase X, mitochondrial OS=Homo sapiens OX=9606 GN=ALDH1B1 PE=1 SV=4	-0.153283	6.4344	-0.691912	0.495611	0.900948	-5.01597
sp|Q14831|GRM7_HUMAN	GRM7	Metabotropic glutamate receptor 7 OS=Homo sapiens OX=9606 GN=GRM7 PE=1 SV=1	-0.156031	7.348	-0.798396	0.431114	0.880793	-5.01685
sp|Q8N4C8|MINK1_HUMAN	MINK1	Misshapen-like kinase 1 OS=Homo sapiens OX=9606 GN=MINK1 PE=1 SV=2	0.0636149	7.3895	1.00464	0.320679	0.848569	-5.01756
sp|Q14444|CAPR1_HUMAN	CAPRIN1	Caprin-1 OS=Homo sapiens OX=9606 GN=CAPRIN1 PE=1 SV=2	0.0931914	7.26922	1.00449	0.320754	0.848569	-5.01769
sp|Q9BXF6|RFIP5_HUMAN	RAB11FIP5	Rab11 family-interacting protein 5 OS=Homo sapiens OX=9606 GN=RAB11FIP5 PE=1 SV=1	-0.120453	6.86934	-0.993609	0.326093	0.851073	-5.01787
sp|Q9BX66|SRBS1_HUMAN	SORBS1	Sorbin and SH3 domain-containing protein 1 OS=Homo sapiens OX=9606 GN=SORBS1 PE=1 SV=3	0.200115	6.42571	0.780683	0.441522	0.888429	-5.01798
sp|Q7KZI7|MARK2_HUMAN	MARK2	Serine/threonine-protein kinase MARK2 OS=Homo sapiens OX=9606 GN=MARK2 PE=1 SV=2	-0.150711	7.11933	-0.921345	0.36299	0.859967	-5.01836
sp|P48739|PIPNB_HUMAN	PITPNB	Phosphatidylinositol transfer protein beta isoform OS=Homo sapiens OX=9606 GN=PITPNB PE=1 SV=2	-0.0748055	7.57718	-1.00347	0.321239	0.848618	-5.01851
sp|Q14126|DSG2_HUMAN	DSG2	Desmoglein-2 OS=Homo sapiens OX=9606 GN=DSG2 PE=1 SV=2	-0.186918	7.11838	-0.905435	0.371412	0.859967	-5.01889
sp|O60603|TLR2_HUMAN	TLR2	Toll-like receptor 2 OS=Homo sapiens OX=9606 GN=TLR2 PE=1 SV=1	-0.156467	6.90901	-0.991625	0.327049	0.851073	-5.01946
sp|Q9GZT3|SLIRP_HUMAN	SLIRP	SRA stem-loop-interacting RNA-binding protein, mitochondrial OS=Homo sapiens OX=9606 GN=SLIRP PE=1 SV=1	-0.140683	7.23623	-1.00138	0.322237	0.849357	-5.02021
sp|A6NDG6|PGP_HUMAN	PGP	Glycerol-3-phosphate phosphatase OS=Homo sapiens OX=9606 GN=PGP PE=1 SV=1	-0.168459	6.64644	-0.978392	0.333607	0.851073	-5.02068
sp|O15075|DCLK1_HUMAN	DCLK1	Serine/threonine-protein kinase DCLK1 OS=Homo sapiens OX=9606 GN=DCLK1 PE=1 SV=2	0.0612463	7.58373	1.00021	0.322796	0.849634	-5.02116
sp|Q6U841|S4A10_HUMAN	SLC4A10	Sodium-driven chloride bicarbonate exchanger OS=Homo sapiens OX=9606 GN=SLC4A10 PE=1 SV=1	-0.176069	7.14986	-1.00005	0.322869	0.849634	-5.02128
sp|P23470|PTPRG_HUMAN	PTPRG	Receptor-type tyrosine-protein phosphatase gamma OS=Homo sapiens OX=9606 GN=PTPRG PE=1 SV=4	0.182009	5.93135	0.989158	0.32824	0.851073	-5.02142
sp|Q9NR50|EI2BG_HUMAN	EIF2B3	Translation initiation factor eIF-2B subunit gamma OS=Homo sapiens OX=9606 GN=EIF2B3 PE=1 SV=1	0.131534	7.02601	0.976126	0.334716	0.851776	-5.02245
sp|Q99962|SH3G2_HUMAN	SH3GL2	Endophilin-A1 OS=Homo sapiens OX=9606 GN=SH3GL2 PE=1 SV=1	0.11511	8.4286	0.998241	0.323737	0.851073	-5.02274
sp|Q8IXI1|MIRO2_HUMAN	RHOT2	Mitochondrial Rho GTPase 2 OS=Homo sapiens OX=9606 GN=RHOT2 PE=1 SV=2	0.163393	6.42025	0.926676	0.360088	0.859043	-5.0233
sp|P23677|IP3KA_HUMAN	ITPKA	Inositol-trisphosphate 3-kinase A OS=Homo sapiens OX=9606 GN=ITPKA PE=1 SV=1	-0.118756	6.5818	-0.939598	0.353346	0.85897	-5.02404
sp|P15311|EZRI_HUMAN	EZR	Ezrin OS=Homo sapiens OX=9606 GN=EZR PE=1 SV=4	-0.0968017	8.25946	-0.99622	0.324706	0.851073	-5.02437
sp|P62258|1433E_HUMAN	YWHAE	14-3-3 protein epsilon OS=Homo sapiens OX=9606 GN=YWHAE PE=1 SV=1	0.089386	9.20104	0.995735	0.324939	0.851073	-5.02476
sp|P09417|DHPR_HUMAN	QDPR	Dihydropteridine reductase OS=Homo sapiens OX=9606 GN=QDPR PE=1 SV=2	0.167502	9.27521	0.995429	0.325086	0.851073	-5.02501
sp|Q9BVL4|SELO_HUMAN	SELENOO	Protein adenylyltransferase SelO, mitochondrial OS=Homo sapiens OX=9606 GN=SELENOO PE=1 SV=3	-0.0800284	6.85967	-0.553727	0.585331	0.918772	-5.02521
sp|Q86UY8|NT5D3_HUMAN	NT5DC3	5'-nucleotidase domain-containing protein 3 OS=Homo sapiens OX=9606 GN=NT5DC3 PE=1 SV=1	0.100178	7.001	0.716234	0.479979	0.898247	-5.02549
sp|P07919|QCR6_HUMAN	UQCRH	Cytochrome b-c1 complex subunit 6, mitochondrial OS=Homo sapiens OX=9606 GN=UQCRH PE=1 SV=2	-0.15221	9.01782	-0.993662	0.325936	0.851073	-5.02643
sp|O95319|CELF2_HUMAN	CELF2	CUGBP Elav-like family member 2 OS=Homo sapiens OX=9606 GN=CELF2 PE=1 SV=1	-0.130058	5.96309	-0.935921	0.355212	0.85897	-5.02676
sp|Q9H9H5|MA6D1_HUMAN	MAP6D1	MAP6 domain-containing protein 1 OS=Homo sapiens OX=9606 GN=MAP6D1 PE=1 SV=1	-0.173606	7.01899	-0.992864	0.326321	0.851073	-5.02707
sp|Q8WUN7|UBTD2_HUMAN	UBTD2	Ubiquitin domain-containing protein 2 OS=Homo sapiens OX=9606 GN=UBTD2 PE=1 SV=2	0.113375	6.92993	0.631091	0.534182	0.916891	-5.02724
sp|Q92520|FAM3C_HUMAN	FAM3C	Protein FAM3C OS=Homo sapiens OX=9606 GN=FAM3C PE=1 SV=1	-0.217052	8.34279	-0.992469	0.326511	0.851073	-5.02739
sp|Q14624|ITIH4_HUMAN	ITIH4	Inter-alpha-trypsin inhibitor heavy chain H4 OS=Homo sapiens OX=9606 GN=ITIH4 PE=1 SV=4	-0.179032	6.6612	-0.992358	0.326564	0.851073	-5.02748
sp|P27635|RL10_HUMAN	RPL10	60S ribosomal protein L10 OS=Homo sapiens OX=9606 GN=RPL10 PE=1 SV=5	-0.0737582	7.60927	-0.99142	0.327017	0.851073	-5.02823
sp|P25713|MT3_HUMAN	MT3	Metallothionein-3 OS=Homo sapiens OX=9606 GN=MT3 PE=1 SV=1	-0.352922	8.79568	-0.991184	0.327131	0.851073	-5.02842
sp|P61088|UBE2N_HUMAN	UBE2N	Ubiquitin-conjugating enzyme E2 N OS=Homo sapiens OX=9606 GN=UBE2N PE=1 SV=1	0.0957987	8.76741	0.991061	0.32719	0.851073	-5.02852
sp|Q15750|TAB1_HUMAN	TAB1	TGF-beta-activated kinase 1 and MAP3K7-binding protein 1 OS=Homo sapiens OX=9606 GN=TAB1 PE=1 SV=1	-0.0993288	7.81463	-0.979987	0.332694	0.851073	-5.02869
sp|P36959|GMPR1_HUMAN	GMPR	GMP reductase 1 OS=Homo sapiens OX=9606 GN=GMPR PE=1 SV=1	-0.215659	7.6233	-0.890721	0.379148	0.862354	-5.02914
sp|P14384|CBPM_HUMAN	CPM	Carboxypeptidase M OS=Homo sapiens OX=9606 GN=CPM PE=1 SV=2	-0.1689	7.73816	-0.990071	0.327668	0.851073	-5.02931
sp|Q9Y653|AGRG1_HUMAN	ADGRG1	Adhesion G-protein coupled receptor G1 OS=Homo sapiens OX=9606 GN=ADGRG1 PE=1 SV=2	-0.127617	7.54043	-0.98984	0.32778	0.851073	-5.0295
sp|Q8IZU2|WDR17_HUMAN	WDR17	WD repeat-containing protein 17 OS=Homo sapiens OX=9606 GN=WDR17 PE=2 SV=2	-0.110744	6.63545	-0.978423	0.333457	0.851073	-5.02993
sp|Q5VT25|MRCKA_HUMAN	CDC42BPA	Serine/threonine-protein kinase MRCK alpha OS=Homo sapiens OX=9606 GN=CDC42BPA PE=1 SV=1	-0.0953047	6.7799	-0.965537	0.339926	0.856139	-5.03069
sp|O94919|ENDD1_HUMAN	ENDOD1	Endonuclease domain-containing 1 protein OS=Homo sapiens OX=9606 GN=ENDOD1 PE=1 SV=2	0.0940985	8.25225	0.988177	0.328584	0.851073	-5.03083
sp|O43242|PSMD3_HUMAN	PSMD3	26S proteasome non-ATPase regulatory subunit 3 OS=Homo sapiens OX=9606 GN=PSMD3 PE=1 SV=2	-0.0683925	8.01747	-0.987303	0.329007	0.851073	-5.03153
sp|Q86X76|NIT1_HUMAN	NIT1	Deaminated glutathione amidase OS=Homo sapiens OX=9606 GN=NIT1 PE=1 SV=2	-0.112986	7.10302	-0.94063	0.352673	0.85897	-5.03173
sp|P01112|RASH_HUMAN	HRAS	GTPase HRas OS=Homo sapiens OX=9606 GN=HRAS PE=1 SV=1	-0.0911093	8.41754	-0.986856	0.329224	0.851073	-5.03188
sp|Q9H936|GHC1_HUMAN	SLC25A22	Mitochondrial glutamate carrier 1 OS=Homo sapiens OX=9606 GN=SLC25A22 PE=1 SV=1	-0.197971	9.30052	-0.98599	0.329644	0.851073	-5.03257
sp|Q9NRY6|PLS3_HUMAN	PLSCR3	Phospholipid scramblase 3 OS=Homo sapiens OX=9606 GN=PLSCR3 PE=1 SV=2	-0.129831	8.6978	-0.985834	0.329719	0.851073	-5.0327
sp|Q8NHH9|ATLA2_HUMAN	ATL2	Atlastin-2 OS=Homo sapiens OX=9606 GN=ATL2 PE=1 SV=2	0.131992	7.27482	0.962779	0.341292	0.856139	-5.03282
sp|Q8NFA0|UBP32_HUMAN	USP32	Ubiquitin carboxyl-terminal hydrolase 32 OS=Homo sapiens OX=9606 GN=USP32 PE=1 SV=1	-0.158946	6.14234	-0.870422	0.39016	0.869678	-5.0337
sp|Q99719|SEPT5_HUMAN	SEPTIN5	Septin-5 OS=Homo sapiens OX=9606 GN=SEPTIN5 PE=1 SV=1	0.135499	8.48244	0.983602	0.330803	0.851073	-5.03448
sp|Q15814|TBCC_HUMAN	TBCC	Tubulin-specific chaperone C OS=Homo sapiens OX=9606 GN=TBCC PE=1 SV=2	-0.0969253	7.77327	-0.808774	0.424794	0.879437	-5.03468
sp|Q9BT78|CSN4_HUMAN	COPS4	COP9 signalosome complex subunit 4 OS=Homo sapiens OX=9606 GN=COPS4 PE=1 SV=1	0.079942	7.84075	0.983032	0.331081	0.851073	-5.03493
sp|Q86TI2|DPP9_HUMAN	DPP9	Dipeptidyl peptidase 9 OS=Homo sapiens OX=9606 GN=DPP9 PE=1 SV=3	-0.168592	6.96124	-0.91041	0.368487	0.859967	-5.03503
sp|Q9UHN6|CEIP2_HUMAN	CEMIP2	Cell surface hyaluronidase OS=Homo sapiens OX=9606 GN=CEMIP2 PE=1 SV=1	-0.0972187	7.12181	-0.982411	0.331383	0.851073	-5.03543
sp|P27708|PYR1_HUMAN	CAD	CAD protein OS=Homo sapiens OX=9606 GN=CAD PE=1 SV=3	-0.0916643	6.53762	-0.982376	0.3314	0.851073	-5.03545
sp|O43598|DNPH1_HUMAN	DNPH1	2'-deoxynucleoside 5'-phosphate N-hydrolase 1 OS=Homo sapiens OX=9606 GN=DNPH1 PE=1 SV=1	-0.139826	6.79931	-0.77898	0.442285	0.888587	-5.0355
sp|Q15057|ACAP2_HUMAN	ACAP2	Arf-GAP with coiled-coil, ANK repeat and PH domain-containing protein 2 OS=Homo sapiens OX=9606 GN=ACAP2 PE=1 SV=3	-0.11796	6.92688	-0.851851	0.400422	0.870919	-5.03584
sp|Q14571|ITPR2_HUMAN	ITPR2	Inositol 1,4,5-trisphosphate receptor type 2 OS=Homo sapiens OX=9606 GN=ITPR2 PE=1 SV=2	-0.120638	6.92205	-0.98184	0.331661	0.851073	-5.03588
sp|Q92506|DHB8_HUMAN	HSD17B8	(3R)-3-hydroxyacyl-CoA dehydrogenase OS=Homo sapiens OX=9606 GN=HSD17B8 PE=1 SV=2	0.132374	7.08001	0.980466	0.332331	0.851073	-5.03697
sp|P30531|SC6A1_HUMAN	SLC6A1	Sodium- and chloride-dependent GABA transporter 1 OS=Homo sapiens OX=9606 GN=SLC6A1 PE=1 SV=2	0.102774	9.03222	0.98011	0.332505	0.851073	-5.03725
sp|Q14185|DOCK1_HUMAN	DOCK1	Dedicator of cytokinesis protein 1 OS=Homo sapiens OX=9606 GN=DOCK1 PE=1 SV=2	-0.106171	7.08716	-0.979485	0.33281	0.851073	-5.03775
sp|Q9P035|HACD3_HUMAN	HACD3	Very-long-chain (3R)-3-hydroxyacyl-CoA dehydratase 3 OS=Homo sapiens OX=9606 GN=HACD3 PE=1 SV=2	-0.115529	7.87556	-0.979068	0.333013	0.851073	-5.03808
sp|Q02641|CACB1_HUMAN	CACNB1	Voltage-dependent L-type calcium channel subunit beta-1 OS=Homo sapiens OX=9606 GN=CACNB1 PE=1 SV=3	-0.13679	6.75441	-0.932899	0.3566	0.85897	-5.03848
sp|P41222|PTGDS_HUMAN	PTGDS	Prostaglandin-H2 D-isomerase OS=Homo sapiens OX=9606 GN=PTGDS PE=1 SV=1	0.189437	7.86802	0.977864	0.333602	0.851073	-5.03903
sp|Q92783|STAM1_HUMAN	STAM	Signal transducing adapter molecule 1 OS=Homo sapiens OX=9606 GN=STAM PE=1 SV=3	0.122598	6.78156	0.977283	0.333886	0.851111	-5.03949
sp|Q96K17|BT3L4_HUMAN	BTF3L4	Transcription factor BTF3 homolog 4 OS=Homo sapiens OX=9606 GN=BTF3L4 PE=1 SV=1	-0.196976	7.03649	-0.953608	0.34586	0.857213	-5.03987
sp|P08559|ODPA_HUMAN	PDHA1	Pyruvate dehydrogenase E1 component subunit alpha, somatic form, mitochondrial OS=Homo sapiens OX=9606 GN=PDHA1 PE=1 SV=3	0.112959	7.93581	0.976662	0.334189	0.851111	-5.03998
sp|P35609|ACTN2_HUMAN	ACTN2	Alpha-actinin-2 OS=Homo sapiens OX=9606 GN=ACTN2 PE=1 SV=1	0.110377	7.43426	0.976547	0.334246	0.851111	-5.04008
sp|Q92581|SL9A6_HUMAN	SLC9A6	Sodium/hydrogen exchanger 6 OS=Homo sapiens OX=9606 GN=SLC9A6 PE=1 SV=3	-0.141995	7.26604	-0.974226	0.335384	0.851887	-5.04191
sp|P60983|GMFB_HUMAN	GMFB	Glia maturation factor beta OS=Homo sapiens OX=9606 GN=GMFB PE=1 SV=2	-0.140553	7.5782	-0.96291	0.341094	0.856139	-5.04206
sp|P51692|STA5B_HUMAN	STAT5B	Signal transducer and activator of transcription 5B OS=Homo sapiens OX=9606 GN=STAT5B PE=1 SV=2	-0.094978	6.86013	-0.97063	0.337151	0.855321	-5.04474
sp|O75643|U520_HUMAN	SNRNP200	U5 small nuclear ribonucleoprotein 200 kDa helicase OS=Homo sapiens OX=9606 GN=SNRNP200 PE=1 SV=2	0.155075	6.42427	0.922568	0.361893	0.859967	-5.04509
sp|O95278|EPM2A_HUMAN	EPM2A	Laforin OS=Homo sapiens OX=9606 GN=EPM2A PE=1 SV=2	-0.0995032	7.23588	-0.522735	0.606141	0.929292	-5.04516
sp|Q9UBV2|SE1L1_HUMAN	SEL1L	Protein sel-1 homolog 1 OS=Homo sapiens OX=9606 GN=SEL1L PE=1 SV=3	-0.141868	7.08737	-0.969589	0.337664	0.855321	-5.04556
sp|Q9UNN5|FAF1_HUMAN	FAF1	FAS-associated factor 1 OS=Homo sapiens OX=9606 GN=FAF1 PE=1 SV=2	0.123412	6.60684	0.958195	0.343438	0.856139	-5.04571
sp|Q13510|ASAH1_HUMAN	ASAH1	Acid ceramidase OS=Homo sapiens OX=9606 GN=ASAH1 PE=1 SV=5	0.121202	8.66171	0.968193	0.338352	0.85604	-5.04665
sp|Q9H2H8|PPIL3_HUMAN	PPIL3	Peptidyl-prolyl cis-trans isomerase-like 3 OS=Homo sapiens OX=9606 GN=PPIL3 PE=1 SV=1	0.106626	7.00029	0.956898	0.344084	0.856139	-5.04671
sp|Q14244|MAP7_HUMAN	MAP7	Ensconsin OS=Homo sapiens OX=9606 GN=MAP7 PE=1 SV=1	0.120539	7.03247	0.612029	0.546255	0.918772	-5.04716
sp|Q9BQA9|CYBC1_HUMAN	CYBC1	Cytochrome b-245 chaperone 1 OS=Homo sapiens OX=9606 GN=CYBC1 PE=1 SV=1	-0.141816	7.41603	-0.96601	0.339431	0.856139	-5.04836
sp|Q9NX62|IMPA3_HUMAN	BPNT2	Golgi-resident adenosine 3',5'-bisphosphate 3'-phosphatase OS=Homo sapiens OX=9606 GN=BPNT2 PE=1 SV=1	-0.177756	7.22817	-0.965959	0.339457	0.856139	-5.0484
sp|Q7Z5G4|GOGA7_HUMAN	GOLGA7	Golgin subfamily A member 7 OS=Homo sapiens OX=9606 GN=GOLGA7 PE=1 SV=2	0.0883267	8.96853	0.96575	0.33956	0.856139	-5.04857
sp|Q9UK41|VPS28_HUMAN	VPS28	Vacuolar protein sorting-associated protein 28 homolog OS=Homo sapiens OX=9606 GN=VPS28 PE=1 SV=1	0.0892565	6.77082	0.954312	0.345376	0.857053	-5.04871
sp|O75821|EIF3G_HUMAN	EIF3G	Eukaryotic translation initiation factor 3 subunit G OS=Homo sapiens OX=9606 GN=EIF3G PE=1 SV=2	-0.108356	6.53351	-0.709219	0.484036	0.899421	-5.04891
sp|Q9BZH6|WDR11_HUMAN	WDR11	WD repeat-containing protein 11 OS=Homo sapiens OX=9606 GN=WDR11 PE=1 SV=1	-0.0859312	6.82193	-0.942489	0.351452	0.85897	-5.04924
sp|O95976|IGSF6_HUMAN	IGSF6	Immunoglobulin superfamily member 6 OS=Homo sapiens OX=9606 GN=IGSF6 PE=2 SV=2	-0.166803	6.32911	-0.904284	0.371531	0.859967	-5.04976
sp|P01903|DRA_HUMAN	HLA-DRA	HLA class II histocompatibility antigen, DR alpha chain OS=Homo sapiens OX=9606 GN=HLA-DRA PE=1 SV=2	0.208744	6.87175	0.964087	0.340383	0.856139	-5.04987
sp|P41217|OX2G_HUMAN	CD200	OX-2 membrane glycoprotein OS=Homo sapiens OX=9606 GN=CD200 PE=1 SV=4	0.193121	8.36034	0.963576	0.340637	0.856139	-5.05027
sp|Q4KMQ2|ANO6_HUMAN	ANO6	Anoctamin-6 OS=Homo sapiens OX=9606 GN=ANO6 PE=1 SV=2	-0.125858	7.42576	-0.961726	0.341555	0.856139	-5.05171
sp|Q9Y693|LHPL6_HUMAN	LHFPL6	LHFPL tetraspan subfamily member 6 protein OS=Homo sapiens OX=9606 GN=LHFPL6 PE=2 SV=1	-0.0973065	6.32024	-0.401256	0.692089	0.944057	-5.05187
sp|Q9UK22|FBX2_HUMAN	FBXO2	F-box only protein 2 OS=Homo sapiens OX=9606 GN=FBXO2 PE=1 SV=2	0.133144	8.62271	0.961099	0.341866	0.856139	-5.0522
sp|P09651|ROA1_HUMAN	HNRNPA1	Heterogeneous nuclear ribonucleoprotein A1 OS=Homo sapiens OX=9606 GN=HNRNPA1 PE=1 SV=5	-0.105487	8.08825	-0.960726	0.342052	0.856139	-5.05249
sp|Q9BRJ7|TIRR_HUMAN	NUDT16L1	Tudor-interacting repair regulator protein OS=Homo sapiens OX=9606 GN=NUDT16L1 PE=1 SV=1	-0.109366	6.95908	-0.880662	0.384174	0.865905	-5.05256
sp|P45985|MP2K4_HUMAN	MAP2K4	Dual specificity mitogen-activated protein kinase kinase 4 OS=Homo sapiens OX=9606 GN=MAP2K4 PE=1 SV=1	-0.104557	7.31375	-0.959994	0.342416	0.856139	-5.05306
sp|O15484|CAN5_HUMAN	CAPN5	Calpain-5 OS=Homo sapiens OX=9606 GN=CAPN5 PE=1 SV=2	-0.120842	7.68746	-0.95891	0.342955	0.856139	-5.0539
sp|Q3ZCQ8|TIM50_HUMAN	TIMM50	Mitochondrial import inner membrane translocase subunit TIM50 OS=Homo sapiens OX=9606 GN=TIMM50 PE=1 SV=2	-0.129045	7.36792	-0.958643	0.343088	0.856139	-5.05411
sp|P34949|MPI_HUMAN	MPI	Mannose-6-phosphate isomerase OS=Homo sapiens OX=9606 GN=MPI PE=1 SV=2	0.118772	6.91672	0.95788	0.343469	0.856139	-5.0547
sp|Q86SX6|GLRX5_HUMAN	GLRX5	Glutaredoxin-related protein 5, mitochondrial OS=Homo sapiens OX=9606 GN=GLRX5 PE=1 SV=2	0.114378	6.48271	0.89721	0.375245	0.859967	-5.05481
tr|A0A499FIX8|A0A499FIX8_HUMAN	ESYT2	Extended synaptotagmin 2 OS=Homo sapiens OX=9606 GN=ESYT2 PE=1 SV=1	-0.298458	6.64241	-0.731141	0.470544	0.896508	-5.05487
sp|P00568|KAD1_HUMAN	AK1	Adenylate kinase isoenzyme 1 OS=Homo sapiens OX=9606 GN=AK1 PE=1 SV=3	-0.114807	8.98048	-0.957266	0.343775	0.856139	-5.05518
sp|Q13797|ITA9_HUMAN	ITGA9	Integrin alpha-9 OS=Homo sapiens OX=9606 GN=ITGA9 PE=1 SV=2	-0.147665	6.41143	-0.639747	0.528139	0.915766	-5.05552
sp|Q6P4F2|FDX2_HUMAN	FDX2	Ferredoxin-2, mitochondrial OS=Homo sapiens OX=9606 GN=FDX2 PE=1 SV=2	0.207467	6.82916	0.763968	0.450838	0.891637	-5.05565
sp|P20701|ITAL_HUMAN	ITGAL	Integrin alpha-L OS=Homo sapiens OX=9606 GN=ITGAL PE=1 SV=3	-0.172696	7.49877	-0.956388	0.344213	0.856139	-5.05586
sp|P15927|RFA2_HUMAN	RPA2	Replication protein A 32 kDa subunit OS=Homo sapiens OX=9606 GN=RPA2 PE=1 SV=1	0.149851	7.09529	0.944306	0.350404	0.85897	-5.05637
sp|P27348|1433T_HUMAN	YWHAQ	14-3-3 protein theta OS=Homo sapiens OX=9606 GN=YWHAQ PE=1 SV=1	0.101545	8.98581	0.95564	0.344586	0.856139	-5.05644
sp|O14908|GIPC1_HUMAN	GIPC1	PDZ domain-containing protein GIPC1 OS=Homo sapiens OX=9606 GN=GIPC1 PE=1 SV=2	-0.104849	6.93138	-0.955589	0.344612	0.856139	-5.05648
sp|Q68D91|MBLC2_HUMAN	MBLAC2	Acyl-coenzyme A thioesterase MBLAC2 OS=Homo sapiens OX=9606 GN=MBLAC2 PE=1 SV=3	0.100473	8.31035	0.955214	0.344799	0.856139	-5.05677
sp|Q9BXI3|5NT1A_HUMAN	NT5C1A	Cytosolic 5'-nucleotidase 1A OS=Homo sapiens OX=9606 GN=NT5C1A PE=1 SV=1	-0.121113	6.26972	-0.674347	0.505808	0.902627	-5.05761
sp|Q7Z6J4|FGD2_HUMAN	FGD2	FYVE, RhoGEF and PH domain-containing protein 2 OS=Homo sapiens OX=9606 GN=FGD2 PE=1 SV=1	-0.16262	6.0116	-0.686718	0.4981	0.900948	-5.05807
sp|Q53HC9|EIPR1_HUMAN	EIPR1	EARP and GARP complex-interacting protein 1 OS=Homo sapiens OX=9606 GN=EIPR1 PE=1 SV=2	0.0978634	7.84837	0.953117	0.345848	0.857213	-5.05839
sp|Q96DB5|RMD1_HUMAN	RMDN1	Regulator of microtubule dynamics protein 1 OS=Homo sapiens OX=9606 GN=RMDN1 PE=1 SV=1	0.140272	7.86635	0.903897	0.371588	0.859967	-5.05864
sp|Q9NTU7|CBLN4_HUMAN	CBLN4	Cerebellin-4 OS=Homo sapiens OX=9606 GN=CBLN4 PE=1 SV=1	0.122576	5.62368	0.497303	0.623892	0.931005	-5.05927
sp|Q9BSW7|SYT17_HUMAN	SYT17	Synaptotagmin-17 OS=Homo sapiens OX=9606 GN=SYT17 PE=1 SV=1	0.158182	5.98659	0.814549	0.421156	0.879437	-5.05969
sp|P52907|CAZA1_HUMAN	CAPZA1	F-actin-capping protein subunit alpha-1 OS=Homo sapiens OX=9606 GN=CAPZA1 PE=1 SV=3	0.12653	6.81952	0.951074	0.346873	0.85766	-5.05997
sp|Q9H9T3|ELP3_HUMAN	ELP3	Elongator complex protein 3 OS=Homo sapiens OX=9606 GN=ELP3 PE=1 SV=2	0.137617	6.7318	0.901946	0.372611	0.859967	-5.06004
sp|Q9P2U7|VGLU1_HUMAN	SLC17A7	Vesicular glutamate transporter 1 OS=Homo sapiens OX=9606 GN=SLC17A7 PE=2 SV=1	-0.167504	9.19964	-0.950196	0.347313	0.85766	-5.06064
sp|Q8WUG5|S22AH_HUMAN	SLC22A17	Solute carrier family 22 member 17 OS=Homo sapiens OX=9606 GN=SLC22A17 PE=1 SV=1	-0.13057	7.68153	-0.938575	0.353306	0.85897	-5.06072
sp|Q9NQZ5|STAR7_HUMAN	STARD7	StAR-related lipid transfer protein 7, mitochondrial OS=Homo sapiens OX=9606 GN=STARD7 PE=1 SV=2	0.101914	7.46147	0.950054	0.347385	0.85766	-5.06075
sp|P27816|MAP4_HUMAN	MAP4	Microtubule-associated protein 4 OS=Homo sapiens OX=9606 GN=MAP4 PE=1 SV=3	-0.100739	7.33617	-0.949838	0.347493	0.85766	-5.06092
sp|Q92686|NEUG_HUMAN	NRGN	Neurogranin OS=Homo sapiens OX=9606 GN=NRGN PE=1 SV=1	-0.208069	9.21943	-0.94981	0.347507	0.85766	-5.06094
sp|Q9H074|PAIP1_HUMAN	PAIP1	Polyadenylate-binding protein-interacting protein 1 OS=Homo sapiens OX=9606 GN=PAIP1 PE=1 SV=1	0.155371	7.97109	0.888523	0.379838	0.863018	-5.06094
sp|Q32NB8|PGPS1_HUMAN	PGS1	CDP-diacylglycerol--glycerol-3-phosphate 3-phosphatidyltransferase, mitochondrial OS=Homo sapiens OX=9606 GN=PGS1 PE=2 SV=1	-0.161124	6.87287	-0.845314	0.403665	0.8712	-5.06102
sp|Q86V21|AACS_HUMAN	AACS	Acetoacetyl-CoA synthetase OS=Homo sapiens OX=9606 GN=AACS PE=1 SV=1	-0.14933	6.91389	-0.884925	0.381751	0.865443	-5.06131
sp|Q8N4V1|EMC5_HUMAN	MMGT1	ER membrane protein complex subunit 5 OS=Homo sapiens OX=9606 GN=MMGT1 PE=1 SV=1	0.165028	8.33897	0.937681	0.353759	0.85897	-5.0614
sp|P35244|RFA3_HUMAN	RPA3	Replication protein A 14 kDa subunit OS=Homo sapiens OX=9606 GN=RPA3 PE=1 SV=1	0.122045	6.70705	0.729257	0.471678	0.897034	-5.06155
sp|Q8TDX7|NEK7_HUMAN	NEK7	Serine/threonine-protein kinase Nek7 OS=Homo sapiens OX=9606 GN=NEK7 PE=1 SV=1	-0.111215	6.69154	-0.947281	0.348779	0.85897	-5.06289
sp|Q6UXB8|PI16_HUMAN	PI16	Peptidase inhibitor 16 OS=Homo sapiens OX=9606 GN=PI16 PE=1 SV=1	-0.226422	6.82156	-0.935538	0.354849	0.85897	-5.06302
sp|P24821|TENA_HUMAN	TNC	Tenascin OS=Homo sapiens OX=9606 GN=TNC PE=1 SV=3	0.145961	6.99541	0.94644	0.349203	0.85897	-5.06353
sp|Q9UFN0|NPS3A_HUMAN	NIPSNAP3A	Protein NipSnap homolog 3A OS=Homo sapiens OX=9606 GN=NIPSNAP3A PE=1 SV=2	-0.143645	7.08921	-0.845382	0.40347	0.8712	-5.06354
sp|P31948|STIP1_HUMAN	STIP1	Stress-induced-phosphoprotein 1 OS=Homo sapiens OX=9606 GN=STIP1 PE=1 SV=1	-0.117229	7.82754	-0.946051	0.349399	0.85897	-5.06383
sp|Q96S59|RANB9_HUMAN	RANBP9	Ran-binding protein 9 OS=Homo sapiens OX=9606 GN=RANBP9 PE=1 SV=1	0.116721	6.85181	0.945851	0.3495	0.85897	-5.06398
sp|Q8IWV7|UBR1_HUMAN	UBR1	E3 ubiquitin-protein ligase UBR1 OS=Homo sapiens OX=9606 GN=UBR1 PE=1 SV=1	0.133583	6.55596	0.823203	0.416116	0.87884	-5.06458
sp|Q9NTK5|OLA1_HUMAN	OLA1	Obg-like ATPase 1 OS=Homo sapiens OX=9606 GN=OLA1 PE=1 SV=2	0.078467	7.97709	0.944867	0.349996	0.85897	-5.06474
sp|Q92747|ARC1A_HUMAN	ARPC1A	Actin-related protein 2/3 complex subunit 1A OS=Homo sapiens OX=9606 GN=ARPC1A PE=1 SV=2	-0.076716	7.70935	-0.943835	0.350518	0.85897	-5.06553
sp|O60733|PLPL9_HUMAN	PLA2G6	85/88 kDa calcium-independent phospholipase A2 OS=Homo sapiens OX=9606 GN=PLA2G6 PE=1 SV=2	-0.129928	7.35323	-0.931802	0.356755	0.85897	-5.06584
sp|Q14315|FLNC_HUMAN	FLNC	Filamin-C OS=Homo sapiens OX=9606 GN=FLNC PE=1 SV=3	-0.0995013	6.70916	-0.943108	0.350885	0.85897	-5.06608
sp|Q6P1N0|C2D1A_HUMAN	CC2D1A	Coiled-coil and C2 domain-containing protein 1A OS=Homo sapiens OX=9606 GN=CC2D1A PE=1 SV=1	0.0929376	7.22109	0.931195	0.357065	0.85897	-5.06629
sp|P00488|F13A_HUMAN	F13A1	Coagulation factor XIII A chain OS=Homo sapiens OX=9606 GN=F13A1 PE=1 SV=5	-0.161868	7.27759	-0.942745	0.351069	0.85897	-5.06636
sp|Q96AG4|LRC59_HUMAN	LRRC59	Leucine-rich repeat-containing protein 59 OS=Homo sapiens OX=9606 GN=LRRC59 PE=1 SV=1	-0.141507	6.4254	-0.817913	0.419089	0.879437	-5.06794
sp|P35221|CTNA1_HUMAN	CTNNA1	Catenin alpha-1 OS=Homo sapiens OX=9606 GN=CTNNA1 PE=1 SV=1	-0.107487	6.93398	-0.939685	0.352619	0.85897	-5.0687
sp|Q8IYJ1|CPNE9_HUMAN	CPNE9	Copine-9 OS=Homo sapiens OX=9606 GN=CPNE9 PE=1 SV=3	0.106353	6.68716	0.628554	0.535108	0.916891	-5.06925
sp|P14625|ENPL_HUMAN	HSP90B1	Endoplasmin OS=Homo sapiens OX=9606 GN=HSP90B1 PE=1 SV=1	0.127107	8.25222	0.938857	0.353039	0.85897	-5.06933
sp|Q16706|MA2A1_HUMAN	MAN2A1	Alpha-mannosidase 2 OS=Homo sapiens OX=9606 GN=MAN2A1 PE=1 SV=2	0.158689	6.43192	0.717253	0.47894	0.898247	-5.06989
sp|O75390|CISY_HUMAN	CS	Citrate synthase, mitochondrial OS=Homo sapiens OX=9606 GN=CS PE=1 SV=2	0.120351	8.19683	0.938109	0.353419	0.85897	-5.0699
sp|Q14847|LASP1_HUMAN	LASP1	LIM and SH3 domain protein 1 OS=Homo sapiens OX=9606 GN=LASP1 PE=1 SV=2	-0.103328	7.39653	-0.937746	0.353603	0.85897	-5.07017
sp|Q9Y2J8|PADI2_HUMAN	PADI2	Protein-arginine deiminase type-2 OS=Homo sapiens OX=9606 GN=PADI2 PE=1 SV=2	-0.137085	8.93224	-0.937684	0.353635	0.85897	-5.07022
sp|Q14671|PUM1_HUMAN	PUM1	Pumilio homolog 1 OS=Homo sapiens OX=9606 GN=PUM1 PE=1 SV=3	0.1324	7.10021	0.937164	0.353899	0.85897	-5.07062
sp|Q8WUD6|CHPT1_HUMAN	CHPT1	Cholinephosphotransferase 1 OS=Homo sapiens OX=9606 GN=CHPT1 PE=1 SV=1	-0.202252	8.63666	-0.82842	0.413034	0.875939	-5.07075
sp|Q07960|RHG01_HUMAN	ARHGAP1	Rho GTPase-activating protein 1 OS=Homo sapiens OX=9606 GN=ARHGAP1 PE=1 SV=1	-0.0950763	8.34982	-0.936656	0.354157	0.85897	-5.071
sp|P42126|ECI1_HUMAN	ECI1	Enoyl-CoA delta isomerase 1, mitochondrial OS=Homo sapiens OX=9606 GN=ECI1 PE=1 SV=1	0.172667	6.51018	0.870615	0.38942	0.869678	-5.07125
sp|Q4G0N4|NAKD2_HUMAN	NADK2	NAD kinase 2, mitochondrial OS=Homo sapiens OX=9606 GN=NADK2 PE=1 SV=2	0.102684	7.06517	0.936024	0.354479	0.85897	-5.07148
sp|P19320|VCAM1_HUMAN	VCAM1	Vascular cell adhesion protein 1 OS=Homo sapiens OX=9606 GN=VCAM1 PE=1 SV=1	-0.156504	7.0052	-0.564386	0.577314	0.918772	-5.07166
sp|Q9H1P3|OSBL2_HUMAN	OSBPL2	Oxysterol-binding protein-related protein 2 OS=Homo sapiens OX=9606 GN=OSBPL2 PE=1 SV=1	-0.13823	6.22374	-0.935782	0.354602	0.85897	-5.07167
sp|Q9Y2D4|EXC6B_HUMAN	EXOC6B	Exocyst complex component 6B OS=Homo sapiens OX=9606 GN=EXOC6B PE=1 SV=3	-0.0836884	6.9604	-0.935084	0.354957	0.85897	-5.0722
sp|O43633|CHM2A_HUMAN	CHMP2A	Charged multivesicular body protein 2a OS=Homo sapiens OX=9606 GN=CHMP2A PE=1 SV=1	-0.128216	7.95474	-0.935071	0.354964	0.85897	-5.07221
sp|P32189|GLPK_HUMAN	GK	Glycerol kinase OS=Homo sapiens OX=9606 GN=GK PE=1 SV=3	-0.120851	7.24778	-0.932924	0.356059	0.85897	-5.07383
sp|O43237|DC1L2_HUMAN	DYNC1LI2	Cytoplasmic dynein 1 light intermediate chain 2 OS=Homo sapiens OX=9606 GN=DYNC1LI2 PE=1 SV=1	-0.0888975	7.58336	-0.932583	0.356233	0.85897	-5.07409
sp|Q08345|DDR1_HUMAN	DDR1	Epithelial discoidin domain-containing receptor 1 OS=Homo sapiens OX=9606 GN=DDR1 PE=1 SV=1	-0.0975964	6.55446	-0.932378	0.356338	0.85897	-5.07425
sp|Q14558|KPRA_HUMAN	PRPSAP1	Phosphoribosyl pyrophosphate synthase-associated protein 1 OS=Homo sapiens OX=9606 GN=PRPSAP1 PE=1 SV=2	0.0883491	7.36683	0.93213	0.356464	0.85897	-5.07443
tr|A0A804CJ50|A0A804CJ50_HUMAN	CAMK2G	Calcium/calmodulin dependent protein kinase II gamma OS=Homo sapiens OX=9606 GN=CAMK2G PE=1 SV=1	0.10074	5.33986	0.420138	0.678637	0.944057	-5.07455
sp|Q9Y3Q8|T22D4_HUMAN	SPACDR	Sperm acrosome developmental regulator OS=Homo sapiens OX=9606 GN=SPACDR PE=1 SV=2	0.113853	7.64361	0.931004	0.35704	0.85897	-5.07529
sp|Q96AC1|FERM2_HUMAN	FERMT2	Fermitin family homolog 2 OS=Homo sapiens OX=9606 GN=FERMT2 PE=1 SV=1	-0.0875248	7.53689	-0.931002	0.357041	0.85897	-5.07529
sp|Q86XD5|F131B_HUMAN	FAM131B	Protein FAM131B OS=Homo sapiens OX=9606 GN=FAM131B PE=1 SV=3	-0.143733	6.93171	-0.907256	0.369563	0.859967	-5.07543
sp|P51153|RAB13_HUMAN	RAB13	Ras-related protein Rab-13 OS=Homo sapiens OX=9606 GN=RAB13 PE=1 SV=1	-0.112231	8.03266	-0.878968	0.384792	0.865905	-5.07633
sp|Q6EMK4|VASN_HUMAN	VASN	Vasorin OS=Homo sapiens OX=9606 GN=VASN PE=1 SV=1	0.140005	6.67064	0.879851	0.384319	0.865905	-5.07674
sp|Q8NE86|MCU_HUMAN	MCU	Calcium uniporter protein, mitochondrial OS=Homo sapiens OX=9606 GN=MCU PE=1 SV=1	-0.124506	7.16516	-0.928936	0.358099	0.859043	-5.07685
sp|P35241|RADI_HUMAN	RDX	Radixin OS=Homo sapiens OX=9606 GN=RDX PE=1 SV=1	-0.105628	8.30732	-0.928724	0.358207	0.859043	-5.07701
sp|P02545|LMNA_HUMAN	LMNA	Prelamin-A/C OS=Homo sapiens OX=9606 GN=LMNA PE=1 SV=1	-0.141045	6.88078	-0.915316	0.365241	0.859967	-5.07814
sp|Q96RF0|SNX18_HUMAN	SNX18	Sorting nexin-18 OS=Homo sapiens OX=9606 GN=SNX18 PE=1 SV=2	-0.102626	6.55523	-0.927105	0.359038	0.859043	-5.07823
sp|P49368|TCPG_HUMAN	CCT3	T-complex protein 1 subunit gamma OS=Homo sapiens OX=9606 GN=CCT3 PE=1 SV=4	0.0636524	8.04798	0.926452	0.359373	0.859043	-5.07872
sp|Q96KG9|SCYL1_HUMAN	SCYL1	N-terminal kinase-like protein OS=Homo sapiens OX=9606 GN=SCYL1 PE=1 SV=1	0.0747775	7.60381	0.926443	0.359377	0.859043	-5.07872
sp|P08571|CD14_HUMAN	CD14	Monocyte differentiation antigen CD14 OS=Homo sapiens OX=9606 GN=CD14 PE=1 SV=2	-0.201781	7.7409	-0.926344	0.359428	0.859043	-5.0788
sp|P80404|GABT_HUMAN	ABAT	4-aminobutyrate aminotransferase, mitochondrial OS=Homo sapiens OX=9606 GN=ABAT PE=1 SV=3	0.140631	8.17372	0.92596	0.359625	0.859043	-5.07909
sp|Q9NRY5|F1142_HUMAN	FAM114A2	Protein FAM114A2 OS=Homo sapiens OX=9606 GN=FAM114A2 PE=1 SV=4	-0.136398	6.64539	-0.874967	0.386938	0.868313	-5.07912
sp|Q04609|FOLH1_HUMAN	FOLH1	Glutamate carboxypeptidase 2 OS=Homo sapiens OX=9606 GN=FOLH1 PE=1 SV=1	0.112735	7.43082	0.925765	0.359725	0.859043	-5.07923
sp|P05060|SCG1_HUMAN	CHGB	Secretogranin-1 OS=Homo sapiens OX=9606 GN=CHGB PE=1 SV=2	-0.16253	7.05921	-0.900695	0.373001	0.859967	-5.07927
sp|Q9UKS6|PACN3_HUMAN	PACSIN3	Protein kinase C and casein kinase substrate in neurons protein 3 OS=Homo sapiens OX=9606 GN=PACSIN3 PE=1 SV=2	-0.0965351	7.83922	-0.925695	0.359762	0.859043	-5.07929
sp|Q15436|SC23A_HUMAN	SEC23A	Protein transport protein Sec23A OS=Homo sapiens OX=9606 GN=SEC23A PE=1 SV=2	-0.0788493	7.4686	-0.925086	0.360075	0.859043	-5.07974
sp|Q9UN70|PCDGK_HUMAN	PCDHGC3	Protocadherin gamma-C3 OS=Homo sapiens OX=9606 GN=PCDHGC3 PE=1 SV=1	-0.117457	7.10984	-0.757004	0.454572	0.892301	-5.07977
sp|P24298|ALAT1_HUMAN	GPT	Alanine aminotransferase 1 OS=Homo sapiens OX=9606 GN=GPT PE=1 SV=3	0.146429	6.93028	0.641528	0.526573	0.914515	-5.08002
sp|P02763|A1AG1_HUMAN	ORM1	Alpha-1-acid glycoprotein 1 OS=Homo sapiens OX=9606 GN=ORM1 PE=1 SV=2	0.165594	7.31936	0.911957	0.366986	0.859967	-5.08062
sp|Q9UDT6|CLIP2_HUMAN	CLIP2	CAP-Gly domain-containing linker protein 2 OS=Homo sapiens OX=9606 GN=CLIP2 PE=1 SV=1	0.0765339	6.66129	0.923645	0.360816	0.859907	-5.08083
sp|P19075|TSN8_HUMAN	TSPAN8	Tetraspanin-8 OS=Homo sapiens OX=9606 GN=TSPAN8 PE=1 SV=1	0.188959	11.8056	0.911585	0.36718	0.859967	-5.08089
sp|Q96AX1|VP33A_HUMAN	VPS33A	Vacuolar protein sorting-associated protein 33A OS=Homo sapiens OX=9606 GN=VPS33A PE=1 SV=1	0.0995417	6.48369	0.922542	0.361384	0.859967	-5.08165
sp|Q5VWJ9|SNX30_HUMAN	SNX30	Sorting nexin-30 OS=Homo sapiens OX=9606 GN=SNX30 PE=1 SV=1	-0.11291	7.15907	-0.922473	0.36142	0.859967	-5.0817
tr|A0A0G2JQM1|A0A0G2JQM1_HUMAN	AP2A2	AP-2 complex subunit alpha-2 (Fragment) OS=Homo sapiens OX=9606 GN=AP2A2 PE=1 SV=1	0.185914	8.51639	0.921806	0.361764	0.859967	-5.0822
sp|Q9H4A3|WNK1_HUMAN	WNK1	Serine/threonine-protein kinase WNK1 OS=Homo sapiens OX=9606 GN=WNK1 PE=1 SV=2	-0.0572501	7.04505	-0.921626	0.361857	0.859967	-5.08234
sp|Q9UPW8|UN13A_HUMAN	UNC13A	Protein unc-13 homolog A OS=Homo sapiens OX=9606 GN=UNC13A PE=2 SV=4	-0.113704	7.12493	-0.909402	0.368318	0.859967	-5.0825
sp|Q8TDQ7|GNPI2_HUMAN	GNPDA2	Glucosamine-6-phosphate isomerase 2 OS=Homo sapiens OX=9606 GN=GNPDA2 PE=1 SV=1	0.148568	7.11225	0.635842	0.530217	0.916087	-5.08268
sp|P26572|MGAT1_HUMAN	MGAT1	Alpha-1,3-mannosyl-glycoprotein 2-beta-N-acetylglucosaminyltransferase OS=Homo sapiens OX=9606 GN=MGAT1 PE=1 SV=2	-0.102543	7.08786	-0.593747	0.557609	0.918772	-5.08325
sp|O00629|IMA3_HUMAN	KPNA4	Importin subunit alpha-3 OS=Homo sapiens OX=9606 GN=KPNA4 PE=1 SV=1	0.111363	7.05653	0.908169	0.368961	0.859967	-5.0834
sp|Q16775|GLO2_HUMAN	HAGH	Hydroxyacylglutathione hydrolase, mitochondrial OS=Homo sapiens OX=9606 GN=HAGH PE=1 SV=2	-0.122081	7.65945	-0.920112	0.362638	0.859967	-5.08347
sp|Q4G0F5|VP26B_HUMAN	VPS26B	Vacuolar protein sorting-associated protein 26B OS=Homo sapiens OX=9606 GN=VPS26B PE=1 SV=2	-0.0966343	8.01955	-0.920032	0.36268	0.859967	-5.08353
sp|Q9BYC5|FUT8_HUMAN	FUT8	Alpha-(1,6)-fucosyltransferase OS=Homo sapiens OX=9606 GN=FUT8 PE=1 SV=2	-0.117002	6.98654	-0.894729	0.376145	0.859967	-5.08358
sp|Q6NUM9|RETST_HUMAN	RETSAT	All-trans-retinol 13,14-reductase OS=Homo sapiens OX=9606 GN=RETSAT PE=1 SV=2	-0.111766	6.95625	-0.90656	0.369802	0.859967	-5.08458
sp|P48735|IDHP_HUMAN	IDH2	Isocitrate dehydrogenase [NADP], mitochondrial OS=Homo sapiens OX=9606 GN=IDH2 PE=1 SV=2	0.139421	8.43259	0.917658	0.363907	0.859967	-5.0853
sp|O75061|AUXI_HUMAN	DNAJC6	Putative tyrosine-protein phosphatase auxilin OS=Homo sapiens OX=9606 GN=DNAJC6 PE=1 SV=3	0.0800588	8.12251	0.917051	0.364222	0.859967	-5.08575
sp|O60725|ICMT_HUMAN	ICMT	Protein-S-isoprenylcysteine O-methyltransferase OS=Homo sapiens OX=9606 GN=ICMT PE=1 SV=1	0.119592	6.12955	0.633877	0.53148	0.916087	-5.08582
sp|Q92522|H1X_HUMAN	H1-10	Histone H1.10 OS=Homo sapiens OX=9606 GN=H1-10 PE=1 SV=1	-0.152143	6.64551	-0.904787	0.37073	0.859967	-5.08588
sp|Q5JRA6|TGO1_HUMAN	MIA3	Transport and Golgi organization protein 1 homolog OS=Homo sapiens OX=9606 GN=MIA3 PE=1 SV=1	-0.111358	6.62963	-0.916625	0.364442	0.859967	-5.08607
sp|Q5SGD2|PPM1L_HUMAN	PPM1L	Protein phosphatase 1L OS=Homo sapiens OX=9606 GN=PPM1L PE=1 SV=1	-0.0943366	7.31712	-0.904008	0.371138	0.859967	-5.08645
sp|P33176|KINH_HUMAN	KIF5B	Kinesin-1 heavy chain OS=Homo sapiens OX=9606 GN=KIF5B PE=1 SV=1	-0.0555276	7.04841	-0.916049	0.364741	0.859967	-5.0865
sp|Q53HC0|CCD92_HUMAN	CCDC92	Coiled-coil domain-containing protein 92 OS=Homo sapiens OX=9606 GN=CCDC92 PE=1 SV=2	0.128082	6.79474	0.903088	0.37162	0.859967	-5.08712
sp|Q9Y6A4|CFA20_HUMAN	CFAP20	Cilia- and flagella-associated protein 20 OS=Homo sapiens OX=9606 GN=CFAP20 PE=1 SV=1	0.0918401	7.1619	0.560007	0.580443	0.918772	-5.08725
sp|Q15067|ACOX1_HUMAN	ACOX1	Peroxisomal acyl-coenzyme A oxidase 1 OS=Homo sapiens OX=9606 GN=ACOX1 PE=1 SV=3	0.111742	6.59156	0.699705	0.489488	0.900948	-5.08746
sp|Q96HU8|DIRA2_HUMAN	DIRAS2	GTP-binding protein Di-Ras2 OS=Homo sapiens OX=9606 GN=DIRAS2 PE=1 SV=1	0.111794	7.83885	0.9144	0.365597	0.859967	-5.08772
sp|Q12905|ILF2_HUMAN	ILF2	Interleukin enhancer-binding factor 2 OS=Homo sapiens OX=9606 GN=ILF2 PE=1 SV=2	0.149648	6.73628	0.913502	0.366063	0.859967	-5.08839
sp|O15031|PLXB2_HUMAN	PLXNB2	Plexin-B2 OS=Homo sapiens OX=9606 GN=PLXNB2 PE=1 SV=3	-0.095122	7.60944	-0.913234	0.366203	0.859967	-5.08859
sp|O43572|AKA10_HUMAN	AKAP10	A-kinase anchor protein 10, mitochondrial OS=Homo sapiens OX=9606 GN=AKAP10 PE=1 SV=2	-0.156587	6.43666	-0.747047	0.460476	0.894821	-5.0886
sp|P04440|DPB1_HUMAN	HLA-DPB1	HLA class II histocompatibility antigen, DP beta 1 chain OS=Homo sapiens OX=9606 GN=HLA-DPB1 PE=1 SV=1	-0.148466	7.99179	-0.534992	0.597368	0.924102	-5.08903
sp|P51793|CLCN4_HUMAN	CLCN4	H(+)/Cl(-) exchange transporter 4 OS=Homo sapiens OX=9606 GN=CLCN4 PE=1 SV=2	-0.141463	8.10488	-0.899614	0.373445	0.859967	-5.08966
sp|Q9GZT6|CC90B_HUMAN	CCDC90B	Coiled-coil domain-containing protein 90B, mitochondrial OS=Homo sapiens OX=9606 GN=CCDC90B PE=1 SV=2	-0.105999	7.41749	-0.911217	0.367252	0.859967	-5.09008
sp|P22897|MRC1_HUMAN	MRC1	Macrophage mannose receptor 1 OS=Homo sapiens OX=9606 GN=MRC1 PE=1 SV=1	-0.197677	7.39594	-0.910809	0.367464	0.859967	-5.09039
sp|Q96JJ7|TMX3_HUMAN	TMX3	Protein disulfide-isomerase TMX3 OS=Homo sapiens OX=9606 GN=TMX3 PE=1 SV=2	-0.105195	7.70483	-0.910376	0.36769	0.859967	-5.09071
sp|Q06210|GFPT1_HUMAN	GFPT1	Glutamine--fructose-6-phosphate aminotransferase [isomerizing] 1 OS=Homo sapiens OX=9606 GN=GFPT1 PE=1 SV=3	0.0916534	6.27029	0.910188	0.367788	0.859967	-5.09085
sp|Q9UHD1|CHRD1_HUMAN	CHORDC1	Cysteine and histidine-rich domain-containing protein 1 OS=Homo sapiens OX=9606 GN=CHORDC1 PE=1 SV=2	-0.131247	6.70669	-0.910132	0.367818	0.859967	-5.09089
sp|Q86VX2|COMD7_HUMAN	COMMD7	COMM domain-containing protein 7 OS=Homo sapiens OX=9606 GN=COMMD7 PE=1 SV=2	0.102364	6.82669	0.869558	0.38972	0.869678	-5.09299
sp|O14662|STX16_HUMAN	STX16	Syntaxin-16 OS=Homo sapiens OX=9606 GN=STX16 PE=1 SV=3	-0.101837	6.18062	-0.545279	0.590379	0.920784	-5.0931
sp|O14734|ACOT8_HUMAN	ACOT8	Acyl-coenzyme A thioesterase 8 OS=Homo sapiens OX=9606 GN=ACOT8 PE=1 SV=1	0.0970497	7.36678	0.906801	0.369557	0.859967	-5.09335
sp|P02679|FIBG_HUMAN	FGG	Fibrinogen gamma chain OS=Homo sapiens OX=9606 GN=FGG PE=1 SV=3	-0.179245	7.91441	-0.906362	0.369786	0.859967	-5.09367
sp|Q99622|C10_HUMAN	C12orf57	Protein C10 OS=Homo sapiens OX=9606 GN=C12orf57 PE=1 SV=1	-0.165378	6.88754	-0.791593	0.433918	0.881829	-5.09399
sp|O43464|HTRA2_HUMAN	HTRA2	Serine protease HTRA2, mitochondrial OS=Homo sapiens OX=9606 GN=HTRA2 PE=1 SV=2	-0.0947373	6.78395	-0.482387	0.633715	0.932506	-5.09417
sp|Q9Y5P6|GMPPB_HUMAN	GMPPB	Mannose-1-phosphate guanyltransferase beta OS=Homo sapiens OX=9606 GN=GMPPB PE=1 SV=2	-0.0823933	7.70691	-0.905273	0.370356	0.859967	-5.09447
sp|Q86SK9|SCD5_HUMAN	SCD5	Stearoyl-CoA desaturase 5 OS=Homo sapiens OX=9606 GN=SCD5 PE=1 SV=2	-0.20731	6.94964	-0.904811	0.370598	0.859967	-5.09481
sp|Q92841|DDX17_HUMAN	DDX17	Probable ATP-dependent RNA helicase DDX17 OS=Homo sapiens OX=9606 GN=DDX17 PE=1 SV=2	0.0709936	7.50242	0.904768	0.370621	0.859967	-5.09484
sp|O60869|EDF1_HUMAN	EDF1	Endothelial differentiation-related factor 1 OS=Homo sapiens OX=9606 GN=EDF1 PE=1 SV=1	-0.129269	6.93644	-0.904145	0.370947	0.859967	-5.0953
sp|Q9Y5X1|SNX9_HUMAN	SNX9	Sorting nexin-9 OS=Homo sapiens OX=9606 GN=SNX9 PE=1 SV=1	-0.091217	6.89407	-0.903868	0.371093	0.859967	-5.0955
sp|Q8N6H7|ARFG2_HUMAN	ARFGAP2	ADP-ribosylation factor GTPase-activating protein 2 OS=Homo sapiens OX=9606 GN=ARFGAP2 PE=1 SV=1	-0.111524	7.19799	-0.877854	0.385129	0.865905	-5.09562
sp|Q9UJZ1|STML2_HUMAN	STOML2	Stomatin-like protein 2, mitochondrial OS=Homo sapiens OX=9606 GN=STOML2 PE=1 SV=1	-0.126953	8.78737	-0.903437	0.371318	0.859967	-5.09582
sp|O00299|CLIC1_HUMAN	CLIC1	Chloride intracellular channel protein 1 OS=Homo sapiens OX=9606 GN=CLIC1 PE=1 SV=4	-0.160278	7.63761	-0.903308	0.371386	0.859967	-5.09591
sp|Q8TEA8|DTD1_HUMAN	DTD1	D-aminoacyl-tRNA deacylase 1 OS=Homo sapiens OX=9606 GN=DTD1 PE=1 SV=2	-0.266229	6.04162	-0.802744	0.427379	0.879926	-5.09593
sp|P54687|BCAT1_HUMAN	BCAT1	Branched-chain-amino-acid aminotransferase, cytosolic OS=Homo sapiens OX=9606 GN=BCAT1 PE=1 SV=3	0.0647444	6.01135	0.175994	0.862062	0.982649	-5.09599
sp|Q08499|PDE4D_HUMAN	PDE4D	cAMP-specific 3',5'-cyclic phosphodiesterase 4D OS=Homo sapiens OX=9606 GN=PDE4D PE=1 SV=2	-0.0322447	6.77517	-0.164509	0.870827	0.983369	-5.09639
sp|P18124|RL7_HUMAN	RPL7	60S ribosomal protein L7 OS=Homo sapiens OX=9606 GN=RPL7 PE=1 SV=1	0.066477	8.04617	0.901901	0.372125	0.859967	-5.09695
sp|Q9BZZ5|API5_HUMAN	API5	Apoptosis inhibitor 5 OS=Homo sapiens OX=9606 GN=API5 PE=1 SV=3	0.0905769	6.93308	0.90155	0.372309	0.859967	-5.0972
sp|O15270|SPTC2_HUMAN	SPTLC2	Serine palmitoyltransferase 2 OS=Homo sapiens OX=9606 GN=SPTLC2 PE=1 SV=1	-0.128987	6.58146	-0.803901	0.426578	0.879437	-5.09748
sp|Q8NE71|ABCF1_HUMAN	ABCF1	ATP-binding cassette sub-family F member 1 OS=Homo sapiens OX=9606 GN=ABCF1 PE=1 SV=2	0.0879847	7.13225	0.901071	0.372561	0.859967	-5.09755
sp|Q6UWE0|LRSM1_HUMAN	LRSAM1	E3 ubiquitin-protein ligase LRSAM1 OS=Homo sapiens OX=9606 GN=LRSAM1 PE=1 SV=1	0.0943361	6.76513	0.900141	0.37305	0.859967	-5.09824
sp|P30101|PDIA3_HUMAN	PDIA3	Protein disulfide-isomerase A3 OS=Homo sapiens OX=9606 GN=PDIA3 PE=1 SV=4	0.165273	8.45301	0.89938	0.37345	0.859967	-5.09879
sp|Q9NUP9|LIN7C_HUMAN	LIN7C	Protein lin-7 homolog C OS=Homo sapiens OX=9606 GN=LIN7C PE=1 SV=1	0.122294	8.98881	0.89836	0.373987	0.859967	-5.09954
sp|P09497|CLCB_HUMAN	CLTB	Clathrin light chain B OS=Homo sapiens OX=9606 GN=CLTB PE=1 SV=1	-0.133446	10.3483	-0.897966	0.374195	0.859967	-5.09982
sp|Q04637|IF4G1_HUMAN	EIF4G1	Eukaryotic translation initiation factor 4 gamma 1 OS=Homo sapiens OX=9606 GN=EIF4G1 PE=1 SV=4	-0.0555349	6.84568	-0.897169	0.374615	0.859967	-5.10041
sp|Q13423|NNTM_HUMAN	NNT	NAD(P) transhydrogenase, mitochondrial OS=Homo sapiens OX=9606 GN=NNT PE=1 SV=3	-0.136746	9.18918	-0.897107	0.374648	0.859967	-5.10045
sp|Q99755|PI51A_HUMAN	PIP5K1A	Phosphatidylinositol 4-phosphate 5-kinase type-1 alpha OS=Homo sapiens OX=9606 GN=PIP5K1A PE=1 SV=1	0.125066	7.27275	0.858579	0.395679	0.870919	-5.1006
sp|Q14974|IMB1_HUMAN	KPNB1	Importin subunit beta-1 OS=Homo sapiens OX=9606 GN=KPNB1 PE=1 SV=2	-0.0727726	7.90153	-0.896826	0.374797	0.859967	-5.10066
sp|O60825|F262_HUMAN	PFKFB2	6-phosphofructo-2-kinase/fructose-2,6-bisphosphatase 2 OS=Homo sapiens OX=9606 GN=PFKFB2 PE=1 SV=2	0.0730935	7.85111	0.894536	0.376006	0.859967	-5.10232
sp|P23468|PTPRD_HUMAN	PTPRD	Receptor-type tyrosine-protein phosphatase delta OS=Homo sapiens OX=9606 GN=PTPRD PE=1 SV=2	-0.130527	6.29251	-0.868285	0.390283	0.869678	-5.10234
sp|P17931|LEG3_HUMAN	LGALS3	Galectin-3 OS=Homo sapiens OX=9606 GN=LGALS3 PE=1 SV=5	0.144468	8.07481	0.894377	0.37609	0.859967	-5.10244
sp|Q8TD22|SFXN5_HUMAN	SFXN5	Sideroflexin-5 OS=Homo sapiens OX=9606 GN=SFXN5 PE=1 SV=1	-0.17163	8.60653	-0.893937	0.376323	0.859967	-5.10276
sp|O94956|SO2B1_HUMAN	SLCO2B1	Solute carrier organic anion transporter family member 2B1 OS=Homo sapiens OX=9606 GN=SLCO2B1 PE=1 SV=2	-0.098118	7.26674	-0.893783	0.376404	0.859967	-5.10287
sp|P37108|SRP14_HUMAN	SRP14	Signal recognition particle 14 kDa protein OS=Homo sapiens OX=9606 GN=SRP14 PE=1 SV=2	-0.0973842	7.37663	-0.89372	0.376438	0.859967	-5.10292
sp|Q02543|RL18A_HUMAN	RPL18A	60S ribosomal protein L18a OS=Homo sapiens OX=9606 GN=RPL18A PE=1 SV=2	0.0819084	7.89849	0.893242	0.376691	0.859967	-5.10326
sp|Q5T848|GP158_HUMAN	GPR158	Probable G-protein coupled receptor 158 OS=Homo sapiens OX=9606 GN=GPR158 PE=1 SV=1	-0.132554	7.06928	-0.880565	0.383555	0.865905	-5.10338
sp|O15533|TPSN_HUMAN	TAPBP	Tapasin OS=Homo sapiens OX=9606 GN=TAPBP PE=1 SV=2	-0.125148	7.2581	-0.89287	0.376887	0.859967	-5.10353
sp|Q9Y496|KIF3A_HUMAN	KIF3A	Kinesin-like protein KIF3A OS=Homo sapiens OX=9606 GN=KIF3A PE=1 SV=4	0.113144	6.22298	0.892531	0.377067	0.859967	-5.10378
sp|Q658P3|STEA3_HUMAN	STEAP3	Metalloreductase STEAP3 OS=Homo sapiens OX=9606 GN=STEAP3 PE=1 SV=2	-0.13564	7.22956	-0.892451	0.37711	0.859967	-5.10384
sp|P18084|ITB5_HUMAN	ITGB5	Integrin beta-5 OS=Homo sapiens OX=9606 GN=ITGB5 PE=1 SV=1	-0.105838	7.45858	-0.892217	0.377234	0.859967	-5.10401
sp|Q13255|GRM1_HUMAN	GRM1	Metabotropic glutamate receptor 1 OS=Homo sapiens OX=9606 GN=GRM1 PE=1 SV=3	-0.0978169	6.99599	-0.523603	0.605151	0.928489	-5.10411
sp|P01023|A2MG_HUMAN	A2M	Alpha-2-macroglobulin OS=Homo sapiens OX=9606 GN=A2M PE=1 SV=3	-0.132718	7.95596	-0.891569	0.377577	0.860271	-5.10448
sp|P40818|UBP8_HUMAN	USP8	Ubiquitin carboxyl-terminal hydrolase 8 OS=Homo sapiens OX=9606 GN=USP8 PE=1 SV=1	0.126761	6.30666	0.792368	0.433325	0.881829	-5.10489
sp|Q9H4I9|EMRE_HUMAN	SMDT1	Essential MCU regulator, mitochondrial OS=Homo sapiens OX=9606 GN=SMDT1 PE=1 SV=1	-0.0937228	7.19646	-0.447228	0.658549	0.93534	-5.10573
sp|Q9BQ95|ECSIT_HUMAN	ECSIT	Evolutionarily conserved signaling intermediate in Toll pathway, mitochondrial OS=Homo sapiens OX=9606 GN=ECSIT PE=1 SV=1	0.00797058	6.73658	0.027882	0.978032	0.998357	-5.10613
sp|P32969|RL9_HUMAN	RPL9	60S ribosomal protein L9 OS=Homo sapiens OX=9606 GN=RPL9 PE=1 SV=1	-0.141837	8.43744	-0.888797	0.379048	0.862354	-5.10649
sp|P51114|FXR1_HUMAN	FXR1	RNA-binding protein FXR1 OS=Homo sapiens OX=9606 GN=FXR1 PE=1 SV=3	0.0851879	6.75769	0.888522	0.379195	0.862354	-5.10668
sp|P02792|FRIL_HUMAN	FTL	Ferritin light chain OS=Homo sapiens OX=9606 GN=FTL PE=1 SV=2	-0.163367	7.67803	-0.888259	0.379335	0.862354	-5.10687
sp|P61011|SRP54_HUMAN	SRP54	Signal recognition particle subunit SRP54 OS=Homo sapiens OX=9606 GN=SRP54 PE=1 SV=1	-0.133129	6.85927	-0.803848	0.426609	0.879437	-5.10696
sp|P0C7M8|CLC2L_HUMAN	CLEC2L	C-type lectin domain family 2 member L OS=Homo sapiens OX=9606 GN=CLEC2L PE=3 SV=1	0.142458	7.27578	0.861449	0.393992	0.870919	-5.10711
sp|Q9P2Y5|UVRAG_HUMAN	UVRAG	UV radiation resistance-associated gene protein OS=Homo sapiens OX=9606 GN=UVRAG PE=1 SV=1	-0.0724885	8.20987	-0.833564	0.409593	0.873923	-5.10732
sp|Q9BXJ0|C1QT5_HUMAN	C1QTNF5	Complement C1q tumor necrosis factor-related protein 5 OS=Homo sapiens OX=9606 GN=C1QTNF5 PE=1 SV=1	0.185471	7.28637	0.76238	0.45093	0.891637	-5.10775
sp|P27448|MARK3_HUMAN	MARK3	MAP/microtubule affinity-regulating kinase 3 OS=Homo sapiens OX=9606 GN=MARK3 PE=1 SV=5	-0.118231	5.45645	-0.468159	0.643881	0.932506	-5.10799
sp|A1Z1Q3|MACD2_HUMAN	MACROD2	ADP-ribose glycohydrolase MACROD2 OS=Homo sapiens OX=9606 GN=MACROD2 PE=1 SV=2	0.0950679	6.99029	0.694498	0.49237	0.900948	-5.108
sp|Q9BW60|ELOV1_HUMAN	ELOVL1	Elongation of very long chain fatty acids protein 1 OS=Homo sapiens OX=9606 GN=ELOVL1 PE=1 SV=1	0.136452	7.02912	0.751742	0.457367	0.892301	-5.1082
sp|Q16880|CGT_HUMAN	UGT8	2-hydroxyacylsphingosine 1-beta-galactosyltransferase OS=Homo sapiens OX=9606 GN=UGT8 PE=1 SV=2	-0.167653	6.97015	-0.707593	0.484154	0.899421	-5.1088
sp|P13987|CD59_HUMAN	CD59	CD59 glycoprotein OS=Homo sapiens OX=9606 GN=CD59 PE=1 SV=1	-0.0893821	10.6592	-0.885074	0.381031	0.865248	-5.10917
sp|O75521|ECI2_HUMAN	ECI2	Enoyl-CoA delta isomerase 2 OS=Homo sapiens OX=9606 GN=ECI2 PE=1 SV=4	-0.112821	6.68489	-0.831648	0.410661	0.87431	-5.10965
sp|Q13224|NMDE2_HUMAN	GRIN2B	Glutamate receptor ionotropic, NMDA 2B OS=Homo sapiens OX=9606 GN=GRIN2B PE=1 SV=3	0.131634	6.679	0.684733	0.498588	0.900948	-5.10969
sp|Q6YN16|HSDL2_HUMAN	HSDL2	Hydroxysteroid dehydrogenase-like protein 2 OS=Homo sapiens OX=9606 GN=HSDL2 PE=1 SV=1	0.119091	7.78876	0.884028	0.381589	0.865443	-5.10992
sp|Q12767|TMM94_HUMAN	TMEM94	Transmembrane protein 94 OS=Homo sapiens OX=9606 GN=TMEM94 PE=1 SV=1	0.101336	6.67668	0.686522	0.497475	0.900948	-5.11045
sp|Q15369|ELOC_HUMAN	ELOC	Elongin-C OS=Homo sapiens OX=9606 GN=ELOC PE=1 SV=1	0.0755232	7.12848	0.882862	0.382211	0.865558	-5.11076
sp|Q9BZC7|ABCA2_HUMAN	ABCA2	ATP-binding cassette sub-family A member 2 OS=Homo sapiens OX=9606 GN=ABCA2 PE=1 SV=4	0.0699268	7.07293	0.882837	0.382224	0.865558	-5.11078
sp|P56962|STX17_HUMAN	STX17	Syntaxin-17 OS=Homo sapiens OX=9606 GN=STX17 PE=1 SV=2	-0.0792674	7.99446	-0.456947	0.651805	0.934199	-5.1117
sp|P10746|HEM4_HUMAN	UROS	Uroporphyrinogen-III synthase OS=Homo sapiens OX=9606 GN=UROS PE=1 SV=1	0.0159958	5.6525	0.0532568	0.957986	0.99729	-5.1118
sp|Q9UQ16|DYN3_HUMAN	DNM3	Dynamin-3 OS=Homo sapiens OX=9606 GN=DNM3 PE=1 SV=4	0.0779826	7.94532	0.880861	0.383281	0.865905	-5.1122
sp|Q9ULB1|NRX1A_HUMAN	NRXN1	Neurexin-1 OS=Homo sapiens OX=9606 GN=NRXN1 PE=1 SV=1	0.0742893	7.07545	0.879476	0.384023	0.865905	-5.11319
sp|P17213|BPI_HUMAN	BPI	Bactericidal permeability-increasing protein OS=Homo sapiens OX=9606 GN=BPI PE=1 SV=4	-0.27319	7.18948	-0.742976	0.462587	0.895335	-5.11329
sp|Q8NEZ2|VP37A_HUMAN	VPS37A	Vacuolar protein sorting-associated protein 37A OS=Homo sapiens OX=9606 GN=VPS37A PE=1 SV=1	0.0986261	6.08157	0.535638	0.596748	0.923909	-5.1134
sp|Q8WUD1|RAB2B_HUMAN	RAB2B	Ras-related protein Rab-2B OS=Homo sapiens OX=9606 GN=RAB2B PE=1 SV=1	0.0964959	6.56844	0.878951	0.384304	0.865905	-5.11356
sp|P21462|FPR1_HUMAN	FPR1	fMet-Leu-Phe receptor OS=Homo sapiens OX=9606 GN=FPR1 PE=1 SV=3	0.134255	8.3342	0.853484	0.398341	0.870919	-5.11357
tr|A6NEP8|A6NEP8_HUMAN	ABCD1	ATP binding cassette subfamily D member 1 OS=Homo sapiens OX=9606 GN=ABCD1 PE=1 SV=1	-0.0827762	8.30772	-0.564886	0.576802	0.918772	-5.11397
sp|P14324|FPPS_HUMAN	FDPS	Farnesyl pyrophosphate synthase OS=Homo sapiens OX=9606 GN=FDPS PE=1 SV=4	-0.118422	7.5151	-0.877839	0.384901	0.865905	-5.11436
sp|Q969P0|IGSF8_HUMAN	IGSF8	Immunoglobulin superfamily member 8 OS=Homo sapiens OX=9606 GN=IGSF8 PE=1 SV=1	0.124179	9.34639	0.877687	0.384983	0.865905	-5.11447
sp|Q8WWP7|GIMA1_HUMAN	GIMAP1	GTPase IMAP family member 1 OS=Homo sapiens OX=9606 GN=GIMAP1 PE=1 SV=1	-0.123034	7.23851	-0.851517	0.399419	0.870919	-5.11492
sp|P21453|S1PR1_HUMAN	S1PR1	Sphingosine 1-phosphate receptor 1 OS=Homo sapiens OX=9606 GN=S1PR1 PE=1 SV=2	0.25904	7.16971	0.834123	0.409156	0.873923	-5.1152
tr|A0A140T913|A0A140T913_HUMAN	HLA-A	HLA class I histocompatibility antigen, A alpha chain OS=Homo sapiens OX=9606 GN=HLA-A PE=1 SV=1	0.140792	8.13716	0.6929	0.493359	0.900948	-5.11528
sp|P53816|PLAT3_HUMAN	PLAAT3	Phospholipase A and acyltransferase 3 OS=Homo sapiens OX=9606 GN=PLAAT3 PE=1 SV=2	0.0414676	7.15328	0.202038	0.841737	0.976498	-5.11546
sp|Q86UN3|R4RL2_HUMAN	RTN4RL2	Reticulon-4 receptor-like 2 OS=Homo sapiens OX=9606 GN=RTN4RL2 PE=1 SV=1	-0.136904	6.42264	-0.565349	0.576326	0.918772	-5.11618
sp|P51797|CLCN6_HUMAN	CLCN6	H(+)/Cl(-) exchange transporter 6 OS=Homo sapiens OX=9606 GN=CLCN6 PE=1 SV=2	0.0807291	6.77834	0.874758	0.386557	0.86831	-5.11656
sp|Q15031|SYLM_HUMAN	LARS2	Leucine--tRNA ligase, mitochondrial OS=Homo sapiens OX=9606 GN=LARS2 PE=1 SV=2	0.132386	7.32446	0.874635	0.386623	0.86831	-5.11664
sp|Q9NQ86|TRI36_HUMAN	TRIM36	E3 ubiquitin-protein ligase TRIM36 OS=Homo sapiens OX=9606 GN=TRIM36 PE=1 SV=2	-0.077723	5.96464	-0.229614	0.820605	0.973246	-5.11706
sp|Q13131|AAPK1_HUMAN	PRKAA1	5'-AMP-activated protein kinase catalytic subunit alpha-1 OS=Homo sapiens OX=9606 GN=PRKAA1 PE=1 SV=4	-0.0507602	7.48157	-0.873844	0.387048	0.868313	-5.11721
sp|O00305|CACB4_HUMAN	CACNB4	Voltage-dependent L-type calcium channel subunit beta-4 OS=Homo sapiens OX=9606 GN=CACNB4 PE=1 SV=2	0.0980606	6.83461	0.8733	0.387342	0.868495	-5.11759
tr|R4GN18|R4GN18_HUMAN	CD46	CD46 molecule (Fragment) OS=Homo sapiens OX=9606 GN=CD46 PE=1 SV=1	-0.187742	7.23782	-0.846086	0.402407	0.8712	-5.11768
sp|O43432|IF4G3_HUMAN	EIF4G3	Eukaryotic translation initiation factor 4 gamma 3 OS=Homo sapiens OX=9606 GN=EIF4G3 PE=1 SV=2	-0.0883115	7.52648	-0.830338	0.411267	0.874312	-5.11773
sp|Q53EL6|PDCD4_HUMAN	PDCD4	Programmed cell death protein 4 OS=Homo sapiens OX=9606 GN=PDCD4 PE=1 SV=2	0.106355	6.7405	0.478301	0.636579	0.932506	-5.1178
sp|O14874|BCKD_HUMAN	BCKDK	[3-methyl-2-oxobutanoate dehydrogenase [lipoamide]] kinase, mitochondrial OS=Homo sapiens OX=9606 GN=BCKDK PE=1 SV=2	0.107209	7.10386	0.713103	0.480783	0.898247	-5.1179
sp|Q9H6R3|ACSS3_HUMAN	ACSS3	Acyl-CoA synthetase short-chain family member 3, mitochondrial OS=Homo sapiens OX=9606 GN=ACSS3 PE=1 SV=1	0.172048	7.2396	0.859558	0.394904	0.870919	-5.11818
sp|P16157|ANK1_HUMAN	ANK1	Ankyrin-1 OS=Homo sapiens OX=9606 GN=ANK1 PE=1 SV=3	-0.301253	8.56687	-0.871552	0.388285	0.869678	-5.11883
sp|Q14206|RCAN2_HUMAN	RCAN2	Calcipressin-2 OS=Homo sapiens OX=9606 GN=RCAN2 PE=2 SV=3	0.0972148	6.50083	0.558456	0.580959	0.918772	-5.11903
sp|Q96TC7|RMD3_HUMAN	RMDN3	Regulator of microtubule dynamics protein 3 OS=Homo sapiens OX=9606 GN=RMDN3 PE=1 SV=2	0.122033	7.30131	0.869337	0.389481	0.869678	-5.1204
sp|P38117|ETFB_HUMAN	ETFB	Electron transfer flavoprotein subunit beta OS=Homo sapiens OX=9606 GN=ETFB PE=1 SV=3	-0.144485	7.7605	-0.868875	0.389731	0.869678	-5.12073
sp|P35555|FBN1_HUMAN	FBN1	Fibrillin-1 OS=Homo sapiens OX=9606 GN=FBN1 PE=1 SV=4	-0.117306	6.53308	-0.854832	0.397485	0.870919	-5.12146
sp|Q96GG9|DCNL1_HUMAN	DCUN1D1	DCN1-like protein 1 OS=Homo sapiens OX=9606 GN=DCUN1D1 PE=1 SV=1	0.114443	7.17227	0.867647	0.390395	0.869678	-5.1216
sp|P98196|AT11A_HUMAN	ATP11A	Phospholipid-transporting ATPase IH OS=Homo sapiens OX=9606 GN=ATP11A PE=1 SV=3	-0.0842949	6.74667	-0.867476	0.390488	0.869678	-5.12172
sp|O43826|G6PT1_HUMAN	SLC37A4	Glucose-6-phosphate exchanger SLC37A4 OS=Homo sapiens OX=9606 GN=SLC37A4 PE=1 SV=1	-0.100766	7.04685	-0.423618	0.675605	0.944057	-5.12219
sp|P07910|HNRPC_HUMAN	HNRNPC	Heterogeneous nuclear ribonucleoproteins C1/C2 OS=Homo sapiens OX=9606 GN=HNRNPC PE=1 SV=4	0.103966	7.28975	0.866713	0.390901	0.869678	-5.12226
sp|O43143|DHX15_HUMAN	DHX15	ATP-dependent RNA helicase DHX15 OS=Homo sapiens OX=9606 GN=DHX15 PE=1 SV=2	0.0819148	6.72095	0.866591	0.390967	0.869678	-5.12234
sp|Q12860|CNTN1_HUMAN	CNTN1	Contactin-1 OS=Homo sapiens OX=9606 GN=CNTN1 PE=1 SV=1	0.0883504	9.82979	0.866425	0.391057	0.869678	-5.12246
sp|Q9NYZ4|SIGL8_HUMAN	SIGLEC8	Sialic acid-binding Ig-like lectin 8 OS=Homo sapiens OX=9606 GN=SIGLEC8 PE=1 SV=2	-0.125596	6.7745	-0.422593	0.676342	0.944057	-5.1225
sp|O60503|ADCY9_HUMAN	ADCY9	Adenylate cyclase type 9 OS=Homo sapiens OX=9606 GN=ADCY9 PE=1 SV=4	-0.0830732	6.8894	-0.852938	0.398523	0.870919	-5.12277
sp|P56378|ATP68_HUMAN	ATP5MJ	ATP synthase subunit ATP5MJ, mitochondrial OS=Homo sapiens OX=9606 GN=ATP5MJ PE=1 SV=1	-0.0980052	7.39423	-0.437105	0.665776	0.940215	-5.12309
sp|P32455|GBP1_HUMAN	GBP1	Guanylate-binding protein 1 OS=Homo sapiens OX=9606 GN=GBP1 PE=1 SV=2	0.122853	6.7439	0.757953	0.453402	0.891637	-5.12336
sp|P30043|BLVRB_HUMAN	BLVRB	Flavin reductase (NADPH) OS=Homo sapiens OX=9606 GN=BLVRB PE=1 SV=3	0.153456	9.15003	0.864527	0.392087	0.870919	-5.1238
sp|Q8NFW8|NEUA_HUMAN	CMAS	N-acylneuraminate cytidylyltransferase OS=Homo sapiens OX=9606 GN=CMAS PE=1 SV=2	-0.0897374	6.69078	-0.863687	0.392543	0.870919	-5.12439
sp|P32121|ARRB2_HUMAN	ARRB2	Beta-arrestin-2 OS=Homo sapiens OX=9606 GN=ARRB2 PE=1 SV=2	0.124555	6.79491	0.863647	0.392565	0.870919	-5.12442
sp|P25311|ZA2G_HUMAN	AZGP1	Zinc-alpha-2-glycoprotein OS=Homo sapiens OX=9606 GN=AZGP1 PE=1 SV=2	0.0944321	6.90469	0.539106	0.594219	0.922417	-5.12445
sp|Q8IZ83|A16A1_HUMAN	ALDH16A1	Aldehyde dehydrogenase family 16 member A1 OS=Homo sapiens OX=9606 GN=ALDH16A1 PE=1 SV=2	-0.0912443	7.30863	-0.850355	0.39994	0.870919	-5.12456
sp|Q9Y4W6|AFG32_HUMAN	AFG3L2	AFG3-like protein 2 OS=Homo sapiens OX=9606 GN=AFG3L2 PE=1 SV=2	-0.10502	7.58897	-0.862767	0.393043	0.870919	-5.12504
sp|Q9Y5Y2|NUBP2_HUMAN	NUBP2	Cytosolic Fe-S cluster assembly factor NUBP2 OS=Homo sapiens OX=9606 GN=NUBP2 PE=1 SV=1	-0.12577	5.99078	-0.702653	0.487188	0.900948	-5.12511
tr|F6X3N5|F6X3N5_HUMAN	GNB1	G protein subunit beta 1 OS=Homo sapiens OX=9606 GN=GNB1 PE=1 SV=1	0.187587	10.2104	0.849238	0.400555	0.870919	-5.12533
sp|Q9GZQ3|COMD5_HUMAN	COMMD5	COMM domain-containing protein 5 OS=Homo sapiens OX=9606 GN=COMMD5 PE=1 SV=1	-0.107679	6.64824	-0.673185	0.505651	0.902627	-5.12559
sp|P31937|3HIDH_HUMAN	HIBADH	3-hydroxyisobutyrate dehydrogenase, mitochondrial OS=Homo sapiens OX=9606 GN=HIBADH PE=1 SV=2	0.168992	6.77099	0.86141	0.393782	0.870919	-5.12599
sp|Q99943|PLCA_HUMAN	AGPAT1	1-acyl-sn-glycerol-3-phosphate acyltransferase alpha OS=Homo sapiens OX=9606 GN=AGPAT1 PE=1 SV=2	-0.0962458	7.75952	-0.738449	0.465154	0.895335	-5.12707
sp|Q69YW2|STUM_HUMAN	STUM	Protein stum homolog OS=Homo sapiens OX=9606 GN=STUM PE=1 SV=1	0.178763	10.6786	0.859584	0.394777	0.870919	-5.12727
sp|P50440|GATM_HUMAN	GATM	Glycine amidinotransferase, mitochondrial OS=Homo sapiens OX=9606 GN=GATM PE=1 SV=1	0.158462	7.39775	0.833268	0.409512	0.873923	-5.12733
sp|Q96HA7|TONSL_HUMAN	TONSL	Tonsoku-like protein OS=Homo sapiens OX=9606 GN=TONSL PE=1 SV=2	-0.153372	7.91408	-0.653249	0.5184	0.908749	-5.12743
sp|Q9NWV8|BABA1_HUMAN	BABAM1	BRISC and BRCA1-A complex member 1 OS=Homo sapiens OX=9606 GN=BABAM1 PE=1 SV=1	-0.066208	6.99444	-0.404504	0.689413	0.944057	-5.12785
sp|Q9UIC8|LCMT1_HUMAN	LCMT1	Leucine carboxyl methyltransferase 1 OS=Homo sapiens OX=9606 GN=LCMT1 PE=1 SV=2	0.116933	7.06262	0.803626	0.426474	0.879437	-5.12796
sp|P25686|DNJB2_HUMAN	DNAJB2	DnaJ homolog subfamily B member 2 OS=Homo sapiens OX=9606 GN=DNAJB2 PE=1 SV=3	0.0871307	8.4154	0.85851	0.395362	0.870919	-5.12802
sp|P02730|B3AT_HUMAN	SLC4A1	Band 3 anion transport protein OS=Homo sapiens OX=9606 GN=SLC4A1 PE=1 SV=3	-0.254425	10.7481	-0.858306	0.395474	0.870919	-5.12816
sp|P17568|NDUB7_HUMAN	NDUFB7	NADH dehydrogenase [ubiquinone] 1 beta subcomplex subunit 7 OS=Homo sapiens OX=9606 GN=NDUFB7 PE=1 SV=4	0.147608	7.76687	0.857891	0.395701	0.870919	-5.12845
sp|Q00535|CDK5_HUMAN	CDK5	Cyclin-dependent kinase 5 OS=Homo sapiens OX=9606 GN=CDK5 PE=1 SV=3	0.102706	7.64198	0.857412	0.395963	0.870919	-5.12879
sp|Q9UBN7|HDAC6_HUMAN	HDAC6	Histone deacetylase 6 OS=Homo sapiens OX=9606 GN=HDAC6 PE=1 SV=2	-0.0435999	7.09103	-0.164616	0.870679	0.983369	-5.12956
sp|P09914|IFIT1_HUMAN	IFIT1	Interferon-induced protein with tetratricopeptide repeats 1 OS=Homo sapiens OX=9606 GN=IFIT1 PE=1 SV=2	0.116471	7.31366	0.856029	0.396718	0.870919	-5.12975
sp|Q9HCM4|E41L5_HUMAN	EPB41L5	Band 4.1-like protein 5 OS=Homo sapiens OX=9606 GN=EPB41L5 PE=1 SV=3	0.100641	6.71735	0.855715	0.39689	0.870919	-5.12997
sp|Q6GYQ0|RGPA1_HUMAN	RALGAPA1	Ral GTPase-activating protein subunit alpha-1 OS=Homo sapiens OX=9606 GN=RALGAPA1 PE=1 SV=1	-0.111545	6.80127	-0.855513	0.397001	0.870919	-5.13011
sp|Q9H7C9|AAMDC_HUMAN	AAMDC	Mth938 domain-containing protein OS=Homo sapiens OX=9606 GN=AAMDC PE=1 SV=1	0.0979137	6.9364	0.730845	0.469728	0.896508	-5.13012
sp|Q9Y5L3|ENTP2_HUMAN	ENTPD2	Ectonucleoside triphosphate diphosphohydrolase 2 OS=Homo sapiens OX=9606 GN=ENTPD2 PE=1 SV=1	-0.186427	8.12757	-0.855457	0.397031	0.870919	-5.13015
sp|Q99946|PRRT1_HUMAN	PRRT1	Proline-rich transmembrane protein 1 OS=Homo sapiens OX=9606 GN=PRRT1 PE=1 SV=2	0.102281	7.17839	0.855405	0.39706	0.870919	-5.13019
sp|P52758|RIDA_HUMAN	RIDA	2-iminobutanoate/2-iminopropanoate deaminase OS=Homo sapiens OX=9606 GN=RIDA PE=1 SV=1	0.158576	8.56781	0.855164	0.397192	0.870919	-5.13035
sp|P17152|TMM11_HUMAN	TMEM11	Transmembrane protein 11, mitochondrial OS=Homo sapiens OX=9606 GN=TMEM11 PE=1 SV=1	0.167981	6.92309	0.592881	0.557844	0.918772	-5.1309
sp|Q7RTP0|NIPA1_HUMAN	NIPA1	Magnesium transporter NIPA1 OS=Homo sapiens OX=9606 GN=NIPA1 PE=1 SV=1	-0.170476	5.92203	-0.722296	0.4749	0.897034	-5.13095
sp|Q15155|NOMO1_HUMAN	NOMO1	BOS complex subunit NOMO1 OS=Homo sapiens OX=9606 GN=NOMO1 PE=1 SV=5	-0.104113	7.11234	-0.854159	0.397742	0.870919	-5.13105
sp|A0A024R1R8|TMA7B_HUMAN	TMA7B	Translation machinery-associated protein 7B OS=Homo sapiens OX=9606 GN=TMA7B PE=3 SV=1	0.0946519	6.54656	0.758077	0.453197	0.891637	-5.13164
sp|P52565|GDIR1_HUMAN	ARHGDIA	Rho GDP-dissociation inhibitor 1 OS=Homo sapiens OX=9606 GN=ARHGDIA PE=1 SV=3	0.114783	9.44703	0.853109	0.398318	0.870919	-5.13178
sp|Q9HAP6|LIN7B_HUMAN	LIN7B	Protein lin-7 homolog B OS=Homo sapiens OX=9606 GN=LIN7B PE=1 SV=1	0.0827058	6.9256	0.368225	0.715923	0.949532	-5.13183
sp|Q9UI47|CTNA3_HUMAN	CTNNA3	Catenin alpha-3 OS=Homo sapiens OX=9606 GN=CTNNA3 PE=1 SV=2	0.104867	6.37753	0.687136	0.496787	0.900948	-5.13194
sp|Q9Y281|COF2_HUMAN	CFL2	Cofilin-2 OS=Homo sapiens OX=9606 GN=CFL2 PE=1 SV=1	0.121338	7.82533	0.852853	0.398458	0.870919	-5.13196
sp|Q15477|SKI2_HUMAN	SKIC2	SKI2 subunit of superkiller complex protein OS=Homo sapiens OX=9606 GN=SKIC2 PE=1 SV=3	-0.0679044	7.01801	-0.852615	0.398588	0.870919	-5.13213
sp|P51888|PRELP_HUMAN	PRELP	Prolargin OS=Homo sapiens OX=9606 GN=PRELP PE=1 SV=1	-0.157931	7.38338	-0.852608	0.398592	0.870919	-5.13213
sp|Q8N3J5|PPM1K_HUMAN	PPM1K	Protein phosphatase 1K, mitochondrial OS=Homo sapiens OX=9606 GN=PPM1K PE=1 SV=1	-0.0226627	6.40592	-0.0833485	0.934361	0.994642	-5.13287
sp|P02533|K1C14_HUMAN	KRT14	Keratin, type I cytoskeletal 14 OS=Homo sapiens OX=9606 GN=KRT14 PE=1 SV=4	-0.263581	7.6338	-0.587479	0.561417	0.918772	-5.1333
sp|Q96RL7|VP13A_HUMAN	VPS13A	Intermembrane lipid transfer protein VPS13A OS=Homo sapiens OX=9606 GN=VPS13A PE=1 SV=2	-0.0610734	6.64928	-0.850794	0.399588	0.870919	-5.13339
sp|Q13530|SERC3_HUMAN	SERINC3	Serine incorporator 3 OS=Homo sapiens OX=9606 GN=SERINC3 PE=1 SV=2	0.076491	6.70978	0.809595	0.422953	0.879437	-5.13341
sp|Q7Z392|TPC11_HUMAN	TRAPPC11	Trafficking protein particle complex subunit 11 OS=Homo sapiens OX=9606 GN=TRAPPC11 PE=1 SV=2	-0.0779143	6.93079	-0.850543	0.399726	0.870919	-5.13356
sp|P26378|ELAV4_HUMAN	ELAVL4	ELAV-like protein 4 OS=Homo sapiens OX=9606 GN=ELAVL4 PE=1 SV=3	-0.119466	7.26811	-0.822187	0.415717	0.87884	-5.13377
sp|Q15283|RASA2_HUMAN	RASA2	Ras GTPase-activating protein 2 OS=Homo sapiens OX=9606 GN=RASA2 PE=1 SV=3	0.110232	6.62998	0.542558	0.591715	0.920784	-5.13422
sp|Q9NV96|CC50A_HUMAN	TMEM30A	Cell cycle control protein 50A OS=Homo sapiens OX=9606 GN=TMEM30A PE=1 SV=1	-0.135334	8.87358	-0.849556	0.400269	0.870919	-5.13425
sp|P49189|AL9A1_HUMAN	ALDH9A1	4-trimethylaminobutyraldehyde dehydrogenase OS=Homo sapiens OX=9606 GN=ALDH9A1 PE=1 SV=3	-0.133759	8.63648	-0.849348	0.400383	0.870919	-5.13439
sp|Q9UNA1|RHG26_HUMAN	ARHGAP26	Rho GTPase-activating protein 26 OS=Homo sapiens OX=9606 GN=ARHGAP26 PE=1 SV=1	-0.201658	7.67144	-0.848579	0.400807	0.871004	-5.13492
sp|Q92597|NDRG1_HUMAN	NDRG1	Protein NDRG1 OS=Homo sapiens OX=9606 GN=NDRG1 PE=1 SV=1	0.0875483	8.86059	0.847621	0.401334	0.8712	-5.13559
[truncated: 2,093 more rows]

## Sheet: 22 female samples
Accession.Number	Genes	Protein.Description	logFC	AveExpr	t	P.Value	adj.P.Val	B
sp|O43493|TGON2_HUMAN	TGOLN2	Trans-Golgi network integral membrane protein 2 OS=Homo sapiens OX=9606 GN=TGOLN2 PE=1 SV=4	-0.872378	6.54211	-4.64794	9.08556e-05	0.371781	0.765443
sp|P16219|ACADS_HUMAN	ACADS	Short-chain specific acyl-CoA dehydrogenase, mitochondrial OS=Homo sapiens OX=9606 GN=ACADS PE=1 SV=1	0.820402	7.79875	3.94609	0.00056116	0.422969	-0.539346
sp|P42892|ECE1_HUMAN	ECE1	Endothelin-converting enzyme 1 OS=Homo sapiens OX=9606 GN=ECE1 PE=1 SV=2	-0.565455	7.19622	-3.81816	0.000779281	0.422969	-0.777775
sp|P49760|CLK2_HUMAN	CLK2	Dual specificity protein kinase CLK2 OS=Homo sapiens OX=9606 GN=CLK2 PE=1 SV=1	0.569502	7.74232	3.79088	0.000835612	0.422969	-0.828549
sp|Q96AJ9|VTI1A_HUMAN	VTI1A	Vesicle transport through interaction with t-SNAREs homolog 1A OS=Homo sapiens OX=9606 GN=VTI1A PE=1 SV=2	-0.620293	6.68893	-3.91667	0.000726942	0.422969	-0.830916
tr|C9J0J7|C9J0J7_HUMAN	PFN2	Profilin OS=Homo sapiens OX=9606 GN=PFN2 PE=1 SV=1	1.07835	7.09254	3.78256	0.00085359	0.422969	-0.844041
tr|A0A8V8TQK7|A0A8V8TQK7_HUMAN	CLTC	Clathrin heavy chain (Fragment) OS=Homo sapiens OX=9606 GN=CLTC PE=1 SV=1	1.07134	9.01587	3.86513	0.000881539	0.422969	-1.01206
sp|Q9UBG0|MRC2_HUMAN	MRC2	C-type mannose receptor 2 OS=Homo sapiens OX=9606 GN=MRC2 PE=1 SV=2	-0.75052	6.71283	-3.67227	0.0011307	0.422969	-1.04891
sp|P46782|RS5_HUMAN	RPS5	40S ribosomal protein S5 OS=Homo sapiens OX=9606 GN=RPS5 PE=1 SV=4	-0.696391	8.44652	-3.65933	0.00116849	0.422969	-1.0729
sp|Q9H2W6|RM46_HUMAN	MRPL46	39S ribosomal protein L46, mitochondrial OS=Homo sapiens OX=9606 GN=MRPL46 PE=1 SV=1	0.563756	6.70475	3.75635	0.00107486	0.422969	-1.10137
sp|P33151|CADH5_HUMAN	CDH5	Cadherin-5 OS=Homo sapiens OX=9606 GN=CDH5 PE=1 SV=5	-0.597409	6.91527	-3.78255	0.00107421	0.422969	-1.13684
sp|O43809|CPSF5_HUMAN	NUDT21	Cleavage and polyadenylation specificity factor subunit 5 OS=Homo sapiens OX=9606 GN=NUDT21 PE=1 SV=1	0.678107	7.32323	3.5836	0.00141576	0.422969	-1.21307
sp|Q9H9S4|CB39L_HUMAN	CAB39L	Calcium-binding protein 39-like OS=Homo sapiens OX=9606 GN=CAB39L PE=1 SV=3	0.657704	7.08251	3.51727	0.00167378	0.422969	-1.33547
sp|P31949|S10AB_HUMAN	S100A11	Protein S100-A11 OS=Homo sapiens OX=9606 GN=S100A11 PE=1 SV=2	-1.17724	9.11571	-3.48855	0.00179921	0.422969	-1.38834
sp|P20339|RAB5A_HUMAN	RAB5A	Ras-related protein Rab-5A OS=Homo sapiens OX=9606 GN=RAB5A PE=1 SV=2	0.449266	8.66162	3.48562	0.00181253	0.422969	-1.39373
sp|Q9GZV7|HPLN2_HUMAN	HAPLN2	Hyaluronan and proteoglycan link protein 2 OS=Homo sapiens OX=9606 GN=HAPLN2 PE=1 SV=1	1.22995	9.91595	3.47747	0.00185005	0.422969	-1.40873
sp|O95674|CDS2_HUMAN	CDS2	Phosphatidate cytidylyltransferase 2 OS=Homo sapiens OX=9606 GN=CDS2 PE=1 SV=1	-0.779175	7.51588	-3.44783	0.00199289	0.429205	-1.46316
sp|P02652|APOA2_HUMAN	APOA2	Apolipoprotein A-II OS=Homo sapiens OX=9606 GN=APOA2 PE=1 SV=1	-1.1294	7.71546	-3.52997	0.00186057	0.422969	-1.48326
sp|Q96DD7|SHSA4_HUMAN	SHISA4	Protein shisa-4 OS=Homo sapiens OX=9606 GN=SHISA4 PE=1 SV=3	0.696456	7.43262	3.39731	0.00226143	0.448489	-1.55574
sp|P01871|IGHM_HUMAN	IGHM	Immunoglobulin heavy constant mu OS=Homo sapiens OX=9606 GN=IGHM PE=1 SV=4	-1.35191	8.38811	-3.38911	0.00230823	0.448489	-1.57074
sp|Q9Y2S7|PDIP2_HUMAN	POLDIP2	Polymerase delta-interacting protein 2 OS=Homo sapiens OX=9606 GN=POLDIP2 PE=1 SV=1	0.969911	6.34314	3.76661	0.00164919	0.422969	-1.68419
sp|P48549|KCNJ3_HUMAN	KCNJ3	G protein-activated inward rectifier potassium channel 1 OS=Homo sapiens OX=9606 GN=KCNJ3 PE=1 SV=1	0.577853	7.86221	3.39479	0.0025749	0.448489	-1.71055
sp|P46721|SO1A2_HUMAN	SLCO1A2	Solute carrier organic anion transporter family member 1A2 OS=Homo sapiens OX=9606 GN=SLCO1A2 PE=1 SV=1	-0.602228	6.64103	-3.39004	0.00260437	0.448489	-1.71852
sp|P51636|CAV2_HUMAN	CAV2	Caveolin-2 OS=Homo sapiens OX=9606 GN=CAV2 PE=1 SV=2	-1.38648	8.18257	-3.30695	0.00293481	0.48037	-1.76309
sp|O15321|TM9S1_HUMAN	TM9SF1	Transmembrane 9 superfamily member 1 OS=Homo sapiens OX=9606 GN=TM9SF1 PE=2 SV=2	-0.711192	7.38772	-3.45236	0.00263044	0.448489	-1.81398
sp|P13611|CSPG2_HUMAN	VCAN	Versican core protein OS=Homo sapiens OX=9606 GN=VCAN PE=1 SV=3	0.642798	9.18594	3.2411	0.00333284	0.490906	-1.83999
sp|Q96S97|MYADM_HUMAN	MYADM	Myeloid-associated differentiation marker OS=Homo sapiens OX=9606 GN=MYADM PE=1 SV=2	0.751018	7.3278	3.26138	0.00328072	0.490906	-1.8437
sp|Q92633|LPAR1_HUMAN	LPAR1	Lysophosphatidic acid receptor 1 OS=Homo sapiens OX=9606 GN=LPAR1 PE=1 SV=3	-1.32717	6.31856	-3.23131	0.0036586	0.490906	-1.93746
sp|Q13409|DC1I2_HUMAN	DYNC1I2	Cytoplasmic dynein 1 intermediate chain 2 OS=Homo sapiens OX=9606 GN=DYNC1I2 PE=1 SV=3	-0.400607	7.37917	-3.14388	0.00423155	0.490906	-2.01507
sp|Q4U2R8|S22A6_HUMAN	SLC22A6	Solute carrier family 22 member 6 OS=Homo sapiens OX=9606 GN=SLC22A6 PE=1 SV=1	-0.719031	7.41467	-3.17452	0.00419221	0.490906	-2.0384
sp|O15244|S22A2_HUMAN	SLC22A2	Solute carrier family 22 member 2 OS=Homo sapiens OX=9606 GN=SLC22A2 PE=1 SV=2	-1.0169	6.77761	-3.16237	0.00431578	0.490906	-2.0591
sp|Q9UHD9|UBQL2_HUMAN	UBQLN2	Ubiquilin-2 OS=Homo sapiens OX=9606 GN=UBQLN2 PE=1 SV=2	-0.759349	5.91734	-3.1788	0.00430377	0.490906	-2.07114
sp|Q9NZ32|ARP10_HUMAN	ACTR10	Actin-related protein 10 OS=Homo sapiens OX=9606 GN=ACTR10 PE=1 SV=1	0.403382	7.168	3.10948	0.00460214	0.490906	-2.07664
sp|P10915|HPLN1_HUMAN	HAPLN1	Hyaluronan and proteoglycan link protein 1 OS=Homo sapiens OX=9606 GN=HAPLN1 PE=2 SV=2	0.605021	8.25376	3.09607	0.00475489	0.490906	-2.10059
sp|P61225|RAP2B_HUMAN	RAP2B	Ras-related protein Rap-2b OS=Homo sapiens OX=9606 GN=RAP2B PE=1 SV=1	-0.711553	7.9727	-3.09152	0.00480782	0.490906	-2.1087
sp|P60866|RS20_HUMAN	RPS20	40S ribosomal protein S20 OS=Homo sapiens OX=9606 GN=RPS20 PE=1 SV=1	-0.734447	10.5524	-3.08839	0.00484449	0.490906	-2.11428
sp|P07099|HYEP_HUMAN	EPHX1	Epoxide hydrolase 1 OS=Homo sapiens OX=9606 GN=EPHX1 PE=1 SV=1	-0.541034	8.83065	-3.08666	0.00486491	0.490906	-2.11736
sp|Q6AZY7|SCAR3_HUMAN	SCARA3	Scavenger receptor class A member 3 OS=Homo sapiens OX=9606 GN=SCARA3 PE=1 SV=1	-0.989151	6.34067	-3.35507	0.00369695	0.490906	-2.12582
sp|P30050|RL12_HUMAN	RPL12	60S ribosomal protein L12 OS=Homo sapiens OX=9606 GN=RPL12 PE=1 SV=1	-0.382197	7.94924	-3.07423	0.00501407	0.490906	-2.13951
sp|Q8TEA7|TBCK_HUMAN	TBCK	TBC domain-containing protein kinase-like protein OS=Homo sapiens OX=9606 GN=TBCK PE=1 SV=4	-0.684997	6.56643	-3.46794	0.00337289	0.490906	-2.18403
tr|F6X3N5|F6X3N5_HUMAN	GNB1	G protein subunit beta 1 OS=Homo sapiens OX=9606 GN=GNB1 PE=1 SV=1	0.851748	10.2562	3.06278	0.00530507	0.490906	-2.19161
sp|P53708|ITA8_HUMAN	ITGA8	Integrin alpha-8 OS=Homo sapiens OX=9606 GN=ITGA8 PE=1 SV=3	-0.510784	7.22523	-3.08876	0.00531894	0.490906	-2.22012
sp|Q9P2R7|SUCB1_HUMAN	SUCLA2	Succinate--CoA ligase [ADP-forming] subunit beta, mitochondrial OS=Homo sapiens OX=9606 GN=SUCLA2 PE=1 SV=3	0.418227	8.78546	3.01185	0.00583118	0.490906	-2.25019
sp|P31942|HNRH3_HUMAN	HNRNPH3	Heterogeneous nuclear ribonucleoprotein H3 OS=Homo sapiens OX=9606 GN=HNRNPH3 PE=1 SV=2	-0.466929	8.46446	-3.016	0.0059332	0.490906	-2.27262
sp|Q99959|PKP2_HUMAN	PKP2	Plakophilin-2 OS=Homo sapiens OX=9606 GN=PKP2 PE=1 SV=2	-0.548183	6.91291	-3.01408	0.00596042	0.490906	-2.27594
sp|P61204|ARF3_HUMAN	ARF3	ADP-ribosylation factor 3 OS=Homo sapiens OX=9606 GN=ARF3 PE=1 SV=2	0.439127	10.5771	2.99392	0.00608857	0.490906	-2.28185
sp|Q99442|SEC62_HUMAN	SEC62	Translocation protein SEC62 OS=Homo sapiens OX=9606 GN=SEC62 PE=1 SV=1	-0.420605	7.50876	-2.99166	0.00612175	0.490906	-2.28583
sp|P08174|DAF_HUMAN	CD55	Complement decay-accelerating factor OS=Homo sapiens OX=9606 GN=CD55 PE=1 SV=4	-0.52467	7.80126	-2.99147	0.0061246	0.490906	-2.28617
sp|Q16288|NTRK3_HUMAN	NTRK3	NT-3 growth factor receptor OS=Homo sapiens OX=9606 GN=NTRK3 PE=1 SV=2	-0.32647	7.24847	-2.98932	0.00615643	0.490906	-2.28997
sp|P02768|ALBU_HUMAN	ALB	Albumin OS=Homo sapiens OX=9606 GN=ALB PE=1 SV=2	-0.725361	9.43068	-2.98638	0.00620006	0.490906	-2.29515
sp|P62851|RS25_HUMAN	RPS25	40S ribosomal protein S25 OS=Homo sapiens OX=9606 GN=RPS25 PE=1 SV=1	-0.866555	10.3119	-2.98382	0.00623829	0.490906	-2.29965
sp|P08708|RS17_HUMAN	RPS17	40S ribosomal protein S17 OS=Homo sapiens OX=9606 GN=RPS17 PE=1 SV=2	-0.707585	7.81626	-2.95741	0.00664667	0.511049	-2.34612
tr|A0A1B0GTW6|A0A1B0GTW6_HUMAN	EPB41L1	Erythrocyte membrane protein band 4.1 like 1 OS=Homo sapiens OX=9606 GN=EPB41L1 PE=1 SV=2	0.770785	5.96056	2.97067	0.0067971	0.511049	-2.38015
sp|Q8WWT9|S13A3_HUMAN	SLC13A3	Na(+)/dicarboxylate cotransporter 3 OS=Homo sapiens OX=9606 GN=SLC13A3 PE=1 SV=1	-1.02304	6.77104	-2.95336	0.00688644	0.511049	-2.38047
sp|P25098|ARBK1_HUMAN	GRK2	Beta-adrenergic receptor kinase 1 OS=Homo sapiens OX=9606 GN=GRK2 PE=1 SV=2	0.275002	7.0978	2.90994	0.0074456	0.511049	-2.42926
sp|P62913|RL11_HUMAN	RPL11	60S ribosomal protein L11 OS=Homo sapiens OX=9606 GN=RPL11 PE=1 SV=2	-0.572843	9.04604	-2.89851	0.00765119	0.511049	-2.4492
sp|P16112|PGCA_HUMAN	ACAN	Aggrecan core protein OS=Homo sapiens OX=9606 GN=ACAN PE=1 SV=3	0.941872	7.50104	2.89815	0.00765768	0.511049	-2.44982
sp|P49207|RL34_HUMAN	RPL34	60S ribosomal protein L34 OS=Homo sapiens OX=9606 GN=RPL34 PE=1 SV=3	-0.715983	7.33484	-2.91135	0.00760581	0.511049	-2.45237
sp|P61513|RL37A_HUMAN	RPL37A	60S ribosomal protein L37a OS=Homo sapiens OX=9606 GN=RPL37A PE=1 SV=2	-0.534079	7.44422	-2.87381	0.00811392	0.511049	-2.49219
sp|P29966|MARCS_HUMAN	MARCKS	Myristoylated alanine-rich C-kinase substrate OS=Homo sapiens OX=9606 GN=MARCKS PE=1 SV=4	-0.609119	8.5629	-2.86944	0.00819837	0.511049	-2.49977
sp|Q16890|TPD53_HUMAN	TPD52L1	Tumor protein D53 OS=Homo sapiens OX=9606 GN=TPD52L1 PE=1 SV=1	-0.489886	7.74812	-2.98868	0.00747534	0.511049	-2.50681
sp|Q9UMS0|NFU1_HUMAN	NFU1	NFU1 iron-sulfur cluster scaffold homolog, mitochondrial OS=Homo sapiens OX=9606 GN=NFU1 PE=1 SV=2	0.712308	6.38993	2.91036	0.00830189	0.511049	-2.54845
sp|P57105|SYJ2B_HUMAN	SYNJ2BP	Synaptojanin-2-binding protein OS=Homo sapiens OX=9606 GN=SYNJ2BP PE=1 SV=2	-0.517858	7.54704	-2.82007	0.00921397	0.511049	-2.5852
sp|P48509|CD151_HUMAN	CD151	CD151 antigen OS=Homo sapiens OX=9606 GN=CD151 PE=1 SV=3	-0.80591	8.95539	-2.84725	0.00906444	0.511049	-2.58588
sp|Q9HBL8|NMRL1_HUMAN	NMRAL1	NmrA-like family domain-containing protein 1 OS=Homo sapiens OX=9606 GN=NMRAL1 PE=1 SV=1	0.663051	5.96546	3.27822	0.0058647	0.490906	-2.60475
sp|P62269|RS18_HUMAN	RPS18	40S ribosomal protein S18 OS=Homo sapiens OX=9606 GN=RPS18 PE=1 SV=3	-0.591173	9.21723	-2.80785	0.00948304	0.511049	-2.60625
sp|P17813|EGLN_HUMAN	ENG	Endoglin OS=Homo sapiens OX=9606 GN=ENG PE=1 SV=2	-0.525714	7.86954	-2.80371	0.00957583	0.511049	-2.61337
sp|Q92504|S39A7_HUMAN	SLC39A7	Zinc transporter SLC39A7 OS=Homo sapiens OX=9606 GN=SLC39A7 PE=1 SV=2	-0.808383	7.01523	-2.80038	0.00965123	0.511049	-2.6191
sp|O14924|RGS12_HUMAN	RGS12	Regulator of G-protein signaling 12 OS=Homo sapiens OX=9606 GN=RGS12 PE=1 SV=1	0.645992	6.64796	2.8694	0.00940348	0.511049	-2.64523
sp|P84103|SRSF3_HUMAN	SRSF3	Serine/arginine-rich splicing factor 3 OS=Homo sapiens OX=9606 GN=SRSF3 PE=1 SV=1	0.318886	7.25227	2.7842	0.0100252	0.511049	-2.64689
sp|Q9H299|SH3L3_HUMAN	SH3BGRL3	SH3 domain-binding glutamic acid-rich-like protein 3 OS=Homo sapiens OX=9606 GN=SH3BGRL3 PE=1 SV=1	-0.670043	8.96175	-2.79556	0.0099771	0.511049	-2.64857
sp|P20648|ATP4A_HUMAN	ATP4A	Potassium-transporting ATPase alpha chain 1 OS=Homo sapiens OX=9606 GN=ATP4A PE=1 SV=5	0.737763	10.9739	2.78267	0.0100611	0.511049	-2.6495
sp|Q9NPF4|OSGEP_HUMAN	OSGEP	tRNA N6-adenosine threonylcarbamoyltransferase OS=Homo sapiens OX=9606 GN=OSGEP PE=1 SV=1	0.473649	6.96107	2.84371	0.00965599	0.511049	-2.6529
sp|P50213|IDH3A_HUMAN	IDH3A	Isocitrate dehydrogenase [NAD] subunit alpha, mitochondrial OS=Homo sapiens OX=9606 GN=IDH3A PE=1 SV=1	0.441516	8.8374	2.77196	0.010317	0.511049	-2.66786
sp|Q5EBM0|CMPK2_HUMAN	CMPK2	UMP-CMP kinase 2, mitochondrial OS=Homo sapiens OX=9606 GN=CMPK2 PE=1 SV=3	0.547307	7.29588	2.87826	0.00954349	0.511049	-2.66994
sp|P62249|RS16_HUMAN	RPS16	40S ribosomal protein S16 OS=Homo sapiens OX=9606 GN=RPS16 PE=1 SV=2	-0.577888	9.75316	-2.76789	0.0104158	0.511049	-2.67482
sp|Q9UPY6|WASF3_HUMAN	WASF3	Actin-binding protein WASF3 OS=Homo sapiens OX=9606 GN=WASF3 PE=1 SV=2	-0.888478	7.74584	-2.76516	0.0104827	0.511049	-2.67949
sp|Q92526|TCPW_HUMAN	CCT6B	T-complex protein 1 subunit zeta-2 OS=Homo sapiens OX=9606 GN=CCT6B PE=1 SV=5	1.1764	8.87292	2.7763	0.0104338	0.511049	-2.6809
sp|Q9BSD7|NTPCR_HUMAN	NTPCR	Cancer-related nucleoside-triphosphatase OS=Homo sapiens OX=9606 GN=NTPCR PE=1 SV=1	0.436972	6.80028	2.76362	0.0105205	0.511049	-2.68212
sp|O14594|NCAN_HUMAN	NCAN	Neurocan core protein OS=Homo sapiens OX=9606 GN=NCAN PE=1 SV=3	0.422144	8.57569	2.76264	0.0105445	0.511049	-2.68379
sp|Q9ULP0|NDRG4_HUMAN	NDRG4	Protein NDRG4 OS=Homo sapiens OX=9606 GN=NDRG4 PE=1 SV=2	0.372195	8.14458	2.75784	0.0106636	0.511049	-2.69199
sp|Q9BZZ2|SN_HUMAN	SIGLEC1	Sialoadhesin OS=Homo sapiens OX=9606 GN=SIGLEC1 PE=1 SV=2	-0.561582	6.24925	-2.77966	0.0105943	0.511049	-2.69924
sp|Q8IUA7|ABCA9_HUMAN	ABCA9	ATP-binding cassette sub-family A member 9 OS=Homo sapiens OX=9606 GN=ABCA9 PE=1 SV=1	-0.494448	7.55927	-2.7506	0.0108457	0.511049	-2.70436
sp|P02743|SAMP_HUMAN	APCS	Serum amyloid P-component OS=Homo sapiens OX=9606 GN=APCS PE=1 SV=2	-0.857627	7.98747	-2.76151	0.0107979	0.511049	-2.70567
sp|P62266|RS23_HUMAN	RPS23	40S ribosomal protein S23 OS=Homo sapiens OX=9606 GN=RPS23 PE=1 SV=3	-0.299525	8.51848	-2.74418	0.0110095	0.511049	-2.71531
sp|Q15041|AR6P1_HUMAN	ARL6IP1	ADP-ribosylation factor-like protein 6-interacting protein 1 OS=Homo sapiens OX=9606 GN=ARL6IP1 PE=1 SV=2	-0.49455	7.94482	-2.73231	0.0113185	0.511049	-2.73551
sp|P16157|ANK1_HUMAN	ANK1	Ankyrin-1 OS=Homo sapiens OX=9606 GN=ANK1 PE=1 SV=3	-1.03239	8.2573	-2.72283	0.0115712	0.511049	-2.75163
sp|Q92575|UBXN4_HUMAN	UBXN4	UBX domain-containing protein 4 OS=Homo sapiens OX=9606 GN=UBXN4 PE=1 SV=2	-0.536959	6.43287	-2.74401	0.0114966	0.511049	-2.75557
sp|P50225|ST1A1_HUMAN	SULT1A1	Sulfotransferase 1A1 OS=Homo sapiens OX=9606 GN=SULT1A1 PE=1 SV=3	-0.617664	7.68251	-2.71829	0.011694	0.511049	-2.75933
sp|Q07954|LRP1_HUMAN	LRP1	Prolow-density lipoprotein receptor-related protein 1 OS=Homo sapiens OX=9606 GN=LRP1 PE=1 SV=2	-0.398519	7.96359	-2.70233	0.0121359	0.511049	-2.7864
sp|Q9H0A8|COMD4_HUMAN	COMMD4	COMM domain-containing protein 4 OS=Homo sapiens OX=9606 GN=COMMD4 PE=1 SV=1	0.858032	6.06829	2.96365	0.0095302	0.511049	-2.78697
sp|Q9P0J1|PDP1_HUMAN	PDP1	[Pyruvate dehydrogenase [acetyl-transferring]]-phosphatase 1, mitochondrial OS=Homo sapiens OX=9606 GN=PDP1 PE=1 SV=3	0.911505	7.38255	2.82964	0.0110069	0.511049	-2.79612
sp|P53597|SUCA_HUMAN	SUCLG1	Succinate--CoA ligase [ADP/GDP-forming] subunit alpha, mitochondrial OS=Homo sapiens OX=9606 GN=SUCLG1 PE=1 SV=4	0.425602	8.30774	2.69341	0.0123895	0.511049	-2.80148
sp|Q9H4M9|EHD1_HUMAN	EHD1	EH domain-containing protein 1 OS=Homo sapiens OX=9606 GN=EHD1 PE=1 SV=2	-0.346741	7.53632	-2.68642	0.0125917	0.511049	-2.81328
sp|Q9UNM6|PSD13_HUMAN	PSMD13	26S proteasome non-ATPase regulatory subunit 13 OS=Homo sapiens OX=9606 GN=PSMD13 PE=1 SV=2	-0.37523	7.67881	-2.6845	0.0126479	0.511049	-2.81653
sp|Q12931|TRAP1_HUMAN	TRAP1	Heat shock protein 75 kDa, mitochondrial OS=Homo sapiens OX=9606 GN=TRAP1 PE=1 SV=3	0.407586	8.56606	2.68105	0.0127492	0.511049	-2.82235
sp|P22102|PUR2_HUMAN	GART	Trifunctional purine biosynthetic protein adenosine-3 OS=Homo sapiens OX=9606 GN=GART PE=1 SV=1	-0.31874	7.15025	-2.65978	0.0133913	0.511049	-2.85816
sp|P46977|STT3A_HUMAN	STT3A	Dolichyl-diphosphooligosaccharide--protein glycosyltransferase subunit STT3A OS=Homo sapiens OX=9606 GN=STT3A PE=1 SV=2	-0.518866	7.69762	-2.65837	0.013435	0.511049	-2.86053
sp|Q9NP81|SYSM_HUMAN	SARS2	Serine--tRNA ligase, mitochondrial OS=Homo sapiens OX=9606 GN=SARS2 PE=1 SV=1	0.590653	6.2826	2.64542	0.0138418	0.511049	-2.88226
sp|P22612|KAPCG_HUMAN	PRKACG	cAMP-dependent protein kinase catalytic subunit gamma OS=Homo sapiens OX=9606 GN=PRKACG PE=1 SV=3	0.756337	7.65408	2.66513	0.013758	0.511049	-2.88358
sp|P22570|ADRO_HUMAN	FDXR	NADPH:adrenodoxin oxidoreductase, mitochondrial OS=Homo sapiens OX=9606 GN=FDXR PE=1 SV=3	0.422449	7.13935	2.64259	0.0139322	0.511049	-2.887
sp|P63218|GBG5_HUMAN	GNG5	Guanine nucleotide-binding protein G(I)/G(S)/G(O) subunit gamma-5 OS=Homo sapiens OX=9606 GN=GNG5 PE=1 SV=3	-0.645357	10.0888	-2.64095	0.0139849	0.511049	-2.88975
sp|P00414|COX3_HUMAN	MT-CO3	Cytochrome c oxidase subunit 3 OS=Homo sapiens OX=9606 GN=MT-CO3 PE=1 SV=2	-0.591663	8.36715	-2.63146	0.0142931	0.511049	-2.90562
sp|P09493|TPM1_HUMAN	TPM1	Tropomyosin alpha-1 chain OS=Homo sapiens OX=9606 GN=TPM1 PE=1 SV=2	-0.407671	7.19746	-2.62565	0.0144852	0.511049	-2.91534
sp|Q8N5M9|JAGN1_HUMAN	JAGN1	Protein jagunal homolog 1 OS=Homo sapiens OX=9606 GN=JAGN1 PE=1 SV=1	-0.524196	6.80101	-2.61925	0.0146994	0.511049	-2.92602
sp|Q9UH03|SEPT3_HUMAN	SEPTIN3	Neuronal-specific septin-3 OS=Homo sapiens OX=9606 GN=SEPTIN3 PE=1 SV=3	0.375108	8.83887	2.6191	0.0147043	0.511049	-2.92627
sp|P25942|TNR5_HUMAN	CD40	Tumor necrosis factor receptor superfamily member 5 OS=Homo sapiens OX=9606 GN=CD40 PE=1 SV=1	-0.58767	7.74637	-2.70486	0.0139384	0.511049	-2.92726
sp|O60841|IF2P_HUMAN	EIF5B	Eukaryotic translation initiation factor 5B OS=Homo sapiens OX=9606 GN=EIF5B PE=1 SV=4	0.389073	6.65575	2.62636	0.0147268	0.511049	-2.9294
sp|Q9BWD1|THIC_HUMAN	ACAT2	Acetyl-CoA acetyltransferase, cytosolic OS=Homo sapiens OX=9606 GN=ACAT2 PE=1 SV=2	-0.666404	7.60256	-2.61598	0.01481	0.511049	-2.93148
sp|Q96AX2|RAB37_HUMAN	RAB37	Ras-related protein Rab-37 OS=Homo sapiens OX=9606 GN=RAB37 PE=1 SV=3	-0.648776	7.02092	-2.66256	0.0144811	0.511049	-2.93292
sp|P02749|APOH_HUMAN	APOH	Beta-2-glycoprotein 1 OS=Homo sapiens OX=9606 GN=APOH PE=1 SV=3	-0.84259	7.18248	-2.6144	0.0148637	0.511049	-2.93411
sp|Q92752|TENR_HUMAN	TNR	Tenascin-R OS=Homo sapiens OX=9606 GN=TNR PE=1 SV=3	0.415692	8.67201	2.60239	0.0152779	0.511049	-2.95411
sp|Q9UGT4|SUSD2_HUMAN	SUSD2	Sushi domain-containing protein 2 OS=Homo sapiens OX=9606 GN=SUSD2 PE=1 SV=1	-0.610316	8.60267	-2.60199	0.0152919	0.511049	-2.95478
sp|O00264|PGRC1_HUMAN	PGRMC1	Membrane-associated progesterone receptor component 1 OS=Homo sapiens OX=9606 GN=PGRMC1 PE=1 SV=3	-0.715043	8.4323	-2.60073	0.015336	0.511049	-2.95687
sp|P23396|RS3_HUMAN	RPS3	40S ribosomal protein S3 OS=Homo sapiens OX=9606 GN=RPS3 PE=1 SV=2	-0.548345	9.20342	-2.59477	0.0155462	0.511049	-2.96677
sp|P78369|CLD10_HUMAN	CLDN10	Claudin-10 OS=Homo sapiens OX=9606 GN=CLDN10 PE=1 SV=2	-0.771684	6.71951	-2.58892	0.0157552	0.511049	-2.97648
sp|Q96HD1|CREL1_HUMAN	CRELD1	Protein disulfide isomerase CRELD1 OS=Homo sapiens OX=9606 GN=CRELD1 PE=1 SV=3	-0.626201	6.36175	-2.58822	0.0157805	0.511049	-2.97764
sp|Q9H6K4|OPA3_HUMAN	OPA3	Optic atrophy 3 protein OS=Homo sapiens OX=9606 GN=OPA3 PE=1 SV=1	-0.600652	7.78879	-2.59235	0.015908	0.511049	-2.9849
sp|Q09666|AHNK_HUMAN	AHNAK	Neuroblast differentiation-associated protein AHNAK OS=Homo sapiens OX=9606 GN=AHNAK PE=1 SV=2	-0.555135	7.49934	-2.582	0.0160061	0.511049	-2.98796
sp|Q10471|GALT2_HUMAN	GALNT2	Polypeptide N-acetylgalactosaminyltransferase 2 OS=Homo sapiens OX=9606 GN=GALNT2 PE=1 SV=1	-0.48516	7.61192	-2.61158	0.0158485	0.511049	-2.98829
sp|Q9BQ69|MACD1_HUMAN	MACROD1	ADP-ribose glycohydrolase MACROD1 OS=Homo sapiens OX=9606 GN=MACROD1 PE=1 SV=2	0.400927	7.37758	2.57806	0.0161502	0.511049	-2.99448
sp|P46783|RS10_HUMAN	RPS10	40S ribosomal protein S10 OS=Homo sapiens OX=9606 GN=RPS10 PE=1 SV=1	-0.474202	7.79517	-2.57151	0.016393	0.511049	-3.00532
sp|O75781|PALM_HUMAN	PALM	Paralemmin-1 OS=Homo sapiens OX=9606 GN=PALM PE=1 SV=2	-0.427213	7.63064	-2.57079	0.0164198	0.511049	-3.00651
sp|P02689|MYP2_HUMAN	PMP2	Myelin P2 protein OS=Homo sapiens OX=9606 GN=PMP2 PE=1 SV=3	0.771588	7.65864	2.57001	0.0164489	0.511049	-3.0078
sp|Q9UKU7|ACAD8_HUMAN	ACAD8	Isobutyryl-CoA dehydrogenase, mitochondrial OS=Homo sapiens OX=9606 GN=ACAD8 PE=1 SV=1	0.445754	7.42222	2.56487	0.0166425	0.511049	-3.01629
sp|O60220|TIM8A_HUMAN	TIMM8A	Mitochondrial import inner membrane translocase subunit Tim8 A OS=Homo sapiens OX=9606 GN=TIMM8A PE=1 SV=1	0.348275	7.97403	2.55936	0.0168523	0.511049	-3.02539
sp|P51572|BAP31_HUMAN	BCAP31	B-cell receptor-associated protein 31 OS=Homo sapiens OX=9606 GN=BCAP31 PE=1 SV=3	-0.386662	7.65883	-2.55933	0.0168532	0.511049	-3.02543
sp|P60201|MYPR_HUMAN	PLP1	Myelin proteolipid protein OS=Homo sapiens OX=9606 GN=PLP1 PE=1 SV=2	0.527693	12.0817	2.5581	0.0169006	0.511049	-3.02747
sp|P12074|CX6A1_HUMAN	COX6A1	Cytochrome c oxidase subunit 6A1, mitochondrial OS=Homo sapiens OX=9606 GN=COX6A1 PE=1 SV=4	-0.882157	8.08557	-2.56442	0.0172545	0.511049	-3.04469
sp|P30533|AMRP_HUMAN	LRPAP1	Alpha-2-macroglobulin receptor-associated protein OS=Homo sapiens OX=9606 GN=LRPAP1 PE=1 SV=1	-0.349901	7.38701	-2.54683	0.0173382	0.511049	-3.04603
sp|O75608|LYPA1_HUMAN	LYPLA1	Acyl-protein thioesterase 1 OS=Homo sapiens OX=9606 GN=LYPLA1 PE=1 SV=1	0.454264	8.2034	2.54009	0.0176051	0.511049	-3.05712
sp|P08865|RSSA_HUMAN	RPSA	40S ribosomal protein SA OS=Homo sapiens OX=9606 GN=RPSA PE=1 SV=4	-0.786598	8.66162	-2.5333	0.0178775	0.511049	-3.06827
sp|P05060|SCG1_HUMAN	CHGB	Secretogranin-1 OS=Homo sapiens OX=9606 GN=CHGB PE=1 SV=2	-0.508691	6.83528	-2.53987	0.0179057	0.511049	-3.06989
sp|Q96GW7|PGCB_HUMAN	BCAN	Brevican core protein OS=Homo sapiens OX=9606 GN=BCAN PE=1 SV=2	0.381864	8.15856	2.52163	0.018355	0.511049	-3.08739
sp|Q96RU3|FNBP1_HUMAN	FNBP1	Formin-binding protein 1 OS=Homo sapiens OX=9606 GN=FNBP1 PE=1 SV=2	0.332388	7.26264	2.53894	0.0186126	0.511049	-3.101
sp|Q14126|DSG2_HUMAN	DSG2	Desmoglein-2 OS=Homo sapiens OX=9606 GN=DSG2 PE=1 SV=2	-0.711846	7.11584	-2.58131	0.0181825	0.511049	-3.10102
sp|P09619|PGFRB_HUMAN	PDGFRB	Platelet-derived growth factor receptor beta OS=Homo sapiens OX=9606 GN=PDGFRB PE=1 SV=1	-0.569313	7.54063	-2.51283	0.0187234	0.511049	-3.1018
sp|P35527|K1C9_HUMAN	KRT9	Keratin, type I cytoskeletal 9 OS=Homo sapiens OX=9606 GN=KRT9 PE=1 SV=3	-1.7133	8.46832	-2.55116	0.0184991	0.511049	-3.10182
sp|Q15311|RBP1_HUMAN	RALBP1	RalA-binding protein 1 OS=Homo sapiens OX=9606 GN=RALBP1 PE=1 SV=3	-0.39056	7.18798	-2.53772	0.0186629	0.511049	-3.10571
sp|O60928|KCJ13_HUMAN	KCNJ13	Inward rectifier potassium channel 13 OS=Homo sapiens OX=9606 GN=KCNJ13 PE=1 SV=1	-0.962006	7.42332	-2.57635	0.0183763	0.511049	-3.10811
sp|P51398|RT29_HUMAN	DAP3	28S ribosomal protein S29, mitochondrial OS=Homo sapiens OX=9606 GN=DAP3 PE=1 SV=1	0.566177	6.68145	2.55603	0.0187229	0.511049	-3.11404
sp|Q16527|CSRP2_HUMAN	CSRP2	Cysteine and glycine-rich protein 2 OS=Homo sapiens OX=9606 GN=CSRP2 PE=1 SV=3	0.677138	7.76535	2.51193	0.019062	0.511049	-3.11479
sp|P04424|ARLY_HUMAN	ASL	Argininosuccinate lyase OS=Homo sapiens OX=9606 GN=ASL PE=1 SV=4	-0.660959	6.80065	-2.68913	0.0159738	0.511049	-3.1148
sp|Q92629|SGCD_HUMAN	SGCD	Delta-sarcoglycan OS=Homo sapiens OX=9606 GN=SGCD PE=1 SV=2	-0.491389	7.0925	-2.50116	0.0192219	0.511049	-3.12084
sp|Q96I51|RCC1L_HUMAN	RCC1L	RCC1-like G exchanging factor-like protein OS=Homo sapiens OX=9606 GN=RCC1L PE=1 SV=3	0.892621	6.42609	2.6855	0.016767	0.511049	-3.12187
sp|Q05655|KPCD_HUMAN	PRKCD	Protein kinase C delta type OS=Homo sapiens OX=9606 GN=PRKCD PE=1 SV=2	-0.586779	7.01156	-2.56402	0.0188659	0.511049	-3.12568
sp|P17677|NEUM_HUMAN	GAP43	Neuromodulin OS=Homo sapiens OX=9606 GN=GAP43 PE=1 SV=1	-0.569143	8.71011	-2.49616	0.0194395	0.511049	-3.129
sp|P51784|UBP11_HUMAN	USP11	Ubiquitin carboxyl-terminal hydrolase 11 OS=Homo sapiens OX=9606 GN=USP11 PE=1 SV=3	0.498949	6.10394	2.62304	0.0176667	0.511049	-3.12906
sp|Q9Y3D9|RT23_HUMAN	MRPS23	28S ribosomal protein S23, mitochondrial OS=Homo sapiens OX=9606 GN=MRPS23 PE=1 SV=2	0.725737	6.63657	2.50268	0.0194598	0.511049	-3.1296
sp|P30044|PRDX5_HUMAN	PRDX5	Peroxiredoxin-5, mitochondrial OS=Homo sapiens OX=9606 GN=PRDX5 PE=1 SV=4	0.394939	8.82781	2.49557	0.0194648	0.511049	-3.12995
sp|Q9Y653|AGRG1_HUMAN	ADGRG1	Adhesion G-protein coupled receptor G1 OS=Homo sapiens OX=9606 GN=ADGRG1 PE=1 SV=2	-0.371769	7.65108	-2.49335	0.0195623	0.511049	-3.13356
sp|O14498|ISLR_HUMAN	ISLR	Immunoglobulin superfamily containing leucine-rich repeat protein OS=Homo sapiens OX=9606 GN=ISLR PE=2 SV=1	0.488116	6.59107	2.70313	0.0161816	0.511049	-3.13411
sp|Q8NFZ4|NLGN2_HUMAN	NLGN2	Neuroligin-2 OS=Homo sapiens OX=9606 GN=NLGN2 PE=1 SV=1	-0.475634	6.45252	-2.48314	0.0200161	0.511049	-3.15017
sp|Q9UBM7|DHCR7_HUMAN	DHCR7	7-dehydrocholesterol reductase OS=Homo sapiens OX=9606 GN=DHCR7 PE=1 SV=1	-0.613927	6.95407	-2.48881	0.0200711	0.511049	-3.15177
sp|Q02952|AKA12_HUMAN	AKAP12	A-kinase anchor protein 12 OS=Homo sapiens OX=9606 GN=AKAP12 PE=1 SV=4	-0.362716	7.05318	-2.48196	0.020069	0.511049	-3.15209
sp|P19338|NUCL_HUMAN	NCL	Nucleolin OS=Homo sapiens OX=9606 GN=NCL PE=1 SV=3	-0.581988	7.31708	-2.48056	0.020132	0.511049	-3.15435
sp|Q9NUQ9|CYRIB_HUMAN	CYRIB	CYFIP-related Rac1 interactor B OS=Homo sapiens OX=9606 GN=CYRIB PE=1 SV=1	0.359262	7.30928	2.48009	0.0201533	0.511049	-3.15512
sp|P80723|BASP1_HUMAN	BASP1	Brain acid soluble protein 1 OS=Homo sapiens OX=9606 GN=BASP1 PE=1 SV=2	-0.540196	10.1289	-2.47491	0.0203888	0.511049	-3.16353
sp|Q9H2C0|GAN_HUMAN	GAN	Gigaxonin OS=Homo sapiens OX=9606 GN=GAN PE=1 SV=1	-0.472287	7.27739	-2.50386	0.0205034	0.511049	-3.17107
sp|P49590|SYHM_HUMAN	HARS2	Histidine--tRNA ligase, mitochondrial OS=Homo sapiens OX=9606 GN=HARS2 PE=1 SV=1	0.701861	7.34373	2.46886	0.020667	0.511049	-3.17334
sp|P05026|AT1B1_HUMAN	ATP1B1	Sodium/potassium-transporting ATPase subunit beta-1 OS=Homo sapiens OX=9606 GN=ATP1B1 PE=1 SV=1	0.333859	11.2629	2.46789	0.0207116	0.511049	-3.1749
sp|Q7Z6J4|FGD2_HUMAN	FGD2	FYVE, RhoGEF and PH domain-containing protein 2 OS=Homo sapiens OX=9606 GN=FGD2 PE=1 SV=1	-0.628518	6.02938	-2.59939	0.0191975	0.511049	-3.17566
sp|P24311|COX7B_HUMAN	COX7B	Cytochrome c oxidase subunit 7B, mitochondrial OS=Homo sapiens OX=9606 GN=COX7B PE=1 SV=2	-0.638747	9.31596	-2.46602	0.0207983	0.511049	-3.17792
sp|Q8N684|CPSF7_HUMAN	CPSF7	Cleavage and polyadenylation specificity factor subunit 7 OS=Homo sapiens OX=9606 GN=CPSF7 PE=1 SV=1	0.451124	7.16766	2.46514	0.0208393	0.511049	-3.17935
sp|P34741|SDC2_HUMAN	SDC2	Syndecan-2 OS=Homo sapiens OX=9606 GN=SDC2 PE=1 SV=2	-0.658141	6.86843	-2.47122	0.0208719	0.511049	-3.17979
sp|P02042|HBD_HUMAN	HBD	Hemoglobin subunit delta OS=Homo sapiens OX=9606 GN=HBD PE=1 SV=2	-0.565062	9.85823	-2.46335	0.020923	0.511049	-3.18225
sp|O75381|PEX14_HUMAN	PEX14	Peroxisomal membrane protein PEX14 OS=Homo sapiens OX=9606 GN=PEX14 PE=1 SV=1	0.54663	7.21655	2.47623	0.0209815	0.511049	-3.18345
sp|Q9HB21|PKHA1_HUMAN	PLEKHA1	Pleckstrin homology domain-containing family A member 1 OS=Homo sapiens OX=9606 GN=PLEKHA1 PE=1 SV=2	-0.770244	7.28344	-2.59093	0.0195314	0.511049	-3.18638
sp|Q9Y2Q3|GSTK1_HUMAN	GSTK1	Glutathione S-transferase kappa 1 OS=Homo sapiens OX=9606 GN=GSTK1 PE=1 SV=3	0.42327	7.05934	2.45423	0.0213536	0.511878	-3.19699
sp|O00483|NDUA4_HUMAN	NDUFA4	Cytochrome c oxidase subunit NDUFA4 OS=Homo sapiens OX=9606 GN=NDUFA4 PE=1 SV=1	-0.561192	9.30607	-2.44791	0.021657	0.511878	-3.20719
sp|P35813|PPM1A_HUMAN	PPM1A	Protein phosphatase 1A OS=Homo sapiens OX=9606 GN=PPM1A PE=1 SV=1	0.2307	7.44203	2.44658	0.0217213	0.511878	-3.20933
sp|Q9Y2I1|NISCH_HUMAN	NISCH	Nischarin OS=Homo sapiens OX=9606 GN=NISCH PE=1 SV=3	0.353548	6.60157	2.44226	0.0219312	0.511878	-3.21628
sp|Q96S06|LMF1_HUMAN	LMF1	Lipase maturation factor 1 OS=Homo sapiens OX=9606 GN=LMF1 PE=1 SV=1	-0.687177	6.02322	-2.53336	0.0212742	0.511878	-3.22894
sp|P63208|SKP1_HUMAN	SKP1	S-phase kinase-associated protein 1 OS=Homo sapiens OX=9606 GN=SKP1 PE=1 SV=2	-0.360241	7.65988	-2.43298	0.0223889	0.511878	-3.23121
sp|Q9UPQ0|LIMC1_HUMAN	LIMCH1	LIM and calponin homology domains-containing protein 1 OS=Homo sapiens OX=9606 GN=LIMCH1 PE=1 SV=4	0.322147	6.964	2.44502	0.0224708	0.511878	-3.2327
sp|P78536|ADA17_HUMAN	ADAM17	Disintegrin and metalloproteinase domain-containing protein 17 OS=Homo sapiens OX=9606 GN=ADAM17 PE=1 SV=1	-0.552959	7.20906	-2.44083	0.022678	0.511878	-3.2385
sp|P02686|MBP_HUMAN	MBP	Myelin basic protein OS=Homo sapiens OX=9606 GN=MBP PE=1 SV=3	0.476897	11.9932	2.42617	0.0227304	0.511878	-3.24215
sp|Q8NBJ4|GOLM1_HUMAN	GOLM1	Golgi membrane protein 1 OS=Homo sapiens OX=9606 GN=GOLM1 PE=1 SV=1	-0.480939	7.65545	-2.42424	0.0228282	0.511878	-3.24525
sp|P00533|EGFR_HUMAN	EGFR	Epidermal growth factor receptor OS=Homo sapiens OX=9606 GN=EGFR PE=1 SV=2	-0.338055	7.48063	-2.42335	0.0228735	0.511878	-3.24668
sp|Q9Y2R0|COA3_HUMAN	COA3	Cytochrome c oxidase assembly factor 3 homolog, mitochondrial OS=Homo sapiens OX=9606 GN=COA3 PE=1 SV=1	-0.469454	7.4181	-2.43369	0.0230352	0.511878	-3.25021
tr|A0A1C7CYX9|A0A1C7CYX9_HUMAN	DPYSL2	Dihydropyrimidinase like 2 OS=Homo sapiens OX=9606 GN=DPYSL2 PE=1 SV=1	-0.463852	8.09466	-2.41996	0.0230459	0.511878	-3.2521
sp|Q9Y2C4|EXOG_HUMAN	EXOG	Nuclease EXOG, mitochondrial OS=Homo sapiens OX=9606 GN=EXOG PE=1 SV=2	-0.453466	6.78665	-2.41788	0.0231527	0.511878	-3.25544
sp|Q9P2E7|PCD10_HUMAN	PCDH10	Protocadherin-10 OS=Homo sapiens OX=9606 GN=PCDH10 PE=1 SV=2	-0.767765	7.09983	-2.54021	0.0216538	0.511878	-3.26324
sp|Q96BS2|CHP3_HUMAN	TESC	Calcineurin B homologous protein 3 OS=Homo sapiens OX=9606 GN=TESC PE=1 SV=3	0.391997	7.84681	2.41155	0.0234801	0.511878	-3.26558
sp|P63096|GNAI1_HUMAN	GNAI1	Guanine nucleotide-binding protein G(i) subunit alpha-1 OS=Homo sapiens OX=9606 GN=GNAI1 PE=1 SV=2	0.296949	11.0427	2.4107	0.0235239	0.511878	-3.26692
sp|P14406|CX7A2_HUMAN	COX7A2	Cytochrome c oxidase subunit 7A2, mitochondrial OS=Homo sapiens OX=9606 GN=COX7A2 PE=1 SV=1	-1.2333	9.5281	-2.40918	0.0236033	0.511878	-3.26936
sp|P14923|PLAK_HUMAN	JUP	Junction plakoglobin OS=Homo sapiens OX=9606 GN=JUP PE=1 SV=3	-0.482364	6.67852	-2.41849	0.0238128	0.511878	-3.27303
sp|Q8IYB4|PEX5R_HUMAN	PEX5L	PEX5-related protein OS=Homo sapiens OX=9606 GN=PEX5L PE=1 SV=2	0.462249	7.16454	2.40978	0.0239058	0.511878	-3.27684
sp|Q9GZT8|NIF3L_HUMAN	NIF3L1	NIF3-like protein 1 OS=Homo sapiens OX=9606 GN=NIF3L1 PE=1 SV=2	-0.378646	7.47311	-2.39762	0.0242148	0.511878	-3.28781
sp|P62701|RS4X_HUMAN	RPS4X	40S ribosomal protein S4, X isoform OS=Homo sapiens OX=9606 GN=RPS4X PE=1 SV=2	-0.316252	8.7746	-2.39612	0.0242951	0.511878	-3.2902
sp|Q9H1E3|NUCKS_HUMAN	NUCKS1	Nuclear ubiquitous casein and cyclin-dependent kinase substrate 1 OS=Homo sapiens OX=9606 GN=NUCKS1 PE=1 SV=1	-0.467692	6.68958	-2.42324	0.024393	0.511878	-3.29086
sp|P14207|FOLR2_HUMAN	FOLR2	Folate receptor beta OS=Homo sapiens OX=9606 GN=FOLR2 PE=1 SV=4	-0.736556	8.22001	-2.39479	0.0243669	0.511878	-3.29233
sp|P36578|RL4_HUMAN	RPL4	60S ribosomal protein L4 OS=Homo sapiens OX=9606 GN=RPL4 PE=1 SV=5	-0.27828	7.43896	-2.39478	0.0243674	0.511878	-3.29234
sp|Q8NE35|CPEB3_HUMAN	CPEB3	Cytoplasmic polyadenylation element-binding protein 3 OS=Homo sapiens OX=9606 GN=CPEB3 PE=1 SV=2	0.538681	6.15524	2.43294	0.0243646	0.511878	-3.29284
sp|Q13574|DGKZ_HUMAN	DGKZ	Diacylglycerol kinase zeta OS=Homo sapiens OX=9606 GN=DGKZ PE=1 SV=4	-0.425033	6.95353	-2.40535	0.0249046	0.513428	-3.30456
sp|Q9BRX8|PXL2A_HUMAN	PRXL2A	Peroxiredoxin-like 2A OS=Homo sapiens OX=9606 GN=PRXL2A PE=1 SV=3	-0.356877	7.5439	-2.38679	0.0248006	0.513428	-3.30505
sp|Q9NTX5|ECHD1_HUMAN	ECHDC1	Ethylmalonyl-CoA decarboxylase OS=Homo sapiens OX=9606 GN=ECHDC1 PE=1 SV=2	0.45084	7.88873	2.38329	0.0249932	0.513428	-3.31063
sp|Q9NUJ1|ABHDA_HUMAN	ABHD10	Palmitoyl-protein thioesterase ABHD10, mitochondrial OS=Homo sapiens OX=9606 GN=ABHD10 PE=1 SV=1	0.425514	7.00399	2.3808	0.0251304	0.513428	-3.31457
sp|Q86WG5|MTMRD_HUMAN	SBF2	Myotubularin-related protein 13 OS=Homo sapiens OX=9606 GN=SBF2 PE=1 SV=1	-0.295506	6.75129	-2.38052	0.0254886	0.513428	-3.3226
sp|Q13564|ULA1_HUMAN	NAE1	NEDD8-activating enzyme E1 regulatory subunit OS=Homo sapiens OX=9606 GN=NAE1 PE=1 SV=1	-0.510167	7.54681	-2.37451	0.0254812	0.513428	-3.32456
sp|P49406|RM19_HUMAN	MRPL19	39S ribosomal protein L19, mitochondrial OS=Homo sapiens OX=9606 GN=MRPL19 PE=1 SV=2	0.387028	7.11239	2.4116	0.0254912	0.513428	-3.32674
sp|P13807|GYS1_HUMAN	GYS1	Glycogen [starch] synthase, muscle OS=Homo sapiens OX=9606 GN=GYS1 PE=1 SV=2	-0.323757	7.69449	-2.37305	0.025563	0.513428	-3.32687
sp|P05455|LA_HUMAN	SSB	Lupus La protein OS=Homo sapiens OX=9606 GN=SSB PE=1 SV=2	-0.338239	6.81445	-2.37048	0.0257077	0.513428	-3.33094
sp|Q9UPW5|CBPC1_HUMAN	AGTPBP1	Cytosolic carboxypeptidase 1 OS=Homo sapiens OX=9606 GN=AGTPBP1 PE=1 SV=3	-0.360565	6.41227	-2.3791	0.0259424	0.513428	-3.33353
sp|Q6L8Q7|PDE12_HUMAN	PDE12	2',5'-phosphodiesterase 12 OS=Homo sapiens OX=9606 GN=PDE12 PE=1 SV=2	0.487282	7.02381	2.37857	0.0259725	0.513428	-3.33435
sp|O75369|FLNB_HUMAN	FLNB	Filamin-B OS=Homo sapiens OX=9606 GN=FLNB PE=1 SV=2	-0.310409	6.92322	-2.36628	0.0259462	0.513428	-3.33759
sp|P22732|GTR5_HUMAN	SLC2A5	Solute carrier family 2, facilitated glucose transporter member 5 OS=Homo sapiens OX=9606 GN=SLC2A5 PE=1 SV=1	-0.424937	7.90165	-2.35858	0.0263888	0.519149	-3.34977
sp|O15173|PGRC2_HUMAN	PGRMC2	Membrane-associated progesterone receptor component 2 OS=Homo sapiens OX=9606 GN=PGRMC2 PE=1 SV=1	-0.573447	7.83142	-2.35618	0.0265282	0.519394	-3.35356
sp|O75064|DEN4B_HUMAN	DENND4B	DENN domain-containing protein 4B OS=Homo sapiens OX=9606 GN=DENND4B PE=1 SV=4	0.357153	6.89144	2.36122	0.0269661	0.52357	-3.36122
sp|Q9UP95|S12A4_HUMAN	SLC12A4	Solute carrier family 12 member 4 OS=Homo sapiens OX=9606 GN=SLC12A4 PE=1 SV=2	-0.312265	7.34541	-2.34517	0.0271762	0.52357	-3.37093
sp|Q96C24|SYTL4_HUMAN	SYTL4	Synaptotagmin-like protein 4 OS=Homo sapiens OX=9606 GN=SYTL4 PE=1 SV=2	-0.461152	6.47595	-2.3543	0.0273719	0.52357	-3.37172
sp|Q9UNN5|FAF1_HUMAN	FAF1	FAS-associated factor 1 OS=Homo sapiens OX=9606 GN=FAF1 PE=1 SV=2	0.401897	6.57739	2.34813	0.0273535	0.52357	-3.37292
sp|P43007|SATT_HUMAN	SLC1A4	Neutral amino acid transporter A OS=Homo sapiens OX=9606 GN=SLC1A4 PE=1 SV=1	-0.482916	8.69234	-2.34122	0.027412	0.52357	-3.37714
sp|Q96D96|HVCN1_HUMAN	HVCN1	Voltage-gated hydrogen channel 1 OS=Homo sapiens OX=9606 GN=HVCN1 PE=1 SV=1	-0.484518	7.05122	-2.33838	0.0275825	0.52357	-3.3816
sp|Q86VX2|COMD7_HUMAN	COMMD7	COMM domain-containing protein 7 OS=Homo sapiens OX=9606 GN=COMMD7 PE=1 SV=2	0.370706	6.87861	2.34522	0.027913	0.52357	-3.38548
sp|P36405|ARL3_HUMAN	ARL3	ADP-ribosylation factor-like protein 3 OS=Homo sapiens OX=9606 GN=ARL3 PE=1 SV=2	0.370165	7.94385	2.33338	0.0278855	0.52357	-3.38946
sp|Q9UHQ9|NB5R1_HUMAN	CYB5R1	NADH-cytochrome b5 reductase 1 OS=Homo sapiens OX=9606 GN=CYB5R1 PE=1 SV=1	-0.475848	8.69478	-2.3325	0.0279393	0.52357	-3.39084
sp|Q8TF74|WIPF2_HUMAN	WIPF2	WAS/WASL-interacting protein family member 2 OS=Homo sapiens OX=9606 GN=WIPF2 PE=1 SV=1	-0.856988	5.99329	-2.59225	0.0220668	0.511878	-3.39237
sp|Q8NAT1|PMGT2_HUMAN	POMGNT2	Protein O-linked-mannose beta-1,4-N-acetylglucosaminyltransferase 2 OS=Homo sapiens OX=9606 GN=POMGNT2 PE=1 SV=1	-0.600814	6.99032	-2.33061	0.0280545	0.52357	-3.3938
sp|P68871|HBB_HUMAN	HBB	Hemoglobin subunit beta OS=Homo sapiens OX=9606 GN=HBB PE=1 SV=2	-0.439391	12.1765	-2.32847	0.0281859	0.52357	-3.39716
sp|Q9NRS6|SNX15_HUMAN	SNX15	Sorting nexin-15 OS=Homo sapiens OX=9606 GN=SNX15 PE=1 SV=1	-0.397488	7.33541	-2.3528	0.0288502	0.526185	-3.40724
sp|P20591|MX1_HUMAN	MX1	Interferon-induced GTP-binding protein Mx1 OS=Homo sapiens OX=9606 GN=MX1 PE=1 SV=4	0.557276	7.09455	2.32065	0.0286709	0.526185	-3.40942
sp|O95810|CAVN2_HUMAN	CAVIN2	Caveolae-associated protein 2 OS=Homo sapiens OX=9606 GN=CAVIN2 PE=1 SV=3	-0.467709	7.81937	-2.31811	0.0288296	0.526185	-3.41338
sp|Q9BU23|LMF2_HUMAN	LMF2	Lipase maturation factor 2 OS=Homo sapiens OX=9606 GN=LMF2 PE=1 SV=2	-0.653573	7.95711	-2.34932	0.0290611	0.526185	-3.41475
sp|Q14542|S29A2_HUMAN	SLC29A2	Equilibrative nucleoside transporter 2 OS=Homo sapiens OX=9606 GN=SLC29A2 PE=1 SV=3	-0.808113	5.67685	-2.40776	0.0282769	0.52357	-3.42639
sp|P62244|RS15A_HUMAN	RPS15A	40S ribosomal protein S15a OS=Homo sapiens OX=9606 GN=RPS15A PE=1 SV=2	-0.446402	8.80089	-2.30558	0.0296263	0.530785	-3.43296
sp|Q12929|EPS8_HUMAN	EPS8	Epidermal growth factor receptor kinase substrate 8 OS=Homo sapiens OX=9606 GN=EPS8 PE=1 SV=1	0.728196	5.89666	2.38286	0.0289386	0.526185	-3.43587
sp|Q15223|NECT1_HUMAN	NECTIN1	Nectin-1 OS=Homo sapiens OX=9606 GN=NECTIN1 PE=1 SV=3	0.519231	7.31198	2.30066	0.0299444	0.530785	-3.44062
sp|O43852|CALU_HUMAN	CALU	Calumenin OS=Homo sapiens OX=9606 GN=CALU PE=1 SV=2	-0.437701	7.91533	-2.30037	0.0299634	0.530785	-3.44108
sp|P60903|S10AA_HUMAN	S100A10	Protein S100-A10 OS=Homo sapiens OX=9606 GN=S100A10 PE=1 SV=2	-0.886916	9.70447	-2.29813	0.0301093	0.530785	-3.44456
sp|P62280|RS11_HUMAN	RPS11	40S ribosomal protein S11 OS=Homo sapiens OX=9606 GN=RPS11 PE=1 SV=3	-0.283335	8.20705	-2.29804	0.0301155	0.530785	-3.44471
sp|P80748|LV321_HUMAN	IGLV3-21	Immunoglobulin lambda variable 3-21 OS=Homo sapiens OX=9606 GN=IGLV3-21 PE=1 SV=2	-0.736554	6.85578	-2.30138	0.0302659	0.530785	-3.44487
sp|Q68DH5|LMBD2_HUMAN	LMBRD2	G-protein coupled receptor-associated protein LMBRD2 OS=Homo sapiens OX=9606 GN=LMBRD2 PE=1 SV=1	-0.482068	7.52432	-2.29581	0.030261	0.530785	-3.44817
sp|Q9Y666|S12A7_HUMAN	SLC12A7	Solute carrier family 12 member 7 OS=Homo sapiens OX=9606 GN=SLC12A7 PE=1 SV=3	-0.544883	6.18066	-2.30611	0.0307953	0.530785	-3.4523
sp|Q9BV35|SCMC3_HUMAN	SLC25A23	Calcium-binding mitochondrial carrier protein SCaMC-3 OS=Homo sapiens OX=9606 GN=SLC25A23 PE=1 SV=2	-0.47906	7.33391	-2.29288	0.0308248	0.530785	-3.45786
sp|P35749|MYH11_HUMAN	MYH11	Myosin-11 OS=Homo sapiens OX=9606 GN=MYH11 PE=1 SV=3	-0.423504	7.22435	-2.28919	0.0306983	0.530785	-3.45846
sp|Q96MP8|KCTD7_HUMAN	KCTD7	BTB/POZ domain-containing protein KCTD7 OS=Homo sapiens OX=9606 GN=KCTD7 PE=1 SV=1	-0.487462	6.69244	-2.30168	0.031086	0.530785	-3.45883
sp|Q9UBU2|DKK2_HUMAN	DKK2	Dickkopf-related protein 2 OS=Homo sapiens OX=9606 GN=DKK2 PE=1 SV=1	-0.470694	6.38487	-2.29618	0.0310095	0.530785	-3.45918
sp|Q99767|APBA2_HUMAN	APBA2	Amyloid-beta A4 precursor protein-binding family A member 2 OS=Homo sapiens OX=9606 GN=APBA2 PE=1 SV=3	0.28583	7.31012	2.28835	0.0307547	0.530785	-3.45977
sp|P54727|RD23B_HUMAN	RAD23B	UV excision repair protein RAD23 homolog B OS=Homo sapiens OX=9606 GN=RAD23B PE=1 SV=1	-0.344658	7.25448	-2.28273	0.0311311	0.530785	-3.46849
sp|P00387|NB5R3_HUMAN	CYB5R3	NADH-cytochrome b5 reductase 3 OS=Homo sapiens OX=9606 GN=CYB5R3 PE=1 SV=3	-0.502431	9.09834	-2.27918	0.0313706	0.531267	-3.47399
sp|P53582|MAP11_HUMAN	METAP1	Methionine aminopeptidase 1 OS=Homo sapiens OX=9606 GN=METAP1 PE=1 SV=2	-0.469179	6.33805	-2.29611	0.0319383	0.531267	-3.47604
sp|P05067|A4_HUMAN	APP	Amyloid-beta precursor protein OS=Homo sapiens OX=9606 GN=APP PE=1 SV=3	0.311609	8.36304	2.27579	0.0316012	0.531267	-3.47924
sp|Q9NNX6|CD209_HUMAN	CD209	CD209 antigen OS=Homo sapiens OX=9606 GN=CD209 PE=1 SV=1	-0.771844	7.60232	-2.28576	0.0321513	0.532644	-3.48221
sp|O43837|IDH3B_HUMAN	IDH3B	Isocitrate dehydrogenase [NAD] subunit beta, mitochondrial OS=Homo sapiens OX=9606 GN=IDH3B PE=1 SV=2	0.289646	8.18221	2.27274	0.03181	0.531267	-3.48395
sp|Q15056|IF4H_HUMAN	EIF4H	Eukaryotic translation initiation factor 4H OS=Homo sapiens OX=9606 GN=EIF4H PE=1 SV=5	0.343542	7.71489	2.27269	0.0318137	0.531267	-3.48404
sp|Q9NZ01|TECR_HUMAN	TECR	Very-long-chain enoyl-CoA reductase OS=Homo sapiens OX=9606 GN=TECR PE=1 SV=1	-0.453215	8.10548	-2.27159	0.0318891	0.531267	-3.48573
sp|P22413|ENPP1_HUMAN	ENPP1	Ectonucleotide pyrophosphatase/phosphodiesterase family member 1 OS=Homo sapiens OX=9606 GN=ENPP1 PE=1 SV=2	-0.506277	7.09945	-2.28515	0.0326809	0.536953	-3.49236
sp|Q9Y3C8|UFC1_HUMAN	UFC1	Ubiquitin-fold modifier-conjugating enzyme 1 OS=Homo sapiens OX=9606 GN=UFC1 PE=1 SV=3	0.347969	7.27601	2.29606	0.0330675	0.536953	-3.49975
sp|Q7Z6G8|ANS1B_HUMAN	ANKS1B	Ankyrin repeat and sterile alpha motif domain-containing protein 1B OS=Homo sapiens OX=9606 GN=ANKS1B PE=1 SV=2	0.411683	7.6135	2.25926	0.0327481	0.536953	-3.50477
sp|P15924|DESP_HUMAN	DSP	Desmoplakin OS=Homo sapiens OX=9606 GN=DSP PE=1 SV=3	-0.348313	6.94246	-2.26122	0.0329911	0.536953	-3.50603
sp|P00325|ADH1B_HUMAN	ADH1B	All-trans-retinol dehydrogenase [NAD(+)] ADH1B OS=Homo sapiens OX=9606 GN=ADH1B PE=1 SV=3	-0.76642	7.61585	-2.25814	0.0328273	0.536953	-3.50649
sp|Q6GQQ9|OTU7B_HUMAN	OTUD7B	OTU domain-containing protein 7B OS=Homo sapiens OX=9606 GN=OTUD7B PE=1 SV=1	0.456585	7.15178	2.2765	0.0338198	0.540588	-3.51452
sp|P41732|TSN7_HUMAN	TSPAN7	Tetraspanin-7 OS=Homo sapiens OX=9606 GN=TSPAN7 PE=1 SV=2	0.527444	7.79642	2.25068	0.0333577	0.539525	-3.51796
sp|Q6UX71|PXDC2_HUMAN	PLXDC2	Plexin domain-containing protein 2 OS=Homo sapiens OX=9606 GN=PLXDC2 PE=1 SV=1	-0.428754	7.02566	-2.24809	0.0335442	0.540405	-3.52195
sp|P16452|EPB42_HUMAN	EPB42	Protein 4.2 OS=Homo sapiens OX=9606 GN=EPB42 PE=1 SV=3	-0.892524	9.04112	-2.24443	0.0338086	0.540588	-3.52757
sp|Q03135|CAV1_HUMAN	CAV1	Caveolin-1 OS=Homo sapiens OX=9606 GN=CAV1 PE=1 SV=4	-0.638697	8.47301	-2.24094	0.0340627	0.542353	-3.53292
sp|Q15738|NSDHL_HUMAN	NSDHL	Sterol-4-alpha-carboxylate 3-dehydrogenase, decarboxylating OS=Homo sapiens OX=9606 GN=NSDHL PE=1 SV=2	-0.518172	7.08894	-2.24117	0.0344329	0.542398	-3.53632
sp|P02786|TFR1_HUMAN	TFRC	Transferrin receptor protein 1 OS=Homo sapiens OX=9606 GN=TFRC PE=1 SV=2	-0.444704	7.63832	-2.23477	0.0345165	0.542398	-3.54238
tr|J3QKL5|J3QKL5_HUMAN	MBP	Myelin basic protein (Fragment) OS=Homo sapiens OX=9606 GN=MBP PE=1 SV=1	0.497602	7.08084	2.23448	0.0345381	0.542398	-3.54283
tr|A0A087WTZ8|A0A087WTZ8_HUMAN	NSMCE2	NSE2 (MMS21) homolog, SMC5-SMC6 complex SUMO ligase OS=Homo sapiens OX=9606 GN=NSMCE2 PE=1 SV=1	0.375138	6.95413	2.23094	0.0351909	0.542398	-3.55173
sp|P62195|PRS8_HUMAN	PSMC5	26S proteasome regulatory subunit 8 OS=Homo sapiens OX=9606 GN=PSMC5 PE=1 SV=1	-0.247405	7.71114	-2.22832	0.0349962	0.542398	-3.55224
sp|Q6NUK1|SCMC1_HUMAN	SLC25A24	Calcium-binding mitochondrial carrier protein SCaMC-1 OS=Homo sapiens OX=9606 GN=SLC25A24 PE=1 SV=2	-0.452515	8.14388	-2.22539	0.0352162	0.542398	-3.55672
sp|Q6PHR2|ULK3_HUMAN	ULK3	Serine/threonine-protein kinase ULK3 OS=Homo sapiens OX=9606 GN=ULK3 PE=1 SV=2	-0.366704	7.48397	-2.23982	0.0359212	0.542398	-3.55826
sp|P05186|PPBT_HUMAN	ALPL	Alkaline phosphatase, tissue-nonspecific isozyme OS=Homo sapiens OX=9606 GN=ALPL PE=1 SV=4	-0.460145	7.91454	-2.22284	0.0354093	0.542398	-3.56062
sp|Q16581|C3AR_HUMAN	C3AR1	C3a anaphylatoxin chemotactic receptor OS=Homo sapiens OX=9606 GN=C3AR1 PE=1 SV=2	-0.742862	6.32994	-2.23733	0.0361072	0.542398	-3.56174
tr|H7BYR8|H7BYR8_HUMAN	MBP	Myelin basic protein OS=Homo sapiens OX=9606 GN=MBP PE=1 SV=1	0.691379	10.2679	2.21739	0.0358234	0.542398	-3.56892
sp|P19075|TSN8_HUMAN	TSPAN8	Tetraspanin-8 OS=Homo sapiens OX=9606 GN=TSPAN8 PE=1 SV=1	0.622748	11.8101	2.21935	0.0360673	0.542398	-3.56912
sp|Q9NPJ3|ACO13_HUMAN	ACOT13	Acyl-coenzyme A thioesterase 13 OS=Homo sapiens OX=9606 GN=ACOT13 PE=1 SV=1	0.603436	8.59286	2.22617	0.0364414	0.542398	-3.56918
tr|A0A0A0MS29|A0A0A0MS29_HUMAN	MFF	Mitochondrial fission factor OS=Homo sapiens OX=9606 GN=MFF PE=1 SV=1	0.473064	7.01152	2.21696	0.0358568	0.542398	-3.56959
sp|O76082|OCTN2_HUMAN	SLC22A5	Organic cation/carnitine transporter 2 OS=Homo sapiens OX=9606 GN=SLC22A5 PE=1 SV=1	-0.430189	6.97379	-2.21783	0.0361843	0.542398	-3.57141
sp|O14735|CDIPT_HUMAN	CDIPT	CDP-diacylglycerol--inositol 3-phosphatidyltransferase OS=Homo sapiens OX=9606 GN=CDIPT PE=1 SV=1	-0.443787	8.74709	-2.2165	0.0362864	0.542398	-3.5734
sp|P20851|C4BPB_HUMAN	C4BPB	C4b-binding protein beta chain OS=Homo sapiens OX=9606 GN=C4BPB PE=1 SV=1	-0.653046	7.13231	-2.20881	0.0364849	0.542398	-3.58198
sp|P36776|LONM_HUMAN	LONP1	Lon protease homolog, mitochondrial OS=Homo sapiens OX=9606 GN=LONP1 PE=1 SV=2	0.388846	7.34865	2.20867	0.0364963	0.542398	-3.5822
sp|P20916|MAG_HUMAN	MAG	Myelin-associated glycoprotein OS=Homo sapiens OX=9606 GN=MAG PE=1 SV=1	0.494013	8.47368	2.20845	0.0365129	0.542398	-3.58253
sp|Q9UBQ5|EIF3K_HUMAN	EIF3K	Eukaryotic translation initiation factor 3 subunit K OS=Homo sapiens OX=9606 GN=EIF3K PE=1 SV=1	-0.385802	9.28025	-2.20923	0.0368491	0.542398	-3.58427
sp|P42677|RS27_HUMAN	RPS27	40S ribosomal protein S27 OS=Homo sapiens OX=9606 GN=RPS27 PE=1 SV=3	-0.422498	8.84783	-2.20628	0.0366824	0.542398	-3.58583
sp|O43592|XPOT_HUMAN	XPOT	Exportin-T OS=Homo sapiens OX=9606 GN=XPOT PE=1 SV=2	0.537542	7.03358	2.21867	0.0375313	0.543295	-3.58641
sp|P46777|RL5_HUMAN	RPL5	60S ribosomal protein L5 OS=Homo sapiens OX=9606 GN=RPL5 PE=1 SV=3	-0.392813	6.89733	-2.20507	0.036777	0.542398	-3.58767
sp|P62820|RAB1A_HUMAN	RAB1A	Ras-related protein Rab-1A OS=Homo sapiens OX=9606 GN=RAB1A PE=1 SV=3	-0.483911	9.01209	-2.20133	0.0370708	0.543295	-3.59334
sp|Q16653|MOG_HUMAN	MOG	Myelin-oligodendrocyte glycoprotein OS=Homo sapiens OX=9606 GN=MOG PE=1 SV=2	0.494953	9.87489	2.19669	0.0374387	0.543295	-3.60038
sp|P60763|RAC3_HUMAN	RAC3	Ras-related C3 botulinum toxin substrate 3 OS=Homo sapiens OX=9606 GN=RAC3 PE=1 SV=1	0.469939	8.54784	2.19522	0.0375554	0.543295	-3.6026
sp|Q13613|MTMR1_HUMAN	MTMR1	Myotubularin-related protein 1 OS=Homo sapiens OX=9606 GN=MTMR1 PE=1 SV=4	-0.319076	7.29115	-2.19499	0.0375739	0.543295	-3.60295
sp|P42704|LPPRC_HUMAN	LRPPRC	Leucine-rich PPR motif-containing protein, mitochondrial OS=Homo sapiens OX=9606 GN=LRPPRC PE=1 SV=3	0.344138	7.75258	2.19256	0.0377685	0.544185	-3.60663
sp|P11215|ITAM_HUMAN	ITGAM	Integrin alpha-M OS=Homo sapiens OX=9606 GN=ITGAM PE=1 SV=2	-0.418827	8.02605	-2.18909	0.038048	0.546289	-3.61189
sp|Q13308|PTK7_HUMAN	PTK7	Inactive tyrosine-protein kinase 7 OS=Homo sapiens OX=9606 GN=PTK7 PE=1 SV=2	-0.497224	6.80796	-2.19191	0.0386604	0.549478	-3.61369
sp|P08069|IGF1R_HUMAN	IGF1R	Insulin-like growth factor 1 receptor OS=Homo sapiens OX=9606 GN=IGF1R PE=1 SV=1	-0.358731	6.54418	-2.18636	0.0382684	0.547533	-3.616
sp|P01714|LV319_HUMAN	IGLV3-19	Immunoglobulin lambda variable 3-19 OS=Homo sapiens OX=9606 GN=IGLV3-19 PE=1 SV=2	-0.558989	7.19777	-2.24345	0.0391475	0.550486	-3.61851
sp|Q15366|PCBP2_HUMAN	PCBP2	Poly(rC)-binding protein 2 OS=Homo sapiens OX=9606 GN=PCBP2 PE=1 SV=1	0.24334	8.32656	2.18104	0.0387026	0.549478	-3.62404
sp|O14495|PLPP3_HUMAN	PLPP3	Phospholipid phosphatase 3 OS=Homo sapiens OX=9606 GN=PLPP3 PE=1 SV=1	-0.38411	7.96709	-2.17858	0.0389051	0.549478	-3.62775
sp|P42330|AK1C3_HUMAN	AKR1C3	Aldo-keto reductase family 1 member C3 OS=Homo sapiens OX=9606 GN=AKR1C3 PE=1 SV=4	-0.442409	7.88069	-2.17814	0.0389415	0.549478	-3.62842
sp|Q13637|RAB32_HUMAN	RAB32	Ras-related protein Rab-32 OS=Homo sapiens OX=9606 GN=RAB32 PE=1 SV=3	-0.415997	6.73412	-2.16927	0.0396785	0.554148	-3.64176
sp|Q9NYU2|UGGG1_HUMAN	UGGT1	UDP-glucose:glycoprotein glucosyltransferase 1 OS=Homo sapiens OX=9606 GN=UGGT1 PE=1 SV=3	0.23481	7.25165	2.16804	0.039782	0.554148	-3.64361
sp|P10301|RRAS_HUMAN	RRAS	Ras-related protein R-Ras OS=Homo sapiens OX=9606 GN=RRAS PE=1 SV=1	-0.404677	8.22317	-2.16766	0.0398142	0.554148	-3.64419
sp|O75477|ERLN1_HUMAN	ERLIN1	Erlin-1 OS=Homo sapiens OX=9606 GN=ERLIN1 PE=1 SV=2	-0.452975	7.01938	-2.16229	0.0402679	0.557959	-3.65225
sp|P62841|RS15_HUMAN	RPS15	40S ribosomal protein S15 OS=Homo sapiens OX=9606 GN=RPS15 PE=1 SV=2	-0.384959	7.06951	-2.1612	0.0403606	0.557959	-3.65388
sp|P04439|HLAA_HUMAN	HLA-A	HLA class I histocompatibility antigen, A alpha chain OS=Homo sapiens OX=9606 GN=HLA-A PE=1 SV=2	-0.41953	8.58459	-2.15887	0.0405597	0.558746	-3.65738
sp|P53602|MVD1_HUMAN	MVD	Diphosphomevalonate decarboxylase OS=Homo sapiens OX=9606 GN=MVD PE=1 SV=1	0.44437	7.66961	2.18924	0.0418143	0.561854	-3.65747
sp|P98196|AT11A_HUMAN	ATP11A	Phospholipid-transporting ATPase IH OS=Homo sapiens OX=9606 GN=ATP11A PE=1 SV=3	-0.250927	6.75806	-2.15734	0.0406907	0.558746	-3.65967
sp|Q9Y484|WIPI4_HUMAN	WDR45	WD repeat domain phosphoinositide-interacting protein 4 OS=Homo sapiens OX=9606 GN=WDR45 PE=1 SV=1	0.342228	6.77233	2.15535	0.0412744	0.561113	-3.66422
sp|Q96FJ2|DYL2_HUMAN	DYNLL2	Dynein light chain 2, cytoplasmic OS=Homo sapiens OX=9606 GN=DYNLL2 PE=1 SV=1	0.709532	8.29676	2.15318	0.0410489	0.561113	-3.6659
sp|Q9BXJ8|TACAN_HUMAN	TMEM120A	Ion channel TACAN OS=Homo sapiens OX=9606 GN=TMEM120A PE=1 SV=1	-0.37481	7.02367	-2.1517	0.041177	0.561113	-3.66811
sp|Q9H0U3|MAGT1_HUMAN	MAGT1	Magnesium transporter protein 1 OS=Homo sapiens OX=9606 GN=MAGT1 PE=1 SV=1	-0.428284	7.75442	-2.15128	0.041627	0.561854	-3.67021
sp|Q9H2H9|S38A1_HUMAN	SLC38A1	Sodium-coupled neutral amino acid symporter 1 OS=Homo sapiens OX=9606 GN=SLC38A1 PE=1 SV=1	-0.482787	8.78223	-2.15043	0.0417011	0.561854	-3.67146
sp|Q9UHY7|ENOPH_HUMAN	ENOPH1	Enolase-phosphatase E1 OS=Homo sapiens OX=9606 GN=ENOPH1 PE=1 SV=1	0.607375	8.20004	2.14367	0.0418782	0.561854	-3.68011
sp|O15069|NACAD_HUMAN	NACAD	NAC-alpha domain-containing protein 1 OS=Homo sapiens OX=9606 GN=NACAD PE=1 SV=3	0.368643	6.91497	2.14505	0.0426257	0.565422	-3.68142
sp|P15151|PVR_HUMAN	PVR	Poliovirus receptor OS=Homo sapiens OX=9606 GN=PVR PE=1 SV=2	-0.414096	7.63022	-2.13987	0.0422138	0.564506	-3.68577
sp|A6NDG6|PGP_HUMAN	PGP	Glycerol-3-phosphate phosphatase OS=Homo sapiens OX=9606 GN=PGP PE=1 SV=1	-0.480164	6.54998	-2.14018	0.0430576	0.565422	-3.68843
sp|O94910|AGRL1_HUMAN	ADGRL1	Adhesion G protein-coupled receptor L1 OS=Homo sapiens OX=9606 GN=ADGRL1 PE=1 SV=1	0.295172	7.01352	2.13318	0.0428107	0.565422	-3.69574
sp|P04843|RPN1_HUMAN	RPN1	Dolichyl-diphosphooligosaccharide--protein glycosyltransferase subunit 1 OS=Homo sapiens OX=9606 GN=RPN1 PE=1 SV=1	-0.369237	8.3894	-2.13306	0.042822	0.565422	-3.69593
sp|P55884|EIF3B_HUMAN	EIF3B	Eukaryotic translation initiation factor 3 subunit B OS=Homo sapiens OX=9606 GN=EIF3B PE=1 SV=3	0.27039	7.21499	2.13093	0.0430132	0.565422	-3.69909
sp|P20645|MPRD_HUMAN	M6PR	Cation-dependent mannose-6-phosphate receptor OS=Homo sapiens OX=9606 GN=M6PR PE=1 SV=1	-0.575976	8.40197	-2.13143	0.0433877	0.565422	-3.69933
sp|Q9UQ13|SHOC2_HUMAN	SHOC2	Leucine-rich repeat protein SHOC-2 OS=Homo sapiens OX=9606 GN=SHOC2 PE=1 SV=2	0.460447	6.37294	2.13154	0.0438349	0.566827	-3.70084
sp|Q16643|DREB_HUMAN	DBN1	Drebrin OS=Homo sapiens OX=9606 GN=DBN1 PE=1 SV=4	0.453293	6.80967	2.12923	0.043167	0.565422	-3.70162
sp|Q9P016|THYN1_HUMAN	THYN1	Thymocyte nuclear protein 1 OS=Homo sapiens OX=9606 GN=THYN1 PE=1 SV=1	-0.327849	6.95208	-2.1307	0.0439111	0.566827	-3.70245
sp|O43866|CD5L_HUMAN	CD5L	CD5 antigen-like OS=Homo sapiens OX=9606 GN=CD5L PE=1 SV=1	-0.523564	7.14715	-2.1273	0.0442209	0.567474	-3.70693
sp|Q12905|ILF2_HUMAN	ILF2	Interleukin enhancer-binding factor 2 OS=Homo sapiens OX=9606 GN=ILF2 PE=1 SV=2	0.457839	6.79258	2.12287	0.0437455	0.566827	-3.71106
sp|Q9HAV7|GRPE1_HUMAN	GRPEL1	GrpE protein homolog 1, mitochondrial OS=Homo sapiens OX=9606 GN=GRPEL1 PE=1 SV=2	0.504402	6.75894	2.11751	0.0442386	0.567474	-3.719
sp|Q9HCE6|ARGAL_HUMAN	ARHGEF10L	Rho guanine nucleotide exchange factor 10-like protein OS=Homo sapiens OX=9606 GN=ARHGEF10L PE=1 SV=4	-0.56042	6.63104	-2.14082	0.0460374	0.572599	-3.71909
sp|P55809|SCOT1_HUMAN	OXCT1	Succinyl-CoA:3-ketoacid coenzyme A transferase 1, mitochondrial OS=Homo sapiens OX=9606 GN=OXCT1 PE=1 SV=1	0.339269	7.96304	2.11471	0.0444984	0.568305	-3.72315
sp|O15068|MCF2L_HUMAN	MCF2L	Guanine nucleotide exchange factor DBS OS=Homo sapiens OX=9606 GN=MCF2L PE=1 SV=2	0.434325	6.62266	2.11611	0.0452535	0.571534	-3.72338
sp|O43505|B4GA1_HUMAN	B4GAT1	Beta-1,4-glucuronyltransferase 1 OS=Homo sapiens OX=9606 GN=B4GAT1 PE=1 SV=1	-0.338588	7.77285	-2.11382	0.0445811	0.568305	-3.72446
sp|Q9Y296|TPPC4_HUMAN	TRAPPC4	Trafficking protein particle complex subunit 4 OS=Homo sapiens OX=9606 GN=TRAPPC4 PE=1 SV=1	-0.713874	6.6726	-2.25422	0.0432572	0.565422	-3.72474
sp|Q96K19|RN170_HUMAN	RNF170	E3 ubiquitin-protein ligase RNF170 OS=Homo sapiens OX=9606 GN=RNF170 PE=1 SV=2	-0.425518	6.93698	-2.11168	0.0447803	0.569072	-3.72762
sp|P15559|NQO1_HUMAN	NQO1	NAD(P)H dehydrogenase [quinone] 1 OS=Homo sapiens OX=9606 GN=NQO1 PE=1 SV=1	-0.617214	7.59461	-2.1079	0.0451349	0.571534	-3.73321
sp|Q53GS9|SNUT2_HUMAN	USP39	U4/U6.U5 tri-snRNP-associated protein 2 OS=Homo sapiens OX=9606 GN=USP39 PE=1 SV=2	0.402652	6.31895	2.10721	0.0456272	0.572174	-3.73464
sp|Q8WUD6|CHPT1_HUMAN	CHPT1	Cholinephosphotransferase 1 OS=Homo sapiens OX=9606 GN=CHPT1 PE=1 SV=1	-0.509534	8.80565	-2.1146	0.0470603	0.575323	-3.73643
sp|P31321|KAP1_HUMAN	PRKAR1B	cAMP-dependent protein kinase type I-beta regulatory subunit OS=Homo sapiens OX=9606 GN=PRKAR1B PE=1 SV=4	0.352144	7.11798	2.10471	0.0458634	0.572174	-3.73826
sp|O00468|AGRIN_HUMAN	AGRN	Agrin OS=Homo sapiens OX=9606 GN=AGRN PE=1 SV=6	0.248853	7.27238	2.10291	0.0456066	0.572174	-3.74057
sp|P49257|LMAN1_HUMAN	LMAN1	Protein ERGIC-53 OS=Homo sapiens OX=9606 GN=LMAN1 PE=1 SV=2	-0.296811	7.51743	-2.10038	0.0458484	0.572174	-3.74431
sp|Q504Y0|S39AC_HUMAN	SLC39A12	Zinc transporter ZIP12 OS=Homo sapiens OX=9606 GN=SLC39A12 PE=2 SV=3	-0.442975	6.97127	-2.0999	0.046322	0.574393	-3.74524
tr|A0A8I5KX57|A0A8I5KX57_HUMAN	BCAS1	Brain enriched myelin associated protein 1 OS=Homo sapiens OX=9606 GN=BCAS1 PE=1 SV=1	-0.493864	6.96394	-2.14213	0.0467425	0.575323	-3.74553
sp|Q07075|AMPE_HUMAN	ENPEP	Glutamyl aminopeptidase OS=Homo sapiens OX=9606 GN=ENPEP PE=1 SV=3	-0.516362	6.52821	-2.10022	0.0467576	0.575323	-3.74608
sp|P54646|AAPK2_HUMAN	PRKAA2	5'-AMP-activated protein kinase catalytic subunit alpha-2 OS=Homo sapiens OX=9606 GN=PRKAA2 PE=1 SV=2	-0.451493	6.75583	-2.11317	0.0486198	0.58358	-3.75397
sp|O95490|AGRL2_HUMAN	ADGRL2	Adhesion G protein-coupled receptor L2 OS=Homo sapiens OX=9606 GN=ADGRL2 PE=1 SV=2	-0.483958	6.21123	-2.10299	0.0488493	0.58358	-3.75796
sp|P05937|CALB1_HUMAN	CALB1	Calbindin OS=Homo sapiens OX=9606 GN=CALB1 PE=1 SV=2	-0.441795	6.99691	-2.11638	0.0491505	0.58358	-3.75825
sp|Q16348|S15A2_HUMAN	SLC15A2	Solute carrier family 15 member 2 OS=Homo sapiens OX=9606 GN=SLC15A2 PE=1 SV=2	-0.375618	7.92886	-2.08953	0.0468944	0.575323	-3.76027
sp|Q8N4Q0|PTGR3_HUMAN	PTGR3	Prostaglandin reductase 3 OS=Homo sapiens OX=9606 GN=PTGR3 PE=1 SV=1	0.360655	6.76796	2.08742	0.0471	0.575323	-3.76336
sp|Q8TEV9|SMCR8_HUMAN	SMCR8	Guanine nucleotide exchange protein SMCR8 OS=Homo sapiens OX=9606 GN=SMCR8 PE=1 SV=2	-0.422917	6.88045	-2.10675	0.0500798	0.58358	-3.77011
sp|Q03001|DYST_HUMAN	DST	Dystonin OS=Homo sapiens OX=9606 GN=DST PE=1 SV=4	0.214095	6.6674	2.08179	0.0476536	0.580352	-3.77162
sp|Q13277|STX3_HUMAN	STX3	Syntaxin-3 OS=Homo sapiens OX=9606 GN=STX3 PE=1 SV=3	-0.29079	6.66701	-2.08357	0.0494599	0.58358	-3.77402
sp|Q969E4|TCAL3_HUMAN	TCEAL3	Transcription elongation factor A protein-like 3 OS=Homo sapiens OX=9606 GN=TCEAL3 PE=1 SV=1	-0.482732	7.35867	-2.08096	0.0497211	0.58358	-3.77726
sp|Q8IZ81|ELMD2_HUMAN	ELMOD2	ELMO domain-containing protein 2 OS=Homo sapiens OX=9606 GN=ELMOD2 PE=1 SV=1	-0.388496	7.07072	-2.0754	0.0491975	0.58358	-3.78135
sp|Q8IWT6|LRC8A_HUMAN	LRRC8A	Volume-regulated anion channel subunit LRRC8A OS=Homo sapiens OX=9606 GN=LRRC8A PE=1 SV=1	-0.26183	7.43632	-2.06808	0.0490255	0.58358	-3.79166
sp|P62861|RS30_HUMAN	FAU	FAU ubiquitin-like and ribosomal protein S30 OS=Homo sapiens OX=9606 GN=FAU PE=1 SV=2	0.40202	7.15819	2.07208	0.0512426	0.583983	-3.79309
sp|A5YM72|CRNS1_HUMAN	CARNS1	Carnosine synthase 1 OS=Homo sapiens OX=9606 GN=CARNS1 PE=1 SV=3	0.600655	7.37722	2.06613	0.0492229	0.58358	-3.79449
sp|P55060|XPO2_HUMAN	CSE1L	Exportin-2 OS=Homo sapiens OX=9606 GN=CSE1L PE=1 SV=3	-0.242571	7.38598	-2.06391	0.0494488	0.58358	-3.79772
sp|O95352|ATG7_HUMAN	ATG7	Ubiquitin-like modifier-activating enzyme ATG7 OS=Homo sapiens OX=9606 GN=ATG7 PE=1 SV=1	0.21854	7.19663	2.0586	0.0499938	0.58358	-3.80545
sp|Q9UIQ6|LCAP_HUMAN	LNPEP	Leucyl-cystinyl aminopeptidase OS=Homo sapiens OX=9606 GN=LNPEP PE=1 SV=3	-0.281021	7.2655	-2.0585	0.0500049	0.58358	-3.80561
sp|Q00005|2ABB_HUMAN	PPP2R2B	Serine/threonine-protein phosphatase 2A 55 kDa regulatory subunit B beta isoform OS=Homo sapiens OX=9606 GN=PPP2R2B PE=1 SV=1	-0.480107	6.87281	-2.07172	0.0527385	0.595061	-3.80586
sp|O95139|NDUB6_HUMAN	NDUFB6	NADH dehydrogenase [ubiquinone] 1 beta subcomplex subunit 6 OS=Homo sapiens OX=9606 GN=NDUFB6 PE=1 SV=3	-0.503156	8.14791	-2.05775	0.050082	0.58358	-3.8067
sp|Q53TN4|CYBR1_HUMAN	CYBRD1	Plasma membrane ascorbate-dependent reductase CYBRD1 OS=Homo sapiens OX=9606 GN=CYBRD1 PE=1 SV=1	-0.777335	7.92326	-2.05699	0.0501605	0.58358	-3.8078
sp|P53007|TXTP_HUMAN	SLC25A1	Tricarboxylate transport protein, mitochondrial OS=Homo sapiens OX=9606 GN=SLC25A1 PE=1 SV=2	-0.427541	8.38689	-2.05567	0.0502967	0.58358	-3.80971
sp|P23515|OMGP_HUMAN	OMG	Oligodendrocyte-myelin glycoprotein OS=Homo sapiens OX=9606 GN=OMG PE=1 SV=2	0.417522	8.61135	2.05552	0.0503124	0.58358	-3.80993
sp|P54803|GALC_HUMAN	GALC	Galactocerebrosidase OS=Homo sapiens OX=9606 GN=GALC PE=1 SV=3	0.424126	8.39887	2.05333	0.0505405	0.58358	-3.81312
sp|Q92581|SL9A6_HUMAN	SLC9A6	Sodium/hydrogen exchanger 6 OS=Homo sapiens OX=9606 GN=SLC9A6 PE=1 SV=3	-0.326113	7.15664	-2.05303	0.0505709	0.58358	-3.81354
sp|Q969L2|MAL2_HUMAN	MAL2	Protein MAL2 OS=Homo sapiens OX=9606 GN=MAL2 PE=1 SV=1	0.538056	11.1018	2.05248	0.0506283	0.58358	-3.81434
sp|Q9H6V9|LDAH_HUMAN	LDAH	Lipid droplet-associated hydrolase OS=Homo sapiens OX=9606 GN=LDAH PE=1 SV=1	-0.549636	5.88367	-2.04975	0.0513559	0.583983	-3.81737
sp|Q02246|CNTN2_HUMAN	CNTN2	Contactin-2 OS=Homo sapiens OX=9606 GN=CNTN2 PE=1 SV=1	0.409707	7.48129	2.04924	0.0509679	0.583983	-3.81905
sp|Q8N1G4|LRC47_HUMAN	LRRC47	Leucine-rich repeat-containing protein 47 OS=Homo sapiens OX=9606 GN=LRRC47 PE=1 SV=1	0.250897	7.07091	2.0486	0.0510347	0.583983	-3.81998
sp|Q7L099|RUFY3_HUMAN	RUFY3	Protein RUFY3 OS=Homo sapiens OX=9606 GN=RUFY3 PE=1 SV=1	0.231311	8.1098	2.04535	0.0513768	0.583983	-3.82468
sp|Q96AM1|MRGRF_HUMAN	MRGPRF	Mas-related G-protein coupled receptor member F OS=Homo sapiens OX=9606 GN=MRGPRF PE=2 SV=1	-0.623615	8.35912	-2.03721	0.0537019	0.595061	-3.83536
sp|Q9Y3E7|CHMP3_HUMAN	CHMP3	Charged multivesicular body protein 3 OS=Homo sapiens OX=9606 GN=CHMP3 PE=1 SV=3	-0.388996	8.65875	-2.0351	0.0529158	0.595061	-3.83824
sp|O75558|STX11_HUMAN	STX11	Syntaxin-11 OS=Homo sapiens OX=9606 GN=STX11 PE=1 SV=1	-0.831995	6.46709	-2.05928	0.0558734	0.597392	-3.83851
sp|P63220|RS21_HUMAN	RPS21	40S ribosomal protein S21 OS=Homo sapiens OX=9606 GN=RPS21 PE=1 SV=1	-0.493473	8.11354	-2.03047	0.0544345	0.595061	-3.84335
sp|Q9UBI6|GBG12_HUMAN	GNG12	Guanine nucleotide-binding protein G(I)/G(S)/G(O) subunit gamma-12 OS=Homo sapiens OX=9606 GN=GNG12 PE=1 SV=3	-0.423822	9.69096	-2.02822	0.0532148	0.595061	-3.84942
sp|Q8WWZ7|ABCA5_HUMAN	ABCA5	Cholesterol transporter ABCA5 OS=Homo sapiens OX=9606 GN=ABCA5 PE=1 SV=2	0.282401	6.86333	2.02608	0.0534489	0.595061	-3.85251
sp|P50416|CPT1A_HUMAN	CPT1A	Carnitine O-palmitoyltransferase 1, liver isoform OS=Homo sapiens OX=9606 GN=CPT1A PE=1 SV=2	-0.382652	7.97139	-2.02386	0.0536923	0.595061	-3.8557
sp|O76024|WFS1_HUMAN	WFS1	Wolframin OS=Homo sapiens OX=9606 GN=WFS1 PE=1 SV=2	-0.357999	7.8249	-2.02291	0.0537961	0.595061	-3.85706
sp|Q13488|VPP3_HUMAN	TCIRG1	V-type proton ATPase 116 kDa subunit a 3 OS=Homo sapiens OX=9606 GN=TCIRG1 PE=1 SV=3	-0.288713	6.90016	-2.02275	0.053814	0.595061	-3.85729
sp|P39019|RS19_HUMAN	RPS19	40S ribosomal protein S19 OS=Homo sapiens OX=9606 GN=RPS19 PE=1 SV=2	-0.387733	9.13585	-2.02219	0.0538756	0.595061	-3.85809
sp|O00142|KITM_HUMAN	TK2	Thymidine kinase 2, mitochondrial OS=Homo sapiens OX=9606 GN=TK2 PE=1 SV=4	0.408877	7.42218	2.02053	0.0545079	0.595061	-3.85888
sp|P09211|GSTP1_HUMAN	GSTP1	Glutathione S-transferase P OS=Homo sapiens OX=9606 GN=GSTP1 PE=1 SV=2	-0.353305	7.58662	-2.02139	0.0539637	0.595061	-3.85924
sp|Q92692|NECT2_HUMAN	NECTIN2	Nectin-2 OS=Homo sapiens OX=9606 GN=NECTIN2 PE=1 SV=1	-0.345479	7.58653	-2.01987	0.054582	0.595061	-3.85983
tr|A2AAZ0|A2AAZ0_HUMAN	HLA-DQB1	Major histocompatibility complex, class II, DQ beta 1 OS=Homo sapiens OX=9606 GN=HLA-DQB1 PE=1 SV=1	0.786636	7.30894	2.10981	0.0544514	0.595061	-3.86224
sp|Q96A26|F162A_HUMAN	FAM162A	Protein FAM162A OS=Homo sapiens OX=9606 GN=FAM162A PE=1 SV=2	-0.412531	7.75466	-2.01882	0.0542478	0.595061	-3.86293
sp|Q9UGM6|SYWM_HUMAN	WARS2	Tryptophan--tRNA ligase, mitochondrial OS=Homo sapiens OX=9606 GN=WARS2 PE=1 SV=1	0.408402	7.40232	2.01761	0.0548326	0.595159	-3.86302
sp|P23141|EST1_HUMAN	CES1	Liver carboxylesterase 1 OS=Homo sapiens OX=9606 GN=CES1 PE=1 SV=2	-0.664963	6.95843	-2.01888	0.0569428	0.598625	-3.86322
sp|Q08379|GOGA2_HUMAN	GOLGA2	Golgin subfamily A member 2 OS=Homo sapiens OX=9606 GN=GOLGA2 PE=1 SV=3	-0.739812	5.01103	-2.05373	0.0575746	0.598625	-3.86743
sp|Q7Z2K8|GRIN1_HUMAN	GPRIN1	G protein-regulated inducer of neurite outgrowth 1 OS=Homo sapiens OX=9606 GN=GPRIN1 PE=1 SV=2	-0.359516	6.57093	-2.01495	0.0546782	0.595061	-3.86848
sp|Q9UM00|TMCO1_HUMAN	TMCO1	Calcium load-activated calcium channel OS=Homo sapiens OX=9606 GN=TMCO1 PE=1 SV=2	-0.331373	8.40281	-2.01032	0.0556498	0.597392	-3.87331
sp|P02730|B3AT_HUMAN	SLC4A1	Band 3 anion transport protein OS=Homo sapiens OX=9606 GN=SLC4A1 PE=1 SV=3	-0.728775	10.4979	-2.01	0.0552331	0.597392	-3.87557
sp|O75334|LIPA2_HUMAN	PPFIA2	Liprin-alpha-2 OS=Homo sapiens OX=9606 GN=PPFIA2 PE=1 SV=2	-0.438485	6.64061	-2.02752	0.0593451	0.602256	-3.87809
sp|P39687|AN32A_HUMAN	ANP32A	Acidic leucine-rich nuclear phosphoprotein 32 family member A OS=Homo sapiens OX=9606 GN=ANP32A PE=1 SV=1	-0.404859	7.97358	-2.00561	0.0557292	0.597392	-3.88185
sp|O43236|SEPT4_HUMAN	SEPTIN4	Septin-4 OS=Homo sapiens OX=9606 GN=SEPTIN4 PE=1 SV=1	0.302077	7.56745	2.0052	0.0557765	0.597392	-3.88245
sp|Q00013|EM55_HUMAN	MPP1	55 kDa erythrocyte membrane protein OS=Homo sapiens OX=9606 GN=MPP1 PE=1 SV=2	-0.403384	7.52248	-2.00399	0.0559143	0.597392	-3.88418
sp|P67812|SC11A_HUMAN	SEC11A	Signal peptidase complex catalytic subunit SEC11A OS=Homo sapiens OX=9606 GN=SEC11A PE=1 SV=1	-0.429633	7.876	-2.00143	0.0566601	0.598625	-3.88581
sp|P02462|CO4A1_HUMAN	COL4A1	Collagen alpha-1(IV) chain OS=Homo sapiens OX=9606 GN=COL4A1 PE=1 SV=4	-0.408879	7.93565	-1.99854	0.0574869	0.598625	-3.88802
sp|Q9Y230|RUVB2_HUMAN	RUVBL2	RuvB-like 2 OS=Homo sapiens OX=9606 GN=RUVBL2 PE=1 SV=3	-0.249695	8.04101	-2.0011	0.0562434	0.598385	-3.88829
sp|Q9H9H5|MA6D1_HUMAN	MAP6D1	MAP6 domain-containing protein 1 OS=Homo sapiens OX=9606 GN=MAP6D1 PE=1 SV=1	-0.455379	7.01327	-1.99974	0.0563991	0.598385	-3.89023
sp|O14683|P5I11_HUMAN	TP53I11	Tumor protein p53-inducible protein 11 OS=Homo sapiens OX=9606 GN=TP53I11 PE=1 SV=2	-0.777727	7.52468	-1.99934	0.0564459	0.598385	-3.89081
sp|O75912|DGKI_HUMAN	DGKI	Diacylglycerol kinase iota OS=Homo sapiens OX=9606 GN=DGKI PE=1 SV=1	0.415818	8.18199	1.99371	0.0591817	0.602256	-3.89436
sp|Q6PL24|TMED8_HUMAN	TMED8	Protein TMED8 OS=Homo sapiens OX=9606 GN=TMED8 PE=1 SV=1	-0.446346	7.16941	-1.98771	0.0605409	0.605367	-3.90383
sp|Q9BX68|HINT2_HUMAN	HINT2	Adenosine 5'-monophosphoramidase HINT2 OS=Homo sapiens OX=9606 GN=HINT2 PE=1 SV=1	0.426703	7.30286	1.98985	0.0575446	0.598625	-3.90433
sp|Q9BSJ2|GCP2_HUMAN	TUBGCP2	Gamma-tubulin complex component 2 OS=Homo sapiens OX=9606 GN=TUBGCP2 PE=1 SV=2	-0.304717	6.46669	-1.9876	0.0582658	0.598625	-3.90521
sp|Q63HR2|TENS2_HUMAN	TNS2	Tensin-2 OS=Homo sapiens OX=9606 GN=TNS2 PE=1 SV=2	-0.405391	6.85856	-1.98756	0.0582697	0.598625	-3.90526
sp|Q14161|GIT2_HUMAN	GIT2	ARF GTPase-activating protein GIT2 OS=Homo sapiens OX=9606 GN=GIT2 PE=1 SV=2	-0.296714	6.752	-1.98741	0.0582878	0.598625	-3.90548
sp|Q15526|SURF1_HUMAN	SURF1	Surfeit locus protein 1 OS=Homo sapiens OX=9606 GN=SURF1 PE=1 SV=1	-0.453734	7.50436	-1.98671	0.0583703	0.598625	-3.90646
sp|Q9NZZ3|CHMP5_HUMAN	CHMP5	Charged multivesicular body protein 5 OS=Homo sapiens OX=9606 GN=CHMP5 PE=1 SV=1	-0.788348	6.87791	-1.98312	0.0610874	0.605367	-3.90865
sp|Q9NZN4|EHD2_HUMAN	EHD2	EH domain-containing protein 2 OS=Homo sapiens OX=9606 GN=EHD2 PE=1 SV=2	-0.295022	7.67685	-1.98668	0.0579156	0.598625	-3.90883
sp|O00154|BACH_HUMAN	ACOT7	Cytosolic acyl coenzyme A thioester hydrolase OS=Homo sapiens OX=9606 GN=ACOT7 PE=1 SV=3	0.297787	8.48342	1.98601	0.0579948	0.598625	-3.90979
sp|Q8N257|H2B3B_HUMAN	H2BC26	Histone H2B type 3-B OS=Homo sapiens OX=9606 GN=H2BC26 PE=1 SV=3	-0.698422	8.43284	-1.98494	0.0581203	0.598625	-3.9113
sp|P04844|RPN2_HUMAN	RPN2	Dolichyl-diphosphooligosaccharide--protein glycosyltransferase subunit 2 OS=Homo sapiens OX=9606 GN=RPN2 PE=1 SV=3	-0.390792	7.87494	-1.98464	0.0581551	0.598625	-3.91172
sp|P03886|NU1M_HUMAN	MT-ND1	NADH-ubiquinone oxidoreductase chain 1 OS=Homo sapiens OX=9606 GN=MT-ND1 PE=1 SV=1	-0.613348	7.37105	-1.98272	0.0626649	0.607642	-3.91545
sp|Q8IY17|PLPL6_HUMAN	PNPLA6	Patatin-like phospholipase domain-containing protein 6 OS=Homo sapiens OX=9606 GN=PNPLA6 PE=1 SV=3	-0.296029	7.11208	-1.97737	0.0590178	0.602256	-3.92203
sp|Q8N183|NDUF2_HUMAN	NDUFAF2	NADH dehydrogenase [ubiquinone] 1 alpha subcomplex assembly factor 2 OS=Homo sapiens OX=9606 GN=NDUFAF2 PE=1 SV=1	-0.427402	5.93147	-1.97149	0.0618337	0.606771	-3.9237
sp|Q9NX14|NDUBB_HUMAN	NDUFB11	NADH dehydrogenase [ubiquinone] 1 beta subcomplex subunit 11, mitochondrial OS=Homo sapiens OX=9606 GN=NDUFB11 PE=1 SV=1	0.613913	7.06359	1.97607	0.0591735	0.602256	-3.92387
sp|O14490|DLGP1_HUMAN	DLGAP1	Disks large-associated protein 1 OS=Homo sapiens OX=9606 GN=DLGAP1 PE=1 SV=1	0.390175	6.54621	1.97497	0.0636045	0.608107	-3.92517
sp|Q14696|MESD_HUMAN	MESD	LRP chaperone MESD OS=Homo sapiens OX=9606 GN=MESD PE=1 SV=2	0.367367	6.67595	2.00288	0.0646059	0.611962	-3.92745
sp|Q9BPX5|ARP5L_HUMAN	ARPC5L	Actin-related protein 2/3 complex subunit 5-like protein OS=Homo sapiens OX=9606 GN=ARPC5L PE=1 SV=1	0.311275	7.96976	1.97291	0.0595525	0.602256	-3.92834
sp|P61247|RS3A_HUMAN	RPS3A	40S ribosomal protein S3a OS=Homo sapiens OX=9606 GN=RPS3A PE=1 SV=2	-0.232123	7.75383	-1.972	0.0596619	0.602256	-3.92962
sp|P13637|AT1A3_HUMAN	ATP1A3	Sodium/potassium-transporting ATPase subunit alpha-3 OS=Homo sapiens OX=9606 GN=ATP1A3 PE=1 SV=3	0.24389	10.7838	1.97123	0.0597547	0.602256	-3.93071
sp|P20472|PRVA_HUMAN	PVALB	Parvalbumin alpha OS=Homo sapiens OX=9606 GN=PVALB PE=1 SV=2	-0.53085	6.49471	-1.98521	0.0642749	0.610239	-3.93205
sp|P62753|RS6_HUMAN	RPS6	40S ribosomal protein S6 OS=Homo sapiens OX=9606 GN=RPS6 PE=1 SV=1	-0.242067	7.90289	-1.96971	0.0599393	0.602633	-3.93287
tr|A0A0S2Z3B2|A0A0S2Z3B2_HUMAN	DMD	Dystrophin OS=Homo sapiens OX=9606 GN=DMD PE=1 SV=1	-0.511193	6.08561	-1.96333	0.0622316	0.606957	-3.93561
sp|Q01814|AT2B2_HUMAN	ATP2B2	Plasma membrane calcium-transporting ATPase 2 OS=Homo sapiens OX=9606 GN=ATP2B2 PE=1 SV=2	0.246781	9.1777	1.96694	0.0602752	0.604525	-3.93677
sp|P35754|GLRX1_HUMAN	GLRX	Glutaredoxin-1 OS=Homo sapiens OX=9606 GN=GLRX PE=1 SV=2	0.510605	6.65901	1.96334	0.0611777	0.605367	-3.93901
sp|P05230|FGF1_HUMAN	FGF1	Fibroblast growth factor 1 OS=Homo sapiens OX=9606 GN=FGF1 PE=1 SV=1	0.437425	9.04194	1.96278	0.0612468	0.605367	-3.93979
sp|P25189|MYP0_HUMAN	MPZ	Myelin protein P0 OS=Homo sapiens OX=9606 GN=MPZ PE=1 SV=1	0.866936	8.39368	1.96213	0.065188	0.614163	-3.94044
sp|Q96EY1|DNJA3_HUMAN	DNAJA3	DnaJ homolog subfamily A member 3, mitochondrial OS=Homo sapiens OX=9606 GN=DNAJA3 PE=1 SV=2	0.416122	7.20753	1.96282	0.0607779	0.605367	-3.94258
sp|B9A064|IGLL5_HUMAN	IGLL5	Immunoglobulin lambda-like polypeptide 5 OS=Homo sapiens OX=9606 GN=IGLL5 PE=2 SV=2	-0.561767	7.65156	-1.9612	0.060977	0.605367	-3.94486
sp|O75208|COQ9_HUMAN	COQ9	Ubiquinone biosynthesis protein COQ9, mitochondrial OS=Homo sapiens OX=9606 GN=COQ9 PE=1 SV=1	0.491279	7.06156	1.95495	0.0638755	0.609274	-3.9454
sp|P62495|ERF1_HUMAN	ETF1	Eukaryotic peptide chain release factor subunit 1 OS=Homo sapiens OX=9606 GN=ETF1 PE=1 SV=3	0.2128	6.9962	1.95582	0.0616407	0.606438	-3.95242
sp|Q9H444|CHM4B_HUMAN	CHMP4B	Charged multivesicular body protein 4b OS=Homo sapiens OX=9606 GN=CHMP4B PE=1 SV=1	-0.33601	8.59429	-1.95573	0.0616515	0.606438	-3.95255
sp|Q96Q42|ALS2_HUMAN	ALS2	Alsin OS=Homo sapiens OX=9606 GN=ALS2 PE=1 SV=2	-0.301992	6.79204	-1.95309	0.062446	0.606957	-3.95321
sp|P04733|MT1F_HUMAN	MT1F	Metallothionein-1F OS=Homo sapiens OX=9606 GN=MT1F PE=1 SV=1	-0.959522	5.55253	-1.96007	0.0673767	0.61679	-3.95354
sp|Q96B54|ZN428_HUMAN	ZNF428	Zinc finger protein 428 OS=Homo sapiens OX=9606 GN=ZNF428 PE=1 SV=2	-0.379313	6.3107	-1.94659	0.0663336	0.61453	-3.95727
sp|Q99829|CPNE1_HUMAN	CPNE1	Copine-1 OS=Homo sapiens OX=9606 GN=CPNE1 PE=1 SV=1	-0.398973	7.81986	-1.9498	0.0623912	0.606957	-3.96087
sp|O95294|RASL1_HUMAN	RASAL1	RasGAP-activating-like protein 1 OS=Homo sapiens OX=9606 GN=RASAL1 PE=1 SV=3	-0.394184	7.06988	-1.94946	0.0624344	0.606957	-3.96135
sp|O14521|DHSD_HUMAN	SDHD	Succinate dehydrogenase [ubiquinone] cytochrome b small subunit, mitochondrial OS=Homo sapiens OX=9606 GN=SDHD PE=1 SV=1	-0.46711	7.78916	-1.94484	0.063484	0.608107	-3.96461
sp|O00182|LEG9_HUMAN	LGALS9	Galectin-9 OS=Homo sapiens OX=9606 GN=LGALS9 PE=1 SV=2	0.308769	7.31768	1.94545	0.0629394	0.608107	-3.96698
sp|P61086|UBE2K_HUMAN	UBE2K	Ubiquitin-conjugating enzyme E2 K OS=Homo sapiens OX=9606 GN=UBE2K PE=1 SV=3	0.334292	7.62893	1.94301	0.0632481	0.608107	-3.97039
sp|Q8N697|S15A4_HUMAN	SLC15A4	Solute carrier family 15 member 4 OS=Homo sapiens OX=9606 GN=SLC15A4 PE=1 SV=1	-0.553876	7.96888	-1.94053	0.0640313	0.609339	-3.97053
sp|Q9BRG1|VPS25_HUMAN	VPS25	Vacuolar protein-sorting-associated protein 25 OS=Homo sapiens OX=9606 GN=VPS25 PE=1 SV=1	-0.368628	7.44163	-1.9427	0.0632874	0.608107	-3.97082
sp|Q16774|KGUA_HUMAN	GUK1	Guanylate kinase OS=Homo sapiens OX=9606 GN=GUK1 PE=1 SV=2	0.25179	7.75079	1.94179	0.0634034	0.608107	-3.9721
sp|P52569|CTR2_HUMAN	SLC7A2	Cationic amino acid transporter 2 OS=Homo sapiens OX=9606 GN=SLC7A2 PE=1 SV=2	-0.424977	7.20298	-1.92302	0.0673743	0.61679	-3.98933
sp|Q9HAD4|WDR41_HUMAN	WDR41	WD repeat-containing protein 41 OS=Homo sapiens OX=9606 GN=WDR41 PE=1 SV=3	-0.302607	7.53913	-1.92556	0.0659685	0.61453	-3.9911
sp|O00505|IMA4_HUMAN	KPNA3	Importin subunit alpha-4 OS=Homo sapiens OX=9606 GN=KPNA3 PE=1 SV=2	0.289123	6.87709	1.92802	0.0651749	0.614163	-3.9913
sp|Q6P1A2|MBOA5_HUMAN	LPCAT3	Lysophospholipid acyltransferase 5 OS=Homo sapiens OX=9606 GN=LPCAT3 PE=1 SV=1	-0.380726	8.1198	-1.92207	0.0712821	0.628115	-3.9922
sp|P04003|C4BPA_HUMAN	C4BPA	C4b-binding protein alpha chain OS=Homo sapiens OX=9606 GN=C4BPA PE=1 SV=2	-0.718486	8.57565	-1.92696	0.0653136	0.614163	-3.99278
sp|P02774|VTDB_HUMAN	GC	Vitamin D-binding protein OS=Homo sapiens OX=9606 GN=GC PE=1 SV=2	-0.378062	6.83063	-1.92007	0.0715494	0.628115	-3.99453
sp|P63162|RSMN_HUMAN	SNRPN	Small nuclear ribonucleoprotein-associated protein N OS=Homo sapiens OX=9606 GN=SNRPN PE=1 SV=1	0.29256	7.07611	1.92543	0.0655135	0.614163	-3.99491
sp|P21589|5NTD_HUMAN	NT5E	5'-nucleotidase OS=Homo sapiens OX=9606 GN=NT5E PE=1 SV=1	-0.353269	8.54093	-1.92485	0.0655888	0.614163	-3.9957
sp|P11717|MPRI_HUMAN	IGF2R	Cation-independent mannose-6-phosphate receptor OS=Homo sapiens OX=9606 GN=IGF2R PE=1 SV=3	-0.237504	7.25018	-1.92188	0.0659792	0.61453	-3.99984
sp|Q9NZG7|NINJ2_HUMAN	NINJ2	Ninjurin-2 OS=Homo sapiens OX=9606 GN=NINJ2 PE=1 SV=1	0.459841	7.58243	1.91946	0.0662984	0.61453	-4.00319
sp|Q9Y6M5|ZNT1_HUMAN	SLC30A1	Proton-coupled zinc antiporter SLC30A1 OS=Homo sapiens OX=9606 GN=SLC30A1 PE=1 SV=3	-0.313981	7.63308	-1.91885	0.0663789	0.61453	-4.00404
sp|Q15005|SPCS2_HUMAN	SPCS2	Signal peptidase complex subunit 2 OS=Homo sapiens OX=9606 GN=SPCS2 PE=1 SV=3	-0.363967	8.23118	-1.91758	0.0665472	0.614698	-4.0058
sp|O60503|ADCY9_HUMAN	ADCY9	Adenylate cyclase type 9 OS=Homo sapiens OX=9606 GN=ADCY9 PE=1 SV=4	-0.236544	6.87587	-1.91341	0.0675774	0.616798	-4.00771
sp|P02751|FINC_HUMAN	FN1	Fibronectin OS=Homo sapiens OX=9606 GN=FN1 PE=1 SV=5	-0.278136	6.72057	-1.91499	0.0668919	0.615577	-4.00939
sp|P49758|RGS6_HUMAN	RGS6	Regulator of G-protein signaling 6 OS=Homo sapiens OX=9606 GN=RGS6 PE=1 SV=5	0.234896	7.36278	1.9146	0.0669433	0.615577	-4.00992
sp|Q96TC7|RMD3_HUMAN	RMDN3	Regulator of microtubule dynamics protein 3 OS=Homo sapiens OX=9606 GN=RMDN3 PE=1 SV=2	0.382572	7.37203	1.90911	0.067679	0.616798	-4.01752
sp|P26885|FKBP2_HUMAN	FKBP2	Peptidyl-prolyl cis-trans isomerase FKBP2 OS=Homo sapiens OX=9606 GN=FKBP2 PE=1 SV=2	0.616332	7.55587	1.90702	0.0679607	0.61799	-4.02041
sp|Q9BQ24|ZFY21_HUMAN	ZFYVE21	Zinc finger FYVE domain-containing protein 21 OS=Homo sapiens OX=9606 GN=ZFYVE21 PE=1 SV=1	0.429375	6.30908	1.89512	0.0717686	0.628115	-4.02297
sp|P35222|CTNB1_HUMAN	CTNNB1	Catenin beta-1 OS=Homo sapiens OX=9606 GN=CTNNB1 PE=1 SV=1	0.239905	7.44148	1.90446	0.0683076	0.619766	-4.02394
sp|Q7LBR1|CHM1B_HUMAN	CHMP1B	Charged multivesicular body protein 1b OS=Homo sapiens OX=9606 GN=CHMP1B PE=1 SV=1	-0.34487	7.89827	-1.90334	0.0684598	0.619773	-4.02549
sp|Q9BXM9|FSD1L_HUMAN	FSD1L	FSD1-like protein OS=Homo sapiens OX=9606 GN=FSD1L PE=1 SV=2	0.414335	7.21136	1.89225	0.0721683	0.628115	-4.02773
sp|Q96DE0|NUD16_HUMAN	NUDT16	U8 snoRNA-decapping enzyme OS=Homo sapiens OX=9606 GN=NUDT16 PE=1 SV=2	0.468751	6.81006	1.89506	0.0700719	0.628115	-4.03265
sp|P27169|PON1_HUMAN	PON1	Serum paraoxonase/arylesterase 1 OS=Homo sapiens OX=9606 GN=PON1 PE=1 SV=3	0.683481	7.39351	1.88998	0.0767438	0.641744	-4.03308
sp|Q5T440|CAF17_HUMAN	IBA57	Putative transferase CAF17, mitochondrial OS=Homo sapiens OX=9606 GN=IBA57 PE=1 SV=1	0.419387	7.12609	1.89719	0.069301	0.626004	-4.03397
sp|P55209|NP1L1_HUMAN	NAP1L1	Nucleosome assembly protein 1-like 1 OS=Homo sapiens OX=9606 GN=NAP1L1 PE=1 SV=1	0.467366	6.85844	1.89373	0.0697777	0.628115	-4.03872
sp|Q9HD42|CHM1A_HUMAN	CHMP1A	Charged multivesicular body protein 1a OS=Homo sapiens OX=9606 GN=CHMP1A PE=1 SV=1	-0.288292	8.12343	-1.88985	0.0707951	0.628115	-4.0397
sp|Q9UBS4|DJB11_HUMAN	DNAJB11	DnaJ homolog subfamily B member 11 OS=Homo sapiens OX=9606 GN=DNAJB11 PE=1 SV=1	-0.335227	7.20629	-1.88965	0.0708218	0.628115	-4.03996
sp|P09543|CN37_HUMAN	CNP	2',3'-cyclic-nucleotide 3'-phosphodiesterase OS=Homo sapiens OX=9606 GN=CNP PE=1 SV=2	0.368271	11.6395	1.89185	0.0700381	0.628115	-4.0413
sp|P62072|TIM10_HUMAN	TIMM10	Mitochondrial import inner membrane translocase subunit Tim10 OS=Homo sapiens OX=9606 GN=TIMM10 PE=1 SV=1	-0.368373	8.32364	-1.88798	0.0710558	0.628115	-4.04223
sp|O75787|RENR_HUMAN	ATP6AP2	Renin receptor OS=Homo sapiens OX=9606 GN=ATP6AP2 PE=1 SV=2	-0.386824	8.64722	-1.88503	0.0709893	0.628115	-4.05066
sp|O00555|CAC1A_HUMAN	CACNA1A	Voltage-dependent P/Q-type calcium channel subunit alpha-1A OS=Homo sapiens OX=9606 GN=CACNA1A PE=1 SV=3	0.55084	7.05958	1.87641	0.0798816	0.649852	-4.05317
sp|Q8N468|MFD4A_HUMAN	MFSD4A	Major facilitator superfamily domain-containing protein 4A OS=Homo sapiens OX=9606 GN=MFSD4A PE=2 SV=3	-0.622186	7.85371	-1.87644	0.0732088	0.62935	-4.05419
sp|P83731|RL24_HUMAN	RPL24	60S ribosomal protein L24 OS=Homo sapiens OX=9606 GN=RPL24 PE=1 SV=1	-0.302987	7.83742	-1.8823	0.0713732	0.628115	-4.05439
sp|P10768|ESTD_HUMAN	ESD	S-formylglutathione hydrolase OS=Homo sapiens OX=9606 GN=ESD PE=1 SV=2	-0.378197	8.33513	-1.87969	0.0717415	0.628115	-4.05796
sp|P23229|ITA6_HUMAN	ITGA6	Integrin alpha-6 OS=Homo sapiens OX=9606 GN=ITGA6 PE=1 SV=5	-0.258662	7.67885	-1.87964	0.0717494	0.628115	-4.05803
sp|Q08357|S20A2_HUMAN	SLC20A2	Sodium-dependent phosphate transporter 2 OS=Homo sapiens OX=9606 GN=SLC20A2 PE=1 SV=1	-0.336773	7.91721	-1.8757	0.07279	0.628115	-4.05878
sp|Q8N9F7|GDPD1_HUMAN	GDPD1	Lysophospholipase D GDPD1 OS=Homo sapiens OX=9606 GN=GDPD1 PE=1 SV=2	-0.291157	6.91613	-1.87823	0.0719485	0.628115	-4.05995
sp|O43761|SNG3_HUMAN	SYNGR3	Synaptogyrin-3 OS=Homo sapiens OX=9606 GN=SYNGR3 PE=1 SV=2	-0.530175	11.5113	-1.87749	0.0720543	0.628115	-4.06097
sp|Q9UHV9|PFD2_HUMAN	PFDN2	Prefoldin subunit 2 OS=Homo sapiens OX=9606 GN=PFDN2 PE=1 SV=1	0.408419	7.74843	1.87646	0.0722011	0.628115	-4.06238
sp|Q9NPA0|EMC7_HUMAN	EMC7	ER membrane protein complex subunit 7 OS=Homo sapiens OX=9606 GN=EMC7 PE=1 SV=1	-0.386765	6.94887	-1.87572	0.0723065	0.628115	-4.06339
sp|P09525|ANXA4_HUMAN	ANXA4	Annexin A4 OS=Homo sapiens OX=9606 GN=ANXA4 PE=1 SV=4	-0.411127	8.39151	-1.87388	0.072569	0.628115	-4.0659
sp|P39656|OST48_HUMAN	DDOST	Dolichyl-diphosphooligosaccharide--protein glycosyltransferase 48 kDa subunit OS=Homo sapiens OX=9606 GN=DDOST PE=1 SV=4	-0.422318	8.23804	-1.87232	0.0727923	0.628115	-4.06802
sp|O76062|ERG24_HUMAN	TM7SF2	Delta(14)-sterol reductase TM7SF2 OS=Homo sapiens OX=9606 GN=TM7SF2 PE=1 SV=3	-0.569451	8.53352	-1.86873	0.0737911	0.630382	-4.06814
sp|Q9P2X3|IMPCT_HUMAN	IMPACT	Protein IMPACT OS=Homo sapiens OX=9606 GN=IMPACT PE=1 SV=2	-0.364478	7.06621	-1.85593	0.078846	0.646569	-4.06871
sp|Q92896|GSLG1_HUMAN	GLG1	Golgi apparatus protein 1 OS=Homo sapiens OX=9606 GN=GLG1 PE=1 SV=2	-0.31303	7.66619	-1.87149	0.0729116	0.628115	-4.06916
sp|P98172|EFNB1_HUMAN	EFNB1	Ephrin-B1 OS=Homo sapiens OX=9606 GN=EFNB1 PE=1 SV=1	0.516566	6.19132	1.87602	0.0828688	0.654865	-4.07172
sp|O75347|TBCA_HUMAN	TBCA	Tubulin-specific chaperone A OS=Homo sapiens OX=9606 GN=TBCA PE=1 SV=3	-0.320356	7.31575	-1.86807	0.0734042	0.629393	-4.07381
sp|Q7KZN9|COX15_HUMAN	COX15	Cytochrome c oxidase assembly protein COX15 homolog OS=Homo sapiens OX=9606 GN=COX15 PE=1 SV=1	-0.53601	7.00646	-1.85695	0.0827516	0.654865	-4.07386
sp|Q99497|PARK7_HUMAN	PARK7	Parkinson disease protein 7 OS=Homo sapiens OX=9606 GN=PARK7 PE=1 SV=2	-0.315447	8.18643	-1.86726	0.0735215	0.629393	-4.07492
sp|Q15654|TRIP6_HUMAN	TRIP6	Thyroid receptor-interacting protein 6 OS=Homo sapiens OX=9606 GN=TRIP6 PE=1 SV=3	-0.237299	6.33602	-1.864	0.073994	0.630798	-4.07935
sp|P81605|DCD_HUMAN	DCD	Dermcidin OS=Homo sapiens OX=9606 GN=DCD PE=1 SV=2	-1.35621	8.89826	-1.85439	0.0845076	0.658676	-4.08253
sp|O43684|BUB3_HUMAN	BUB3	Mitotic checkpoint protein BUB3 OS=Homo sapiens OX=9606 GN=BUB3 PE=1 SV=1	0.186562	7.28349	1.86086	0.0744526	0.633389	-4.08362
sp|Q6PUV4|CPLX2_HUMAN	CPLX2	Complexin-2 OS=Homo sapiens OX=9606 GN=CPLX2 PE=1 SV=2	0.339313	7.51221	1.85955	0.0746441	0.633701	-4.08539
sp|Q8TD19|NEK9_HUMAN	NEK9	Serine/threonine-protein kinase Nek9 OS=Homo sapiens OX=9606 GN=NEK9 PE=1 SV=2	0.4205	6.477	1.85684	0.0750425	0.635764	-4.08907
sp|Q9HDC9|APMAP_HUMAN	APMAP	Adipocyte plasma membrane-associated protein OS=Homo sapiens OX=9606 GN=APMAP PE=1 SV=2	-0.290756	8.28945	-1.85487	0.0753321	0.63624	-4.09173
sp|Q96LD4|TRI47_HUMAN	TRIM47	E3 ubiquitin-protein ligase TRIM47 OS=Homo sapiens OX=9606 GN=TRIM47 PE=1 SV=2	0.409732	7.1147	1.85435	0.0754097	0.63624	-4.09244
sp|P78368|KC1G2_HUMAN	CSNK1G2	Casein kinase I isoform gamma-2 OS=Homo sapiens OX=9606 GN=CSNK1G2 PE=1 SV=1	0.355426	6.94063	1.84971	0.0765852	0.641744	-4.09358
sp|Q8N4V2|SVOP_HUMAN	SVOP	Synaptic vesicle 2-related protein OS=Homo sapiens OX=9606 GN=SVOP PE=1 SV=1	0.269302	7.61347	1.84772	0.0768815	0.641744	-4.09622
sp|Q5T447|HECD3_HUMAN	HECTD3	E3 ubiquitin-protein ligase HECTD3 OS=Homo sapiens OX=9606 GN=HECTD3 PE=1 SV=1	0.269993	7.13267	1.85035	0.0760023	0.639921	-4.09784
[truncated: 3,598 more rows]

## Sheet: 18 male samples
Accession.Number	Genes	Protein.Description	logFC	AveExpr	t	P.Value	adj.P.Val	B
[truncated: 4,092 more rows]
